# Supplementary material for: Palladium/GF-Phos-catalyzed asymmetric carbenylative amination to access chiral pyrrolidines and piperidines
Source: Royal Society of Chemistry journal article supplement (doi:10.1039/d2sc03999k), 2022-01-01

## Supporting Information

### **Palladium/GF-Phos-Catalyzed Asymmetric Carbenylative Amination to Access Chiral Pyrrolidines and Piperidines**

Yue Sun, Chun Ma, Zhiming Li\* and Junliang Zhang\*

#### **Contents**

|                                                                      |     |
|----------------------------------------------------------------------|-----|
| 1. General Information.....                                          | S2  |
| 2. Optimization of Reaction Conditions .....                         | S3  |
| 3. General Procedure for the Synthesis of Substrates 1, 4.....       | S6  |
| 4. General Procedure for the Synthesis of Products 3, 5 .....        | S12 |
| 5. Gram-scale Reaction and Synthetic Applications.....               | S45 |
| 6. Nonlinear Effect Study .....                                      | S48 |
| 7. References.....                                                   | S49 |
| 8. X-ray Single Crystal Data for Compound 3ac.....                   | S50 |
| 9. <sup>1</sup> H, <sup>13</sup> C, <sup>19</sup> F NMR Spectra..... | S51 |

## 1. General Information

<sup>1</sup>H NMR spectra, <sup>13</sup>C NMR spectra and <sup>19</sup>F NMR spectra were recorded on a Bruker 400 MHz spectrometer in CDCl<sub>3</sub>. All signals are reported in parts per million (ppm), and were referenced to CDCl<sub>3</sub> (δ 7.26 ppm for <sup>1</sup>H NMR and 77.0 ppm for <sup>13</sup>C NMR) as the internal standard. Data for <sup>1</sup>H NMR spectra are reported as follows: chemical shift (δ ppm), multiplicity (s = singlet, d = doublet, t = triplet, q = quartet, dd = doublet of doublets, dt = doublet of triplets, td = triplet of doublets, m = multiplet), coupling constant (Hz) and integration. HRMS analysis was performed on a Q-TOF mass analyzer using the ESI ionization method. Optical rotation values were measured with instruments operating at λ = 589 nm, corresponding to the sodium D line at the temperatures indicated. The *er* value was determined by HPLC with a chiral stationary phase using a Chiralpak AD-H, OD-H, OJ-H. All samples tested by chiral stationary phase HPLC were dissolved in *n*-hexane/isopropanol.

Unless otherwise noted, all reactions were carried out under a nitrogen atmosphere in sealed tube with magnetic stirring. All commercial materials were used without further purification. 2-Methyltetrahydrofuran (anhydrous) was purchased from Energy Chemical. Visualization of the developed chromatogram was performed by UV light, staining with iodine (dispersed in silica gel), or by KMnO<sub>4</sub> stain. Flash column chromatography was performed over silica gel (300-400 mesh, purchased from Yantai, China). Substrates (*E*)-vinyl iodides **1**, **4**<sup>[1-3]</sup>, *N*-tosylhydrazones **2**<sup>[4]</sup> were synthesized according to the literature method.

## 2. Optimization of Reaction Conditions

### 2.1 Table S1. Optimization of palladium catalyst.<sup>a</sup>

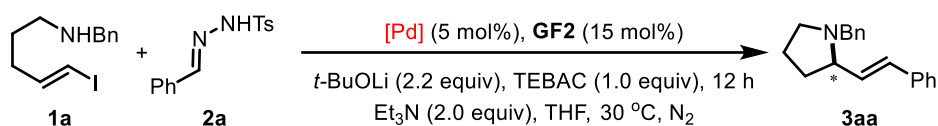

| entry | [Pd]                                                  | yield (%) <sup>b</sup> | <i>er</i> <sup>c</sup> |
|-------|-------------------------------------------------------|------------------------|------------------------|
| 1     | Pd <sub>2</sub> (dba) <sub>3</sub>                    | 77                     | 91.5:8.5               |
| 2     | Pd <sub>2</sub> (dba) <sub>3</sub> •CHCl <sub>3</sub> | 75                     | 92:8                   |
| 3     | Pd(dba) <sub>2</sub>                                  | 86                     | 89.5:10.5              |
| 4     | [Pd(C <sub>3</sub> H <sub>5</sub> )Cl] <sub>2</sub>   | 80                     | 91.5:8.5               |
| 5     | Pd(OAc) <sub>2</sub>                                  | 82                     | 85:15                  |
| 6     | PdBr <sub>2</sub>                                     | 78                     | 88:12                  |
| 7     | PdI <sub>2</sub>                                      | 74                     | 88.5:11.5              |
| 8     | Pd(TFA) <sub>2</sub>                                  | 81                     | 89:11                  |
| 9     | Pd(acac) <sub>2</sub>                                 | 89                     | 86.5:13.5              |

<sup>a</sup>Reaction conditions: **1a** (0.1 mmol), **2a** (0.16 mmol), [Pd] (5 mol%), **GF2** (15 mol%), *t*-BuOLi (2.2 equiv), TEAC (1.0 equiv), Et<sub>3</sub>N (2.0 equiv) in 0.1 M THF at 30 °C for 12 h. <sup>b</sup>Determined by GC analysis with *n*-tetradecane as an internal standard. <sup>c</sup>The *er* value was determined by HPLC.

### 2.2 Table S2. Optimization of solvent.<sup>a</sup>

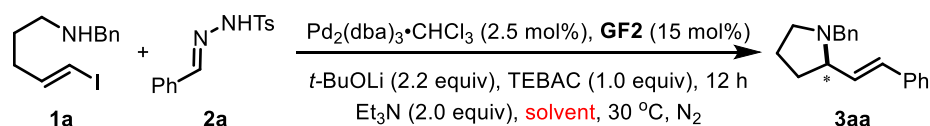

| entry | solvent            | yield (%) <sup>b</sup> | <i>er</i> <sup>c</sup> |
|-------|--------------------|------------------------|------------------------|
| 1     | THF                | 75                     | 92:8                   |
| 2     | 2-MeTHF            | 89                     | 93:7                   |
| 3     | 1,4-Dioxane        | 38                     | 88.5:11.5              |
| 4     | MTBE               | 28                     | 93:7                   |
| 5     | DMF                | 90                     | 80:20                  |
| 6     | MeOH               | 23                     | 86.5:13.5              |
| 7     | DCE                | 38                     | 79.5:20.5              |
| 8     | Toluene            | 23                     | 92.5:7.5               |
| 9     | DMSO               | 71                     | 66.5:33.5              |
| 10    | CH <sub>3</sub> CN | 53                     | 80:20                  |
| 11    | EtOAc              | 67                     | 93:7                   |

<sup>a</sup>Reaction conditions: **1a** (0.1 mmol), **2a** (0.16 mmol), Pd<sub>2</sub>(dba)<sub>3</sub>•CHCl<sub>3</sub> (2.5 mol%), **GF2** (15 mol%), *t*-BuOLi (2.2 equiv), TEAC (1.0 equiv), Et<sub>3</sub>N (2.0 equiv) in 0.1 M solvent at 30 °C for 12 h. <sup>b</sup>Determined by GC analysis with *n*-tetradecane as an internal standard. <sup>c</sup>The *er* value was determined by HPLC. THF = Tetrahydrofuran. MTBE = methyl *tert*-butyl ether. DMF = *N,N*-Dimethylformamide. DCE = 1,2-Dichloroethane. DMSO = Dimethyl sulfoxide.

### 2.3 Table S3 Optimization of temperature.<sup>a</sup>

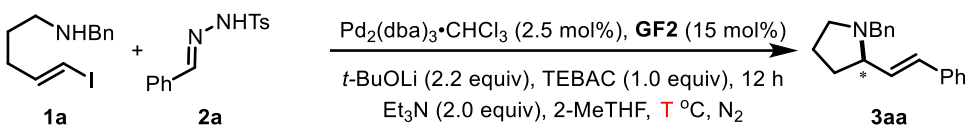

| entry | T (°C) | yield (%) <sup>b</sup> | er <sup>c</sup> |
|-------|--------|------------------------|-----------------|
| 1     | 15     | 26                     | 94.5:5.5        |
| 2     | 30     | 89                     | 93:7            |
| 3     | 45     | 71                     | 90:10           |
| 4     | 60     | 63                     | 88:12           |

<sup>a</sup>Reaction conditions: **1a** (0.1 mmol), **2a** (0.16 mmol), Pd<sub>2</sub>(dba)<sub>3</sub>·CHCl<sub>3</sub> (2.5 mol%), **GF2** (15 mol%), *t*-BuOLi (2.2 equiv), TEAC (1.0 equiv), Et<sub>3</sub>N (2.0 equiv) in 0.1 M 2-MeTHF for 12 h. <sup>b</sup>Determined by GC analysis with *n*-tetradecane as an internal standard. <sup>c</sup>The *er* value was determined by HPLC.

### 2.4 Table S4. Optimization of base.<sup>a</sup>

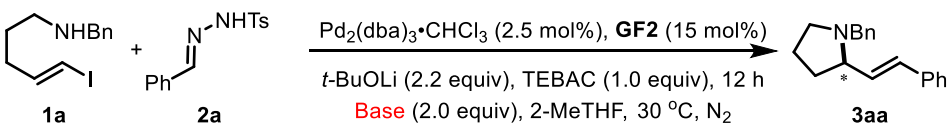

| entry           | Base                            | yield (%) <sup>b</sup> | er <sup>c</sup> |
|-----------------|---------------------------------|------------------------|-----------------|
| 1               | None                            | 83                     | 93:7            |
| 2               | Et <sub>3</sub> N               | 89                     | 93:7            |
| 3               | DABCO                           | 76                     | 94:6            |
| 4               | DIPEA                           | 86                     | 93:7            |
| 5               | PhNHMe                          | 91                     | 92.5:7.5        |
| 6               | PhNMe <sub>2</sub>              | 83                     | 92.5:7.5        |
| 7               | KOH                             | 89                     | 93:7            |
| 8               | KHCO <sub>3</sub>               | 70                     | 93.5:6.5        |
| 9               | NaHCO <sub>3</sub>              | 83                     | 93:7            |
| 10              | Na <sub>2</sub> CO <sub>3</sub> | 83                     | 92:8            |
| 11              | Cs <sub>2</sub> CO <sub>3</sub> | 93                     | 92.5:7.5        |
| 12              | CsOAc                           | 69                     | 88:12           |
| 13 <sup>d</sup> | None                            | 84                     | 91:9            |

<sup>a</sup>Reaction conditions: **1a** (0.1 mmol), **2a** (0.16 mmol), Pd<sub>2</sub>(dba)<sub>3</sub>·CHCl<sub>3</sub> (2.5 mol%), **GF2** (15 mol%), *t*-BuOLi (2.2 equiv), TEAC (1.0 equiv), Base (2.0 equiv) in 0.1 M 2-MeTHF at 30 °C for 12 h. <sup>b</sup>Determined by GC analysis with *n*-tetradecane as an internal standard. <sup>c</sup>The *er* value was determined by HPLC. <sup>d</sup>Without TEAC. DABCO = Triethylenediamine. DIPEA = *N,N*-Diisopropylethylamine.

## 2.5 Table S5. Optimization of additive.<sup>a</sup>

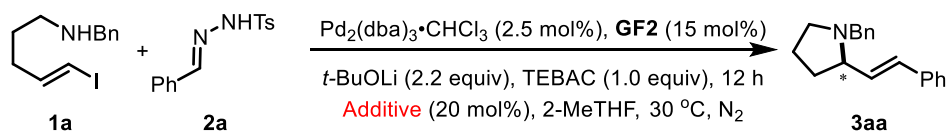

| entry           | Additive                        | yield (%) <sup>b</sup> | <i>er</i> <sup>c</sup> |
|-----------------|---------------------------------|------------------------|------------------------|
| 1               | None                            | 83                     | 93:7                   |
| 2               | AcOH                            | 71                     | 93:7                   |
| 3               | TsOH                            | 64                     | 93:7                   |
| 4               | Sc(OTf) <sub>3</sub>            | 57                     | 92.5:7.5               |
| 5               | Zn(OTf) <sub>2</sub>            | 56                     | 92.5:7.5               |
| 6               | AgOTf                           | 87                     | 93:7                   |
| 7               | AgClO <sub>4</sub>              | 76                     | 92.5:7.5               |
| 8               | AgPF <sub>6</sub>               | 78                     | 93:7                   |
| 9               | AgBF <sub>4</sub>               | 75                     | 93:7                   |
| 10              | AgF                             | 77                     | 94:6                   |
| 11              | Ag <sub>2</sub> SO <sub>4</sub> | 79                     | 94:6                   |
| 12              | Ag <sub>2</sub> CO <sub>3</sub> | 81                     | 94.5:5.5               |
| 13 <sup>d</sup> | Ag <sub>2</sub> CO <sub>3</sub> | 77                     | 94.5:5.5               |
| 14 <sup>e</sup> | Ag <sub>2</sub> CO <sub>3</sub> | 67                     | 92.5:7.5               |

<sup>a</sup>Reaction conditions: **1a** (0.1 mmol), **2a** (0.16 mmol), Pd<sub>2</sub>(dba)<sub>3</sub>·CHCl<sub>3</sub> (2.5 mol%), **GF2** (15 mol%), *t*-BuOLi (2.2 equiv), TEBAC (1.0 equiv), additive (20 mol%) in 0.1 M 2-MeTHF at 30 °C for 12 h. <sup>b</sup>Determined by GC analysis with *n*-tetradecane as an internal standard. <sup>c</sup>The *er* value was determined by HPLC. <sup>d</sup>15 mol% Ag<sub>2</sub>CO<sub>3</sub>. <sup>e</sup>30 mol% Ag<sub>2</sub>CO<sub>3</sub>.

### 3. General Procedure for the Synthesis of Substrates 1, 4

The materials **1** and **4** were prepared according to the known synthetic route in literature.<sup>[1-3]</sup>

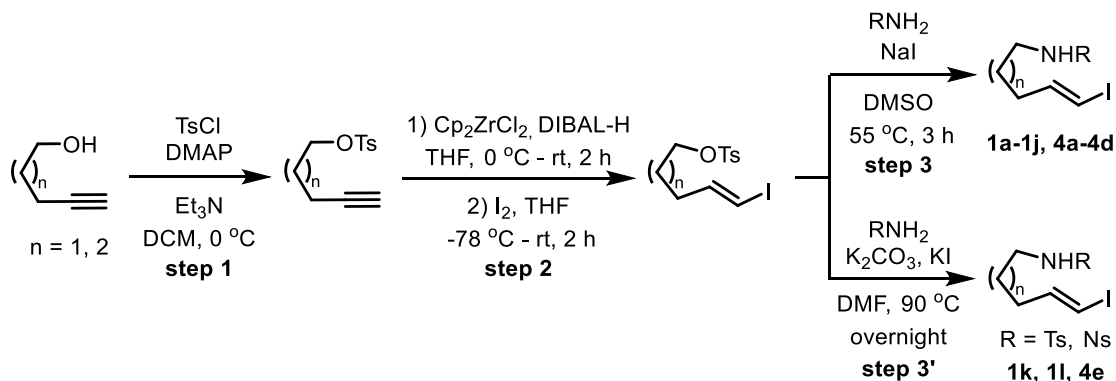

**Step 1:** To a solution of alkynol (1.0 equiv),  $\text{Et}_3\text{N}$  (1.5 equiv), and 4-(dimethylamino) pyridine (5 mol%) in  $\text{DCM}$  (0.5 M) at  $0\text{ }^\circ\text{C}$  was added *p*-toluenesulfonyl chloride (1.3 equiv) in three portions. The reaction mixture was stirred at room temperature until the starting material was no longer detectable by thin layer chromatography (2 h). The reaction mixture was added aqueous  $\text{NaOH}$  solution (1 M) and vigorously stirred for 30 min at room temperature, and then was extracted with  $\text{DCM}$ . The combined organic phases were dried over  $\text{Na}_2\text{SO}_4$  and concentrated *in vacuo*. The residue was purified by silica gel chromatography using  $\text{PE/EA} = 20/1$  as the eluent to afford the desired product.

**Step 2:** A flame-dried flask equipped with a stir bar under  $\text{N}_2$  was charged with  $\text{Cp}_2\text{ZrCl}_2$  (1.2 equiv) in dry  $\text{THF}$  to give a 2.5 M suspension. The reaction mixture was kept in ice bath,  $\text{DIBAL-H}$  (1.22 equiv) was added dropwise and stirred for 1 h at room temperature. Then the reaction mixture was cooled to  $0\text{ }^\circ\text{C}$  again and the alkyne obtained above in  $\text{THF}$  was added dropwise and stirred for 1 h at room temperature. After cooling to  $-78\text{ }^\circ\text{C}$ , iodine (1.4 equiv) in  $\text{THF}$  (1 M) was added dropwise and the reaction mixture was stirred for 3 h at room temperature. Upon completion, the reaction was quenched with water at  $0\text{ }^\circ\text{C}$  and then added aqueous  $\text{NaOH}$  solution (3 M). The mixture was extracted with  $\text{EtOAc}$  and washed with  $\text{Na}_2\text{S}_2\text{O}_3$ . The organic layer was dried over  $\text{Na}_2\text{SO}_4$  and concentrated *in vacuo*. The residue was purified by silica gel

chromatography using PE/EA = 20/1 as the eluent to afford the desired vinyl iodide.

**Step 3:** To a solution of the above obtained vinyl iodide (1.0 equiv), NaI (0.055 equiv) in DMSO (0.3 M) was added corresponding primary amine (1.5 equiv). The mixture was heated to 55 °C until the starting material was no longer detectable by thin layer chromatography (3-6 h). The reaction mixture was cooled to room temperature and quenched with a saturated solution of NH<sub>4</sub>Cl. Then the mixture was extracted with EtOAc and washed with water. The organic layer was dried over Na<sub>2</sub>SO<sub>4</sub> and concentrated *in vacuo*. The residue was purified by silica gel chromatography using PE/EA/Et<sub>3</sub>N as the eluent to afford the desired product **1a-1j**, **4a-4d**.

**Step 3':** To a solution of the above obtained vinyl iodide (1.0 equiv), K<sub>2</sub>CO<sub>3</sub> (2 equiv), KI (0.1 equiv) in DMF (0.5 M) was added corresponding primary amine (1.5 equiv). The mixture was heated to 90 °C and stirred overnight. The reaction mixture was cooled to room temperature and quenched with a saturated solution of NH<sub>4</sub>Cl. Then the mixture was extracted with EtOAc and washed with water. The organic layer was dried over Na<sub>2</sub>SO<sub>4</sub> and concentrated *in vacuo*. The residue was purified by silica gel chromatography using PE/EA/DCM as the eluent to afford the desired product **1k**, **1l**, **4e**.

#### Characterization of structurally novel substrates **1b-1l**, **4c-4e**

##### **(E)-N-(2-bromobenzyl)-5-iodopent-4-en-1-amine (1b):**

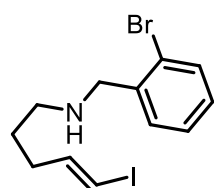

Orange oil.

<sup>1</sup>H NMR (400 MHz, CDCl<sub>3</sub>) δ 7.53 (d, *J* = 7.9 Hz, 1H), 7.36 (dd, *J* = 7.6, 1.5 Hz, 1H), 7.31 – 7.23 (m, 1H), 7.11 (td, *J* = 7.7, 1.6 Hz, 1H), 6.49 (dt, *J* = 14.3, 7.2 Hz, 1H), 5.99 (d, *J* = 14.4 Hz, 1H), 3.83 (s, 2H), 2.61 (t, *J* = 7.1 Hz, 2H), 2.15 – 2.07 (m, 2H), 1.64 – 1.59 (m, 2H), 1.58 (s, 1H); <sup>13</sup>C NMR (100 MHz, CDCl<sub>3</sub>) δ 145.9, 139.1, 132.7, 130.2, 128.5, 127.3, 123.8, 74.9, 53.6, 48.0, 33.6, 28.5. HRMS (ESI) calculated for C<sub>12</sub>H<sub>16</sub>BrIN [(M+H)<sup>+</sup>]: 379.9505, found: 379.9505.

##### **(E)-5-iodo-N-(2-methylbenzyl)pent-4-en-1-amine (1c):**

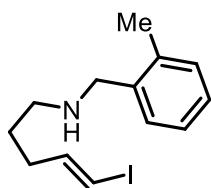

Dark orange oil.

$^1\text{H}$  NMR (400 MHz,  $\text{CDCl}_3$ )  $\delta$  7.33 – 7.26 (m, 1H), 7.23 – 7.15 (m, 3H), 6.54 (dt,  $J = 14.3, 7.1$  Hz, 1H), 6.01 (d,  $J = 14.4$  Hz, 1H), 3.77 (s, 2H), 2.69 (t,  $J = 7.1$  Hz, 2H), 2.37 (s, 3H), 2.20 – 2.09 (m, 2H), 1.68 – 1.58 (m, 2H), 1.38 (s, 1H);  $^{13}\text{C}$  NMR (100 MHz,  $\text{CDCl}_3$ )  $\delta$  146.0, 138.2, 136.1, 130.2, 128.2, 126.9, 125.8, 74.7, 51.5, 48.7, 33.7, 28.6, 18.9. HRMS (ESI) calculated for  $\text{C}_{13}\text{H}_{19}\text{IN}$  [(M+H) $^+$ ]: 316.0557, found: 316.0551.

**(E)-N-(3-fluorobenzyl)-5-iodopent-4-en-1-amine (1d):**

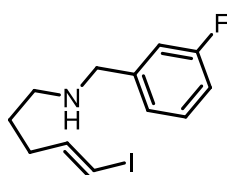

Brown oil.

$^1\text{H}$  NMR (400 MHz,  $\text{CDCl}_3$ )  $\delta$  7.30 – 7.23 (m, 1H), 7.07 (d,  $J = 7.7$  Hz, 1H), 7.05 – 7.00 (m, 1H), 6.93 (td,  $J = 8.4, 2.2$  Hz, 1H), 6.50 (dt,  $J = 14.3, 7.1$  Hz, 1H), 6.00 (d,  $J = 14.4$  Hz, 1H), 3.76 (s, 2H), 2.61 (t,  $J = 7.1$  Hz, 2H), 2.14 – 2.08 (m, 2H), 1.64 – 1.54 (m, 2H), 1.46 (s, 1H);  $^{13}\text{C}$  NMR (100 MHz,  $\text{CDCl}_3$ )  $\delta$  162.9 (d,  $J = 244.2$  Hz), 145.9, 143.1 (d,  $J = 7.0$  Hz), 129.7 (d,  $J = 8.1$  Hz), 123.5 (d,  $J = 2.8$  Hz), 114.7 (d,  $J = 21.0$  Hz), 113.7 (d,  $J = 21.1$  Hz), 74.8, 53.3, 53.2, 48.3, 33.7, 28.6.  $^{19}\text{F}$  NMR (377 MHz,  $\text{CDCl}_3$ )  $\delta$  -113.5. HRMS (ESI) calculated for  $\text{C}_{12}\text{H}_{16}\text{FIN}$  [(M+H) $^+$ ]: 320.0306, found: 320.0300.

**(E)-5-iodo-N-(3-methylbenzyl)pent-4-en-1-amine (1e):**

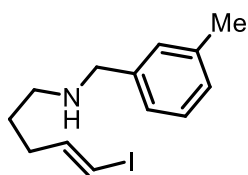

Orange oil.

$^1\text{H}$  NMR (400 MHz,  $\text{CDCl}_3$ )  $\delta$  7.24 – 7.20 (m, 1H), 7.16 – 7.07 (m, 2H), 7.07 (d,  $J = 7.5$  Hz, 1H), 6.52 (dt,  $J = 14.3, 7.2$  Hz, 1H), 6.00 (dt,  $J = 14.3, 1.4$  Hz, 1H), 3.74 (s, 2H), 2.63 (t,  $J = 7.1$  Hz, 2H), 2.35 (s, 3H), 2.15 – 2.09 (m, 2H), 1.64 – 1.58 (m, 2H), 1.34 (s, 1H);  $^{13}\text{C}$  NMR (100 MHz,  $\text{CDCl}_3$ )  $\delta$  146.0, 140.2, 138.0, 128.8, 128.2, 127.6, 125.1, 74.8, 53.9, 48.4, 33.7, 28.6, 21.4. HRMS (ESI) calculated for  $\text{C}_{13}\text{H}_{19}\text{IN}$  [(M+H) $^+$ ]: 316.0557, found: 316.0549.

**(E)-N-(4-bromobenzyl)-5-iodopent-4-en-1-amine (1f):**

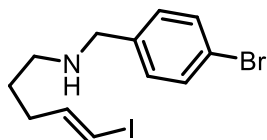

Orange oil.

$^1\text{H}$  NMR (400 MHz,  $\text{CDCl}_3$ )  $\delta$  7.43 (d,  $J = 8.3$  Hz, 2H), 7.18 (d,  $J = 8.2$  Hz, 2H), 6.49 (dt,  $J = 14.3, 7.1$  Hz, 1H), 5.99 (dt,  $J =$



14.4, 1.4 Hz, 1H), 3.72 (s, 2H), 2.60 (t,  $J = 7.1$  Hz, 2H), 2.14 – 2.07 (m, 2H), 1.64 – 1.54 (m, 2H), 1.51 (s, 1H);  $^{13}\text{C}$  NMR (100 MHz,  $\text{CDCl}_3$ )  $\delta$  145.9, 139.3, 131.4, 129.7, 120.6, 74.8, 53.2, 48.3, 33.7, 28.6. HRMS (ESI) calculated for  $\text{C}_{12}\text{H}_{16}\text{BrIN}$   $[(\text{M}+\text{H})^+]$ : 379.9505, found: 379.9503.

**(E)-5-iodo-N-(4-methoxybenzyl)pent-4-en-1-amine (1g):**

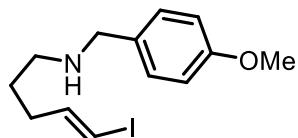

Yellow oil.

$^1\text{H}$  NMR (400 MHz,  $\text{CDCl}_3$ )  $\delta$  7.22 (d,  $J = 7.3$  Hz, 2H), 6.86 (d,  $J = 7.3$  Hz, 2H), 6.50 (dt,  $J = 14.3, 7.1$  Hz, 1H), 5.99 (d,  $J = 14.4$  Hz, 1H), 3.80 (s, 3H), 3.71 (s, 2H), 2.61 (t,  $J = 7.1$  Hz, 2H), 2.15 – 2.07 (m, 2H), 1.63 – 1.55 (m, 2H), 1.43 (s, 1H);  $^{13}\text{C}$  NMR (100 MHz,  $\text{CDCl}_3$ )  $\delta$  158.5, 146.0, 132.4, 129.1, 113.7, 74.7, 55.2, 53.2, 48.2, 33.7, 28.6. HRMS (ESI) calculated for  $\text{C}_{13}\text{H}_{19}\text{INO}$   $[(\text{M}+\text{H})^+]$ : 332.0506, found: 332.0506.

**(E)-N-(4-(tert-butyl)benzyl)-5-iodopent-4-en-1-amine (1h):**

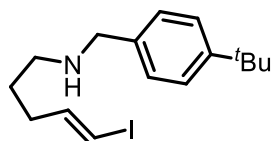

Brown oil.

$^1\text{H}$  NMR (400 MHz,  $\text{CDCl}_3$ )  $\delta$  7.41 – 7.36 (m, 2H), 7.30 – 7.26 (m, 2H), 6.54 (dt,  $J = 14.3, 7.2$  Hz, 1H), 6.02 (dt,  $J = 14.3, 1.4$  Hz, 1H), 3.77 (s, 2H), 2.67 (t,  $J = 7.1$  Hz, 2H), 2.17 – 2.11 (m, 2H), 1.67 – 1.61 (m, 2H), 1.58 (s, 1H), 1.35 (s, 9H).  $^{13}\text{C}$  NMR (100 MHz,  $\text{CDCl}_3$ )  $\delta$  149.8, 146.0, 137.1, 127.8, 125.3, 74.8, 53.5, 48.4, 34.4, 33.7, 31.3, 28.6. HRMS (ESI) calculated for  $\text{C}_{16}\text{H}_{25}\text{IN}$   $[(\text{M}+\text{H})^+]$ : 358.1026, found: 358.1021.

**(E)-N-(3,5-dimethoxybenzyl)-5-iodopent-4-en-1-amine (1i):**

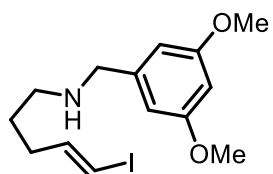

Yellow oil.

$^1\text{H}$  NMR (400 MHz,  $\text{CDCl}_3$ )  $\delta$  6.54 – 6.47 (m, 1H), 6.46 (s, 2H), 6.34 (s, 1H), 5.98 (d,  $J = 14.3$  Hz, 1H), 3.77 (s, 6H), 3.69 (s, 2H), 2.60 (t,  $J = 7.1$  Hz, 2H), 2.12 – 2.05 (m, 2H), 1.71 (s, 1H), 1.61 – 1.54 (m, 2H);  $^{13}\text{C}$  NMR (100 MHz,  $\text{CDCl}_3$ )  $\delta$  160.7, 145.9, 142.7, 105.8, 98.8, 74.7, 55.2, 53.9, 48.2, 33.6, 28.5. HRMS (ESI) calculated for  $\text{C}_{14}\text{H}_{21}\text{INO}_2$   $[(\text{M}+\text{H})^+]$ : 362.0612, found: 362.0613.

**(E)-5-iodo-N-(naphthalen-1-ylmethyl)pent-4-en-1-amine (1j):**

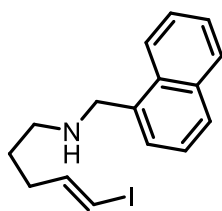

Yellow oil.

$^1\text{H}$  NMR (400 MHz,  $\text{CDCl}_3$ )  $\delta$  8.13 (d,  $J = 8.3$  Hz, 1H), 7.88 (d,  $J = 7.9$  Hz, 1H), 7.78 (d,  $J = 7.7$  Hz, 1H), 7.56 – 7.42 (m, 4H), 6.52 (dddt,  $J = 14.3, 8.7, 7.1, 1.5$  Hz, 1H), 5.98 (dq,  $J = 14.4, 1.7$  Hz, 1H), 4.23 (s, 2H), 2.78 – 2.72 (m, 2H), 2.17 – 2.10 (m, 2H), 1.68 – 1.61 (m, 2H), 1.42 (s, 1H);  $^{13}\text{C}$  NMR (100 MHz,  $\text{CDCl}_3$ )  $\delta$  145.9, 135.8, 133.7, 131.6, 128.6, 127.6, 125.9, 125.8, 125.5, 125.3, 123.5, 74.8, 51.5, 48.8, 33.6, 28.5. HRMS (ESI) calculated for  $\text{C}_{16}\text{H}_{19}\text{IN}$  [(M+H) $^+$ ]: 352.0557, found: 352.0557.

**(E)-N-(5-iodopent-4-en-1-yl)-4-methylbenzenesulfonamide (1k):**

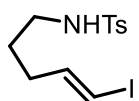

Gray solid (m.p. 62-63 °C).

$^1\text{H}$  NMR (400 MHz,  $\text{CDCl}_3$ )  $\delta$  7.74 (d,  $J = 8.2$  Hz, 2H), 7.32 (d,  $J = 8.0$  Hz, 2H), 6.37 (dt,  $J = 14.4, 7.2$  Hz, 1H), 5.94 (d,  $J = 14.4$  Hz, 1H), 4.76 (t,  $J = 6.1$  Hz, 1H), 2.97 – 2.88 (m, 2H), 2.43 (s, 3H), 2.08 – 2.01 (m, 2H), 1.59 – 1.51 (m, 2H);  $^{13}\text{C}$  NMR (100 MHz,  $\text{CDCl}_3$ )  $\delta$  144.7, 143.5, 136.7, 129.7, 127.0, 75.7, 42.1, 32.7, 28.1, 21.5. HRMS (ESI) calculated for  $\text{C}_{12}\text{H}_{16}\text{INNaO}_2\text{S}$  [(M+Na) $^+$ ]: 387.9839, found: 387.9839.

**(E)-N-(5-iodopent-4-en-1-yl)-4-nitrobenzenesulfonamide (1l):**

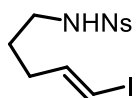

Yellow solid (m.p. 105-106 °C).

$^1\text{H}$  NMR (400 MHz,  $\text{CDCl}_3$ )  $\delta$  8.41 – 8.33 (m, 2H), 8.09 – 8.01 (m, 2H), 6.39 (dt,  $J = 14.4, 7.2$  Hz, 1H), 6.01 (dt,  $J = 14.4, 1.4$  Hz, 1H), 5.04 (t,  $J = 6.1$  Hz, 1H), 3.04 – 2.95 (m, 2H), 2.12 – 2.02 (m, 2H), 1.67 – 1.55 (m, 2H);  $^{13}\text{C}$  NMR (100 MHz,  $\text{CDCl}_3$ )  $\delta$  150.1, 145.7, 144.3, 128.2, 124.5, 76.1, 42.3, 32.6, 28.2. HRMS (ESI) calculated for  $\text{C}_{11}\text{H}_{13}\text{IN}_2\text{NaO}_4\text{S}$  [(M+Na) $^+$ ]: 418.9533, found: 418.9526.

**(E)-N-(6-iodohex-5-en-1-yl)-3-methylaniline (4c):**

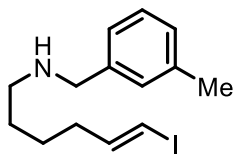

Yellow oil.

$^1\text{H}$  NMR (400 MHz,  $\text{CDCl}_3$ )  $\delta$  7.24 – 7.19 (m, 1H), 7.14 (s, 1H), 7.10 (d,  $J = 7.5$  Hz, 1H), 7.07 (d,  $J = 7.6$  Hz, 1H), 6.50 (dt,  $J = 14.3, 7.1$  Hz, 1H), 5.98 (dt,  $J = 14.4, 1.4$  Hz, 1H), 3.74 (s, 2H), 2.62 (t,  $J = 7.0$  Hz, 2H), 2.35 (s, 3H), 2.11 – 2.02 (m, 2H), 1.56 – 1.49 (m, 2H), 1.49 – 1.41 (m, 3H);  $^{13}\text{C}$  NMR (100 MHz,  $\text{CDCl}_3$ )  $\delta$  146.3, 140.3, 138.0, 128.8, 128.2, 127.6, 125.1, 74.6, 54.0, 49.1, 35.8,

29.3, 26.0, 21.4. HRMS (ESI) calculated for C<sub>14</sub>H<sub>21</sub>IN [(M+H)<sup>+</sup>]: 330.0713, found: 330.0716.

**(E)-N-(6-iodohex-5-en-1-yl)naphthalen-1-amine (4d):**

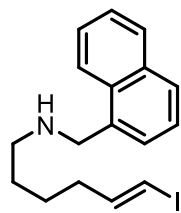

Yellow oil.

<sup>1</sup>H NMR (400 MHz, CDCl<sub>3</sub>) δ 8.14 (d, *J* = 8.5 Hz, 1H), 7.92 – 7.85 (m, 1H), 7.79 (d, *J* = 7.9 Hz, 1H), 7.58 – 7.50 (m, 2H), 7.50 – 7.47 (m, 1H), 7.47 – 7.42 (m, 1H), 6.51 (dt, *J* = 14.3, 7.2 Hz, 1H), 5.99 (dt, *J* = 14.3, 1.4 Hz, 1H), 4.24 (s, 2H), 2.74 (t, *J* = 7.0 Hz, 2H), 2.11 – 2.02 (m, 2H), 1.61 – 1.51 (m, 2H), 1.51 – 1.43 (m, 2H), 1.41 (s, 1H); <sup>13</sup>C NMR (100 MHz, CDCl<sub>3</sub>) δ 146.3, 135.9, 133.8, 131.7, 128.6, 127.6, 126.0, 125.9, 125.5, 125.3, 123.5, 74.6, 51.6, 49.5, 35.8, 29.3, 26.0. HRMS (ESI) calculated for C<sub>17</sub>H<sub>21</sub>IN [(M+H)<sup>+</sup>]: 366.0713, found: 366.0709.

**(E)-N-(6-iodohex-5-en-1-yl)-4-nitrobenzenesulfonamide (4e):**

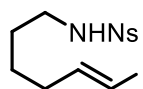

Yellow solid (m.p. 73-74 °C).

<sup>1</sup>H NMR (400 MHz, CDCl<sub>3</sub>) δ 8.35 – 8.30 (m, 2H), 8.07 – 8.01 (m, 2H), 6.35 (dt, *J* = 14.3, 7.1 Hz, 1H), 5.91 (dt, *J* = 14.4, 1.4 Hz, 1H), 5.39 (s, 1H), 2.96 (t, *J* = 6.9 Hz, 2H), 2.03 – 1.94 (m, 2H), 1.50 – 1.41 (m, 2H), 1.40 – 1.31 (m, 2H); <sup>13</sup>C NMR (100 MHz, CDCl<sub>3</sub>) δ 149.7, 145.6, 145.4, 128.1, 124.3, 75.1, 42.8, 35.0, 28.5, 24.8. HRMS (ESI) calculated for C<sub>12</sub>H<sub>15</sub>IN<sub>2</sub>NaO<sub>4</sub>S [(M+Na)<sup>+</sup>]: 432.9689, found: 432.9694.

#### 4. General Procedure for the Synthesis of Products 3, 5

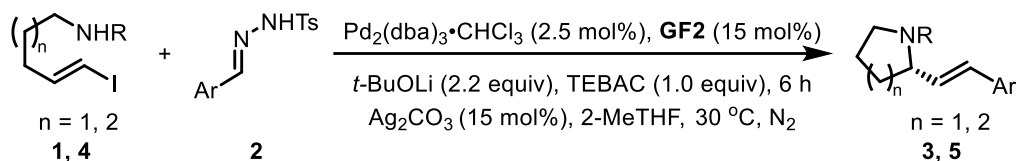

To a 10 mL sealed tube was added *N*-tosylhydrazones **2** (0.48 mmol, 1.6 equiv), Pd<sub>2</sub>(dba)<sub>3</sub>·CHCl<sub>3</sub> (0.0075 mmol, 2.5 mol%), **GF2** (0.045 mmol, 15 mol%), *t*-BuOLi (0.66 mmol, 2.2 equiv), Ag<sub>2</sub>CO<sub>3</sub> (0.045 mmol, 15 mol%), and triethylbenzylammonium chloride (TEBAC, 0.3 mmol, 1.0 equiv) was added in the glove box. The reaction tube was evacuated and back-filled with N<sub>2</sub> three times and a solution of the vinyl iodide **1**, **4** (0.3 mmol, 1.0 equiv, 0.1 M in 2- MeTHF) was added under nitrogen atmosphere. Then the tube was stirred at 30 °C for 6 h. Upon completion, the reaction mixture was filtered through celite, evaporated *in vacuo* and purified by silica gel column chromatography (DCM to PE/Et<sub>3</sub>N = 50/1) to give the desired product **3**, **5**.

##### (*S,E*)-1-benzyl-2-styrylpyrrolidine (**3aa**):

White solid (69 mg, 87% yield), 94.5:5.5 *er.* m.p. 61-62 °C; [α]<sub>D</sub><sup>20</sup> = -38.2 (*c* 0.56, CHCl<sub>3</sub>); <sup>1</sup>H NMR (400 MHz, CDCl<sub>3</sub>) δ 7.42 (d, *J* = 7.2 Hz, 2H), 7.38 – 7.27 (m, 6H), 7.27 – 7.17 (m, 2H), 6.58 (d, *J* = 15.8 Hz, 1H), 6.21 (dd, *J* = 15.8, 8.3 Hz, 1H), 4.09 (d, *J* = 12.9 Hz, 1H), 3.16 (d, *J* = 12.9 Hz, 1H), 3.01 (t, *J* = 8.2 Hz, 2H), 2.25 – 2.13 (m, 1H), 2.10 – 1.97 (m, 1H), 1.92 – 1.71 (m, 3H); <sup>13</sup>C NMR (100 MHz, CDCl<sub>3</sub>) δ 139.5, 137.2, 132.7, 131.6, 129.0, 128.5, 128.1, 127.3, 126.7, 126.3, 67.9, 58.3, 53.4, 31.8, 22.2. HRMS (ESI) calculated for C<sub>19</sub>H<sub>22</sub>N [(M+H)<sup>+</sup>]: 264.1747, found: 264.1749. HPLC (Daicel Chiralpak OD-H column, *n*-hexane/isopropanol = 90/10, flow rate 1.0 mL/min, 254 nm): t<sub>R</sub> (minor) = 3.7 min, t<sub>R</sub> (major) = 3.9 min.

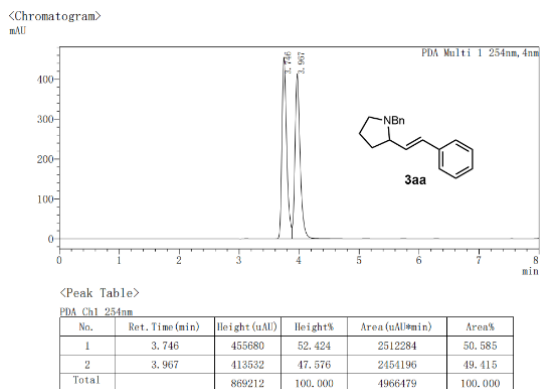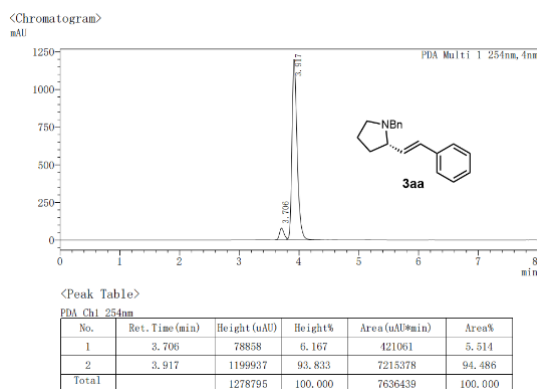

**(S,E)-1-benzyl-2-(4-bromostyryl)pyrrolidine (3ab):**

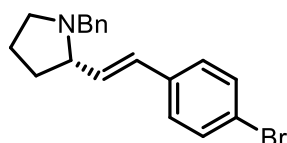

Yellow solid (90.2 mg, 88% yield), 93.5:6.5 *er.* m.p. 51-52 °C;

$[\alpha]_D^{20} = +8.2$  (*c* 0.6, CHCl<sub>3</sub>); <sup>1</sup>H NMR (400 MHz, CDCl<sub>3</sub>) δ 7.47 – 7.40 (m, 2H), 7.35 – 7.28 (m, 4H), 7.27 – 7.26 (m, 1H),

7.26 – 7.20 (m, 2H), 6.50 (d, *J* = 15.9 Hz, 1H), 6.19 (dd, *J* = 15.8, 8.3 Hz, 1H), 4.04 (d,

*J* = 13.0 Hz, 1H), 3.18 (d, *J* = 13.0 Hz, 1H), 3.06 – 2.93 (m, 2H), 2.25 – 2.14 (m, 1H),

2.06 – 2.00 (m, 1H), 1.89 – 1.70 (m, 3H); <sup>13</sup>C NMR (100 MHz, CDCl<sub>3</sub>) δ 139.3, 136.1,

133.6, 131.6, 130.3, 128.9, 128.1, 127.8, 126.8, 121.0, 67.7, 58.4, 53.4, 31.8, 22.2.

HRMS (ESI) calculated for C<sub>19</sub>H<sub>21</sub>BrN [(M+H)<sup>+</sup>]: 342.0852, found: 342.0851. HPLC

(Daicel Chiralpak AD-H column, *n*-hexane/isopropanol = 90/10, flow rate 1.0 mL/min,

254 nm): *t*<sub>R</sub> (major) = 4.0 min, *t*<sub>R</sub> (minor) = 4.6 min.

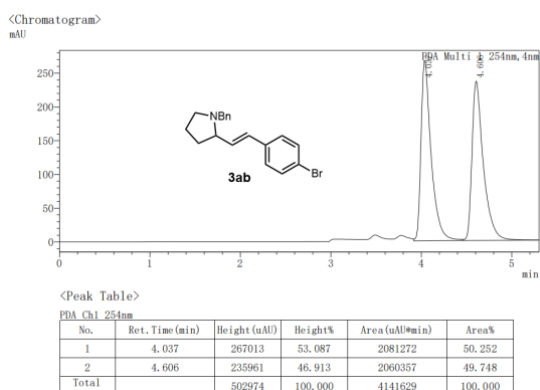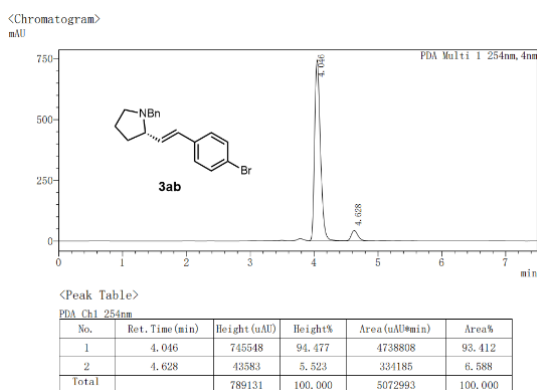

**(S,E)-1-benzyl-2-(4-(tert-butyl)styryl)pyrrolidine (3ac):**

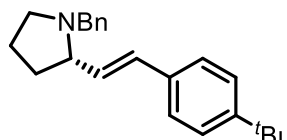

White solid (77.1 mg, 81% yield), 94:6 *er.* m.p. 77-78 °C;

$[\alpha]_D^{20} = -17.9$  (*c* 0.62, CHCl<sub>3</sub>); <sup>1</sup>H NMR (400 MHz, CDCl<sub>3</sub>) δ 7.44 – 7.37 (m, 4H), 7.36 – 7.28 (m, 4H), 7.28 – 7.22 (m, 1H),

6.59 (d, *J* = 15.8 Hz, 1H), 6.21 (dd, *J* = 15.8, 8.4 Hz, 1H), 4.11 (d, *J* = 12.9 Hz, 1H),

3.16 (d,  $J = 12.9$  Hz, 1H), 3.07 – 2.94 (m, 2H), 2.26 – 2.15 (m, 1H), 2.09 – 2.02 (m, 1H), 1.92 – 1.69 (m, 3H), 1.36 (s, 9H);  $^{13}\text{C}$  NMR (100 MHz,  $\text{CDCl}_3$ )  $\delta$  150.4, 139.4, 134.3, 131.8, 131.5, 129.0, 128.1, 126.7, 126.0, 125.4, 67.9, 58.2, 53.3, 34.5, 31.8, 31.3, 22.1. HRMS (ESI) calculated for  $\text{C}_{23}\text{H}_{30}\text{N}$  [(M+H) $^+$ ]: 320.2373, found: 320.2366. HPLC (Daicel Chiralpak AD-H column, *n*-hexane/isopropanol = 97/3, flow rate 0.5 mL/min, 254 nm):  $t_{\text{R}}$  (major) = 7.2 min,  $t_{\text{R}}$  (minor) = 7.9 min.

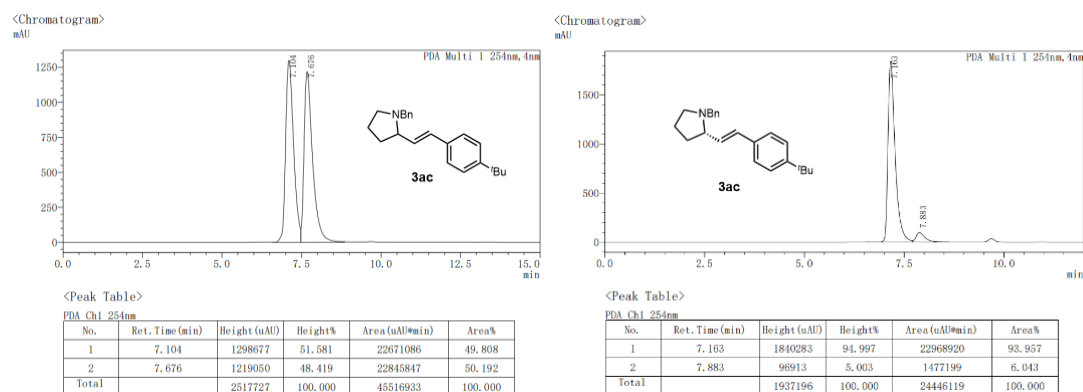

**(*S,E*)-1-benzyl-2-(4-(trifluoromethoxy)styryl)pyrrolidine (3ad):**

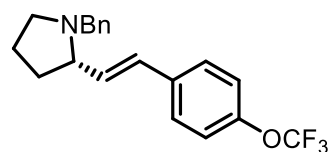

Yellow solid (89.5 mg, 86% yield), 94:6 *er*. m.p. 31-32 °C;  $[\alpha]_{\text{D}}^{20} = -7.7$  ( $c$  0.73,  $\text{CHCl}_3$ );  $^1\text{H}$  NMR (400 MHz,  $\text{CDCl}_3$ )  $\delta$  7.44 – 7.38 (m, 2H), 7.37 – 7.28 (m, 4H), 7.26 – 7.21 (m, 1H), 7.18 (d,  $J = 8.2$  Hz, 2H), 6.55 (d,  $J = 15.9$  Hz, 1H), 6.19 (dd,  $J = 15.8, 8.3$  Hz, 1H), 4.06 (d,  $J = 13.0$  Hz, 1H), 3.19 (d,  $J = 13.0$  Hz, 1H), 3.07 – 2.94 (m, 2H), 2.26 – 2.16 (m, 1H), 2.08 – 2.01 (m, 1H), 1.92 – 1.71 (m, 3H);  $^{13}\text{C}$  NMR (100 MHz,  $\text{CDCl}_3$ )  $\delta$  148.3, 139.4, 136.0, 133.9, 130.1, 129.0, 128.2, 127.5, 126.8, 121.1, 120.5 (d,  $J = 255.2$  Hz), 67.7, 58.4, 53.5, 31.9, 22.3;  $^{19}\text{F}$  NMR (377 MHz,  $\text{CDCl}_3$ )  $\delta$  -57.8. HRMS (ESI) calculated for  $\text{C}_{20}\text{H}_{21}\text{F}_3\text{NO}$  [(M+H) $^+$ ]: 348.1570, found: 348.1568. HPLC (Daicel Chiralpak AD-H column, *n*-hexane/isopropanol = 90/10, flow rate 1.0 mL/min, 254 nm):  $t_{\text{R}}$  (major) = 3.5 min,  $t_{\text{R}}$  (minor) = 3.8 min.

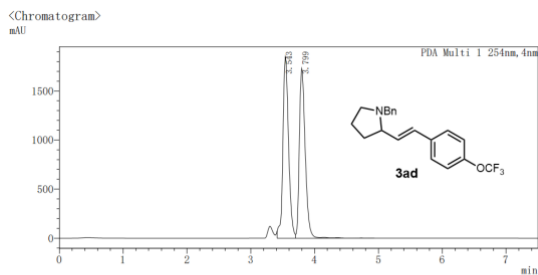

<Peak Table>

| No.   | Ret. Time (min) | Height (uAU) | Height% | Area (uAU*min) | Area%   |
|-------|-----------------|--------------|---------|----------------|---------|
| 1     | 3.543           | 1846943      | 51.635  | 11401707       | 50.684  |
| 2     | 3.799           | 1729988      | 48.365  | 11094102       | 49.316  |
| Total |                 | 3576931      | 100.000 | 22495809       | 100.000 |

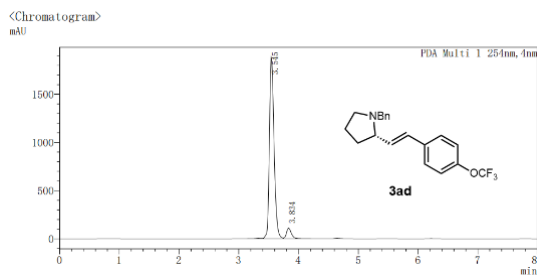

<Peak Table>

| No.   | Ret. Time (min) | Height (uAU) | Height% | Area (uAU*min) | Area%   |
|-------|-----------------|--------------|---------|----------------|---------|
| 1     | 3.545           | 1881584      | 94.508  | 10224428       | 94.185  |
| 2     | 3.804           | 109339       | 5.492   | 631312         | 5.815   |
| Total |                 | 1990923      | 100.000 | 10855740       | 100.000 |

### (*S,E*)-1-benzyl-2-(4-phenoxystyryl)pyrrolidine (**3ae**):

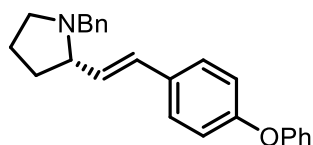

Yellow solid (79.7 mg, 75% yield), 94:6 *er.* m.p. 64-65 °C;

$[\alpha]_D^{20} = +12.5$  (*c* 0.59, CHCl<sub>3</sub>); <sup>1</sup>H NMR (400 MHz, CDCl<sub>3</sub>)

$\delta$  7.40 (d, *J* = 8.6 Hz, 2H), 7.38 – 7.35 (m, 2H), 7.35 – 7.30

(m, 4H), 7.27 – 7.23 (m, 1H), 7.16 – 7.10 (m, 1H), 7.04 (d, *J* = 7.8 Hz, 2H), 7.00 (d, *J*

= 8.6 Hz, 2H), 6.57 (d, *J* = 15.8 Hz, 1H), 6.14 (dd, *J* = 15.8, 8.3 Hz, 1H), 4.11 (d, *J* =

13.0 Hz, 1H), 3.17 (d, *J* = 13.0 Hz, 1H), 3.07 – 2.95 (m, 2H), 2.26 – 2.15 (m, 1H), 2.08

– 2.01 (m, 1H), 1.90 – 1.72 (m, 3H); <sup>13</sup>C NMR (100 MHz, CDCl<sub>3</sub>)  $\delta$  157.2, 156.5, 139.4,

132.4, 131.7, 130.8, 129.7, 129.0, 128.1, 127.6, 126.7, 123.2, 119.0, 118.8, 67.9, 58.3,

53.3, 31.8, 22.1. HRMS (ESI) calculated for C<sub>25</sub>H<sub>26</sub>NO [(M+H)<sup>+</sup>]: 356.2009, found:

356.2007. HPLC (Daicel Chiralpak AD-H column, *n*-hexane/isopropanol = 90/10, flow

rate 1.0 mL/min, 254 nm): *t<sub>R</sub>* (major) = 4.5 min, *t<sub>R</sub>* (minor) = 5.7 min.

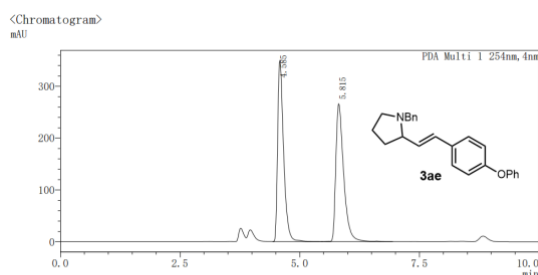

<Peak Table>

| No.   | Ret. Time (min) | Height (uAU) | Height% | Area (uAU*min) | Area%   |
|-------|-----------------|--------------|---------|----------------|---------|
| 1     | 4.585           | 349557       | 56.780  | 3042456        | 49.938  |
| 2     | 5.815           | 266081       | 43.220  | 3049992        | 50.062  |
| Total |                 | 615638       | 100.000 | 6092448        | 100.000 |

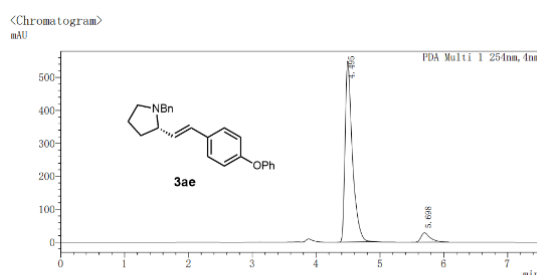

<Peak Table>

| No.   | Ret. Time (min) | Height (uAU) | Height% | Area (uAU*min) | Area%   |
|-------|-----------------|--------------|---------|----------------|---------|
| 1     | 4.495           | 547904       | 95.079  | 4382958        | 93.862  |
| 2     | 5.698           | 28356        | 4.921   | 286802         | 6.138   |
| Total |                 | 576260       | 100.000 | 4669560        | 100.000 |

### (*S,E*)-1-benzyl-2-(4-(methylthio)styryl)pyrrolidine (**3af**):

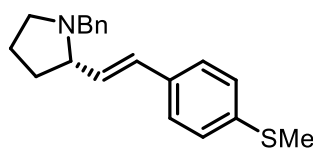

Yellow solid (65.1 mg, 70% yield), 94.5:5.5 *er.* m.p. 49-50

°C;  $[\alpha]_D^{20} = -26.0$  (*c* 0.58, CHCl<sub>3</sub>); <sup>1</sup>H NMR (400 MHz,

CDCl<sub>3</sub>)  $\delta$  7.37 – 7.28 (m, 6H), 7.26 – 7.20 (m, 3H), 6.53 (d,

$J = 15.8$  Hz, 1H), 6.17 (dd,  $J = 15.8, 8.3$  Hz, 1H), 4.08 (d,  $J = 13.0$  Hz, 1H), 3.16 (d,  $J = 13.0$  Hz, 1H), 3.05 – 2.95 (m, 2H), 2.50 (s, 3H), 2.24 – 2.14 (m, 1H), 2.07 – 2.01 (m, 1H), 1.89 – 1.71 (m, 3H);  $^{13}\text{C}$  NMR (100 MHz,  $\text{CDCl}_3$ )  $\delta$  139.4, 137.3, 134.2, 132.1, 130.9, 128.9, 128.1, 126.8, 126.7, 126.6, 67.8, 58.3, 53.3, 31.8, 22.1, 15.9. HRMS (ESI) calculated for  $\text{C}_{20}\text{H}_{24}\text{NS}$   $[(\text{M}+\text{H})^+]$ : 310.1624, found: 310.1619. HPLC (Daicel Chiralpak AD-H column, *n*-hexane/isopropanol = 90/10, flow rate 1.0 mL/min, 254 nm):  $t_{\text{R}}$  (major) = 4.6 min,  $t_{\text{R}}$  (minor) = 6.3 min.

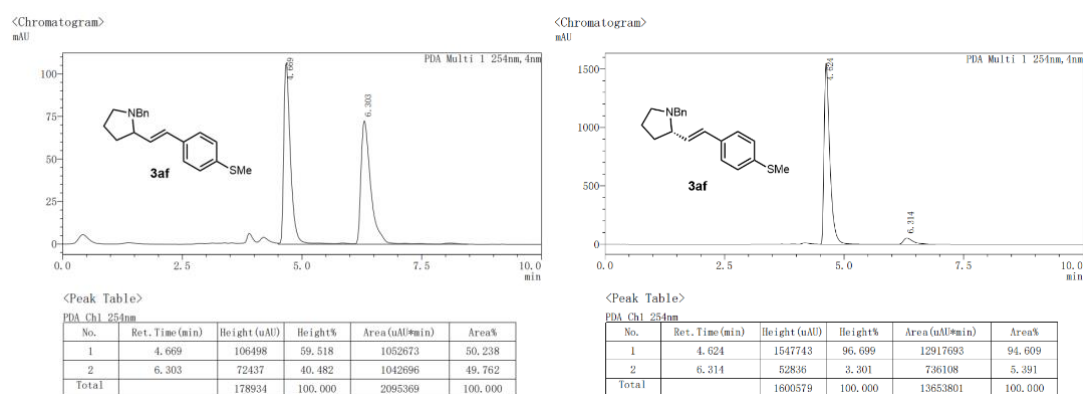

**(*S,E*)-2-(2-([1,1'-biphenyl]-4-yl)vinyl)-1-benzylpyrrolidine (**3ag**):**

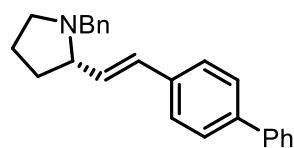

Yellow solid (68.5 mg, 67% yield), 94.5:5.5 *er.* m.p. 99-100 °C;  $[\alpha]_{\text{D}}^{20} = -13.0$  (*c* 0.71,  $\text{CHCl}_3$ );  $^1\text{H}$  NMR (400 MHz,  $\text{CDCl}_3$ )  $\delta$  7.67 – 7.61 (m, 2H), 7.59 (d,  $J = 8.3$  Hz, 2H), 7.50 (d,  $J = 8.3$  Hz, 2H), 7.48 – 7.43 (m, 2H), 7.39 – 7.30 (m, 5H), 7.28 – 7.22 (m, 1H), 6.63 (d,  $J = 15.8$  Hz, 1H), 6.27 (dd,  $J = 15.8, 8.3$  Hz, 1H), 4.11 (d,  $J = 13.0$  Hz, 1H), 3.19 (d,  $J = 13.0$  Hz, 1H), 3.11 – 2.97 (m, 2H), 2.28 – 2.17 (m, 1H), 2.09 – 2.04 (m, 1H), 1.90 – 1.73 (m, 3H);  $^{13}\text{C}$  NMR (100 MHz,  $\text{CDCl}_3$ )  $\delta$  140.7, 140.1, 139.4, 136.2, 132.8, 131.2, 129.0, 128.7, 128.1, 127.2, 126.9, 126.8, 126.7, 67.9, 58.3, 53.4, 31.8, 22.2. HRMS (ESI) calculated for  $\text{C}_{25}\text{H}_{26}\text{N}$   $[(\text{M}+\text{H})^+]$ : 340.2060, found: 340.2051. HPLC (Daicel Chiralpak AD-H column, *n*-hexane/isopropanol = 90/10, flow rate 1.0 mL/min, 254 nm):  $t_{\text{R}}$  (major) = 4.7 min,  $t_{\text{R}}$  (minor) = 6.7 min.



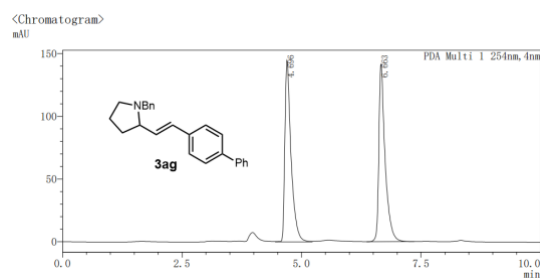

<Peak Table>

| No.   | Ret. Time (min) | Height (uAU) | Height% | Area (uAU*min) | Area%   |
|-------|-----------------|--------------|---------|----------------|---------|
| 1     | 4.696           | 144720       | 50.534  | 1303977        | 50.194  |
| 2     | 6.663           | 141663       | 49.466  | 1293888        | 49.806  |
| Total |                 | 286383       | 100.000 | 2597866        | 100.000 |

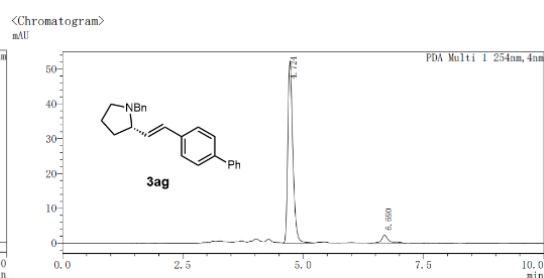

<Peak Table>

| No.   | Ret. Time (min) | Height (uAU) | Height% | Area (uAU*min) | Area%   |
|-------|-----------------|--------------|---------|----------------|---------|
| 1     | 4.724           | 52013        | 95.824  | 381646         | 94.440  |
| 2     | 6.690           | 2267         | 4.176   | 22470          | 5.560   |
| Total |                 | 54280        | 100.000 | 404115         | 100.000 |

### (*S,E*)-1-benzyl-2-(2-ethoxystyryl)pyrrolidine (**3ah**):

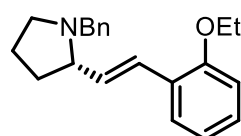

Yellow oil (81.5 mg, 88% yield), 93:7 *er*.  $[\alpha]_D^{20} = +15.3$  (*c* 0.66,  $\text{CHCl}_3$ );  $^1\text{H NMR}$  (400 MHz,  $\text{CDCl}_3$ )  $\delta$  7.53 (d,  $J = 7.6$  Hz, 1H), 7.37 (d,  $J = 7.5$  Hz, 2H), 7.35 – 7.30 (m, 2H), 7.28 – 7.19 (m, 2H), 6.96 (dd,  $J = 16.3, 9.3$  Hz, 2H), 6.88 (d,  $J = 8.2$  Hz, 1H), 6.25 (dd,  $J = 16.0, 8.3$  Hz, 1H), 4.14 (d,  $J = 13.2$  Hz, 1H), 4.09 (dd,  $J = 14.1, 7.1$  Hz, 2H), 3.20 (d,  $J = 13.0$  Hz, 1H), 3.10 – 2.96 (m, 2H), 2.25 – 2.17 (m, 1H), 2.11 – 2.03 (m, 1H), 1.91 – 1.73 (m, 3H), 1.49 (t,  $J = 7.0$  Hz, 3H);  $^{13}\text{C NMR}$  (100 MHz,  $\text{CDCl}_3$ )  $\delta$  155.9, 139.5, 132.7, 129.1 (overlap), 128.2, 128.0, 126.6, 126.4, 126.2, 120.5, 112.0, 68.1, 63.8, 58.1, 53.2, 31.8, 22.1, 14.9. HRMS (ESI) calculated for  $\text{C}_{21}\text{H}_{26}\text{NO}$   $[(\text{M}+\text{H})^+]$ : 308.2009, found: 308.2006. HPLC (Daicel Chiralpak OD-H column, *n*-hexane/isopropanol = 90/10, flow rate 1.0 mL/min, 254 nm):  $t_R$  (major) = 3.9 min,  $t_R$  (minor) = 4.1 min.

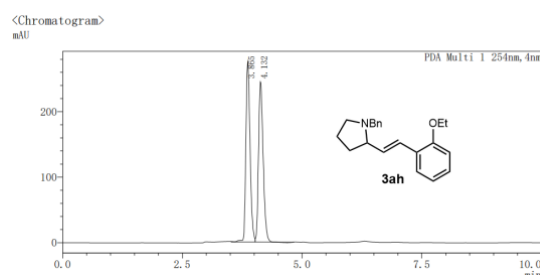

<Peak Table>

| No.   | Ret. Time (min) | Height (uAU) | Height% | Area (uAU*min) | Area%   |
|-------|-----------------|--------------|---------|----------------|---------|
| 1     | 3.865           | 275630       | 52.970  | 1682792        | 50.564  |
| 2     | 4.132           | 244719       | 47.030  | 1645249        | 49.436  |
| Total |                 | 520349       | 100.000 | 3328041        | 100.000 |

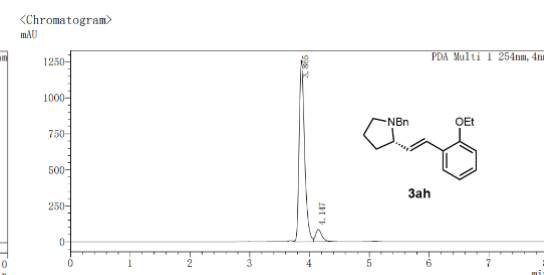

<Peak Table>

| No.   | Ret. Time (min) | Height (uAU) | Height% | Area (uAU*min) | Area%   |
|-------|-----------------|--------------|---------|----------------|---------|
| 1     | 3.865           | 1257508      | 93.592  | 7973247        | 92.897  |
| 2     | 4.147           | 86099        | 6.408   | 609628         | 7.103   |
| Total |                 | 1343608      | 100.000 | 8582875        | 100.000 |

### (*S,E*)-1-benzyl-2-(2-(benzyloxy)styryl)pyrrolidine (**3ai**):

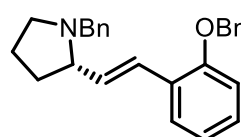

Yellow oil (72.8 mg, 66% yield), 92.5:7.5 *er*.  $[\alpha]_D^{20} = +66.3$  (*c* 0.61,  $\text{CHCl}_3$ );  $^1\text{H NMR}$  (400 MHz,  $\text{CDCl}_3$ )  $\delta$  7.57 (dd,  $J = 7.6, 1.5$  Hz, 1H), 7.49 (d,  $J = 7.3$  Hz, 2H), 7.44 – 7.39 (m, 2H), 7.39 – 7.33

(m, 3H), 7.33 – 7.28 (m, 2H), 7.27 – 7.20 (m, 2H), 7.03 (d,  $J = 16.1$  Hz, 1H), 7.01 – 6.93 (m, 2H), 6.25 (dd,  $J = 16.0, 8.4$  Hz, 1H), 5.15 (s, 2H), 4.13 (d,  $J = 13.0$  Hz, 1H), 3.20 (d,  $J = 13.0$  Hz, 1H), 3.10 – 2.97 (m, 2H), 2.26 – 2.16 (m, 1H), 2.08 – 2.02 (m, 1H), 1.90 – 1.72 (m, 3H);  $^{13}\text{C}$  NMR (100 MHz,  $\text{CDCl}_3$ )  $\delta$  155.6, 139.4, 137.2, 133.1, 129.1, 128.5, 128.3, 128.0, 127.8 (overlap), 127.2, 126.7, 126.6, 126.3, 121.0, 112.5, 70.3, 68.0, 58.1, 53.2, 31.8, 22.1. HRMS (ESI) calculated for  $\text{C}_{26}\text{H}_{28}\text{NO}$  [(M+H) $^+$ ]: 370.2165, found: 370.2164. HPLC (Daicel Chiralpak OD-H column, *n*-hexane/isopropanol = 90/10, flow rate 1.0 mL/min, 254 nm):  $t_{\text{R}}$  (major) = 5.2 min,  $t_{\text{R}}$  (minor) = 6.0 min.

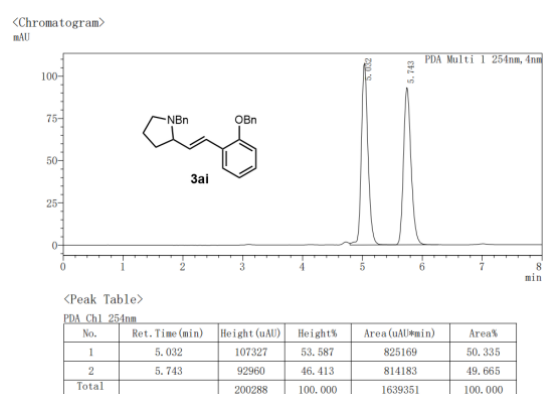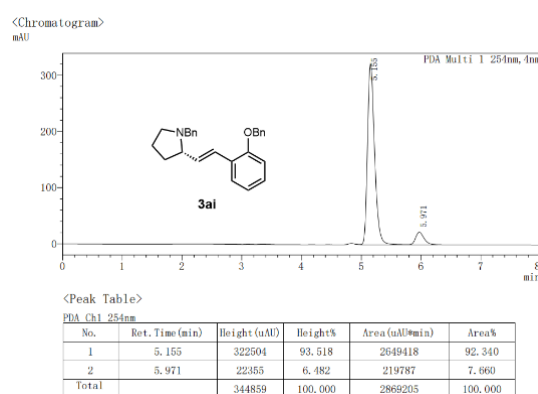

**(*S,E*)-2-(2-([1,1'-biphenyl]-2-yl)vinyl)-1-benzylpyrrolidine (3aj):**

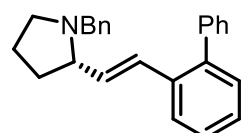

Yellow oil (82.7 mg, 81% yield), 96:4 *er*.  $[\alpha]_{\text{D}}^{20} = +118.0$  ( $c$  0.52,  $\text{CHCl}_3$ );  $^1\text{H}$  NMR (400 MHz,  $\text{CDCl}_3$ )  $\delta$  7.67 (d,  $J = 7.3$  Hz, 1H), 7.46 – 7.36 (m, 6H), 7.35 – 7.28 (m, 6H), 7.27 – 7.23 (m, 1H), 6.59 (d,  $J = 15.8$  Hz, 1H), 6.16 (dd,  $J = 15.8, 8.3$  Hz, 1H), 4.05 (d,  $J = 13.0$  Hz, 1H), 3.17 (d,  $J = 13.0$  Hz, 1H), 2.98 (t,  $J = 7.7$  Hz, 1H), 2.94 – 2.84 (m, 1H), 2.19 – 2.12 (m, 1H), 2.05 – 1.93 (m, 1H), 1.86 – 1.69 (m, 3H);  $^{13}\text{C}$  NMR (100 MHz,  $\text{CDCl}_3$ )  $\delta$  141.0, 140.6, 139.2, 135.3, 133.5, 130.6, 130.1, 129.8, 129.0, 128.1, 128.0, 127.4, 127.2, 126.9, 126.7, 126.2, 67.6, 58.0, 53.1, 31.7, 22.1. HRMS (ESI) calculated for  $\text{C}_{25}\text{H}_{26}\text{N}$  [(M+H) $^+$ ]: 340.2060, found: 340.2064. HPLC (Daicel Chiralpak OD-H+OD-H column, *n*-hexane/isopropanol = 99/1, flow rate 0.5 mL/min, 254 nm):  $t_{\text{R}}$  (minor) = 21.3 min,  $t_{\text{R}}$  (major) = 23.2 min.

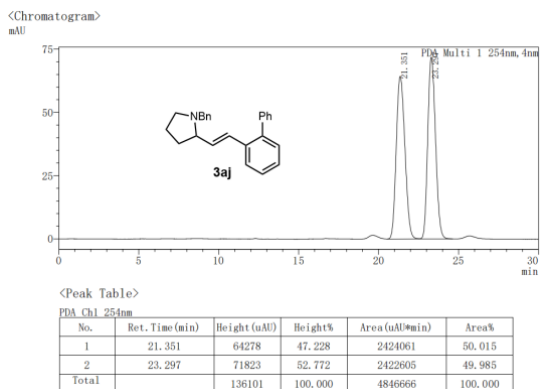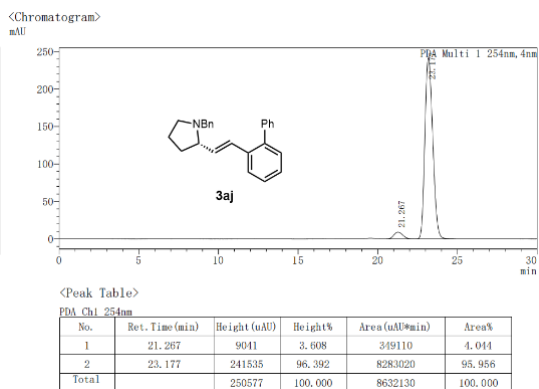

**(*S,E*)-1-benzyl-2-(3-bromostyryl)pyrrolidine (3ak):**

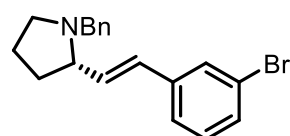

Yellow oil (76.6 mg, 75% yield), 92:8 *er*.  $[\alpha]_D^{20} = +50.2$  (*c* 0.55,  $\text{CHCl}_3$ );  $^1\text{H NMR}$  (400 MHz,  $\text{CDCl}_3$ )  $\delta$  7.55 – 7.51 (m, 1H), 7.38 – 7.33 (m, 1H), 7.32 – 7.30 (m, 4H), 7.30 – 7.28 (m, 1H), 7.26 – 7.20 (m, 1H), 7.21 – 7.14 (m, 1H), 6.48 (d,  $J = 15.8$  Hz, 1H), 6.20 (dd,  $J = 15.8, 8.2$  Hz, 1H), 4.03 (d,  $J = 13.0$  Hz, 1H), 3.18 (d,  $J = 13.0$  Hz, 1H), 3.05 – 2.95 (m, 2H), 2.24 – 2.13 (m, 1H), 2.08 – 1.98 (m, 1H), 1.86 – 1.72 (m, 3H);  $^{13}\text{C NMR}$  (100 MHz,  $\text{CDCl}_3$ )  $\delta$  139.3, 139.2, 134.4, 130.1, 130.0, 129.9, 129.2, 128.9, 128.1, 126.8, 124.9, 122.7, 67.6, 58.3, 53.4, 31.8, 22.2. HRMS (ESI) calculated for  $\text{C}_{19}\text{H}_{21}\text{BrN}$   $[(\text{M}+\text{H})^+]$ : 342.0852, found: 342.0844. HPLC (Daicel Chiralpak AD-H column, *n*-hexane/isopropanol = 90/10, flow rate 1.0 mL/min, 254 nm):  $t_R$  (major) = 3.7 min,  $t_R$  (minor) = 4.2 min.

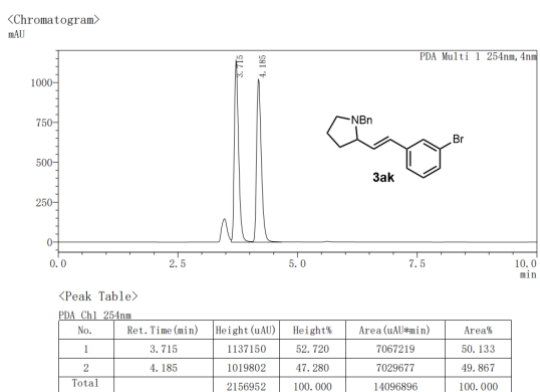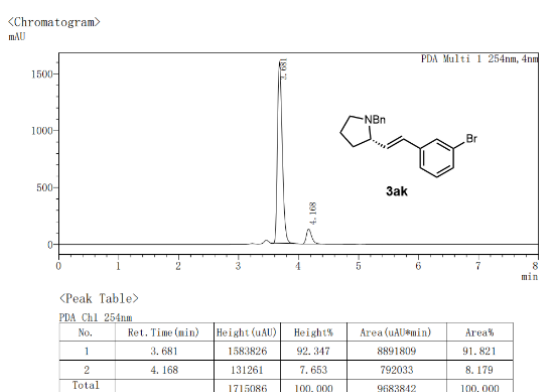

**(*S,E*)-1-benzyl-2-(3-methoxystyryl)pyrrolidine (3al):**

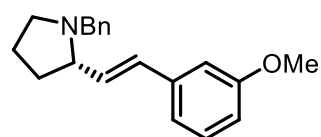

Yellow oil (78.6 mg, 89% yield), 93.5:6.5 *er*.  $[\alpha]_D^{20} = -21.3$  (*c* 0.67,  $\text{CHCl}_3$ );  $^1\text{H NMR}$  (400 MHz,  $\text{CDCl}_3$ )  $\delta$  7.35 – 7.27 (m, 4H), 7.26 – 7.19 (m, 2H), 7.00 (d,  $J = 7.7$  Hz, 1H), 6.97

– 6.94 (m, 1H), 6.80 (dd,  $J = 8.1, 2.3$  Hz, 1H), 6.54 (d,  $J = 15.8$  Hz, 1H), 6.21 (dd,  $J = 15.8, 8.3$  Hz, 1H), 4.08 (d,  $J = 13.0$  Hz, 1H), 3.82 (s, 3H), 3.16 (d,  $J = 13.0$  Hz, 1H), 3.05 – 2.95 (m, 2H), 2.23 – 2.14 (m, 1H), 2.07 – 2.00 (m, 1H), 1.89 – 1.70 (m, 3H);  $^{13}\text{C}$  NMR (100 MHz,  $\text{CDCl}_3$ )  $\delta$  159.8, 139.3, 138.6, 132.9, 131.5, 129.5, 129.0, 128.1, 126.7, 119.0, 113.1, 111.4, 67.8, 58.3, 55.2, 53.3, 31.8, 22.2. HRMS (ESI) calculated for  $\text{C}_{20}\text{H}_{24}\text{NO}$  [(M+H) $^+$ ]: 294.1852, found: 294.1853. HPLC (Daicel Chiralpak OD-H column, *n*-hexane/isopropanol = 90/10, flow rate 1.0 mL/min, 254 nm):  $t_{\text{R}}$  (minor) = 4.2 min,  $t_{\text{R}}$  (major) = 5.1 min.

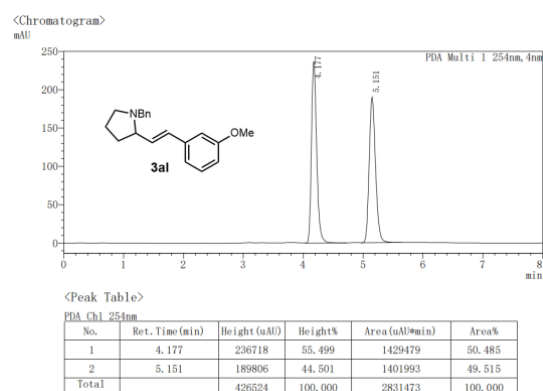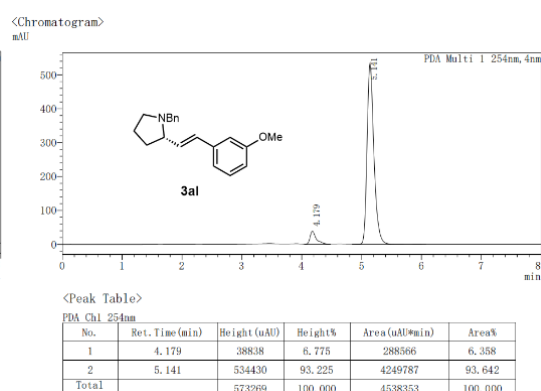

**(*S,E*)-1-benzyl-2-(3,5-dimethoxystyryl)pyrrolidine (3am):**

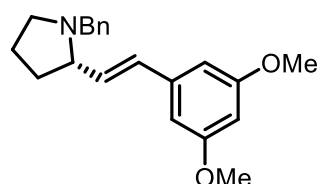

Yellow oil (77.1 mg, 80% yield), 94:6 *er*.  $[\alpha]_{\text{D}}^{20} = -41.9$  ( $c$  0.93,  $\text{CHCl}_3$ );  $^1\text{H}$  NMR (400 MHz,  $\text{CDCl}_3$ )  $\delta$  7.38 – 7.28 (m, 4H), 7.26 – 7.21 (m, 1H), 6.59 (s, 2H), 6.51 (d,  $J = 15.8$  Hz, 1H), 6.39 (s, 1H), 6.21 (dd,  $J = 15.7, 8.3$  Hz, 1H), 4.08 (d,  $J = 13.0$  Hz, 1H), 3.82 (s, 6H), 3.18 (d,  $J = 13.0$  Hz, 1H), 3.06 – 2.94 (m, 2H), 2.23 – 2.15 (m, 1H), 2.09 – 2.00 (m, 1H), 1.89 – 1.70 (m, 3H);  $^{13}\text{C}$  NMR (100 MHz,  $\text{CDCl}_3$ )  $\delta$  160.9, 139.2, 139.1, 133.1, 131.6, 129.0, 128.1, 126.7, 104.3, 100.0, 67.7, 58.3, 55.6, 53.3, 31.8, 22.1. HRMS (ESI) calculated for  $\text{C}_{21}\text{H}_{26}\text{NO}_2$  [(M+H) $^+$ ]: 324.1958, found: 324.1950. HPLC (Daicel Chiralpak AD-H column, *n*-hexane/isopropanol = 90/10, flow rate 1.0 mL/min, 254 nm):  $t_{\text{R}}$  (major) = 6.0 min,  $t_{\text{R}}$  (minor) = 6.9 min.

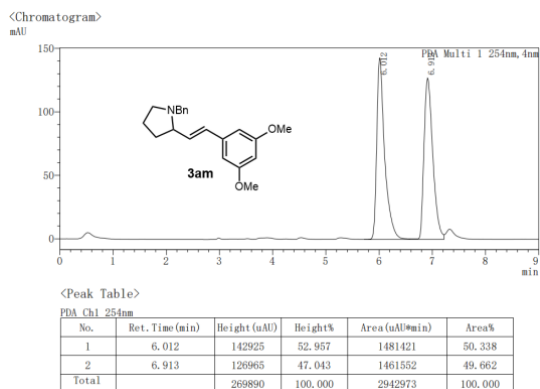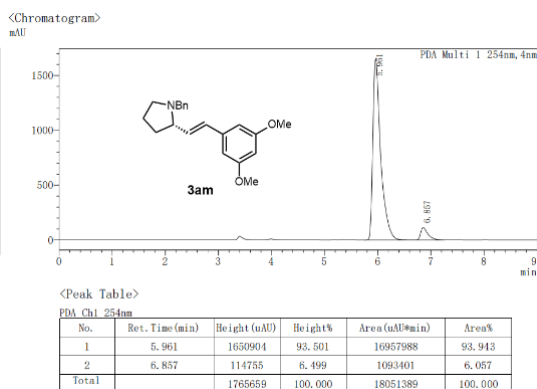

**(*S,E*)-1-benzyl-2-(2,5-dimethoxystyryl)pyrrolidine (3an):**

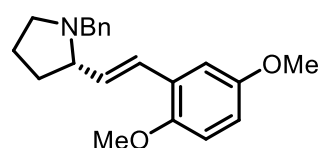

Yellow oil (73.2 mg, 75% yield), 92.5:7.5 *er*.  $[\alpha]_D^{20} = +20.6$  (*c* 0.51,  $\text{CHCl}_3$ );  $^1\text{H NMR}$  (400 MHz,  $\text{CDCl}_3$ )  $\delta$  7.37 – 7.27 (m, 4H), 7.26 – 7.20 (m, 1H), 7.08 – 7.05 (m, 1H), 6.90 (d,  $J = 16.0$  Hz, 1H), 6.84 – 6.75 (m, 2H), 6.20 (dd,  $J = 16.0, 8.4$  Hz, 1H), 4.09 (d,  $J = 13.0$  Hz, 1H), 3.82 (s, 3H), 3.80 (s, 3H), 3.16 (d,  $J = 13.0$  Hz, 1H), 3.07 – 2.95 (m, 2H), 2.24 – 2.15 (m, 1H), 2.09 – 2.00 (m, 1H), 1.87 – 1.71 (m, 3H);  $^{13}\text{C NMR}$  (100 MHz,  $\text{CDCl}_3$ )  $\delta$  153.7, 151.0, 139.5, 133.3, 129.0, 128.1, 126.9, 126.7, 126.1, 113.6, 112.3, 111.8, 68.2, 58.3, 56.2, 55.7, 53.4, 31.8, 22.1. HRMS (ESI) calculated for  $\text{C}_{21}\text{H}_{26}\text{NO}_2$   $[(\text{M}+\text{H})^+]$ : 324.1958, found: 324.1954. HPLC (Daicel Chiralpak AD-H column, *n*-hexane/isopropanol = 90/10, flow rate 1.0 mL/min, 254 nm):  $t_R$  (major) = 5.1 min,  $t_R$  (minor) = 6.7 min.

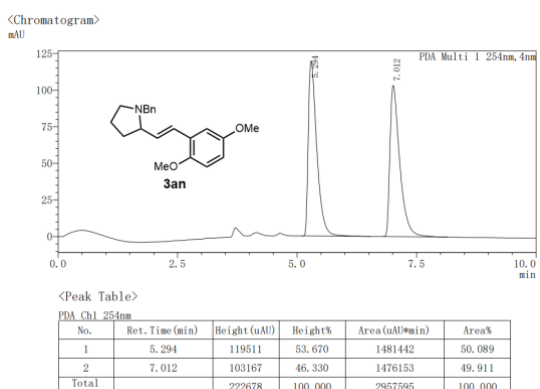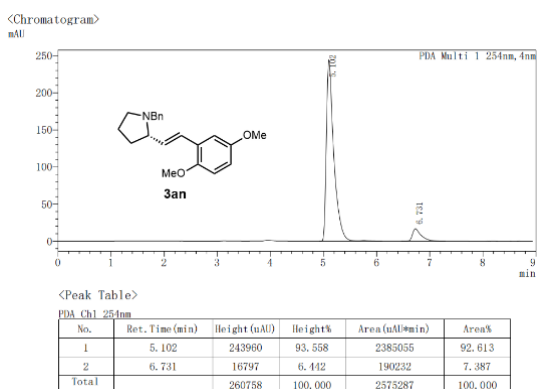

**(*S,E*)-1-benzyl-2-(2,4,6-trimethylstyryl)pyrrolidine (3ao):**

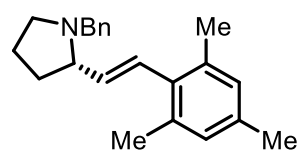

Yellow oil (52.6 mg, 57% yield, 7:1 *E/Z*), 93:7 *er*.  $[\alpha]_D^{20} = +68.0$  (*c* 0.49,  $\text{CHCl}_3$ );  $^1\text{H NMR}$  (400 MHz,  $\text{CDCl}_3$ ) *E* isomer:  $\delta$  7.37 – 7.27 (m, 4H), 7.26 – 7.22 (m, 1H), 6.89 (s, 2H), 6.54

(d,  $J = 16.2$  Hz, 1H), 5.69 (dd,  $J = 16.2, 8.3$  Hz, 1H), 4.21 (d,  $J = 12.8$  Hz, 1H), 3.18 (d,  $J = 12.8$  Hz, 1H), 3.05 – 2.95 (m, 2H), 2.32 (s, 6H), 2.29 (s, 3H), 2.11 – 2.04 (m, 1H), 2.00 – 1.87 (m, 1H), 1.84 – 1.72 (m, 3H);  $^{13}\text{C}$  NMR (100 MHz,  $\text{CDCl}_3$ )  $\delta$  139.4, 137.3, 136.0, 135.8, 134.0, 129.3, 129.1, 128.5, 128.2, 126.8, 68.4, 58.9, 53.2, 31.8, 22.1, 21.0, 20.9. HRMS (ESI) calculated for  $\text{C}_{22}\text{H}_{28}\text{N}$  [(M+H) $^+$ ]: 306.2216, found: 306.2210. HPLC (Daicel Chiralpak OJ-H column, *n*-hexane/isopropanol = 99/1, flow rate 0.5 mL/min, 254 nm):  $t_{\text{R}}$  (minor) = 8.9 min,  $t_{\text{R}}$  (major) = 10.1 min.

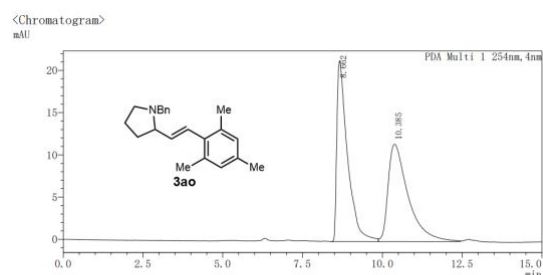

<Peak Table>

| PDA Chl 254nm |                 |              |         |                |         |
|---------------|-----------------|--------------|---------|----------------|---------|
| No.           | Ret. Time (min) | Height (mAU) | Height% | Area (mAU*min) | Area%   |
| 1             | 8.862           | 21387        | 64.931  | 501547         | 49.762  |
| 2             | 10.385          | 11551        | 35.069  | 506352         | 50.238  |
| Total         |                 | 32939        | 100.000 | 1007898        | 100.000 |

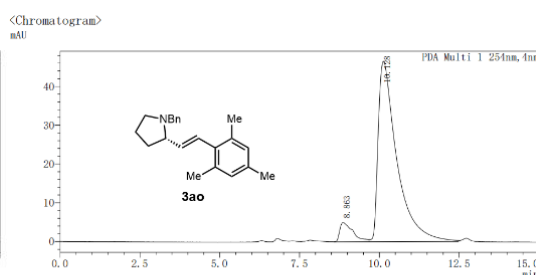

<Peak Table>

| PDA Chl 254nm |                 |              |         |                |         |
|---------------|-----------------|--------------|---------|----------------|---------|
| No.           | Ret. Time (min) | Height (mAU) | Height% | Area (mAU*min) | Area%   |
| 1             | 8.863           | 4980         | 9.671   | 142506         | 6.989   |
| 2             | 10.128          | 46512        | 90.329  | 1896600        | 93.011  |
| Total         |                 | 51492        | 100.000 | 2039107        | 100.000 |

**(*S,E*)-1-benzyl-2-(3,4,5-trimethoxystyryl)pyrrolidine (3ap):**

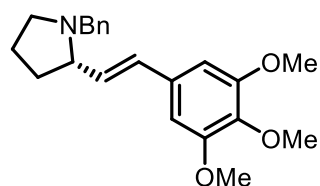

Yellow oil (83.2 mg, 79% yield), 95:5 *er*.  $[\alpha]_{\text{D}}^{20} = +4.1$  ( $c$  0.55,  $\text{CHCl}_3$ );  $^1\text{H}$  NMR (400 MHz,  $\text{CDCl}_3$ )  $\delta$  7.36 – 7.27 (m, 4H), 7.25 – 7.18 (m, 1H), 6.63 (s, 2H), 6.49 (d,  $J = 15.7$  Hz, 1H), 6.11 (dd,  $J = 15.7, 8.3$  Hz, 1H), 4.07 (d,  $J = 13.0$  Hz, 1H), 3.88 (s, 6H), 3.85 (s, 3H), 3.17 (d,  $J = 13.0$  Hz, 1H), 3.05 – 2.94 (m, 2H), 2.22 – 2.14 (m, 1H), 2.08 – 2.00 (m, 1H), 1.86 – 1.70 (m, 3H);  $^{13}\text{C}$  NMR (100 MHz,  $\text{CDCl}_3$ )  $\delta$  153.2, 139.2, 137.6, 132.8, 132.1, 131.4, 128.9, 128.1, 126.7, 103.3, 67.7, 60.8, 58.3, 56.0, 53.4, 31.8, 22.1. HRMS (ESI) calculated for  $\text{C}_{22}\text{H}_{28}\text{NO}_3$  [(M+H) $^+$ ]: 354.2064, found: 354.2061. HPLC (Daicel Chiralpak AD-H column, *n*-hexane/isopropanol = 90/10, flow rate 1.0 mL/min, 254 nm):  $t_{\text{R}}$  (major) = 7.2 min,  $t_{\text{R}}$  (minor) = 12.9 min.

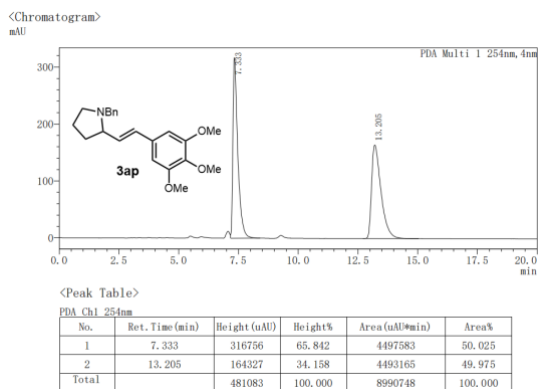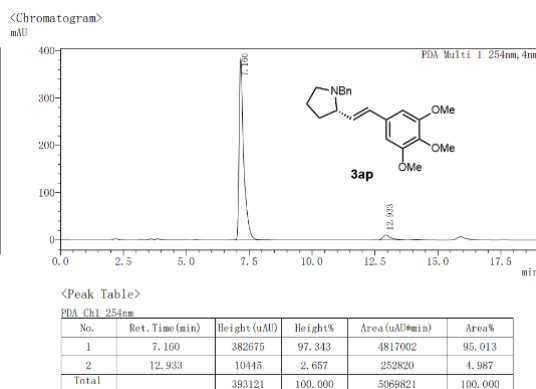

**(*S,E*)-1-benzyl-2-(3,4,5-trifluorostyryl)pyrrolidine (3aq):**

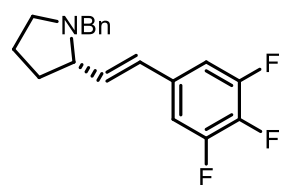

Yellow oil (81.1 mg, 85% yield), 93:7 *er*.  $[\alpha]_D^{20} = +59.5$  (*c* 0.44, CHCl<sub>3</sub>); <sup>1</sup>H NMR (400 MHz, CDCl<sub>3</sub>) δ 7.32 (s, 2H), 7.32 – 7.28 (m, 2H), 7.26 – 7.18 (m, 1H), 7.08 – 6.86 (m, 2H), 6.40 (d, *J* = 15.8 Hz, 1H), 6.12 (dd, *J* = 15.8, 8.1 Hz, 1H), 3.99 (d, *J* = 13.0

Hz, 1H), 3.22 (d, *J* = 13.0 Hz, 1H), 3.08 – 2.94 (m, 2H), 2.27 – 2.15 (m, 1H), 2.07 – 2.01 (m, 1H), 1.90 – 1.67 (m, 3H); <sup>13</sup>C NMR (100 MHz, CDCl<sub>3</sub>) δ 151.3 (ddd, *J* = 247.5, 10.0, 4.2 Hz), 139.3, 138.8 (dt, *J* = 249.5, 15.1 Hz), 135.5, 133.5 (td, *J* = 7.5, 4.4 Hz), 128.8, 128.5 (d, *J* = 2.1 Hz), 128.2, 126.8, 109.9 (dd, *J* = 15.8, 5.7 Hz), 67.3, 58.5, 53.5, 31.8, 22.3; <sup>19</sup>F NMR (377 MHz, CDCl<sub>3</sub>) δ -134.9, -162.2. HRMS (ESI) calculated for C<sub>19</sub>H<sub>19</sub>F<sub>3</sub>N [(M+H)<sup>+</sup>]: 318.1464, found: 318.1457. HPLC (Daicel Chiralpak OD-H column, *n*-hexane/isopropanol = 95/5, flow rate 1.0 mL/min, 254 nm): *t<sub>R</sub>* (minor) = 3.8 min, *t<sub>R</sub>* (major) = 4.2 min.

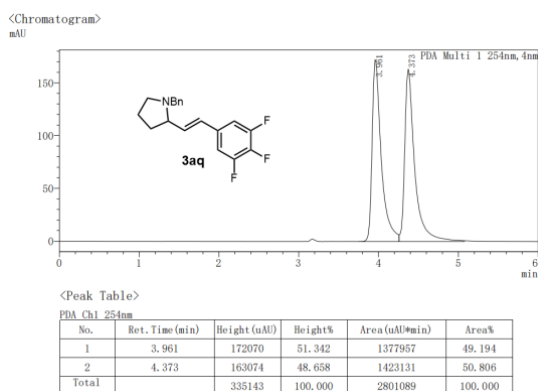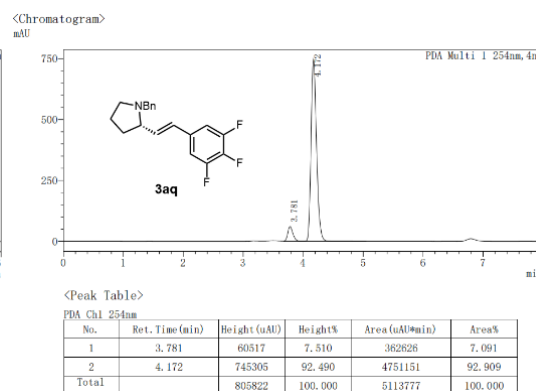

**(*S,E*)-1-benzyl-2-(2-(naphthalen-1-yl)vinyl)pyrrolidine (3ar):**

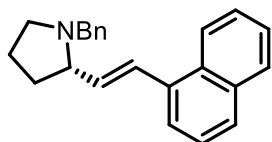

Yellow oil (81.7 mg, 87% yield), 95:5 *er.*  $[\alpha]_D^{20} = +48.9$  (*c* 0.64,  $\text{CHCl}_3$ );  $^1\text{H NMR}$  (400 MHz,  $\text{CDCl}_3$ )  $\delta$  8.18 (d,  $J = 8.0$  Hz, 1H), 7.89 (d,  $J = 7.7$  Hz, 1H), 7.81 (d,  $J = 8.2$  Hz, 1H), 7.66 (d,  $J = 7.1$  Hz, 1H), 7.58 – 7.47 (m, 3H), 7.41 (d,  $J = 7.5$  Hz, 2H), 7.39 – 7.33 (m, 3H), 7.29 (d,  $J = 7.0$  Hz, 1H), 6.29 (dd,  $J = 15.5, 8.3$  Hz, 1H), 4.21 (d,  $J = 13.0$  Hz, 1H), 3.29 (d,  $J = 13.0$  Hz, 1H), 3.23 – 3.13 (m, 1H), 3.08 (t,  $J = 8.1$  Hz, 1H), 2.33 – 2.23 (m, 1H), 2.20 – 2.10 (m, 1H), 1.95 – 1.79 (m, 3H);  $^{13}\text{C NMR}$  (100 MHz,  $\text{CDCl}_3$ )  $\delta$  139.5, 135.9, 134.8, 133.6, 131.1, 129.0, 128.7, 128.5, 128.1, 127.7, 126.7, 125.9, 125.7, 125.6, 123.9, 123.8, 68.0, 58.4, 53.5, 31.9, 22.2. HRMS (ESI) calculated for  $\text{C}_{23}\text{H}_{24}\text{N}$   $[(\text{M}+\text{H})^+]$ : 314.1903, found: 314.1898. HPLC (Daicel Chiralpak OD-H column, *n*-hexane/isopropanol = 90/10, flow rate 1.0 mL/min, 254 nm):  $t_R$  (minor) = 4.6 min,  $t_R$  (major) = 5.1 min.

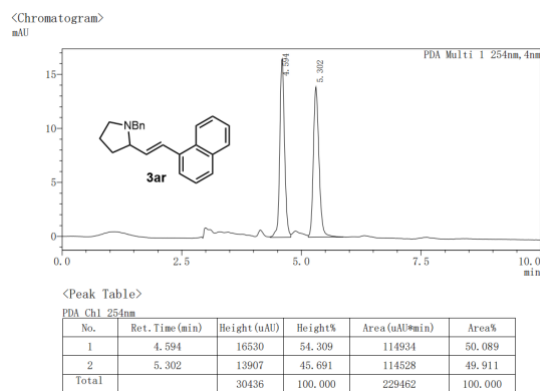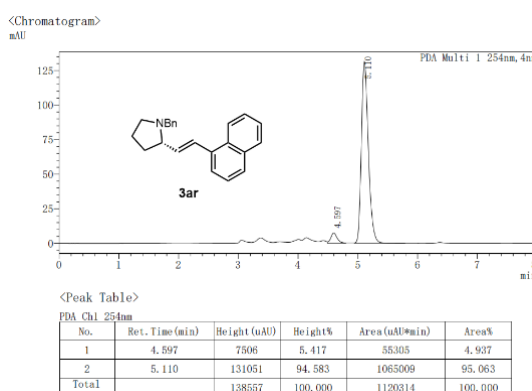

### (*S,E*)-1-benzyl-2-(2-(naphthalen-2-yl)vinyl)pyrrolidine (**3as**):

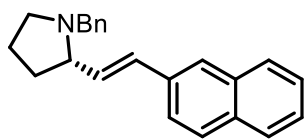

Yellow solid (70.8 mg, 75% yield), 93.5:6.5 *er.* m.p. 109-110 °C;  $[\alpha]_D^{20} = +28.4$  (*c* 0.55,  $\text{CHCl}_3$ );  $^1\text{H NMR}$  (400 MHz,  $\text{CDCl}_3$ )  $\delta$  7.85 – 7.76 (m, 3H), 7.74 (s, 1H), 7.64 (dd,  $J = 8.6, 1.5$  Hz, 1H), 7.50 – 7.41 (m, 2H), 7.38 – 7.28 (m, 4H), 7.26 – 7.20 (m, 1H), 6.74 (d,  $J = 15.8$  Hz, 1H), 6.33 (dd,  $J = 15.8, 8.3$  Hz, 1H), 4.12 (d,  $J = 13.0$  Hz, 1H), 3.20 (d,  $J = 13.0$  Hz, 1H), 3.11 – 2.98 (m, 2H), 2.28 – 2.16 (m, 1H), 2.11 – 2.03 (m, 1H), 1.87 – 1.77 (m, 3H);  $^{13}\text{C NMR}$  (100 MHz,  $\text{CDCl}_3$ )  $\delta$  139.4, 134.6, 133.6, 133.1, 132.9, 131.7, 129.0, 128.1, 127.9, 127.6, 126.8, 126.2, 126.0, 125.7, 123.7, 68.0, 58.4, 53.4, 31.9, 22.2. HRMS (ESI) calculated for  $\text{C}_{23}\text{H}_{24}\text{N}$   $[(\text{M}+\text{H})^+]$ : 314.1903, found: 314.1896.



HPLC (Daicel Chiralpak AD-H column, *n*-hexane/isopropanol = 90/10, flow rate 1.0 mL/min, 254 nm):  $t_R$  (major) = 4.6 min,  $t_R$  (minor) = 5.4 min.

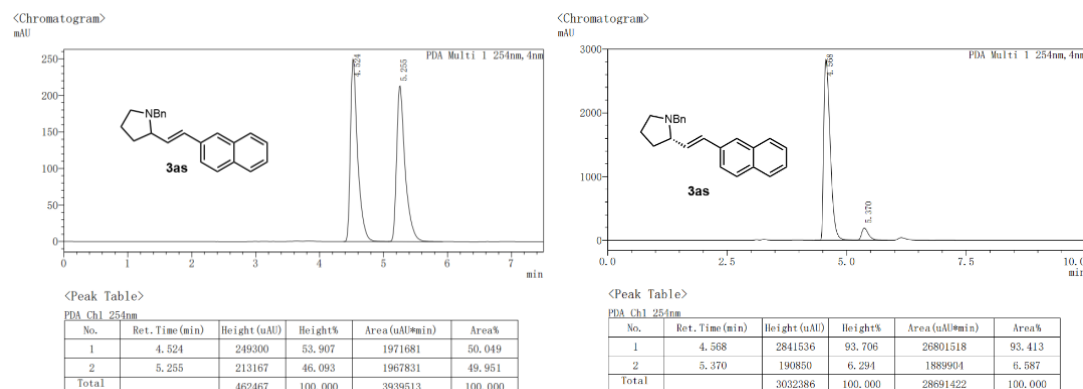

**(*S,E*)-1-benzyl-2-(2-(furan-2-yl)vinyl)pyrrolidine (3at):**

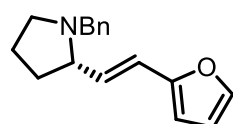

Yellow solid (34.0 mg, 45% yield), 96.5:3.5 *er.* m.p. 43-44 °C;  $[\alpha]_D^{20} = -21.0$  (*c* 0.63, CHCl<sub>3</sub>); <sup>1</sup>H NMR (400 MHz, CDCl<sub>3</sub>)  $\delta$  7.38 – 7.34 (m, 1H), 7.34 – 7.25 (m, 4H), 7.25 – 7.20 (m, 1H), 6.41 (d, *J* = 15.8 Hz, 1H), 6.37 (dd, *J* = 3.1, 1.9 Hz, 1H), 6.23 (d, *J* = 3.2 Hz, 1H), 6.15 (dd, *J* = 15.8, 8.3 Hz, 1H), 4.08 (d, *J* = 13.0 Hz, 1H), 3.14 (d, *J* = 13.0 Hz, 1H), 3.03 – 2.91 (m, 2H), 2.22 – 2.13 (m, 1H), 2.06 – 1.98 (m, 1H), 1.85 – 1.68 (m, 3H); <sup>13</sup>C NMR (100 MHz, CDCl<sub>3</sub>)  $\delta$  152.8, 141.7, 139.5, 131.4, 128.9, 128.1, 126.7, 120.0, 111.2, 107.1, 67.5, 58.3, 53.3, 31.9, 22.2. HRMS (ESI) calculated for C<sub>17</sub>H<sub>20</sub>NO [(M+H)<sup>+</sup>]: 254.1539, found: 254.1537. HPLC (Daicel Chiralpak AD-H column, *n*-hexane/isopropanol = 90/10, flow rate 1.0 mL/min, 254 nm):  $t_R$  (major) = 3.6 min,  $t_R$  (minor) = 4.5 min.

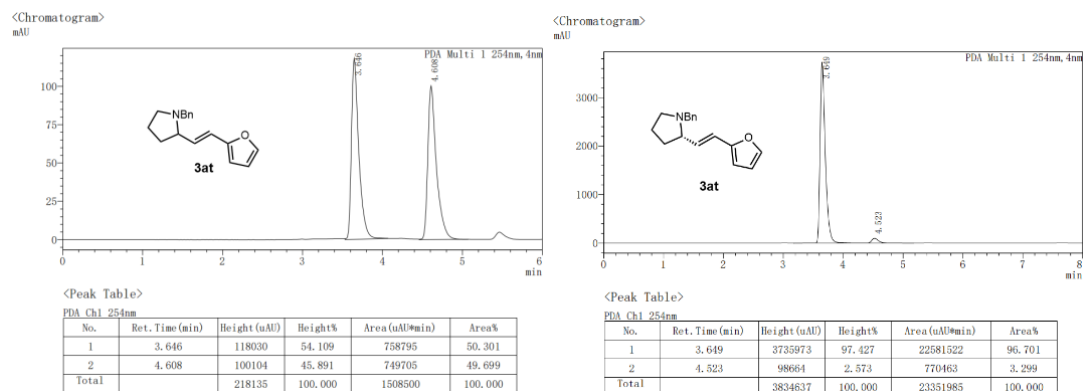

**(*S,E*)-2-(2-(benzofuran-2-yl)vinyl)-1-benzylpyrrolidine (3au):**

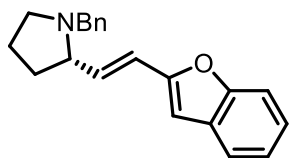

Yellow solid (62.9 mg, 69% yield) with 92.5:7.5 *er.* m.p. 78-79 °C;  $[\alpha]_D^{20} = +89.7$  (*c* 0.27, CHCl<sub>3</sub>); <sup>1</sup>H NMR (400 MHz, CDCl<sub>3</sub>) δ 7.54 (dd, *J* = 7.6, 0.6 Hz, 1H), 7.48 (d, *J* = 8.1 Hz, 1H), 7.39 – 7.32 (m, 4H), 7.30 – 7.20 (m, 3H), 6.58 (s, 1H), 6.57 (d, *J* = 15.7 Hz, 2H), 6.50 (dd, *J* = 15.8, 7.3 Hz, 1H), 4.12 (d, *J* = 13.0 Hz, 1H), 3.21 (d, *J* = 13.0 Hz, 1H), 3.12 – 2.98 (m, 2H), 2.27 – 2.18 (m, 1H), 2.13 – 2.03 (m, 1H), 1.91 – 1.74 (m, 3H); <sup>13</sup>C NMR (100 MHz, CDCl<sub>3</sub>) δ 154.7, 154.6, 139.4, 135.1, 128.9, 128.8, 128.1, 126.7, 124.2, 122.7, 120.7, 119.8, 110.8, 103.7, 67.3, 58.4, 53.3, 31.9, 22.3. HRMS (ESI) calculated for C<sub>21</sub>H<sub>22</sub>NO [(M+H)<sup>+</sup>]: 304.1696, found: 304.1688. HPLC (Daicel Chiralpak AD-H column, *n*-hexane/isopropanol = 90/10, flow rate 1.0 mL/min, 254 nm): t<sub>R</sub> (major) = 4.0 min, t<sub>R</sub> (minor) = 4.5 min.

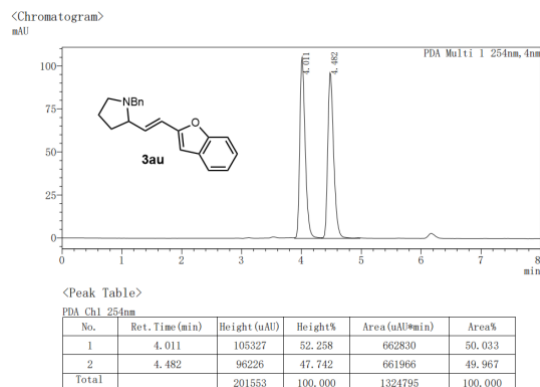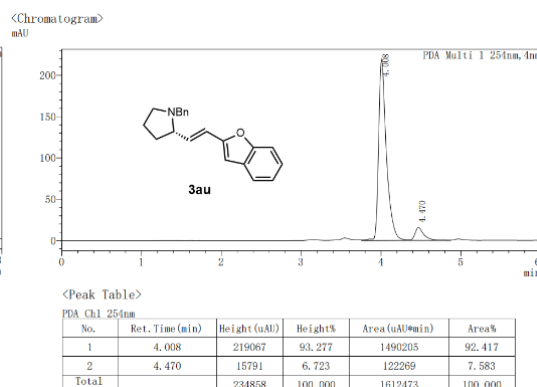

**(*S,E*)-1-benzyl-2-(2-(2,3-dihydrobenzo[*b*][1,4]dioxin-6-yl)vinyl)pyrrolidine (3av):**

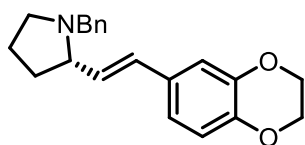

Yellow oil (58.1 mg, 60% yield), 93.5:6.5 *er.*  $[\alpha]_D^{20} = -7.7$  (*c* 0.73, CHCl<sub>3</sub>); <sup>1</sup>H NMR (400 MHz, CDCl<sub>3</sub>) δ 7.37 – 7.27 (m, 4H), 7.25 – 7.18 (m, 1H), 6.94 (s, 1H), 6.90 (d, *J* = 8.4 Hz, 1H), 6.82 (d, *J* = 8.3 Hz, 1H), 6.45 (d, *J* = 15.8 Hz, 1H), 6.05 (dd, *J* = 15.8, 8.3 Hz, 1H), 4.25 (s, 4H), 4.07 (d, *J* = 12.9 Hz, 1H), 3.13 (d, *J* = 12.9 Hz, 1H), 3.03 – 2.89 (m, 2H), 2.20 – 2.13 (m, 1H), 2.06 – 1.98 (m, 1H), 1.84 – 1.68 (m, 3H); <sup>13</sup>C NMR (100 MHz, CDCl<sub>3</sub>) δ 143.5, 143.0, 139.3, 131.1, 131.0, 130.9, 129.0, 128.1, 126.7, 119.7, 117.2, 114.8, 67.8, 64.4, 64.3, 58.2, 53.3, 31.8, 22.1. HRMS (ESI) calculated for C<sub>21</sub>H<sub>24</sub>NO<sub>2</sub> [(M+H)<sup>+</sup>]: 322.1802, found: 322.1796. HPLC (Daicel Chiralpak AD-H column, *n*-hexane/isopropanol = 90/10, flow rate 1.0 mL/min, 254 nm): t<sub>R</sub> (major) = 5.2 min, t<sub>R</sub> (minor) = 6.9 min.

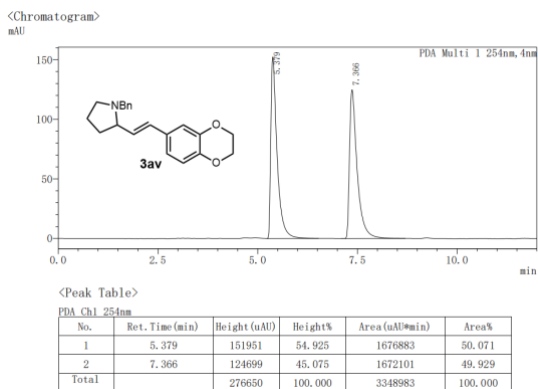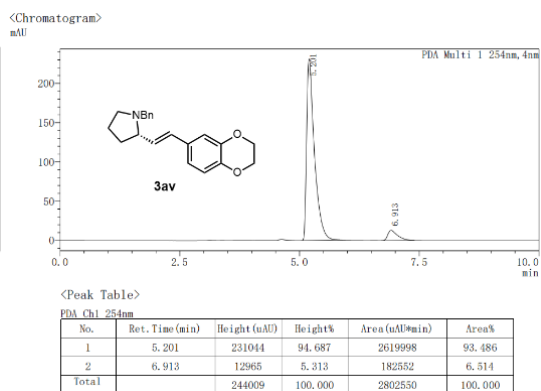

**(*S,E*)-1-benzyl-2-(2-(thiophen-2-yl)vinyl)pyrrolidine (3aw):**

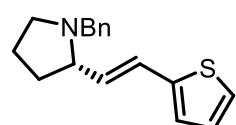

Yellow solid (63.7 mg, 79% yield), 93:7 *er.* m.p. 47–48 °C;  $[\alpha]_D^{20} = -110.1$  (*c* 0.98, CHCl<sub>3</sub>); <sup>1</sup>H NMR (400 MHz, CDCl<sub>3</sub>) δ 7.36 – 7.28 (m, 4H), 7.26 – 7.19 (m, 1H), 7.15 (d, *J* = 4.3 Hz, 1H), 7.02 – 6.91 (m, 2H), 6.71 (d, *J* = 15.7 Hz, 1H), 6.06 (dd, *J* = 15.6, 8.2 Hz, 1H), 4.09 (d, *J* = 13.0 Hz, 1H), 3.16 (d, *J* = 13.0 Hz, 1H), 3.03 – 2.92 (m, 2H), 2.23 – 2.14 (m, 1H), 2.08 – 1.98 (m, 1H), 1.88 – 1.71 (m, 3H); <sup>13</sup>C NMR (100 MHz, CDCl<sub>3</sub>) δ 142.4, 139.5, 132.5, 129.0, 128.2, 127.3, 126.8, 125.1, 124.7, 123.9, 67.6, 58.4, 53.4, 31.9, 22.2. HRMS (ESI) calculated for C<sub>17</sub>H<sub>20</sub>NS [(M+H)<sup>+</sup>]: 270.1311, found: 270.1310. HPLC (Daicel Chiralpak AD-H column, *n*-hexane/isopropanol = 90/10, flow rate 1.0 mL/min, 254 nm): *t*<sub>R</sub> (major) = 3.9 min, *t*<sub>R</sub> (minor) = 4.8 min.

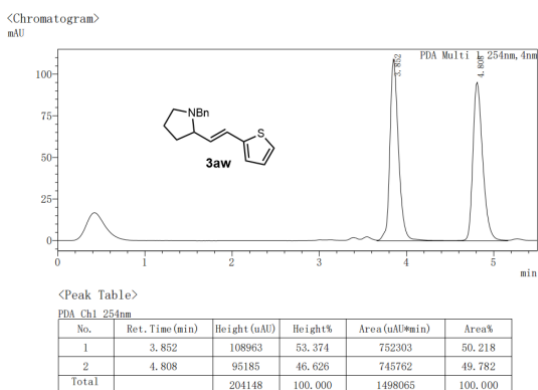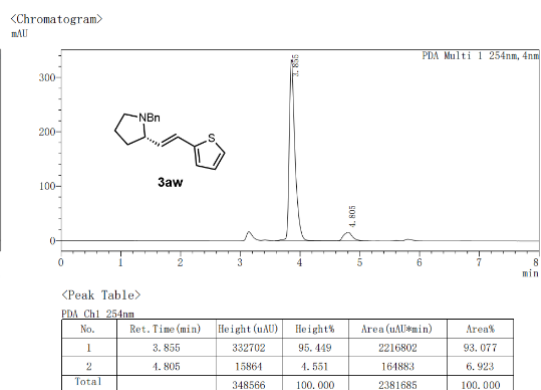

**(*S,E*)-1-(2-bromobenzyl)-2-styrylpyrrolidine (3ba):**

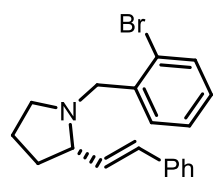

Yellow oil (86.7 mg, 85% yield), 91:9 *er.*  $[\alpha]_D^{20} = +4.7$  (*c* 0.60, CHCl<sub>3</sub>); <sup>1</sup>H NMR (400 MHz, CDCl<sub>3</sub>) δ 7.52 (d, *J* = 7.8 Hz, 2H), 7.40 (d, *J* = 7.7 Hz, 2H), 7.35 – 7.26 (m, 3H), 7.25 – 7.19 (m, 1H), 7.11 – 7.04 (m, 1H), 6.58 (d, *J* = 15.8 Hz, 1H), 6.20 (dd, *J* = 15.8, 8.3 Hz,

1H), 4.07 (d,  $J = 14.1$  Hz, 1H), 3.42 (d,  $J = 14.1$  Hz, 1H), 3.15 – 3.06 (m, 2H), 2.31 – 2.22 (m, 1H), 2.10 – 1.98 (m, 1H), 1.89 – 1.74 (m, 3H);  $^{13}\text{C}$  NMR (100 MHz,  $\text{CDCl}_3$ )  $\delta$  139.0, 137.1, 132.7, 132.6, 131.5, 130.8, 128.5, 128.1, 127.3, 127.1, 126.3, 124.2, 68.2, 57.5, 53.7, 31.9, 22.4. HRMS (ESI) calculated for  $\text{C}_{19}\text{H}_{21}\text{BrN}$  [(M+H) $^+$ ]: 342.0852, found: 342.0852. HPLC (Daicel Chiralpak OJ-H column, *n*-hexane/isopropanol = 99/1, flow rate 0.5 mL/min, 254 nm):  $t_{\text{R}}$  (minor) = 13.6 min,  $t_{\text{R}}$  (major) = 18.4 min.

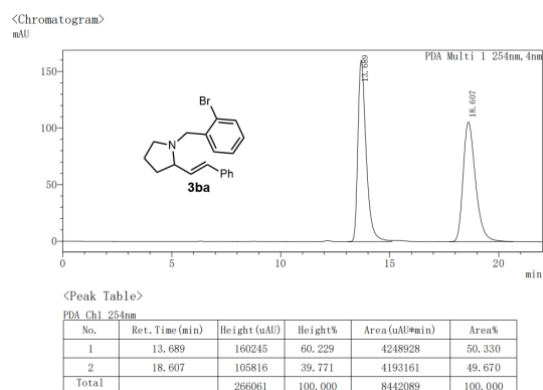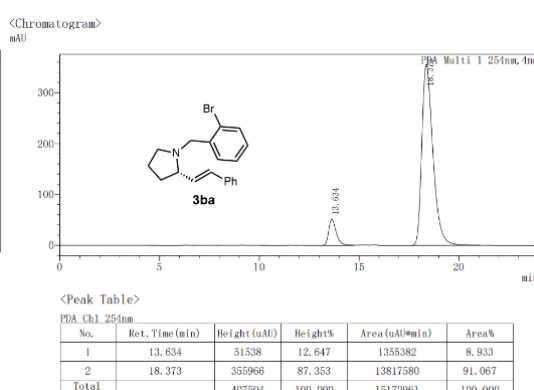

**(*S,E*)-1-(2-methylbenzyl)-2-styrylpyrrolidine (3ca):**

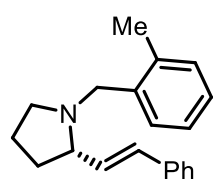

Orange oil (70.0 mg, 84% yield), 94:6 *er*.  $[\alpha]_{\text{D}}^{20} = -3.3$  ( $c$  0.68,  $\text{CHCl}_3$ );  $^1\text{H}$  NMR (400 MHz,  $\text{CDCl}_3$ )  $\delta$  7.45 (d,  $J = 7.7$  Hz, 2H), 7.40 – 7.33 (m, 3H), 7.29 (d,  $J = 7.1$  Hz, 1H), 7.22 – 7.14 (m, 3H), 6.62 (d,  $J = 15.8$  Hz, 1H), 6.25 (dd,  $J = 15.8, 8.4$  Hz, 1H), 4.11 (d,  $J = 13.1$  Hz, 1H), 3.14 (d,  $J = 13.1$  Hz, 1H), 3.10 – 2.99 (m, 2H), 2.40 (s, 3H), 2.27 – 2.18 (m, 1H), 2.13 – 2.02 (m, 1H), 1.91 – 1.75 (m, 3H);  $^{13}\text{C}$  NMR (100 MHz,  $\text{CDCl}_3$ )  $\delta$  137.9, 137.2, 136.8, 132.8, 131.5, 130.1, 129.4, 128.5, 127.2, 126.7, 126.3, 125.4, 68.5, 56.2, 53.8, 31.9, 22.3, 19.3. HRMS (ESI) calculated for  $\text{C}_{20}\text{H}_{24}\text{N}$  [(M+H) $^+$ ]: 278.1903, found: 278.1901. HPLC (Daicel Chiralpak OJ-H column, *n*-hexane/isopropanol = 99/1, flow rate 0.5 mL/min, 254 nm):  $t_{\text{R}}$  (minor) = 15.5 min,  $t_{\text{R}}$  (major) = 17.6 min.

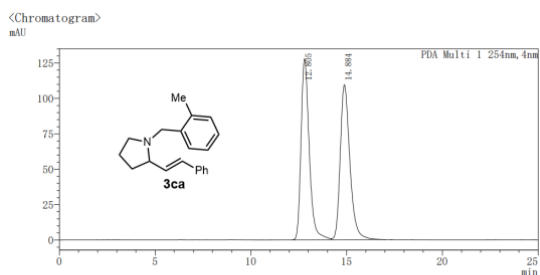

<Peak Table>

| No.   | Ret. Time (min) | Height (uAU) | Height% | Area (uAU*min) | Area%   |
|-------|-----------------|--------------|---------|----------------|---------|
| 1     | 12.805          | 127858       | 53.885  | 3818599        | 49.884  |
| 2     | 14.884          | 109423       | 46.115  | 3836391        | 50.116  |
| Total |                 | 237281       | 100.000 | 7654990        | 100.000 |

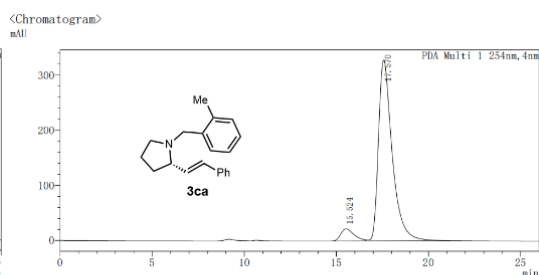

<Peak Table>

| No.   | Ret. Time (min) | Height (uAU) | Height% | Area (uAU*min) | Area%   |
|-------|-----------------|--------------|---------|----------------|---------|
| 1     | 15.524          | 22127        | 6.317   | 1112859        | 6.138   |
| 2     | 17.570          | 328130       | 93.683  | 17016528       | 93.862  |
| Total |                 | 350258       | 100.000 | 18129387       | 100.000 |

### (*S,E*)-1-(3-fluorobenzyl)-2-styrylpyrrolidine (**3da**):

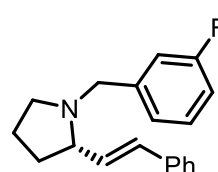

Yellow solid (78.1 mg, 93% yield), 93:7 *er.* m.p. 43-44 °C;  $[\alpha]_D^{20} = -11.0$  (*c* 0.63, CHCl<sub>3</sub>); <sup>1</sup>H NMR (400 MHz, CDCl<sub>3</sub>) δ 7.45 (d, *J* = 7.7 Hz, 2H), 7.40 – 7.33 (m, 2H), 7.32 – 7.26 (m, 2H), 7.17 – 7.09 (m, 2H), 6.99 – 6.90 (m, 1H), 6.60 (d, *J* = 15.8 Hz, 1H), 6.22 (dd, *J* = 15.8, 8.3 Hz, 1H), 4.10 (d, *J* = 13.3 Hz, 1H), 3.19 (d, *J* = 13.3 Hz, 1H), 3.09 – 2.99 (m, 2H), 2.26 – 2.16 (m, 1H), 2.13 – 2.03 (m, 1H), 1.92 – 1.77 (m, 3H); <sup>13</sup>C NMR (100 MHz, CDCl<sub>3</sub>) δ 162.9 (d, *J* = 243.6 Hz), 142.4 (d, *J* = 7.0 Hz), 137.0, 132.4, 131.8, 129.5 (d, *J* = 8.3 Hz), 128.5, 127.4, 126.3, 124.3 (d, *J* = 2.5 Hz), 115.6 (d, *J* = 21.0 Hz), 113.5 (d, *J* = 21.1 Hz), 67.9, 57.8, 53.4, 31.8, 22.2; <sup>19</sup>F NMR (377 MHz, CDCl<sub>3</sub>) δ -113.9. HRMS (ESI) calculated for C<sub>19</sub>H<sub>21</sub>FN [(M+H)<sup>+</sup>]: 282.1653, found: 282.1650. HPLC (Daicel Chiralpak AD-H column, *n*-hexane/isopropanol = 99/1, flow rate 0.5 mL/min, 254 nm): *t*<sub>R</sub> (major) = 9.4 min, *t*<sub>R</sub> (minor) = 10.7 min.

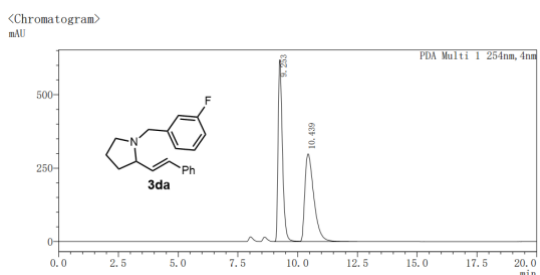

<Peak Table>

| No.   | Ret. Time (min) | Height (uAU) | Height% | Area (uAU*min) | Area%   |
|-------|-----------------|--------------|---------|----------------|---------|
| 1     | 9.253           | 618366       | 67.445  | 7793995        | 49.928  |
| 2     | 10.439          | 298484       | 32.555  | 7816568        | 50.072  |
| Total |                 | 916850       | 100.000 | 15610563       | 100.000 |

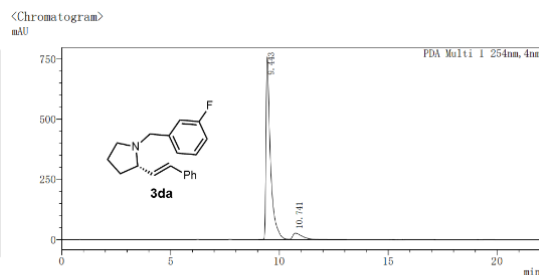

<Peak Table>

| No.   | Ret. Time (min) | Height (uAU) | Height% | Area (uAU*min) | Area%   |
|-------|-----------------|--------------|---------|----------------|---------|
| 1     | 9.443           | 75522        | 96.583  | 10896917       | 92.786  |
| 2     | 10.741          | 26729        | 3.417   | 847266         | 7.214   |
| Total |                 | 782250       | 100.000 | 11744183       | 100.000 |

### (*S,E*)-1-(3-methylbenzyl)-2-styrylpyrrolidine (**3ea**):

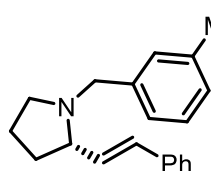

Orange oil (72.6 mg, 87% yield), 93:7 *er*.  $[\alpha]_D^{20} = -39.5$  (*c* 0.83,  $\text{CHCl}_3$ );  $^1\text{H NMR}$  (400 MHz,  $\text{CDCl}_3$ )  $\delta$  7.46 (d,  $J = 7.7$  Hz, 2H), 7.40 – 7.33 (m, 2H), 7.31 – 7.22 (m, 2H), 7.21 – 7.14 (m, 2H), 7.09 (d,  $J = 7.4$  Hz, 1H), 6.61 (d,  $J = 15.8$  Hz, 1H), 6.26 (dd,  $J = 15.8, 8.3$  Hz, 1H), 4.09 (d,  $J = 12.9$  Hz, 1H), 3.16 (d,  $J = 12.9$  Hz, 1H), 3.09 – 2.99 (m, 2H), 2.39 (s, 3H), 2.27 – 2.18 (m, 1H), 2.13 – 2.03 (m, 1H), 1.93 – 1.77 (m, 3H);  $^{13}\text{C NMR}$  (100 MHz,  $\text{CDCl}_3$ )  $\delta$  139.3, 137.7, 137.1, 132.6, 131.6, 129.7, 128.5, 128.0, 127.5, 127.3, 126.3, 126.1, 68.0, 58.4, 53.4, 31.8, 22.1, 21.4. HRMS (ESI) calculated for  $\text{C}_{20}\text{H}_{24}\text{N}$  [(M+H) $^+$ ]: 278.1903, found: 278.1902. HPLC (Daicel Chiralpak OD-H column, *n*-hexane/isopropanol = 99/1, flow rate 0.5 mL/min, 254 nm):  $t_R$  (minor) = 8.9 min,  $t_R$  (major) = 11.3 min.

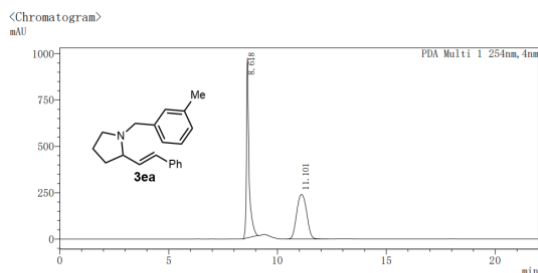

<Peak Table>

| No.   | Ret. Time (min) | Height (uAU) | Height% | Area (uAU*min) | Area%   |
|-------|-----------------|--------------|---------|----------------|---------|
| 1     | 8.618           | 970741       | 80.121  | 7938264        | 50.862  |
| 2     | 11.101          | 240848       | 19.879  | 7669215        | 49.138  |
| Total |                 | 1211589      | 100.000 | 15607479       | 100.000 |

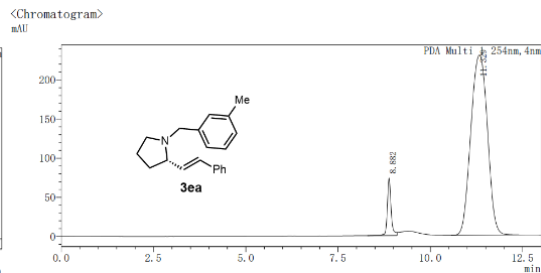

<Peak Table>

| No.   | Ret. Time (min) | Height (uAU) | Height% | Area (uAU*min) | Area%   |
|-------|-----------------|--------------|---------|----------------|---------|
| 1     | 8.882           | 73062        | 24.113  | 528550         | 6.827   |
| 2     | 11.329          | 229936       | 75.887  | 7213522        | 93.173  |
| Total |                 | 302998       | 100.000 | 7742072        | 100.000 |

**(S,E)-1-(4-bromobenzyl)-2-styrylpyrrolidine (3fa):**

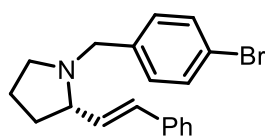

Orange oil (89.8 mg, 88% yield), 90.5:9.5 *er*.  $[\alpha]_D^{20} = +42.9$  (*c* 0.58,  $\text{CHCl}_3$ );  $^1\text{H NMR}$  (400 MHz,  $\text{CDCl}_3$ )  $\delta$  7.47 – 7.37 (m, 4H), 7.36 – 7.30 (m, 2H), 7.27 – 7.18 (m, 3H), 6.56 (d,  $J = 15.8$  Hz, 1H), 6.17 (dd,  $J = 15.8, 8.3$  Hz, 1H), 4.01 (d,  $J = 13.2$  Hz, 1H), 3.12 (d,  $J = 13.2$  Hz, 1H), 3.03 – 2.94 (m, 2H), 2.21 – 2.12 (m, 1H), 2.09 – 2.00 (m, 1H), 1.88 – 1.71 (m, 3H);  $^{13}\text{C NMR}$  (100 MHz,  $\text{CDCl}_3$ )  $\delta$  138.6, 137.0, 132.4, 131.8, 131.2, 130.6, 128.5, 127.4, 126.3, 120.5, 67.9, 57.6, 53.3, 31.8, 22.2. HRMS (ESI) calculated for  $\text{C}_{19}\text{H}_{21}\text{BrN}$  [(M+H) $^+$ ]: 342.0852, found: 342.0846. HPLC (Daicel Chiralpak AD-H column, *n*-hexane/isopropanol = 90/10, flow rate 1.0 mL/min, 254 nm):  $t_R$  (major) = 4.0 min,  $t_R$  (minor) = 4.9 min.

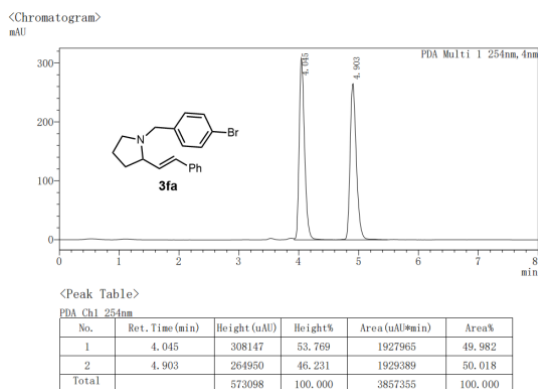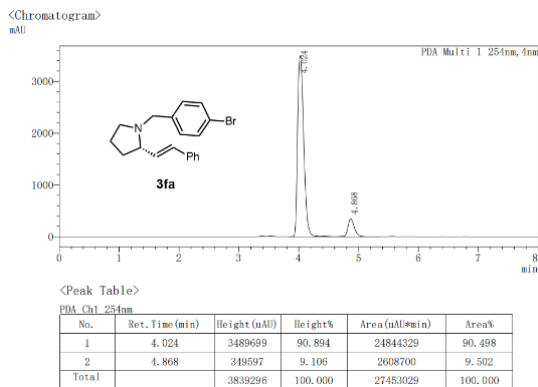

**(*S,E*)-1-(4-methoxybenzyl)-2-styrylpyrrolidine (3ga):**

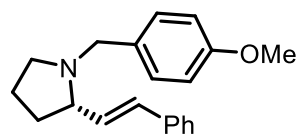

Yellow solid (72.4 mg, 82% yield), 92:8 *er.* m.p. 46-47 °C;

$[\alpha]_D^{20} = +18.5$  (*c* 0.56, CHCl<sub>3</sub>); <sup>1</sup>H NMR (400 MHz, CDCl<sub>3</sub>)

$\delta$  7.42 (d, *J* = 7.7 Hz, 2H), 7.37 – 7.30 (m, 2H), 7.24 (d, *J* =

8.2 Hz, 3H), 6.85 (d, *J* = 8.2 Hz, 2H), 6.56 (d, *J* = 15.8 Hz, 1H), 6.21 (dd, *J* = 15.8, 8.3

Hz, 1H), 4.01 (d, *J* = 12.8 Hz, 1H), 3.79 (s, 3H), 3.13 (d, *J* = 12.8 Hz, 1H), 3.03 – 2.92

(m, 2H), 2.23 – 2.14 (m, 1H), 2.05 – 2.00 (m, 1H), 1.88 – 1.70 (m, 3H); <sup>13</sup>C NMR (100

MHz, CDCl<sub>3</sub>)  $\delta$  158.5, 137.1, 132.7, 131.5, 131.4, 130.1, 128.5, 127.3, 126.3, 113.5,

67.7, 57.6, 55.2, 53.2, 31.8, 22.1. HRMS (ESI) calculated for C<sub>20</sub>H<sub>24</sub>NO [(M+H)<sup>+</sup>]:

294.1852, found: 294.1851. HPLC (Daicel Chiralpak OJ-H column, *n*-

hexane/isopropanol = 99/1, flow rate 0.5 mL/min, 254 nm): *t*<sub>R</sub> (major) = 30.5 min, *t*<sub>R</sub>

(minor) = 40.2 min.

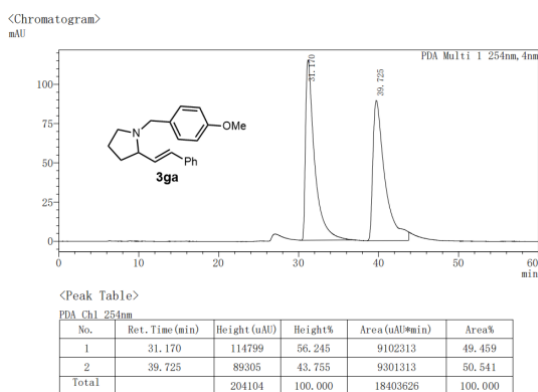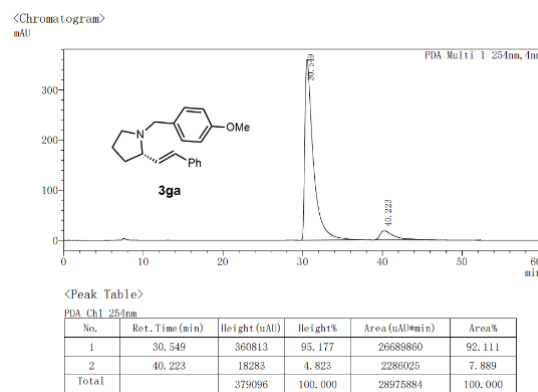

**(*S,E*)-1-(4-(*tert*-butyl)benzyl)-2-styrylpyrrolidine (3ha):**

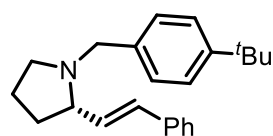

Yellow oil (84.3 mg, 88% yield), 95:5 *er.*  $[\alpha]_D^{20} = +26.4$  (*c* 0.59,

CHCl<sub>3</sub>); <sup>1</sup>H NMR (400 MHz, CDCl<sub>3</sub>)  $\delta$  7.43 (d, *J* = 7.7 Hz, 2H),

7.38 – 7.32 (m, 4H), 7.31 – 7.25 (m, 3H), 6.59 (d, *J* = 15.8 Hz,

1H), 6.22 (dd,  $J = 15.8, 8.3$  Hz, 1H), 4.05 (d,  $J = 13.0$  Hz, 1H), 3.21 (d,  $J = 13.0$  Hz, 1H), 3.11 – 2.98 (m, 2H), 2.28 – 2.19 (m, 1H), 2.08 – 2.02 (m, 1H), 1.91 – 1.74 (m, 3H), 1.34 (s, 9H);  $^{13}\text{C}$  NMR (100 MHz,  $\text{CDCl}_3$ )  $\delta$  149.5, 137.2, 136.3, 132.8, 131.4, 128.7, 128.5, 127.3, 126.3, 125.0, 67.8, 57.9, 53.5, 34.4, 31.9, 31.4, 22.2. HRMS (ESI) calculated for  $\text{C}_{23}\text{H}_{30}\text{N}$  [(M+H) $^+$ ]: 320.2373, found: 320.2367. HPLC (Daicel Chiralpak OJ-H+OJ-H column, *n*-hexane/isopropanol = 99/1, flow rate 0.5 mL/min, 254 nm):  $t_{\text{R}}$  (major) = 22.5 min,  $t_{\text{R}}$  (minor) = 32.1 min.

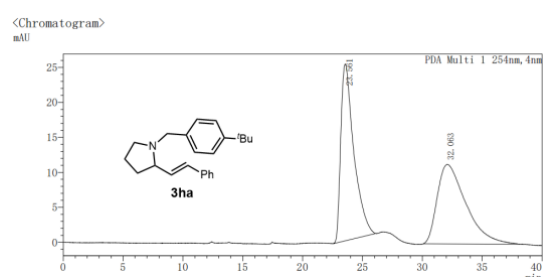

<Peak Table>

| No.   | Ret. Time (min) | Height (aAU) | Height% | Area (aAU*min) | Area%   |
|-------|-----------------|--------------|---------|----------------|---------|
| 1     | 23.561          | 25257        | 69.000  | 1919260        | 50.441  |
| 2     | 32.063          | 11348        | 31.000  | 1885670        | 49.559  |
| Total |                 | 36605        | 100.000 | 3804930        | 100.000 |

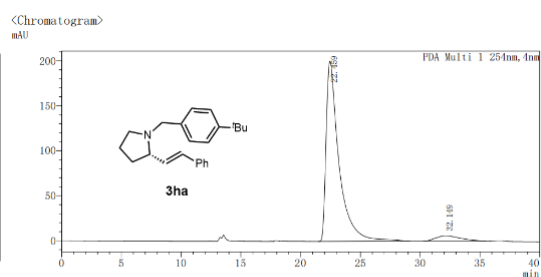

<Peak Table>

| No.   | Ret. Time (min) | Height (aAU) | Height% | Area (aAU*min) | Area%   |
|-------|-----------------|--------------|---------|----------------|---------|
| 1     | 22.459          | 200387       | 97.166  | 15042731       | 94.722  |
| 2     | 32.149          | 5845         | 2.834   | 838208         | 5.278   |
| Total |                 | 206232       | 100.000 | 15880939       | 100.000 |

### (*S,E*)-1-(3,5-dimethoxybenzyl)-2-styrylpyrrolidine (**3ia**):

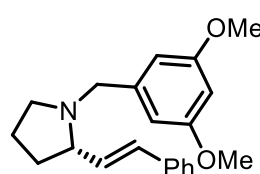

Yellow oil (80.5 mg, 83% yield), 94:6 *er*.  $[\alpha]_{\text{D}}^{20} = +17.6$  (*c* 0.62,  $\text{CHCl}_3$ );  $^1\text{H}$  NMR (400 MHz,  $\text{CDCl}_3$ )  $\delta$  7.41 (d,  $J = 7.7$  Hz, 2H), 7.36 – 7.30 (m, 2H), 7.26 – 7.22 (m, 1H), 6.57 (d,  $J = 15.8$  Hz, 1H), 6.52 (s, 2H), 6.35 (s, 1H), 6.20 (dd,  $J = 15.8, 8.3$  Hz, 1H), 4.02 (d,  $J = 13.1$  Hz, 1H), 3.79 (s, 6H), 3.12 (d,  $J = 13.1$  Hz, 1H), 3.09 – 2.94 (m, 2H), 2.24 – 2.16 (m, 1H), 2.07 – 2.00 (m, 1H), 1.89 – 1.69 (m, 3H);  $^{13}\text{C}$  NMR (100 MHz,  $\text{CDCl}_3$ )  $\delta$  160.6, 141.9, 137.1, 132.6, 131.6, 128.5, 127.3, 126.3, 106.8, 98.8, 67.8, 58.4, 55.2, 53.4, 31.8, 22.2. HRMS (ESI) calculated for  $\text{C}_{21}\text{H}_{26}\text{NO}_2$  [(M+H) $^+$ ]: 324.1958, found: 324.1956. HPLC (Daicel Chiralpak OD-H column, *n*-hexane/isopropanol = 99/1, flow rate 0.5 mL/min, 254 nm):  $t_{\text{R}}$  (minor) = 17.7 min,  $t_{\text{R}}$  (major) = 24.4 min.



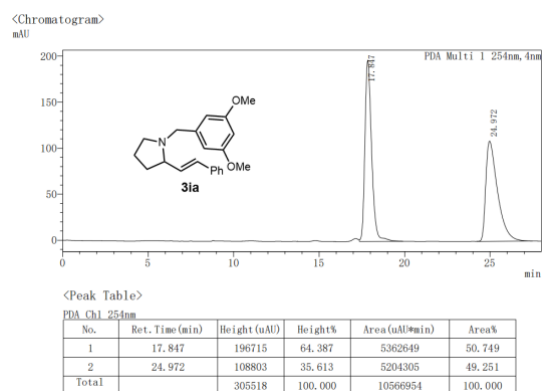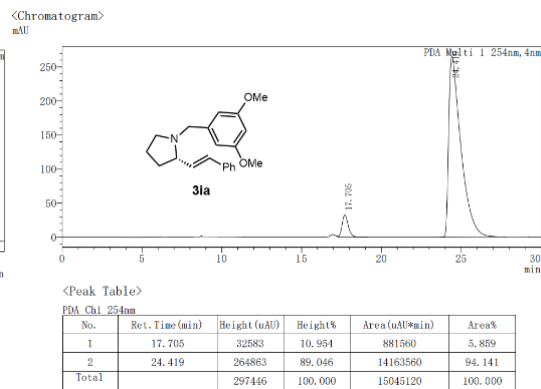

**(S,E)-1-(naphthalen-1-ylmethyl)-2-styrylpyrrolidine (3ja):**

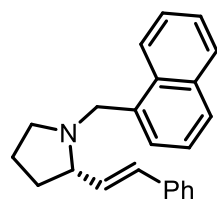

Yellow solid (82.8 mg, 88% yield), 95:5 *er.* m.p. 59-60 °C;  $[\alpha]_D^{20} = +36.8$  (*c* 0.58, CHCl<sub>3</sub>); <sup>1</sup>H NMR (400 MHz, CDCl<sub>3</sub>) δ 8.32 – 8.25 (m, 1H), 7.88 – 7.82 (m, 1H), 7.76 (d, *J* = 8.1 Hz, 1H), 7.54 – 7.44 (m, 5H), 7.42 (d, *J* = 8.0 Hz, 1H), 7.39 – 7.34 (m, 2H), 7.28 – 7.23 (m, 1H), 6.65 (d, *J* = 15.8 Hz, 1H), 6.33 (dd, *J* = 15.8, 8.4 Hz, 1H), 4.60 (d, *J* = 13.0 Hz, 1H), 3.49 (d, *J* = 13.1 Hz, 1H), 3.18 – 3.07 (m, 1H), 2.99 – 2.91 (m, 1H), 2.31 – 2.22 (m, 1H), 2.14 – 2.04 (m, 1H), 1.85 – 1.73 (m, 3H); <sup>13</sup>C NMR (100 MHz, CDCl<sub>3</sub>) δ 137.2, 135.7, 133.8, 132.8, 132.2, 131.8, 128.5, 128.4, 127.6, 127.3, 126.8, 126.3, 125.7, 125.4, 125.2, 124.6, 68.7, 56.4, 54.0, 32.0, 22.3. HRMS (ESI) calculated for C<sub>23</sub>H<sub>24</sub>N [(M+H)<sup>+</sup>]: 314.1903, found: 314.1896. HPLC (Daicel Chiralpak OJ-H+OJ-H column, *n*-hexane/isopropanol = 99/1, flow rate 0.5 mL/min, 254 nm): *t*<sub>R</sub> (minor) = 11.3 min, *t*<sub>R</sub> (major) = 12.4 min.

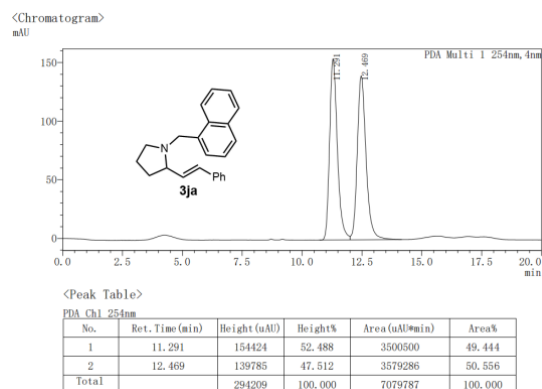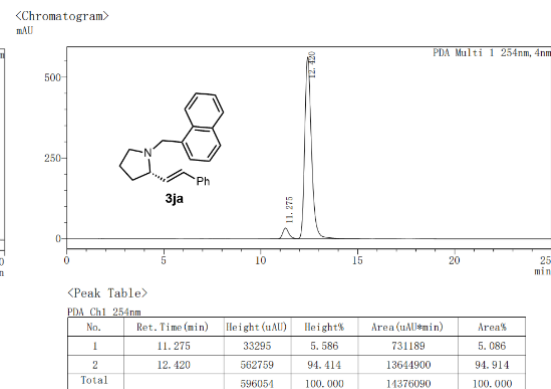

**(S,E)-2-styryl-1-tosylpyrrolidine (3ka):**

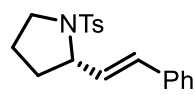

Purified by chromatography on silica gel, eluting with PE/EA = 10/1; yellow solid (87.0 mg, 89% yield), 94.5:5.5 *er.* m.p. 119-120 °C;

$[\alpha]_D^{20} = +5.3$  (*c* 0.54, CHCl<sub>3</sub>); <sup>1</sup>H NMR (400 MHz, CDCl<sub>3</sub>) δ 7.72 (d, *J* = 8.2 Hz, 2H), 7.34 – 7.26 (m, 5H), 7.26 – 7.19 (m, 2H), 6.55 (dd, *J* = 15.8, 1.3 Hz, 1H), 6.05 (dd, *J* = 15.8, 6.7 Hz, 1H), 4.42 – 4.29 (m, 1H), 3.54 – 3.44 (m, 1H), 3.41 – 3.28 (m, 1H), 2.40 (s, 3H), 1.94 – 1.81 (m, 2H), 1.78 – 1.65 (m, 2H); <sup>13</sup>C NMR (100 MHz, CDCl<sub>3</sub>) δ 143.2, 136.6, 135.6, 130.6, 129.9, 129.5, 128.4, 127.6, 127.5, 126.5, 61.6, 48.6, 32.8, 23.9, 21.4. HRMS (ESI) calculated for C<sub>19</sub>H<sub>21</sub>NNaO<sub>2</sub>S [(M+Na)<sup>+</sup>]: 350.1158, found: 350.1182. HPLC (Daicel Chiralpak OD-H column, *n*-hexane/isopropanol = 90/10, flow rate 1.0 mL/min, 254 nm): t<sub>R</sub> (major) = 10.3 min, t<sub>R</sub> (minor) = 13.1 min.

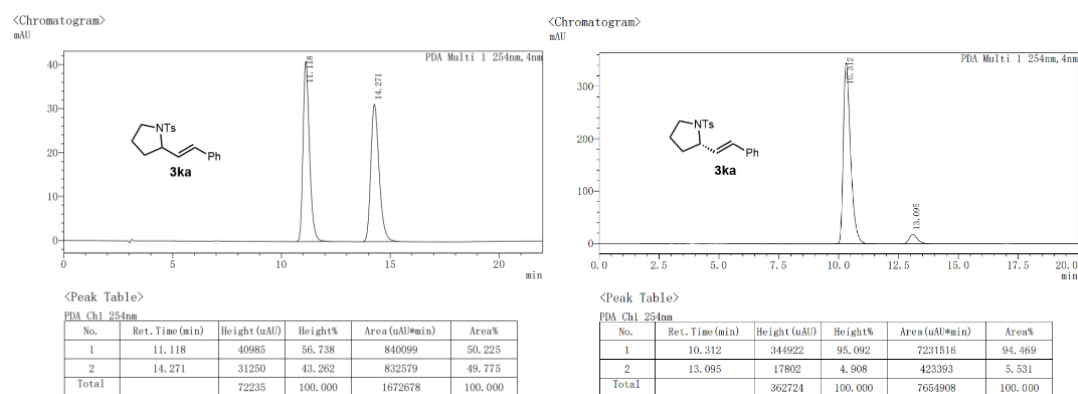

**(*S,E*)-2-(3-methoxy-4-(methoxymethoxy)styryl)-1-((4-nitrophenyl)sulfonyl)pyrrolidine (3lx):**

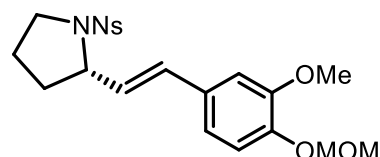

Purified by chromatography on silica gel, eluting with PE/EA/DCM = 10/1/1; yellow solid (698.1 mg, 87% yield), 95.5:4.5 *er*. m.p. 119-120 °C;  $[\alpha]_D^{20} = -95.7$  (*c* 0.62, CHCl<sub>3</sub>); <sup>1</sup>H NMR (400 MHz, CDCl<sub>3</sub>) δ 8.27 (d, *J* = 8.4 Hz, 2H), 7.99 (d, *J* = 8.5 Hz, 2H), 7.07 (d, *J* = 8.1 Hz, 1H), 6.90 – 6.74 (m, 2H), 6.49 (d, *J* = 15.6 Hz, 1H), 5.79 (dd, *J* = 15.7, 7.4 Hz, 1H), 5.23 (s, 2H), 4.55 – 4.35 (m, 1H), 3.87 (s, 3H), 3.62 – 3.43 (m, 5H), 2.05 – 1.91 (m, 2H), 1.90 – 1.73 (m, 2H); <sup>13</sup>C NMR (100 MHz, CDCl<sub>3</sub>) δ 149.83, 149.81, 146.5, 145.1, 131.5, 130.6, 128.6, 127.2, 124.1, 119.4, 116.3, 109.6, 95.5, 62.3, 56.2, 55.9, 48.7, 33.0, 24.1. HRMS (ESI) calculated for C<sub>21</sub>H<sub>24</sub>N<sub>2</sub>NaO<sub>7</sub>S [(M+Na)<sup>+</sup>]: 471.1196, found: 471.1207. HPLC (Daicel Chiralpak AD-H column, *n*-hexane/isopropanol = 90/10, flow rate 1.0 mL/min, 254 nm): t<sub>R</sub> (minor) = 63.8 min, t<sub>R</sub> (major) = 79.9 min.

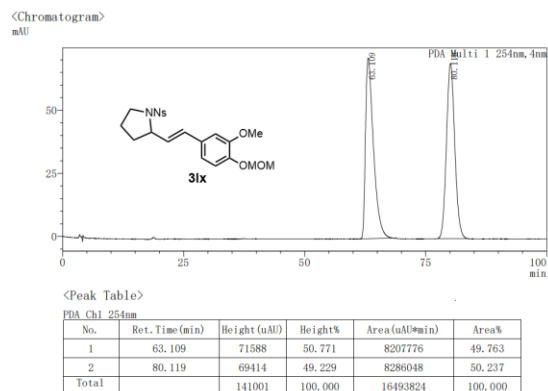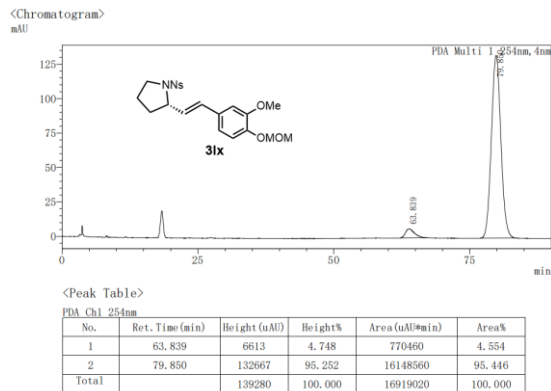

**(S,E)-2-(3-chlorostyryl)-1-((4-nitrophenyl)sulfonyl)pyrrolidine (3ly):**

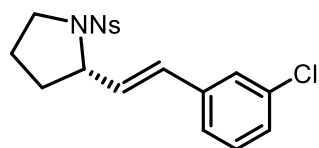

Purified by chromatography on silica gel, eluting with PE/EA/DCM = 20/1/1; yellow solid (708.0 mg, 90% yield), 94:6 *er.* m.p. 130-131 °C;  $[\alpha]_D^{20} = -127.2$  (*c* 1.06, CHCl<sub>3</sub>);

<sup>1</sup>H NMR (400 MHz, CDCl<sub>3</sub>) δ 8.28 (d, *J* = 8.4 Hz, 2H), 7.98 (d, *J* = 8.4 Hz, 2H), 7.27 – 7.18 (m, 3H), 7.13 (d, *J* = 6.6 Hz, 1H), 6.50 (d, *J* = 15.7 Hz, 1H), 5.95 (dd, *J* = 15.7, 7.2 Hz, 1H), 4.53 – 4.32 (m, 1H), 3.58 – 3.38 (m, 2H), 2.03 – 1.90 (m, 2H), 1.88 – 1.74 (m, 2H); <sup>13</sup>C NMR (100 MHz, CDCl<sub>3</sub>) δ 149.9, 144.8, 137.9, 134.6, 130.4, 130.3, 129.8, 128.5, 127.9, 126.2, 124.7, 124.2, 61.9, 48.7, 32.9, 24.1. HRMS (ESI) calculated for C<sub>18</sub>H<sub>17</sub>ClN<sub>2</sub>NaO<sub>4</sub>S [(M+Na)<sup>+</sup>]: 415.0490, found: 415.0487. HPLC (Daicel Chiralpak AD-H column, *n*-hexane/isopropanol = 90/10, flow rate 1.0 mL/min, 254 nm): *t*<sub>R</sub> (major) = 23.4 min, *t*<sub>R</sub> (minor) = 29.2 min.

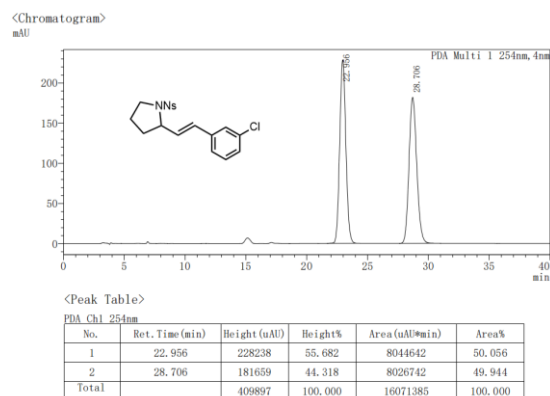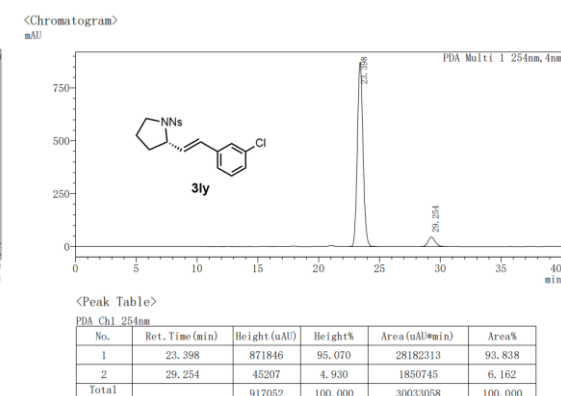

**(S,E)-1-benzyl-2-styrylpiperidine (5aa):**

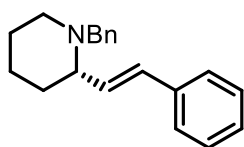

White solid (63.9 mg, 77% yield), 95:5 *er.* m.p. 63-64 °C;  $[\alpha]_D^{20} = -152.9$  (*c* 0.64, CHCl<sub>3</sub>); <sup>1</sup>H NMR (400 MHz, CDCl<sub>3</sub>) δ 7.41 (d, *J* = 7.9 Hz, 2H), 7.38 – 7.27 (m, 6H), 7.27 – 7.19 (m, 2H), 6.58 (d,

$J = 16.0$  Hz, 1H), 6.32 (dd,  $J = 15.9$ , 8.6 Hz, 1H), 4.13 (d,  $J = 13.6$  Hz, 1H), 3.15 (d,  $J = 13.6$  Hz, 1H), 2.88 (t,  $J = 10.5$  Hz, 2H), 1.98 (td,  $J = 11.2$ , 2.0 Hz, 1H), 1.84 – 1.71 (m, 2H), 1.66 – 1.49 (m, 3H), 1.43 – 1.31 (m, 1H);  $^{13}\text{C}$  NMR (100 MHz,  $\text{CDCl}_3$ )  $\delta$  139.4, 137.2, 134.1, 130.7, 129.0, 128.5, 128.0, 127.3, 126.6, 126.2, 66.0, 60.2, 52.3, 33.8, 25.8, 24.0. HRMS (ESI) calculated for  $\text{C}_{20}\text{H}_{24}\text{N}$  [(M+H) $^+$ ]: 278.1903, found: 278.1908. HPLC (Daicel Chiralpak AD-H column, *n*-hexane/isopropanol = 90/10, flow rate 1.0 mL/min, 254 nm):  $t_{\text{R}}$  (major) = 3.6 min,  $t_{\text{R}}$  (minor) = 4.2 min.

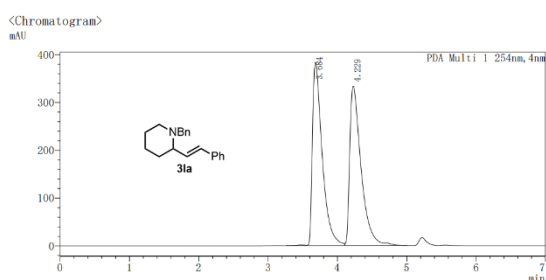

<Peak Table>

| PDA Chl 254nm |                 |              |         |                |         |
|---------------|-----------------|--------------|---------|----------------|---------|
| No.           | Ret. Time (min) | Height (aAU) | Height% | Area (aAU*min) | Area%   |
| 1             | 3.684           | 383481       | 53.492  | 3776571        | 49.954  |
| 2             | 4.229           | 333418       | 46.508  | 3783499        | 50.046  |
| Total         |                 | 716899       | 100.000 | 7560073        | 100.000 |

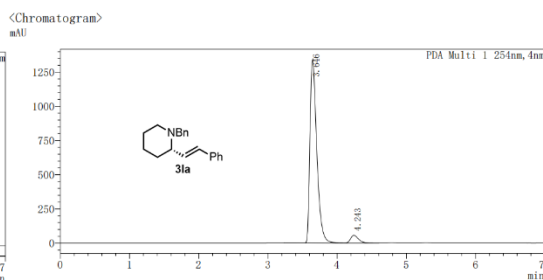

<Peak Table>

| PDA Chl 254nm |                 |              |         |                |         |
|---------------|-----------------|--------------|---------|----------------|---------|
| No.           | Ret. Time (min) | Height (aAU) | Height% | Area (aAU*min) | Area%   |
| 1             | 3.646           | 1342032      | 95.927  | 9255088        | 95.138  |
| 2             | 4.243           | 56976        | 4.073   | 472937         | 4.862   |
| Total         |                 | 1399008      | 100.000 | 9728025        | 100.000 |

### (*S,E*)-1-(4-methoxybenzyl)-2-styrylpiperidine (**5ba**):

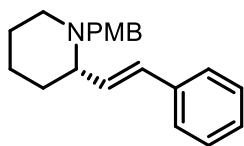

White solid (77.6 mg, 84% yield), 94:6 *er*. m.p. 85-86 °C;  $[\alpha]_{\text{D}}^{20} = -109.4$  ( $c$  1.08,  $\text{CHCl}_3$ );  $^1\text{H}$  NMR (400 MHz,  $\text{CDCl}_3$ )  $\delta$  7.41 (d,  $J = 7.6$  Hz, 2H), 7.38 – 7.29 (m, 2H), 7.29 – 7.19 (m, 3H), 6.90 – 6.81 (m, 2H), 6.57 (d,  $J = 16.0$  Hz, 1H), 6.32 (dd,  $J = 16.1$ , 8.8 Hz, 1H), 4.04 (d,  $J = 13.4$  Hz, 1H), 3.81 (s, 3H), 3.12 (d,  $J = 13.4$  Hz, 1H), 2.94 – 2.80 (m, 2H), 2.02 – 1.89 (m, 1H), 1.82 – 1.68 (m, 2H), 1.66 – 1.47 (m, 3H), 1.42 – 1.30 (m, 1H);  $^{13}\text{C}$  NMR (100 MHz,  $\text{CDCl}_3$ )  $\delta$  158.4, 137.2, 134.1, 131.1, 130.7, 130.2, 128.5, 127.2, 126.2, 113.4, 65.9, 59.5, 55.2, 52.1, 33.7, 25.8, 23.9. HRMS (ESI) calculated for  $\text{C}_{21}\text{H}_{26}\text{NO}$  [(M+H) $^+$ ]: 308.2009, found: 308.2011. HPLC (Daicel Chiralpak OD-H column, *n*-hexane/isopropanol = 95/5, flow rate 0.5 mL/min, 254 nm):  $t_{\text{R}}$  (minor) = 9.5 min,  $t_{\text{R}}$  (major) = 11.2 min.

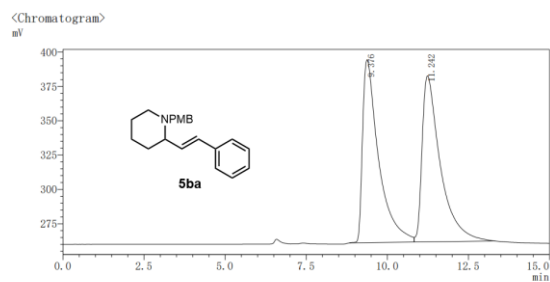

<Peak Table>

| No.   | Ret. Time (min) | Height (uAU) | Height% | Area (uAU*min) | Area%   |
|-------|-----------------|--------------|---------|----------------|---------|
| 1     | 9.376           | 133133       | 52.415  | 4590413        | 49.236  |
| 2     | 11.242          | 120867       | 47.585  | 4732897        | 50.764  |
| Total |                 | 254000       | 100.000 | 9323310        | 100.000 |

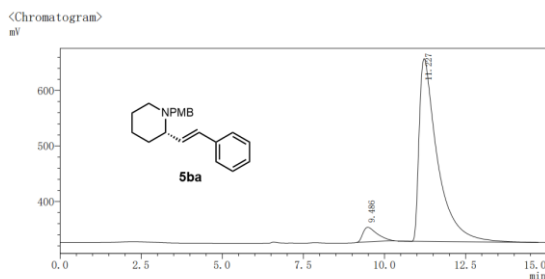

<Peak Table>

| No.   | Ret. Time (min) | Height (uAU) | Height% | Area (uAU*min) | Area%   |
|-------|-----------------|--------------|---------|----------------|---------|
| 1     | 9.486           | 26285        | 7.396   | 802017         | 5.829   |
| 2     | 11.227          | 329127       | 92.604  | 12957058       | 94.171  |
| Total |                 | 355412       | 100.000 | 13759075       | 100.000 |

### (*S,E*)-2-(4-(benzyloxy)styryl)-1-(3-methylbenzyl)piperidine (**5cz**):

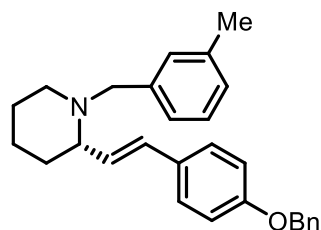

Yellow solid (101.6 mg, 85% yield), 93.5:6.5 *er.* m.p. 73-74 °C;  $[\alpha]_D^{20} = -81.7$  (*c* 0.72, CHCl<sub>3</sub>); <sup>1</sup>H NMR (400 MHz, CDCl<sub>3</sub>) δ 7.46 – 7.41 (m, 2H), 7.41 – 7.36 (m, 2H), 7.36 – 7.28 (m, 3H), 7.22 – 7.15 (m, 1H), 7.13 (s, 1H), 7.11 (d, *J* = 7.8 Hz, 1H), 7.04 (d, *J* = 7.4 Hz, 1H), 6.96 – 6.90 (m, 2H), 6.48 (d, *J* = 15.9 Hz, 1H), 6.15 (dd, *J* = 15.9, 8.6 Hz, 1H), 5.08 (s, 2H), 4.07 (d, *J* = 13.5 Hz, 1H), 3.06 (d, *J* = 13.5 Hz, 1H), 2.92 – 2.84 (m, 1H), 2.85 – 2.74 (m, 1H), 2.34 (s, 3H), 1.98 – 1.88 (m, 1H), 1.79 – 1.69 (m, 3H), 1.63 – 1.49 (m, 3H); <sup>13</sup>C NMR (100 MHz, CDCl<sub>3</sub>) δ 158.2, 139.3, 138.1, 137.6, 137.0, 132.1, 130.4, 130.2, 129.9, 128.6, 128.0, 127.9, 127.4, 127.4, 126.3, 115.0, 70.1, 66.3, 60.3, 52.5, 33.9, 25.9, 24.1, 21.4. HRMS (ESI) calculated for C<sub>28</sub>H<sub>32</sub>NO [(M+H)<sup>+</sup>]: 398.2478, found: 398.2486. HPLC (Daicel Chiralpak OD-H column, *n*-hexane/isopropanol = 95/5, flow rate 0.5 mL/min, 254 nm): *t*<sub>R</sub> (major) = 11.9 min, *t*<sub>R</sub> (minor) = 13.7 min.

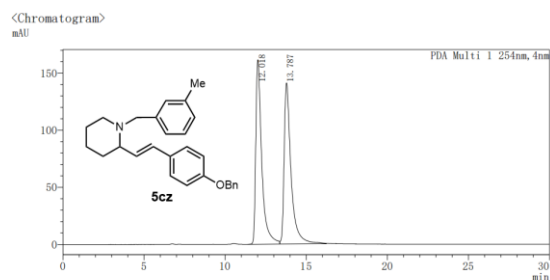

<Peak Table>

| No.   | Ret. Time (min) | Height (uAU) | Height% | Area (uAU*min) | Area%   |
|-------|-----------------|--------------|---------|----------------|---------|
| 1     | 12.018          | 161419       | 53.369  | 4157987        | 49.860  |
| 2     | 13.787          | 141038       | 46.631  | 4181257        | 50.140  |
| Total |                 | 302457       | 100.000 | 8339244        | 100.000 |

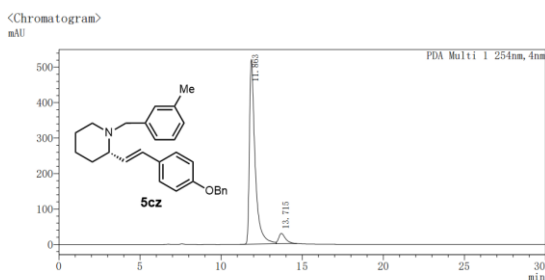

<Peak Table>

| No.   | Ret. Time (min) | Height (uAU) | Height% | Area (uAU*min) | Area%   |
|-------|-----------------|--------------|---------|----------------|---------|
| 1     | 11.863          | 520106       | 94.655  | 12757287       | 93.663  |
| 2     | 13.715          | 29370        | 5.345   | 863151         | 6.337   |
| Total |                 | 549476       | 100.000 | 13620437       | 100.000 |

### (*S,E*)-2-(4-(benzyloxy)styryl)-1-(naphthalen-1-ylmethyl)piperidine (**5dz**):

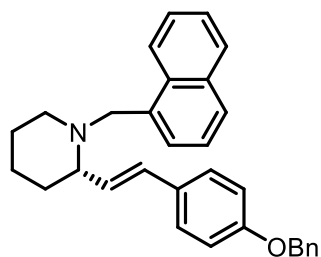

Yellow oil (100.7 mg, 77% yield), 95:5 *er.*  $[\alpha]_D^{20} = -84.7$  (*c* 1.09, CHCl<sub>3</sub>); <sup>1</sup>H NMR (400 MHz, CDCl<sub>3</sub>) δ 8.39 (d, *J* = 7.8 Hz, 1H), 7.87 (d, *J* = 6.9 Hz, 1H), 7.78 (d, *J* = 8.0 Hz, 1H), 7.63 – 7.47 (m, 3H), 7.50 – 7.30 (m, 8H), 7.01 – 6.92 (m, 2H), 6.61 (dd, *J* = 15.9, 3.4 Hz, 1H), 6.35 (ddt, *J* = 15.8, 8.7, 2.5 Hz, 1H), 5.10 (s, 2H), 4.63 (dd, *J* = 13.8, 3.8 Hz, 1H), 3.47 (dd, *J* = 13.7, 3.2 Hz, 1H), 3.05 – 2.91 (m, 1H), 2.92 – 2.83 (m, 1H), 2.08 – 1.93 (m, 1H), 1.90 – 1.73 (m, 2H), 1.74 – 1.63 (m, 1H), 1.62 – 1.34 (m, 3H); <sup>13</sup>C NMR (100 MHz, CDCl<sub>3</sub>) δ 158.3, 137.1, 135.6, 133.9, 132.6, 131.7, 130.5, 130.4, 128.6, 128.5, 128.0, 127.5, 127.4, 127.2, 125.6, 125.5, 125.3, 124.8, 115.1, 70.1, 67.2, 58.5, 52.6, 33.9, 26.0, 24.1. HRMS (ESI) calculated for C<sub>31</sub>H<sub>32</sub>NO [(M+H)<sup>+</sup>]: 434.2478, found: 434.2492. HPLC (Daicel Chiralpak OD-H column, *n*-hexane/isopropanol = 90/10, flow rate 1.0 mL/min, 254 nm): *t*<sub>R</sub> (major) = 6.8 min, *t*<sub>R</sub> (minor) = 9.8 min.

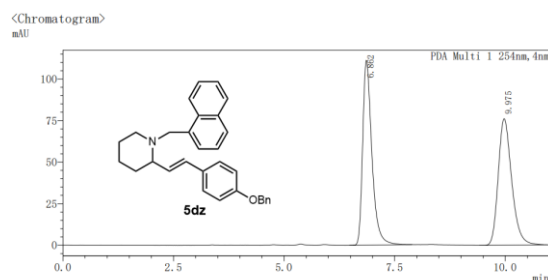

<Peak Table>

| No.   | Ret. Time (min) | Height (aU) | Height% | Area (aU*min) | Area%   |
|-------|-----------------|-------------|---------|---------------|---------|
| 1     | 6.862           | 111064      | 59.351  | 1616499       | 50.032  |
| 2     | 9.975           | 76066       | 40.649  | 1614437       | 49.968  |
| Total |                 | 187130      | 100.000 | 3230936       | 100.000 |

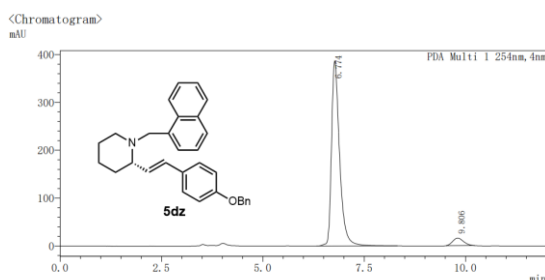

<Peak Table>

| No.   | Ret. Time (min) | Height (aU) | Height% | Area (aU*min) | Area%   |
|-------|-----------------|-------------|---------|---------------|---------|
| 1     | 6.774           | 386654      | 96.129  | 5366940       | 94.910  |
| 2     | 9.806           | 15571       | 3.871   | 287843        | 5.090   |
| Total |                 | 402225      | 100.000 | 5654783       | 100.000 |

### (*S,E*)-1-((4-nitrophenyl)sulfonyl)-2-styrylpiperidine (**5ea**):

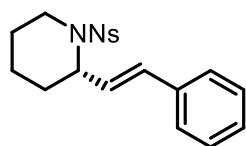

Purified by chromatography on silica gel, eluting with PE/EA/DCM = 20/1/1; yellow solid (90.3 mg, 81% yield), 93.5:6.5 *er.* m.p. 123-124 °C;  $[\alpha]_D^{20} = -76.7$  (*c* 1.07, CHCl<sub>3</sub>); <sup>1</sup>H NMR (400 MHz, CDCl<sub>3</sub>) δ 8.23 – 8.15 (m, 2H), 7.98 – 7.90 (m, 2H), 7.30 – 7.25 (m, 1H), 7.25 – 7.19 (m, 2H), 7.17 – 7.12 (m, 2H), 6.41 (d, *J* = 16.3 Hz, 1H), 5.98 (dd, *J* = 16.0, 6.9 Hz, 1H), 4.90 – 4.70 (m, 1H), 3.89 – 3.72 (m, 1H), 3.17 – 2.95 (m, 1H), 1.88 – 1.76 (m, 2H), 1.74 – 1.66 (m, 1H), 1.66 – 1.59 (m, 1H), 1.59 – 1.47 (m, 2H); <sup>13</sup>C NMR (100 MHz, CDCl<sub>3</sub>) δ 149.5, 146.1, 135.8, 132.9, 128.6, 128.5, 128.0, 126.1, 124.9, 124.0, 55.7, 42.2, 30.7, 25.1, 18.9. HRMS (ESI) calculated for C<sub>19</sub>H<sub>20</sub>N<sub>2</sub>NaO<sub>4</sub>S

[(M+Na)<sup>+</sup>]: 395.1036, found: 395.1034. HPLC (Daicel Chiralpak OD-H column, *n*-hexane/isopropanol = 90/10, flow rate 1.0 mL/min, 254 nm): *t*<sub>R</sub> (major) = 22.5 min, *t*<sub>R</sub> (minor) = 29.5 min.

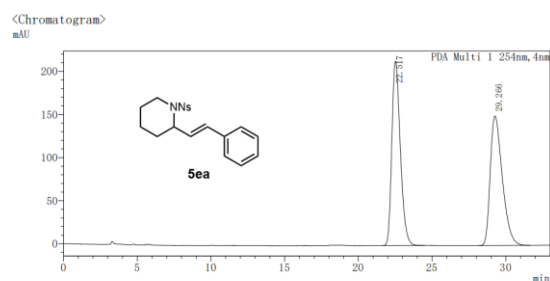

<Peak Table>  
PDA Ch1 254nm

| No.   | Ret. Time (min) | Height (uAU) | Height% | Area (uAU*min) | Area%   |
|-------|-----------------|--------------|---------|----------------|---------|
| 1     | 22.517          | 213866       | 58.727  | 8588411        | 50.082  |
| 2     | 29.266          | 150303       | 41.273  | 8560156        | 49.918  |
| Total |                 | 364169       | 100.000 | 17148568       | 100.000 |

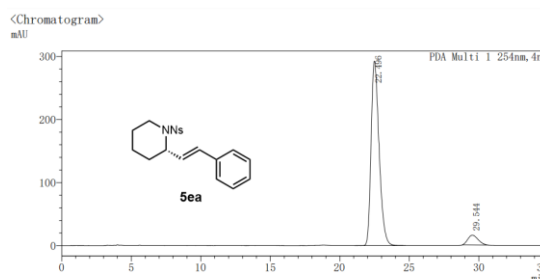

<Peak Table>  
PDA Ch1 254nm

| No.   | Ret. Time (min) | Height (uAU) | Height% | Area (uAU*min) | Area%   |
|-------|-----------------|--------------|---------|----------------|---------|
| 1     | 22.496          | 292475       | 94.949  | 11710632       | 93.632  |
| 2     | 29.544          | 15559        | 5.051   | 796417         | 6.368   |
| Total |                 | 308034       | 100.000 | 12507049       | 100.000 |

**(*S,E*)-1-benzyl-2-(4-bromostyryl)piperidine (5ab):**

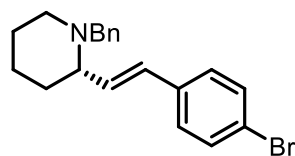

Yellow oil (95.2 mg, 89% yield), 92:8 *er*. [ $\alpha$ ]<sub>D</sub><sup>20</sup> = -89.7 (*c* 1.22, CHCl<sub>3</sub>); <sup>1</sup>H NMR (400 MHz, CDCl<sub>3</sub>)  $\delta$  7.46 – 7.44 (m, 1H), 7.43 – 7.41 (m, 1H), 7.36 – 7.29 (m, 4H), 7.27 – 7.20 (m, 3H), 6.49 (d, *J* = 15.9 Hz, 1H), 6.28 (dd, *J* = 16.0, 8.5 Hz, 1H), 4.07 (d, *J* = 13.6 Hz, 1H), 3.13 (d, *J* = 13.6 Hz, 1H), 2.93 – 2.79 (m, 2H), 1.96 (td, *J* = 11.3, 3.2 Hz, 1H), 1.82 – 1.67 (m, 2H), 1.65 – 1.50 (m, 3H), 1.43 – 1.32 (m, 1H); <sup>13</sup>C NMR (100 MHz, CDCl<sub>3</sub>)  $\delta$  139.4, 136.2, 135.0, 131.6, 129.5, 128.9, 128.0, 127.7, 126.6, 120.9, 66.0, 60.3, 52.4, 33.7, 25.8, 23.9. HRMS (ESI) calculated for C<sub>20</sub>H<sub>23</sub>BrN [(M+H)<sup>+</sup>]: 356.1008, found: 356.1010. HPLC (Daicel Chiralpak AD-H column, *n*-hexane/isopropanol = 90/10, flow rate 1.0 mL/min, 254 nm): *t*<sub>R</sub> (major) = 4.2 min, *t*<sub>R</sub> (minor) = 5.0 min.

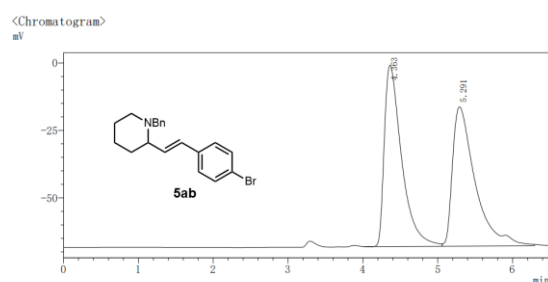

<Peak Table>  
检测器A Ch2 254nm

| No.   | Ret. Time (min) | Height (uAU) | Height% | Area (uAU*min) | Area%   |
|-------|-----------------|--------------|---------|----------------|---------|
| 1     | 4.363           | 67208        | 56.536  | 1079564        | 49.817  |
| 2     | 5.291           | 51669        | 43.464  | 1087490        | 50.183  |
| Total |                 | 118877       | 100.000 | 2167055        | 100.000 |

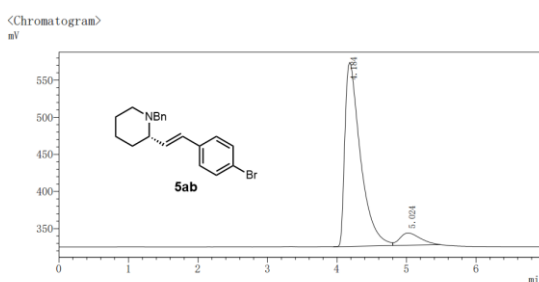

<Peak Table>  
检测器A Ch2 254nm

| No.   | Ret. Time (min) | Height (uAU) | Height% | Area (uAU*min) | Area%   |
|-------|-----------------|--------------|---------|----------------|---------|
| 1     | 4.184           | 247864       | 93.750  | 3866902        | 91.937  |
| 2     | 5.024           | 16523        | 6.250   | 339145         | 8.063   |
| Total |                 | 264387       | 100.000 | 4206048        | 100.000 |

**(*S,E*)-1-benzyl-2-(4-phenoxytyryl)piperidine (5ae):**

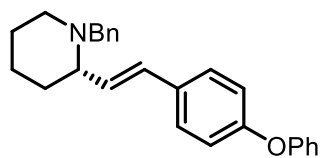

Yellow solid (99.8 mg, 90% yield), 95:5 *er.* m.p. 78-79 °C;  $[\alpha]_D^{20} = -98.9$  (*c* 1.20, CHCl<sub>3</sub>); <sup>1</sup>H NMR (400 MHz, CDCl<sub>3</sub>)  $\delta$  7.42 – 7.29 (m, 8H), 7.29 – 7.21 (m, 1H), 7.16 – 7.09 (m, 1H), 7.06 – 7.02 (m, 2H), 7.02 – 6.96 (m, 2H), 6.55 (d, *J* = 15.9 Hz, 1H), 6.24 (dd, *J* = 16.0, 8.6 Hz, 1H), 4.14 (d, *J* = 13.6 Hz, 1H), 3.15 (d, *J* = 13.6 Hz, 1H), 2.98 – 2.80 (m, 2H), 1.98 (td, *J* = 11.2, 3.3 Hz, 1H), 1.84 – 1.71 (m, 2H), 1.68 – 1.51 (m, 3H), 1.46 – 1.32 (m, 1H); <sup>13</sup>C NMR (100 MHz, CDCl<sub>3</sub>)  $\delta$  157.2, 156.4, 139.4, 133.2, 132.5, 129.9, 129.7, 129.0, 128.0, 127.5, 126.6, 123.1, 119.0, 118.7, 66.1, 60.2, 52.3, 33.8, 25.8, 24.0. HRMS (ESI) calculated for C<sub>26</sub>H<sub>28</sub>NO [(M+H)<sup>+</sup>]: 370.2165, found: 370.2173. HPLC (Daicel Chiralpak AD-H column, *n*-hexane/isopropanol = 90/10, flow rate 1.0 mL/min, 254 nm): *t*<sub>R</sub> (major) = 4.5 min, *t*<sub>R</sub> (minor) = 7.0 min.

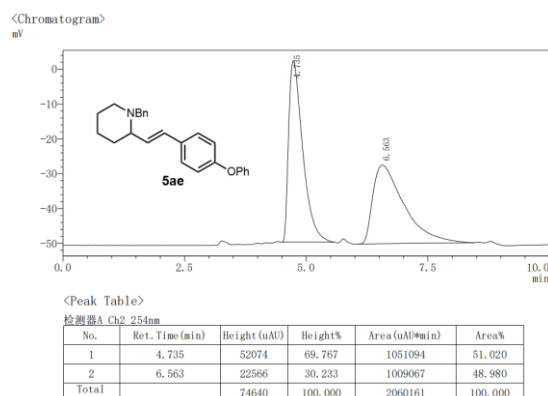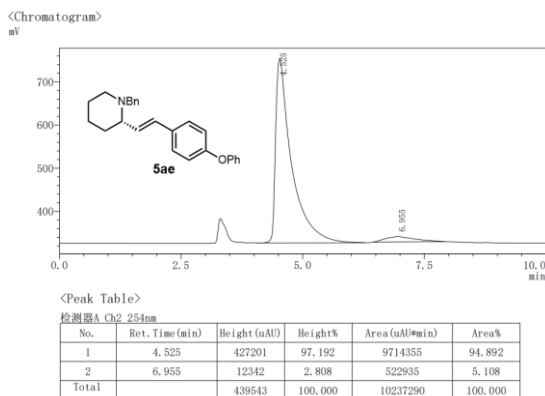

### (*S,E*)-1-benzyl-2-(4-(methylthio)styryl)pyperidine (**5af**):

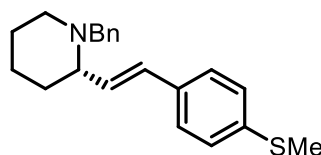

Yellow solid (76.8 mg, 79% yield), 94.5:5.5 *er.* m.p. 84-85 °C;  $[\alpha]_D^{20} = -105.0$  (*c* 0.94, CHCl<sub>3</sub>); <sup>1</sup>H NMR (400 MHz, CDCl<sub>3</sub>)  $\delta$  7.35 – 7.27 (m, 6H), 7.25 – 7.18 (m, 3H), 6.50 (d, *J* = 16.0 Hz, 1H), 6.25 (dd, *J* = 15.9, 8.6 Hz, 1H), 4.09 (d, *J* = 13.6 Hz, 1H), 3.12 (d, *J* = 13.6 Hz, 1H), 2.97 – 2.78 (m, 2H), 2.48 (s, 3H), 1.95 (td, *J* = 11.3, 3.2 Hz, 1H), 1.81 – 1.67 (m, 2H), 1.65 – 1.45 (m, 3H), 1.42 – 1.29 (m, 1H); <sup>13</sup>C NMR (100 MHz, CDCl<sub>3</sub>)  $\delta$  139.4, 137.3, 134.3, 133.7, 130.1, 129.0, 128.0, 126.8, 126.6 (overlap), 66.1, 60.2, 52.4, 33.8, 25.8, 24.0, 16.0. HRMS (ESI) calculated for C<sub>21</sub>H<sub>26</sub>NS [(M+H)<sup>+</sup>]: 324.1780, found: 324.1780. HPLC (Daicel Chiralpak AD-H column, *n*-hexane/isopropanol = 90/10, flow rate 1.0 mL/min, 254 nm): *t*<sub>R</sub> (major) = 4.7 min, *t*<sub>R</sub> (minor) = 7.1 min.



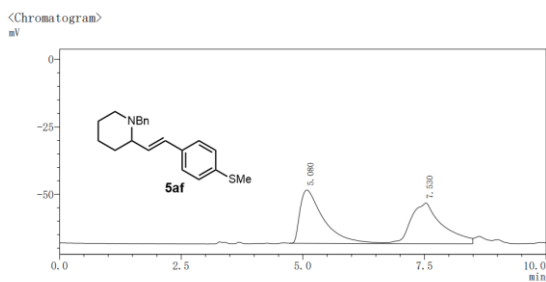

<Peak Table>

| No.   | Ret. Time (min) | Height (uAU) | Height% | Area (uAU*min) | Area%   |
|-------|-----------------|--------------|---------|----------------|---------|
| 1     | 5.080           | 19754        | 56.779  | 662778         | 49.558  |
| 2     | 7.530           | 15037        | 43.221  | 674609         | 50.442  |
| Total |                 | 34791        | 100.000 | 1337387        | 100.000 |

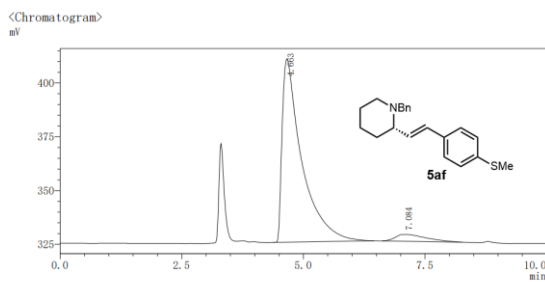

<Peak Table>

| No.   | Ret. Time (min) | Height (uAU) | Height% | Area (uAU*min) | Area%   |
|-------|-----------------|--------------|---------|----------------|---------|
| 1     | 4.663           | 85214        | 96.441  | 2393485        | 94.436  |
| 2     | 7.084           | 3144         | 3.559   | 141022         | 5.564   |
| Total |                 | 88359        | 100.000 | 2534507        | 100.000 |

**(S,E)-2-(2-([1,1'-biphenyl]-4-yl)vinyl)-1-benzylpiperidine (5ag):**

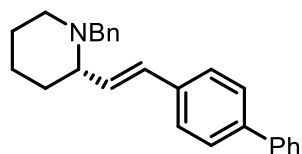

Yellow solid (63.2 mg, 60% yield), 95.5:4.5 *er.* m.p. 110-111 °C;  $[\alpha]_D^{20} = -116.7$  (*c* 0.59, CHCl<sub>3</sub>); <sup>1</sup>H NMR (400 MHz, CDCl<sub>3</sub>) δ 7.62 – 7.58 (m, 2H), 7.58 – 7.54 (m, 2H), 7.50 –

7.41 (m, 4H), 7.38 – 7.28 (m, 5H), 7.26 – 7.20 (m, 1H), 6.59 (d, *J* = 16.0 Hz, 1H), 6.35 (dd, *J* = 16.0, 8.6 Hz, 1H), 4.12 (d, *J* = 13.6 Hz, 1H), 3.15 (d, *J* = 13.6 Hz, 1H), 3.00 – 2.79 (m, 2H), 1.97 (td, *J* = 11.2, 3.3 Hz, 1H), 1.83 – 1.68 (m, 2H), 1.68 – 1.47 (m, 3H), 1.43 – 1.31 (m, 1H); <sup>13</sup>C NMR (100 MHz, CDCl<sub>3</sub>) δ 140.8, 140.1, 139.4, 136.3, 134.3, 130.3, 129.1, 128.8, 128.0, 127.2, 126.9, 126.6 (overlap), 66.1, 60.3, 52.4, 33.8 25.8, 24.0. HRMS (ESI) calculated for C<sub>26</sub>H<sub>28</sub>N [(M+H)<sup>+</sup>]: 354.2216, found: 354.2216. HPLC (Daicel Chiralpak AD-H column, *n*-hexane/isopropanol = 90/10, flow rate 1.0 mL/min, 254 nm): *t*<sub>R</sub> (major) = 5.0 min, *t*<sub>R</sub> (minor) = 7.8 min.

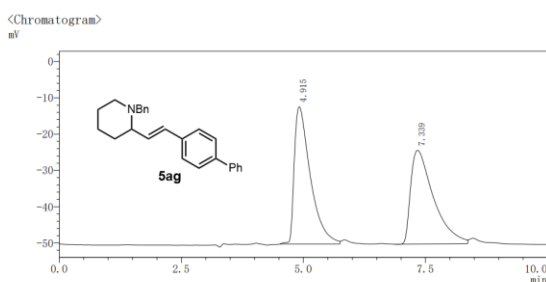

<Peak Table>

| No.   | Ret. Time (min) | Height (uAU) | Height% | Area (uAU*min) | Area%   |
|-------|-----------------|--------------|---------|----------------|---------|
| 1     | 4.915           | 37823        | 59.418  | 868813         | 50.847  |
| 2     | 7.339           | 25832        | 40.582  | 839872         | 49.153  |
| Total |                 | 63655        | 100.000 | 1708685        | 100.000 |

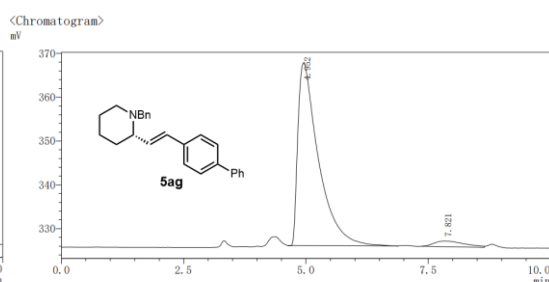

<Peak Table>

| No.   | Ret. Time (min) | Height (uAU) | Height% | Area (uAU*min) | Area%   |
|-------|-----------------|--------------|---------|----------------|---------|
| 1     | 4.952           | 41766        | 97.047  | 1226783        | 95.689  |
| 2     | 7.821           | 1271         | 2.953   | 55271          | 4.311   |
| Total |                 | 43037        | 100.000 | 1282054        | 100.000 |

**(S,E)-1-benzyl-2-(3,4,5-trimethoxystyryl)piperidine (5ap):**

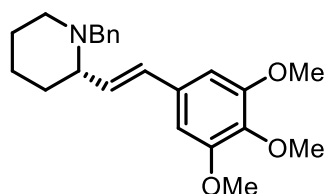

Yellow solid (93.3 mg, 85% yield), 94.5:5.5 *er.* m.p. 54-55 °C;  $[\alpha]_D^{20} = -92.3$  (*c* 1.18, CHCl<sub>3</sub>); <sup>1</sup>H NMR (400 MHz, CDCl<sub>3</sub>) δ 7.36 – 7.27 (m, 4H), 7.25 – 7.19 (m, 1H), 6.61 (s,

2H), 6.48 (d,  $J = 15.9$  Hz, 1H), 6.19 (dd,  $J = 15.8, 8.6$  Hz, 1H), 4.10 (d,  $J = 13.7$  Hz, 1H), 3.88 (s, 6H), 3.85 (s, 3H), 3.14 (d,  $J = 13.7$  Hz, 1H), 2.94 – 2.77 (m, 2H), 1.95 (td,  $J = 11.3, 3.1$  Hz, 1H), 1.83 – 1.68 (m, 2H), 1.67 – 1.49 (m, 3H), 1.41 – 1.29 (m, 1H);  $^{13}\text{C}$  NMR (100 MHz,  $\text{CDCl}_3$ )  $\delta$  153.2, 139.3, 137.6, 133.6, 132.9, 130.5, 128.9, 127.9, 126.5, 103.2, 66.1, 60.8, 60.2, 56.0, 52.4, 33.8, 25.8, 23.9. HRMS (ESI) calculated for  $\text{C}_{23}\text{H}_{30}\text{NO}_3$   $[(\text{M}+\text{H})^+]$ : 368.2220, found: 368.2223. HPLC (Daicel Chiralpak AD-H column, *n*-hexane/isopropanol = 90/10, flow rate 1.0 mL/min, 254 nm):  $t_{\text{R}}$  (major) = 6.3 min,  $t_{\text{R}}$  (minor) = 11.0 min.

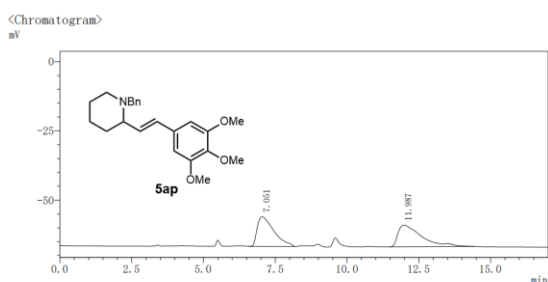

<Peak Table>

| 检测器A Ch2 254nm |                 |               |         |                 |         |
|----------------|-----------------|---------------|---------|-----------------|---------|
| No.            | Ret. Time (min) | Height (a.u.) | Height% | Area (a.u.*min) | Area%   |
| 1              | 7.051           | 10763         | 57.968  | 436464          | 49.256  |
| 2              | 11.987          | 7805          | 42.032  | 449658          | 50.744  |
| Total          |                 | 18568         | 100.000 | 886122          | 100.000 |

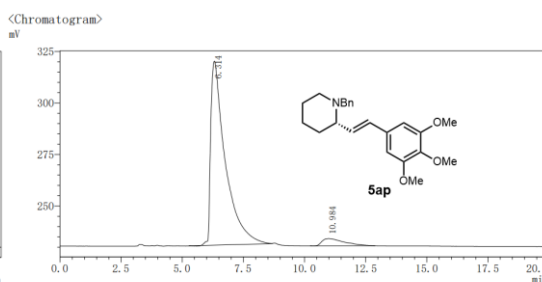

<Peak Table>

| 检测器A Ch2 254nm |                 |               |         |                 |         |
|----------------|-----------------|---------------|---------|-----------------|---------|
| No.            | Ret. Time (min) | Height (a.u.) | Height% | Area (a.u.*min) | Area%   |
| 1              | 6.314           | 89323         | 96.190  | 3720770         | 94.427  |
| 2              | 10.984          | 3538          | 3.810   | 219593          | 5.573   |
| Total          |                 | 92861         | 100.000 | 3940363         | 100.000 |

**(*S,E*)-1-benzyl-2-(2-(naphthalen-1-yl)vinyl)piperidine (5ar):**

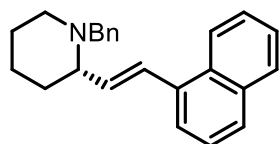

Yellow oil (49.6 mg, 51% yield), 95:5 *er*.  $[\alpha]_{\text{D}}^{20} = -58.5$  ( $c$  1.22,  $\text{CHCl}_3$ );  $^1\text{H}$  NMR (400 MHz,  $\text{CDCl}_3$ )  $\delta$  8.16 (d,  $J = 7.9$  Hz, 1H), 7.88 (d,  $J = 8.6$  Hz, 1H), 7.80 (d,  $J = 8.2$  Hz, 1H), 7.62 (d,  $J = 7.1$  Hz, 1H), 7.58 – 7.44 (m, 3H), 7.43 – 7.38 (m, 2H), 7.38 – 7.31 (m, 3H), 7.31 – 7.26 (m, 1H), 6.38 (ddd,  $J = 15.8, 8.7, 1.5$  Hz, 1H), 4.23 (d,  $J = 13.5$  Hz, 1H), 3.26 (d,  $J = 13.6$  Hz, 1H), 3.12 – 3.00 (m, 1H), 2.98 – 2.88 (m, 1H), 2.06 (td,  $J = 11.1, 3.3$  Hz, 1H), 1.90 – 1.79 (m, 2H), 1.76 – 1.54 (m, 3H), 1.51 – 1.38 (m, 1H);  $^{13}\text{C}$  NMR (100 MHz,  $\text{CDCl}_3$ )  $\delta$  139.4, 137.3, 135.0, 133.6, 131.1, 129.1, 128.5, 128.1, 127.9, 127.6, 126.6, 125.9, 125.7, 125.6, 123.8 (overlap), 66.2, 60.3, 52.4, 33.9, 25.9, 24.0. HRMS (ESI) calculated for  $\text{C}_{24}\text{H}_{26}\text{N}$   $[(\text{M}+\text{H})^+]$ : 328.2060, found: 328.2055. HPLC (Daicel Chiralpak OD-H column, *n*-hexane/isopropanol = 90/10, flow rate 1.0 mL/min, 254 nm):  $t_{\text{R}}$  (minor) = 4.6 min,  $t_{\text{R}}$  (major) = 4.9 min.

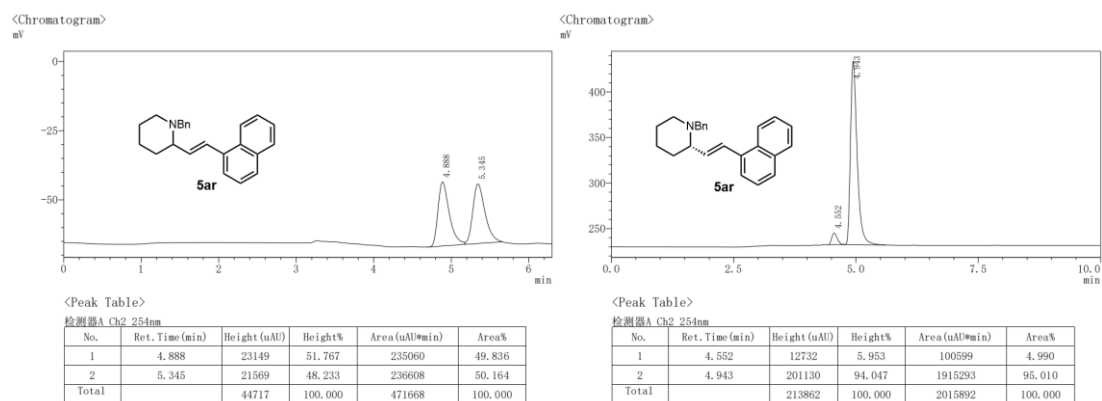

### (*S,E*)-1-benzyl-2-(2-(furan-2-yl)vinyl)piperidine (**5at**):

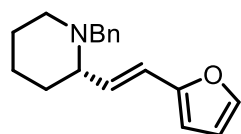

Yellow oil (60.1 mg, 75% yield), 94:6 *er.*  $[\alpha]_D^{20} = -112.6$  (*c* 1.17,  $\text{CHCl}_3$ );  $^1\text{H NMR}$  (400 MHz,  $\text{CDCl}_3$ )  $\delta$  7.38 – 7.27 (m, 5H), 7.26 – 7.20 (m, 1H), 6.43 – 6.35 (m, 2H), 6.26 (dd,  $J = 16.0, 8.5$  Hz, 1H), 6.21 (d,  $J = 3.3$  Hz, 1H), 4.10 (d,  $J = 13.5$  Hz, 1H), 3.11 (d,  $J = 13.6$  Hz, 1H), 2.93 – 2.77 (m, 2H), 1.95 (td,  $J = 11.1, 3.4$  Hz, 1H), 1.81 – 1.68 (m, 2H), 1.66 – 1.49 (m, 3H), 1.43 – 1.31 (m, 1H);  $^{13}\text{C NMR}$  (100 MHz,  $\text{CDCl}_3$ )  $\delta$  152.8, 141.6, 139.4, 132.8, 129.0, 128.0, 126.6, 119.4, 111.1, 107.0, 65.7, 60.2, 52.1, 33.7, 25.8, 23.9. HRMS (ESI) calculated for  $\text{C}_{18}\text{H}_{22}\text{NO}$   $[(\text{M}+\text{H})^+]$ : 268.1696, found: 268.1701. HPLC (Daicel Chiralpak AD-H column, *n*-hexane/isopropanol = 90/10, flow rate 1.0 mL/min, 254 nm):  $t_R$  (major) = 3.9 min,  $t_R$  (minor) = 5.0 min.

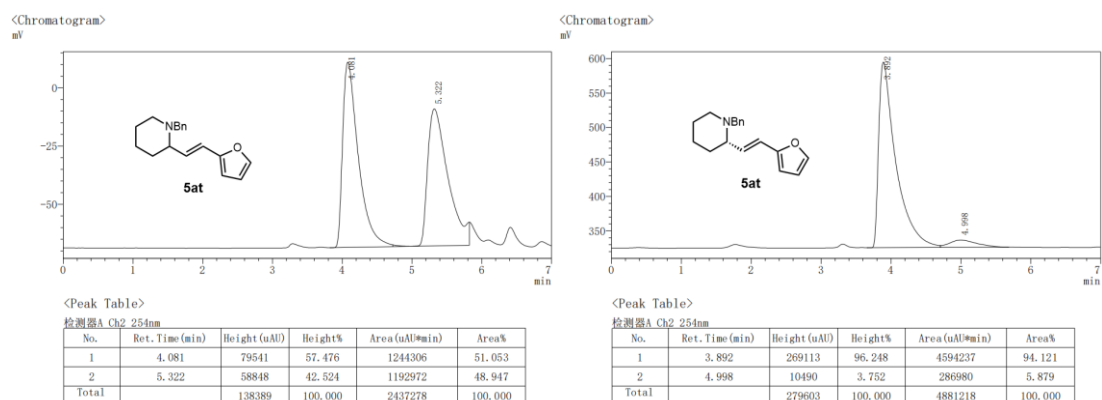

### (*S,E*)-1-benzyl-2-(2-(thiophen-2-yl)vinyl)piperidine (**5aw**):

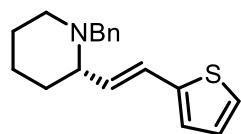

Yellow oil (55.8 mg, 66% yield), 95.5:4.5 *er.*  $[\alpha]_D^{20} = -122.7$  (*c* 0.64,  $\text{CHCl}_3$ );  $^1\text{H NMR}$  (400 MHz,  $\text{CDCl}_3$ )  $\delta$  7.36 – 7.29 (m, 4H), 7.26 – 7.21 (m, 1H), 7.16 – 7.12 (m, 1H), 7.00 – 6.87 (m, 2H), 6.69 (d,  $J = 15.8$  Hz, 1H), 6.15 (dd,  $J = 15.8, 8.6$  Hz, 1H), 4.11 (d,  $J = 13.6$  Hz, 1H), 3.12 (d,

$J = 13.6$  Hz, 1H), 2.93 – 2.71 (m, 2H), 1.95 (td,  $J = 11.3, 3.3$  Hz, 1H), 1.81 – 1.68 (m, 2H), 1.65 – 1.49 (m, 3H), 1.42 – 1.31 (m, 1H);  $^{13}\text{C}$  NMR (100 MHz,  $\text{CDCl}_3$ )  $\delta$  142.4, 139.4, 133.8, 129.0, 128.0, 127.2, 126.6, 124.9, 124.0, 123.8, 65.8, 60.2, 52.2, 33.7, 25.8, 23.9. HRMS (ESI) calculated for  $\text{C}_{18}\text{H}_{22}\text{NS}$  [(M+H) $^+$ ]: 284.1467, found: 284.1473. HPLC (Daicel Chiralpak AD-H column, *n*-hexane/isopropanol = 95/5, flow rate 0.5 mL/min, 254 nm):  $t_{\text{R}}$  (major) = 8.2 min,  $t_{\text{R}}$  (minor) = 11.4 min.

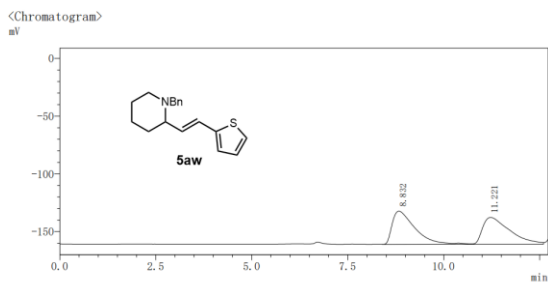

<Peak Table>

检测器A Ch2 254nm

| No.   | Ret. Time (min) | Height (uAU) | Height% | Area (uAU*min) | Area%   |
|-------|-----------------|--------------|---------|----------------|---------|
| 1     | 8.832           | 28774        | 55.261  | 1186213        | 50.853  |
| 2     | 11.221          | 23295        | 44.739  | 1146439        | 49.147  |
| Total |                 | 52069        | 100.000 | 2332651        | 100.000 |

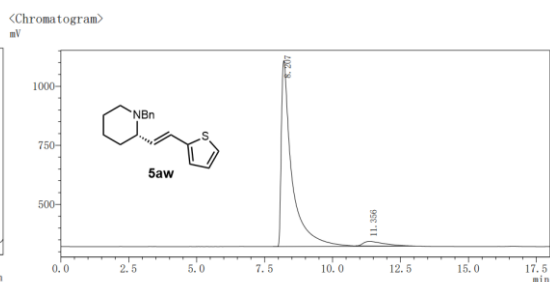

<Peak Table>

检测器A Ch2 254nm

| No.   | Ret. Time (min) | Height (uAU) | Height% | Area (uAU*min) | Area%   |
|-------|-----------------|--------------|---------|----------------|---------|
| 1     | 8.207           | 786044       | 97.648  | 21400680       | 95.475  |
| 2     | 11.356          | 18934        | 2.352   | 1014299        | 4.525   |
| Total |                 | 804978       | 100.000 | 22414979       | 100.000 |

## 5. Gram-scale Reaction and Synthetic Applications

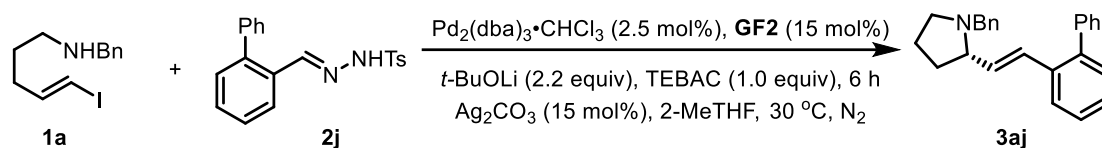

To a 100 mL flame-dried flask was added *N*-tosylhydrazones **2j** (9.6 mmol, 3.36 g),  $\text{Pd}_2(\text{dba})_3 \cdot \text{CHCl}_3$  (0.15 mmol, 155.3 mg), **GF2** (0.9 mmol, 681.3 mg), *t*-BuOLi (13.2 mmol, 1.06 g),  $\text{Ag}_2\text{CO}_3$  (0.9 mmol, 248.2 mg), and triethylbenzylammonium chloride (TEBAC, 6 mmol, 1.37 g) was added in the glove box. The reaction was evacuated and back-filled with  $\text{N}_2$  three times and a solution of the vinyl iodide **1a** (6 mmol, 1.81 g) in 60 mL 2- MeTHF was added under nitrogen atmosphere. Then the reaction was stirred at 30 °C for 6 h. Upon completion, the reaction mixture was filtered through celite, evaporated *in vacuo* and purified by silica gel column chromatography (DCM to PE/ $\text{Et}_3\text{N}$  = 50:1) to give the product **3aj** (1.74 g, 85% yield, 95.5:4.5 *er*).

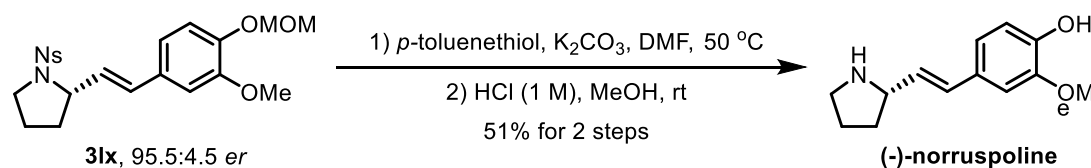

According to published literature,<sup>[5, 6]</sup> to a round-bottom flask was added **3lx** (0.2 mmol, 89.6 mg), *p*-toluenethiol (0.3 mmol, 37.3 mg) and  $\text{K}_2\text{CO}_3$  (0.6 mmol, 82.9 mg) in DMF (2 mL). The reaction mixture was stirred at 50 °C overnight, then cooled to room temperature, diluted with water and extracted with EtOAc. The organic layer was dried over  $\text{Na}_2\text{SO}_4$  and concentrated *in vacuo*. The residue was used in the next step without any further purification.

To a solution of the residue in MeOH (2 mL) at room temperature was added 1 M aqueous HCl (4 mL). The reaction mixture was stirred for 8 h, then added the saturated aqueous  $\text{NaHCO}_3$  to basify the mixture to  $\text{pH} \geq 7$  and extracted with EtOAc. The organic layer was dried over  $\text{Na}_2\text{SO}_4$  and concentrated *in vacuo*. Purification by thin-layer chromatography (DCM/MeOH = 3/1) gave (-)-norruspoline (22.2 mg, 51% yield) as an orange solid. m.p. 69-70 °C;  $[\alpha]_{\text{D}}^{20} = -29.1$  (*c* 0.76,  $\text{CHCl}_3$ );  $^1\text{H}$  NMR (400 MHz,  $\text{CDCl}_3$ )  $\delta$  6.87 (s, 1H), 6.82 (s, 2H), 6.41 (d, *J* = 15.7 Hz, 1H), 6.03 (dd, *J* = 15.7, 7.3

Hz, 1H), 3.86 (s, 3H), 3.68 (q,  $J = 7.4$  Hz, 1H), 3.16 – 3.05 (m, 1H), 2.99 – 2.89 (m, 1H), 2.09 – 1.93 (m, 1H), 1.92 – 1.76 (m, 2H), 1.64 – 1.50 (m, 1H);  $^{13}\text{C}$  NMR (100 MHz,  $\text{CDCl}_3$ )  $\delta$  147.0, 145.7, 130.2, 129.4, 129.3, 120.0, 114.8, 108.3, 61.0, 55.8, 46.2, 32.3, 25.2. HRMS (ESI) calculated for  $\text{C}_{13}\text{H}_{18}\text{NO}_2$   $[(\text{M}+\text{H})^+]$ : 220.1332, found: 220.1336.

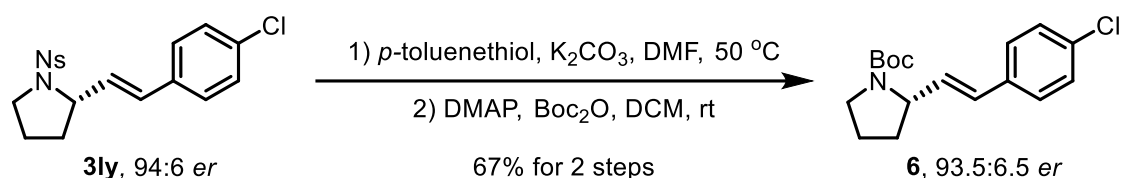

According to published literature,<sup>[5, 7]</sup> to a round-bottom flask was added **3ly** (0.15 mmol, 58.8 mg), *p*-toluenethiol (0.23 mmol, 27.9 mg) and  $\text{K}_2\text{CO}_3$  (0.45 mmol, 62.2 mg) in DMF (2 mL). The following steps are the same as above to obtain the deprotected crude product.

To a solution of the crude product, 4-(dimethylamino) pyridine (0.015 mmol, 1.8 mg) in DCM (2 mL) at room temperature was added  $\text{Boc}_2\text{O}$  (0.17 mmol, 38  $\mu\text{L}$ ). The reaction mixture was stirred for 2 h. Upon completion, the mixture was concentrated *in vacuo* and purified by flash chromatography (PE/EA = 10/1) gave **6** (31.1 mg, 67% yield, 93.5:6.5 *er*) as colorless oil.  $[\alpha]_D^{20} = -88.1$  ( $c$  1.03,  $\text{CHCl}_3$ );  $^1\text{H}$  NMR (400 MHz,  $\text{CDCl}_3$ )  $\delta$  7.33 (s, 1H), 7.25 – 7.12 (m, 3H), 6.33 (d,  $J = 15.4$  Hz, 1H), 6.20 – 6.02 (m, 1H), 4.73 – 4.26 (m, 2H), 3.45 (s, 2H), 2.09 (s, 1H), 1.99 – 1.68 (m, 3H), 1.42 (s, 9H);  $^{13}\text{C}$  NMR (100 MHz,  $\text{CDCl}_3$ )  $\delta$  154.4, 138.8, 134.3, 132.2, 129.6, 128.0, 127.0, 126.0, 124.4, 79.1, 58.7, 46.2, 32.4, 28.4, 22.9. All spectroscopic data is in agreement with those previously reported.<sup>[8]</sup> HRMS (ESI) calculated for  $\text{C}_{17}\text{H}_{22}\text{ClNNaO}_2$   $[(\text{M}+\text{Na})^+]$ : 330.1231, found: 330.1231. HPLC (Daicel Chiralpak AD-H column, *n*-hexane/isopropanol = 90/10, flow rate 1.0 mL/min, 254 nm):  $t_R$  (minor) = 4.6 min,  $t_R$  (major) = 5.6 min.

<Chromatogram>  
mAU

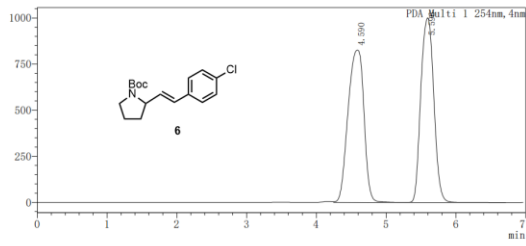

<Peak Table>

| No.   | Ret. Time (min) | Height (uAU) | Height% | Area (uAU*min) | Area%   |
|-------|-----------------|--------------|---------|----------------|---------|
| 1     | 4.590           | 826404       | 45.232  | 13051970       | 50.124  |
| 2     | 5.596           | 1000619      | 54.768  | 12987415       | 49.876  |
| Total |                 | 1827023      | 100.000 | 26039384       | 100.000 |

<Chromatogram>  
mAU

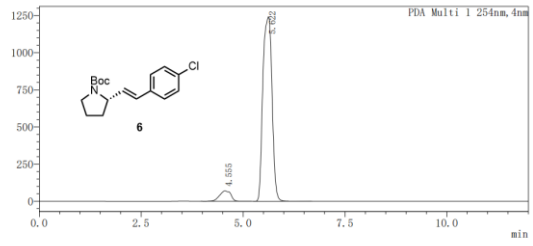

<Peak Table>

| No.   | Ret. Time (min) | Height (uAU) | Height% | Area (uAU*min) | Area%   |
|-------|-----------------|--------------|---------|----------------|---------|
| 1     | 4.555           | 69659        | 5.310   | 1328620        | 6.398   |
| 2     | 5.622           | 1242207      | 94.690  | 19436732       | 93.602  |
| Total |                 | 1311866      | 100.000 | 20765352       | 100.000 |

## 6. Nonlinear Effect Study

In general, nonlinear effect study began with standard conditions (0.1 mmol), but the ratio of chiral ligands **GF2** and *ent*-**GF2** is various. They were weighed accurately on the analytical balance and the reaction was carried out according to general procedure. The results are listed below.

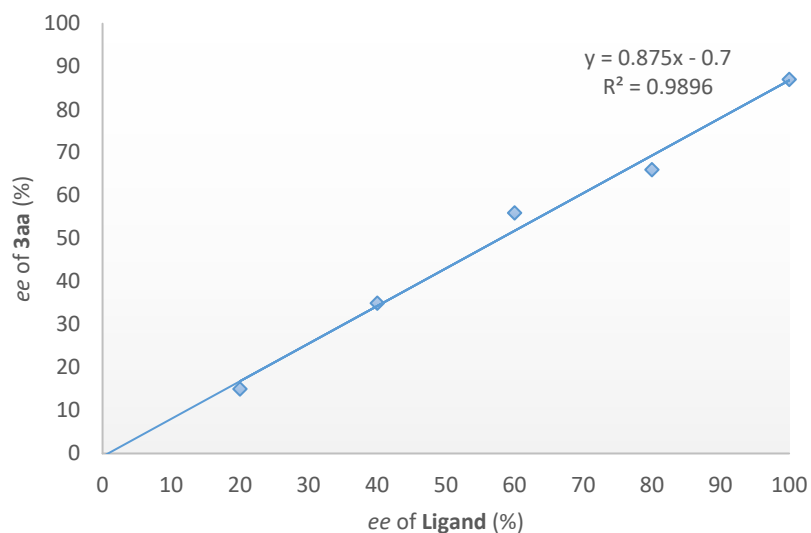

| entry                      | 1       | 2       | 3       | 4       | 5   |
|----------------------------|---------|---------|---------|---------|-----|
| <b>GF2/ent-GF2 (ratio)</b> | 0.6/0.4 | 0.7/0.3 | 0.8/0.2 | 0.9/0.1 | 1   |
| <b>ee of Ligand (%)</b>    | 20      | 40      | 60      | 80      | 100 |
| <b>ee of 3aa (%)</b>       | 15      | 35      | 56      | 66      | 87  |



## 7. References

1. C.-L. Ma, X.-L. Yu, X.-L. Zhu, Y.-Z. Hu, X.-W. Dong, B. Tan, X.-Y. Liu, *Adv. Synth. Catal.* **2015**, *357*, 569-575.
2. H. Lu, C. Li, H. Jiang, C. L. Lizardi, X. P. Zhang, *Angew. Chem. Int. Ed.* **2014**, *53*, 7028-7032.
3. A. Khanna, C. Maung, K. R. Johnson, T. T. Luong, Van Vranken, D. L. *Org. Lett.* **2012**, *14*, 3233-3235.
4. A.-J. Xia, T.-R. Kang, L. He, L.-M. Chen, W.-T. Li, J.-L. Yang, Q.-Z. Liu, *Angew. Chem. Int. Ed.* **2016**, *55*, 1441-1444.
5. A. Becker, C. P. Grugel, B. Breit, *Org. Lett.* **2021**, *23*, 3788-3792.
6. C. E. Sear, P. Pieper, M. Amaral, M. M. Romanelli, T. A. Costa-Silva, M. M. Haugland, J. A. Tate, J. H. G. Lago, A. G. Tempone, E. A. Anderson, *ACS Infect. Dis.* **2020**, *6*, 2872-2878.
7. N. J. Taylor, E. Emer, S. Preshlock, M. Schedler, M. Tredwell, S. Verhoog, J. Mercier, C. Genicot, V. Gouverneur, *J. Am. Chem. Soc.* **2017**, *139*, 8267-8276.
8. H. Zhang, C. Huang, X.-A. Yuan, S. Yu, *J. Am. Chem. Soc.* **2022**, *144*, 10958-10967.

## 8. X-ray Single Crystal Data for Compound 3ac

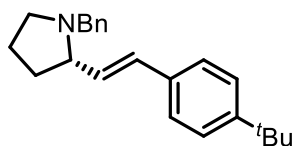

(S)-3ac

≡

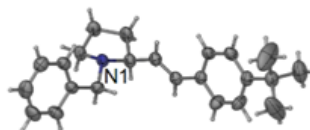

CCDC 2129469

|                                             |                                                               |
|---------------------------------------------|---------------------------------------------------------------|
| Identification code                         | exp_2405                                                      |
| Empirical formula                           | C <sub>23</sub> H <sub>29</sub> N                             |
| Formula weight                              | 319.47                                                        |
| Temperature/K                               | 173.00(10)                                                    |
| Crystal system                              | monoclinic                                                    |
| Space group                                 | P2 <sub>1</sub>                                               |
| a/Å                                         | 10.9102(3)                                                    |
| b/Å                                         | 6.1038(2)                                                     |
| c/Å                                         | 14.7452(4)                                                    |
| α/°                                         | 90                                                            |
| β/°                                         | 99.500(3)                                                     |
| γ/°                                         | 90                                                            |
| Volume/Å <sup>3</sup>                       | 968.47(5)                                                     |
| Z                                           | 2                                                             |
| ρ <sub>calc</sub> /cm <sup>3</sup>          | 1.096                                                         |
| μ/mm <sup>-1</sup>                          | 0.467                                                         |
| F(000)                                      | 348.0                                                         |
| Crystal size/mm <sup>3</sup>                | 0.38 × 0.24 × 0.12                                            |
| Radiation                                   | CuKα (λ = 1.54184)                                            |
| 2θ range for data collection/°              | 8.216 to 134.116                                              |
| Index ranges                                | -13 ≤ h ≤ 13, -7 ≤ k ≤ 7, -17 ≤ l ≤ 17                        |
| Reflections collected                       | 19273                                                         |
| Independent reflections                     | 3408 [R <sub>int</sub> = 0.0629, R <sub>sigma</sub> = 0.0387] |
| Data/restraints/parameters                  | 3408/1/220                                                    |
| Goodness-of-fit on F <sup>2</sup>           | 1.039                                                         |
| Final R indexes [I ≥ 2σ (I)]                | R <sub>1</sub> = 0.0465, wR <sub>2</sub> = 0.1281             |
| Final R indexes [all data]                  | R <sub>1</sub> = 0.0491, wR <sub>2</sub> = 0.1301             |
| Largest diff. peak/hole / e Å <sup>-3</sup> | 0.37/-0.17                                                    |
| Flack parameter                             | -0.1(4)                                                       |

# 9. <sup>1</sup>H, <sup>13</sup>C, <sup>19</sup>F NMR Spectra

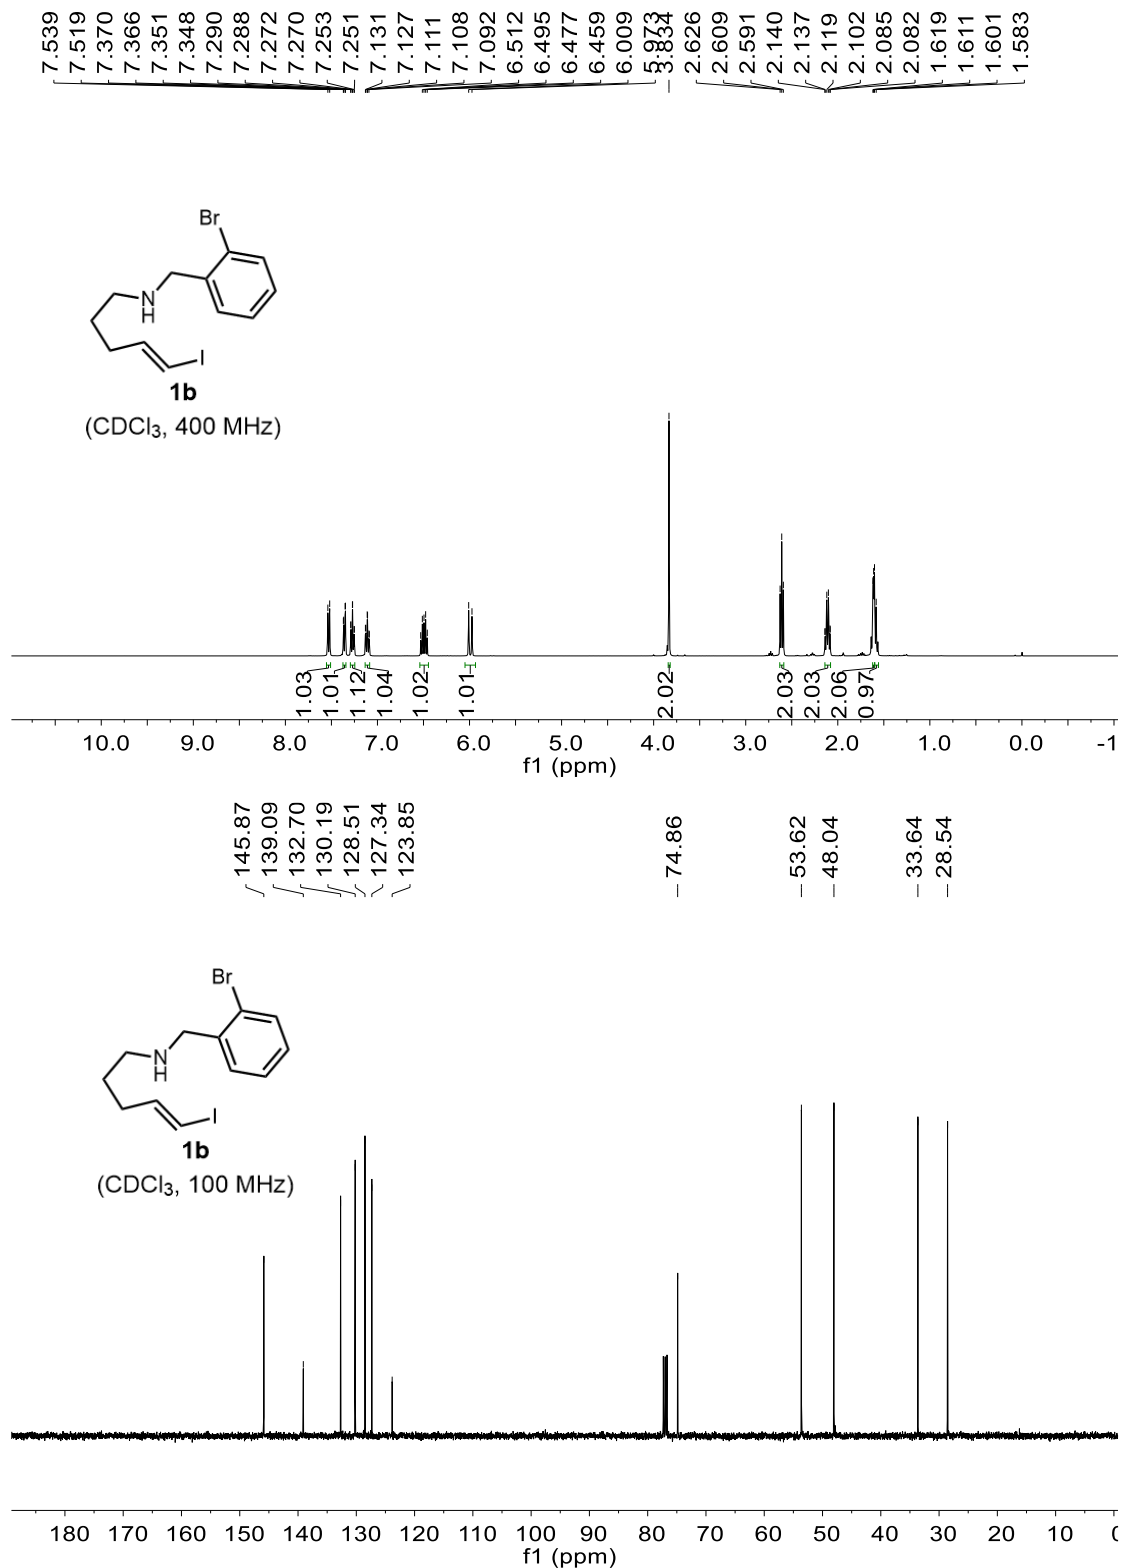

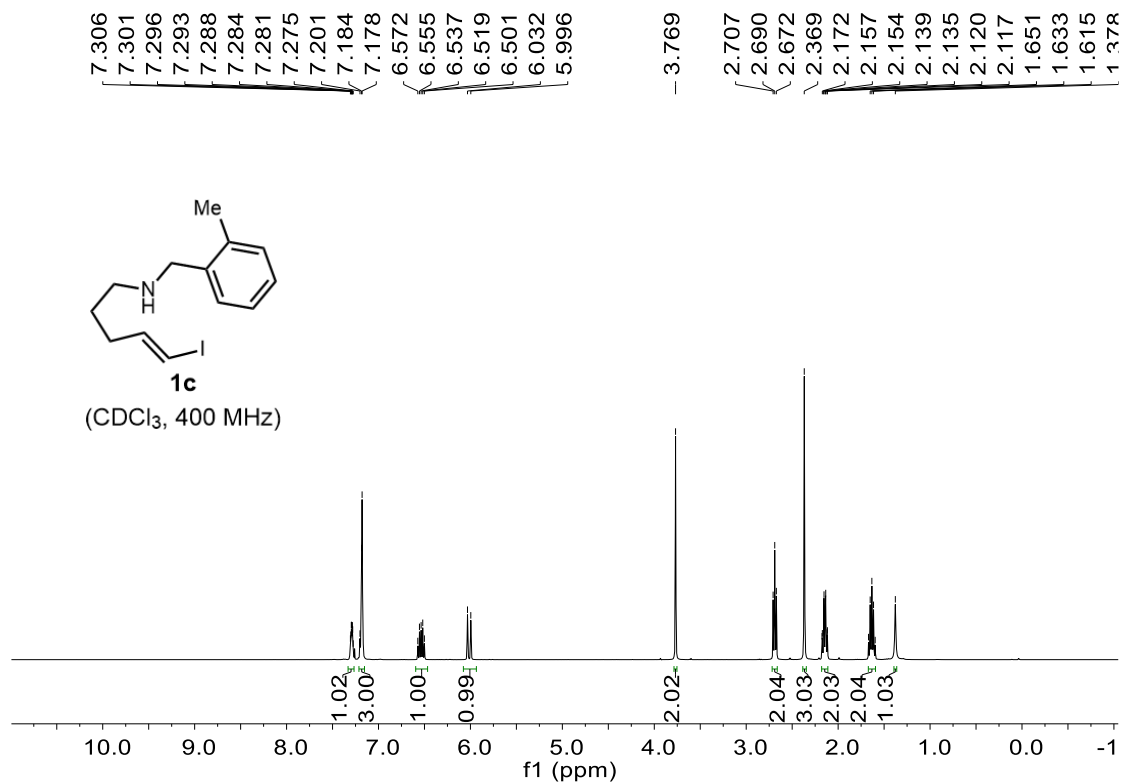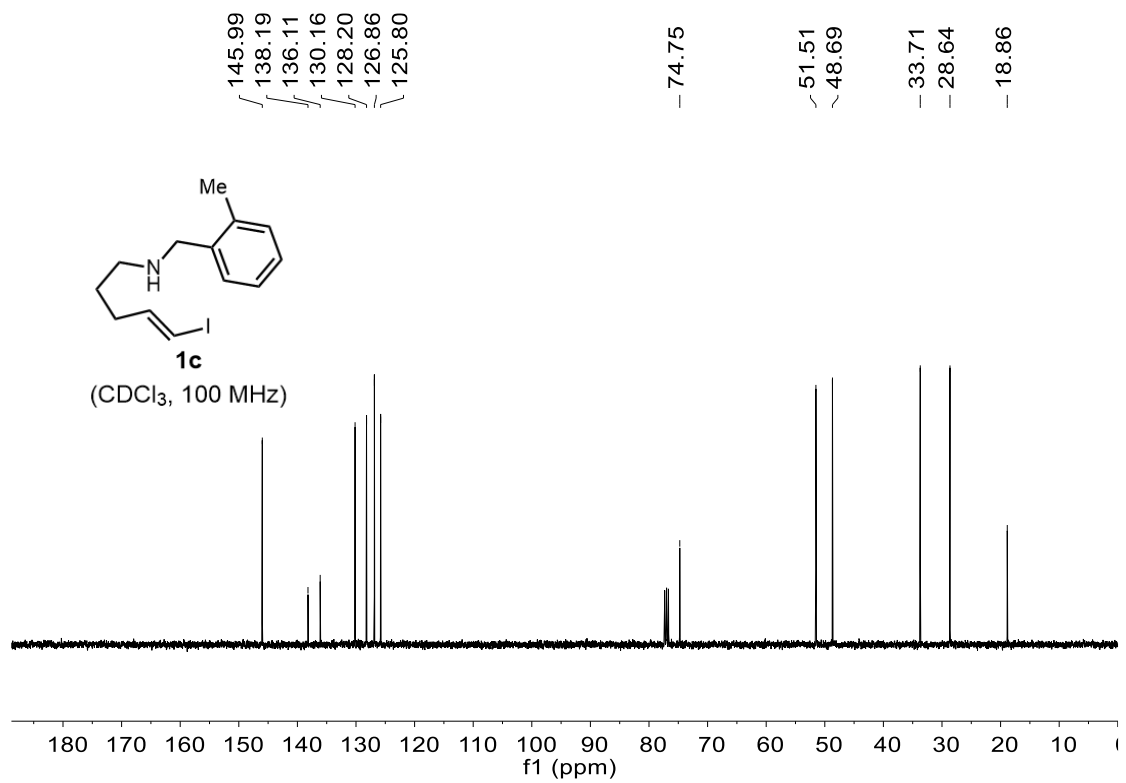

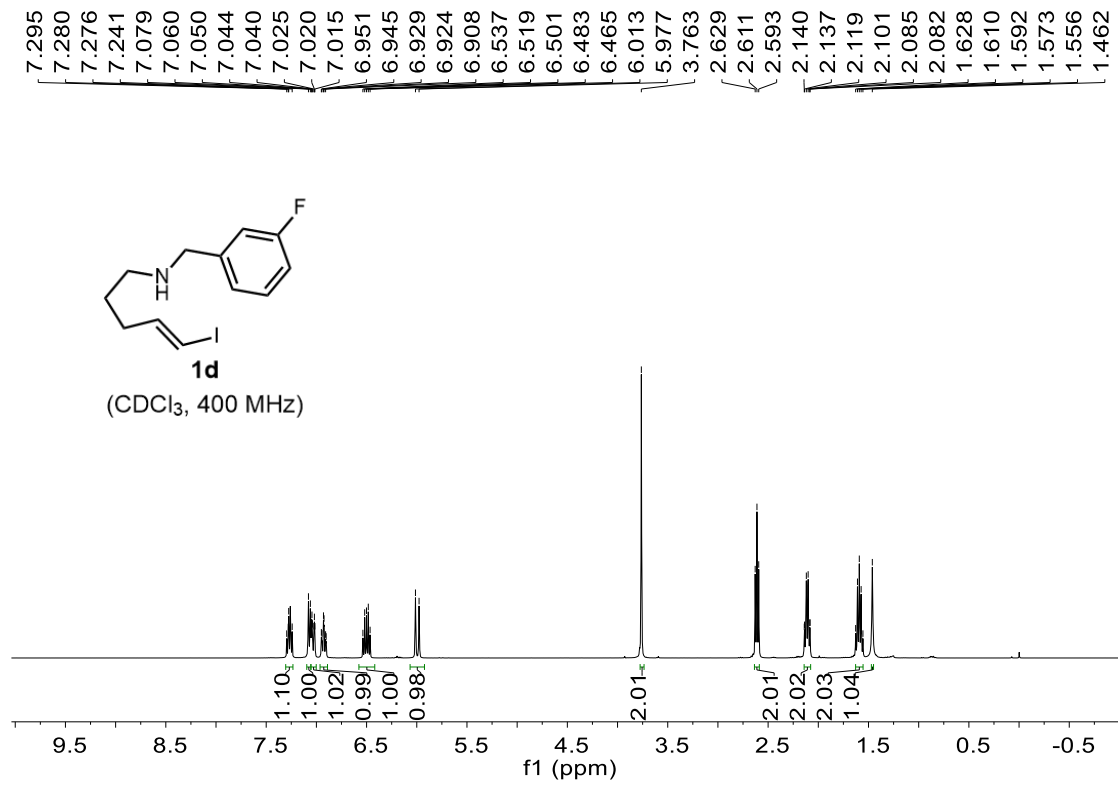

- 164.13
- 161.69
- 145.92
- 143.09
- 143.02
- 129.78
- 129.70
- 123.47
- 123.44
- 114.83
- 114.62
- 113.80
- 113.59
- 74.81
- 53.31
- 53.29
- 48.31
- 33.68
- 28.62

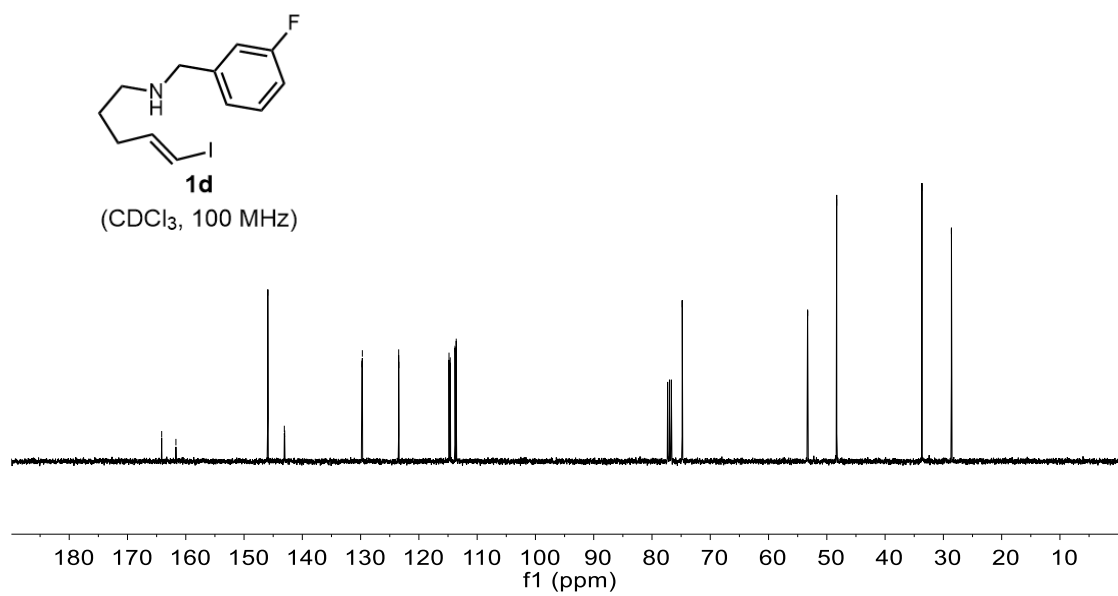

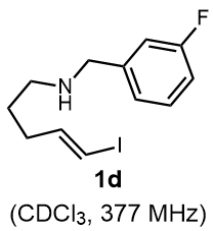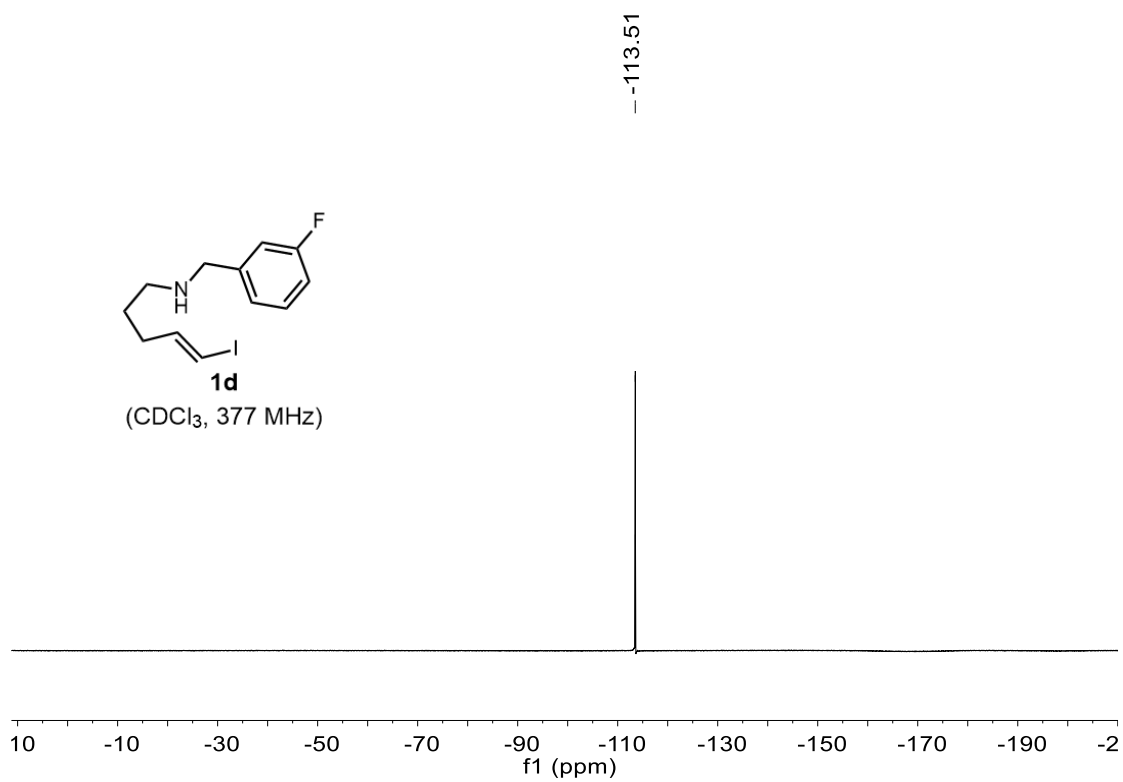

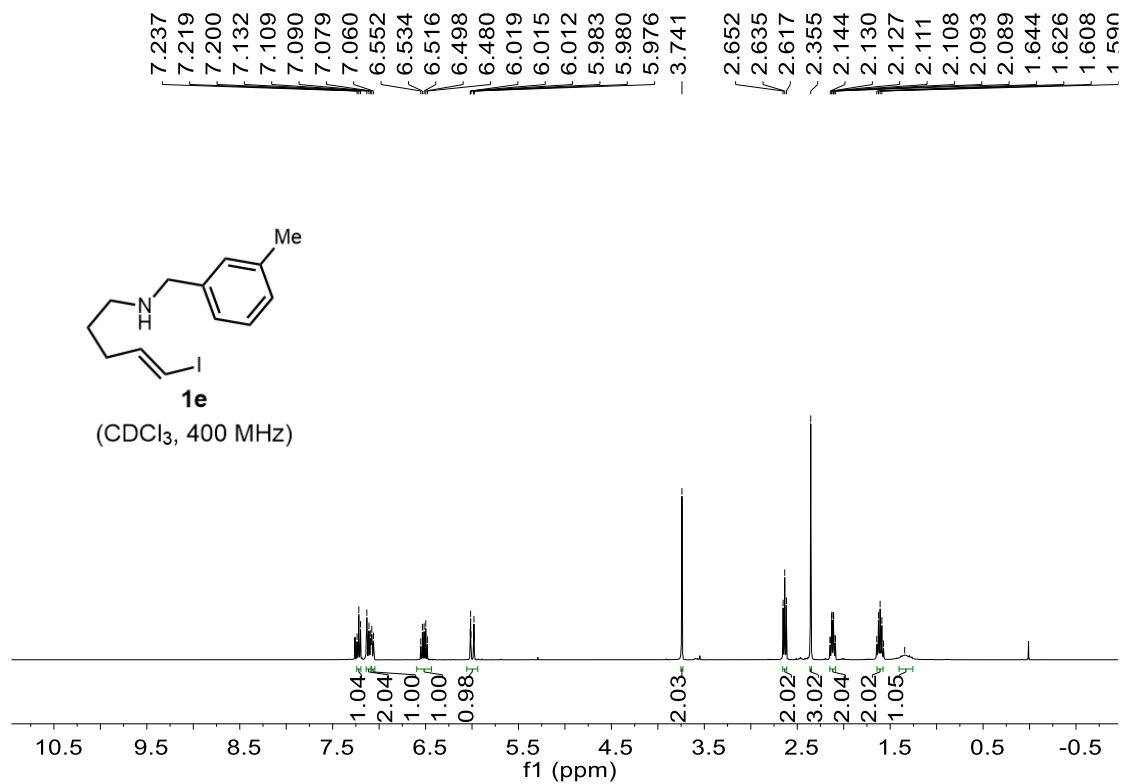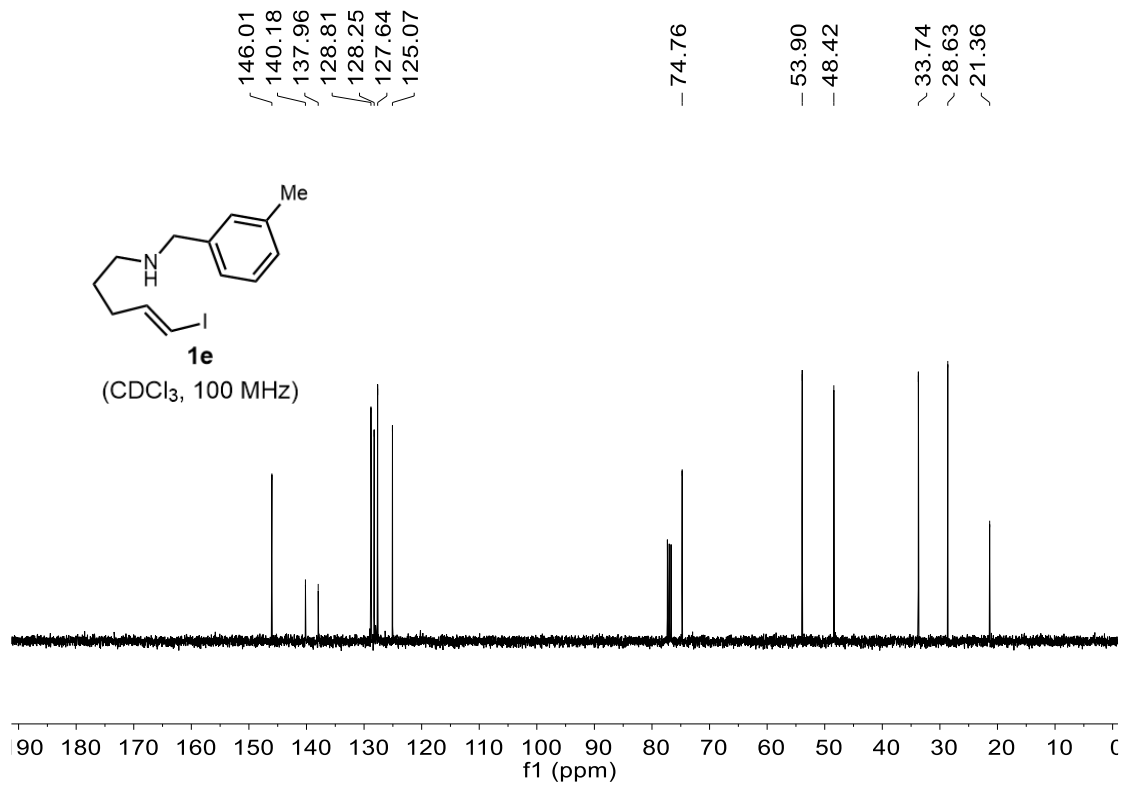

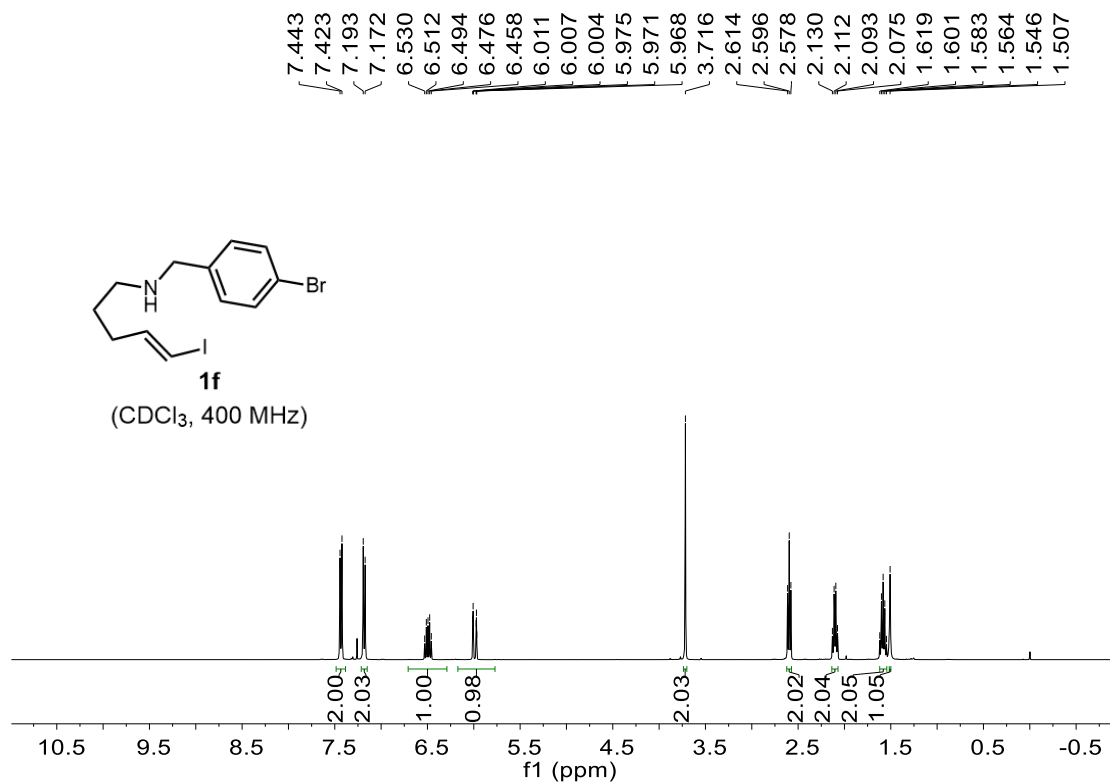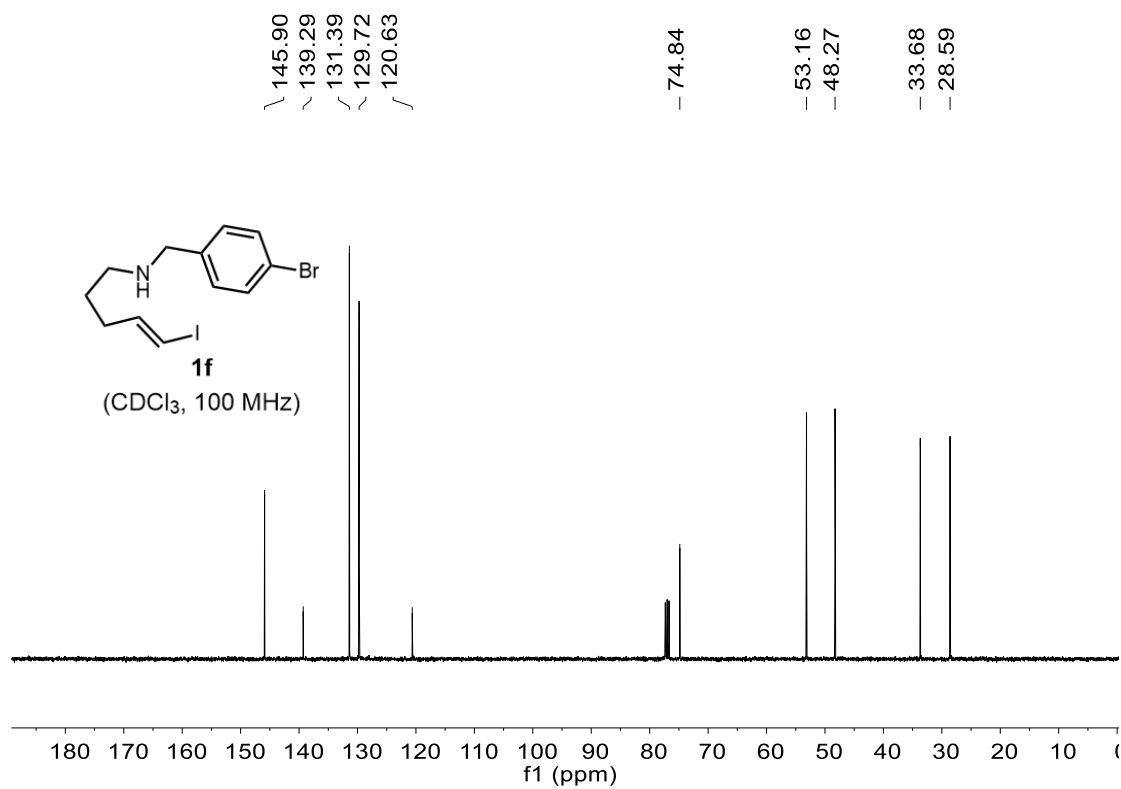



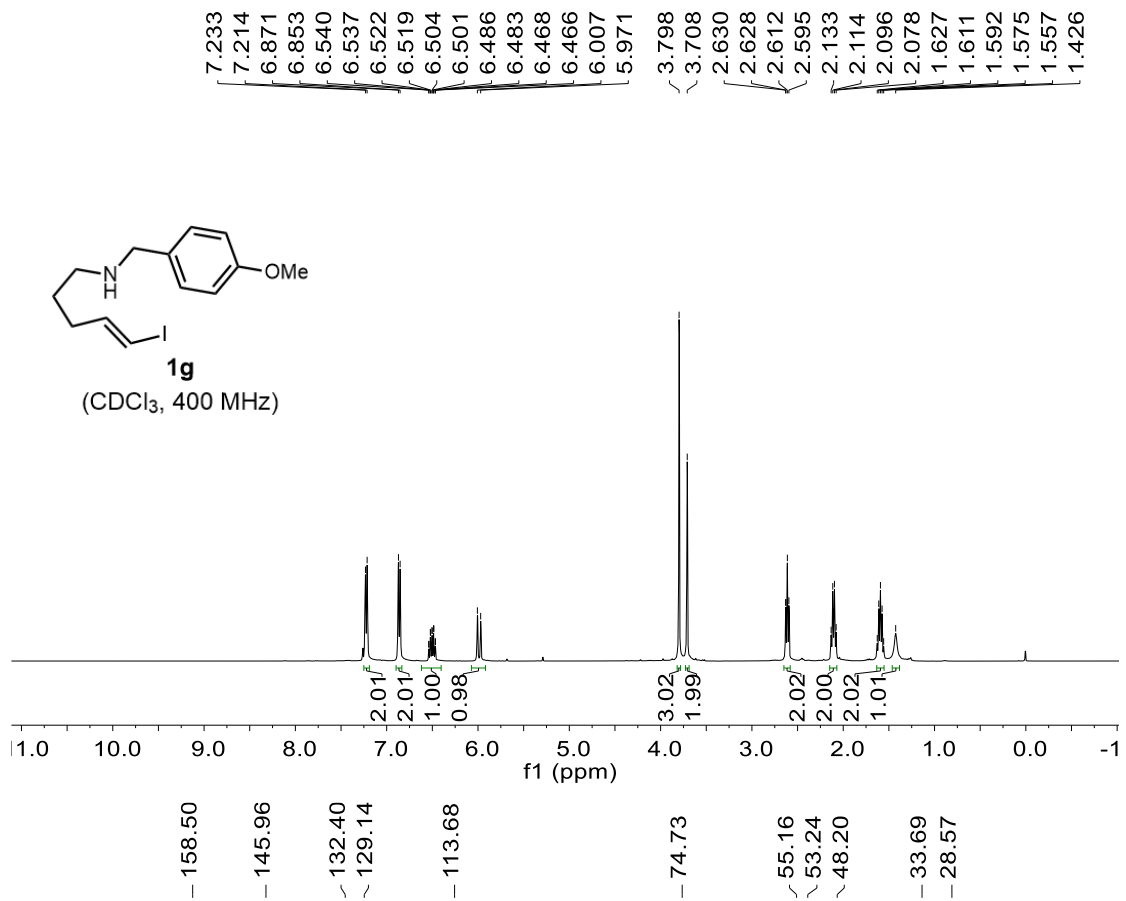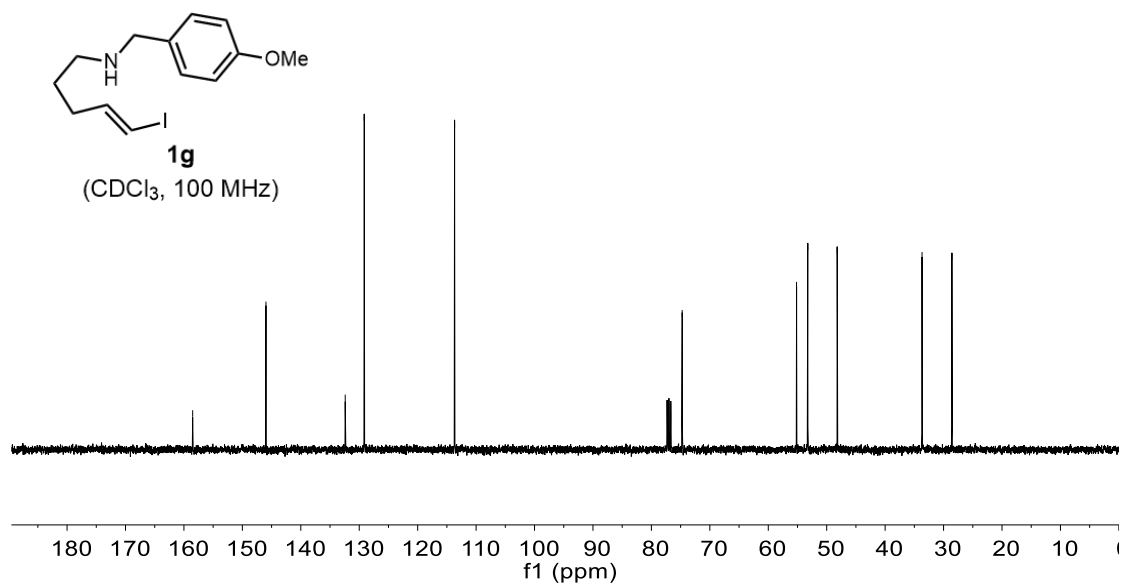

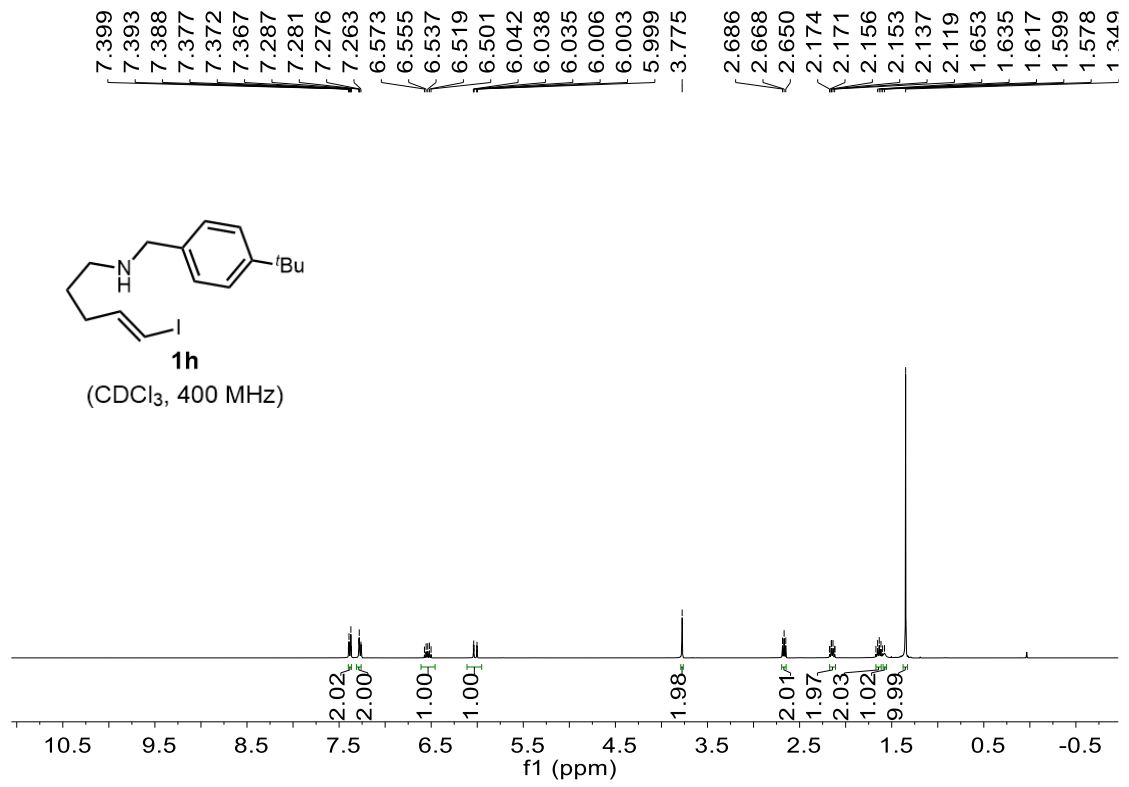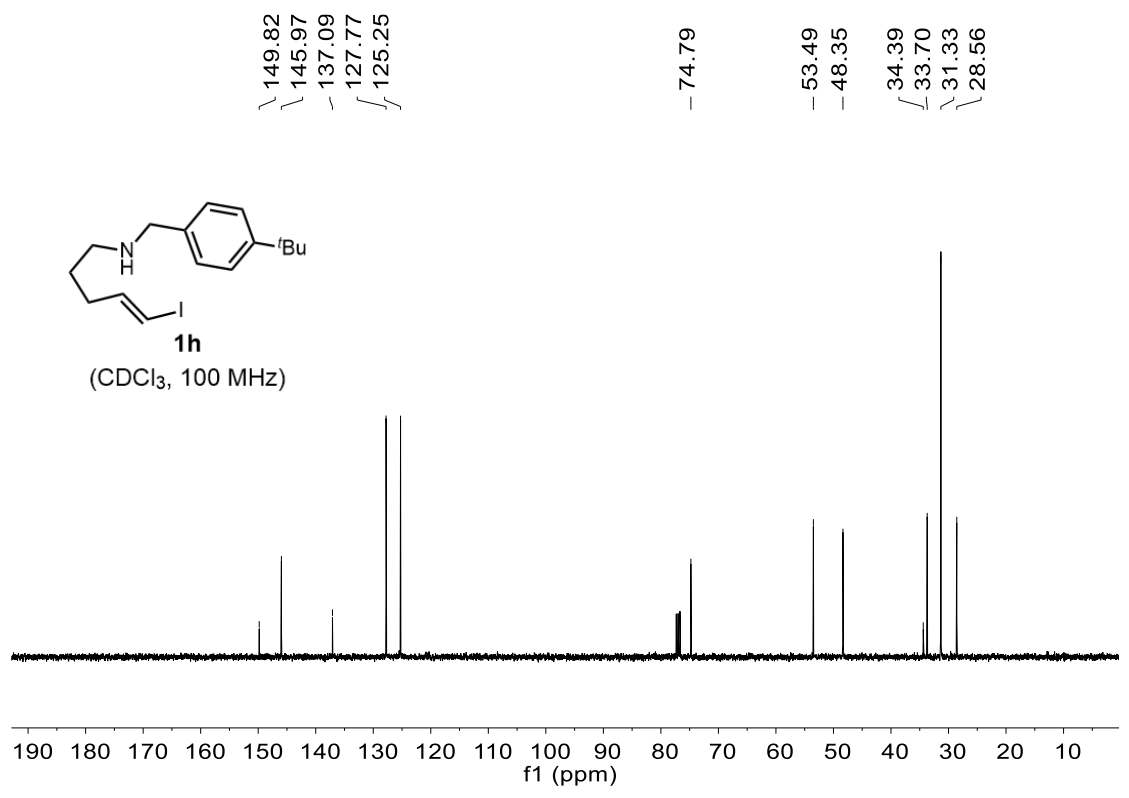

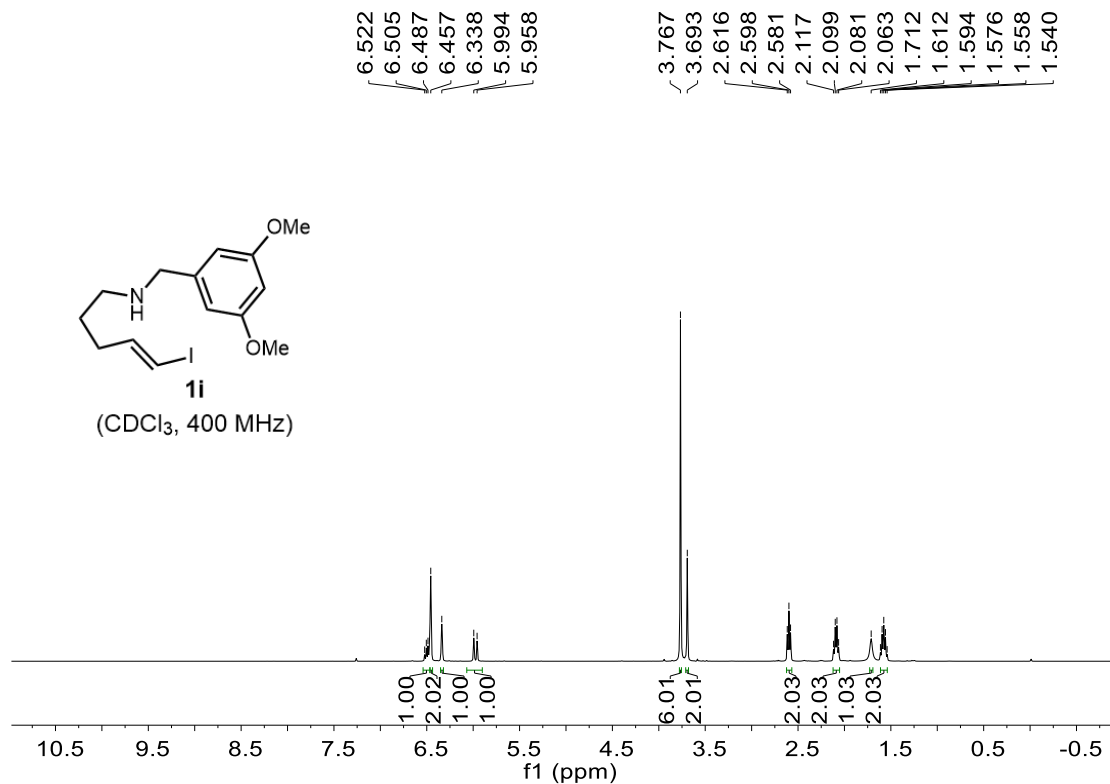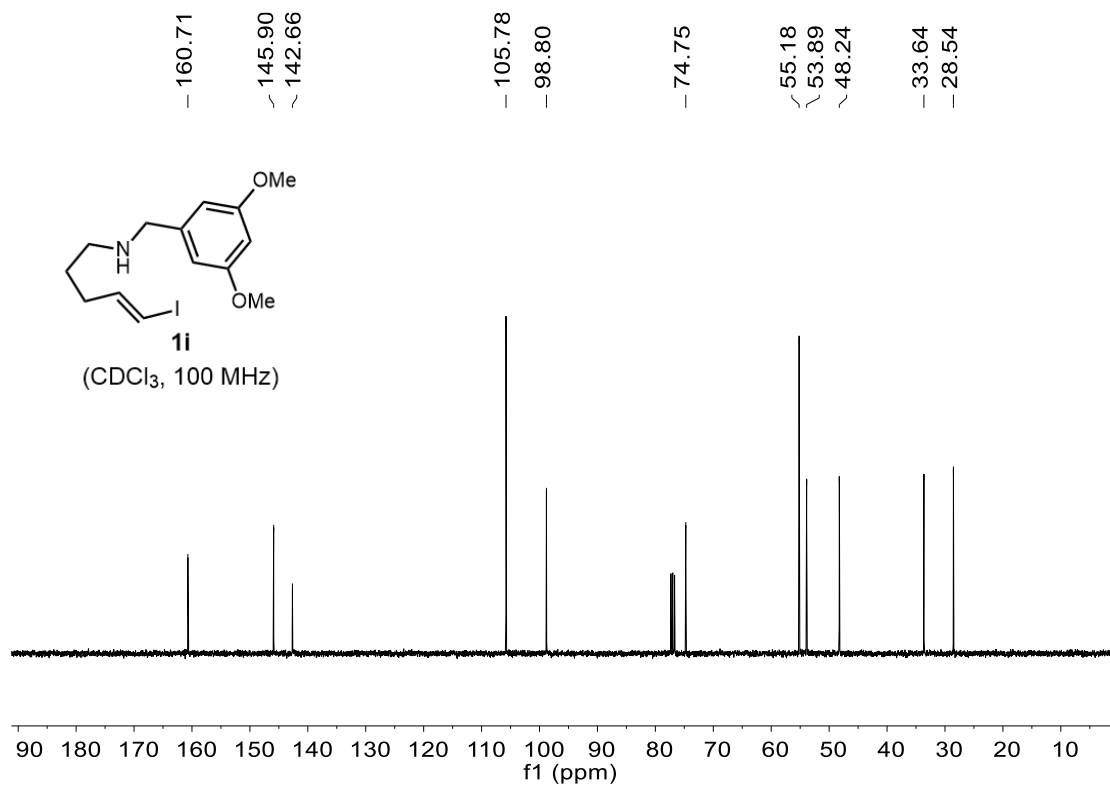

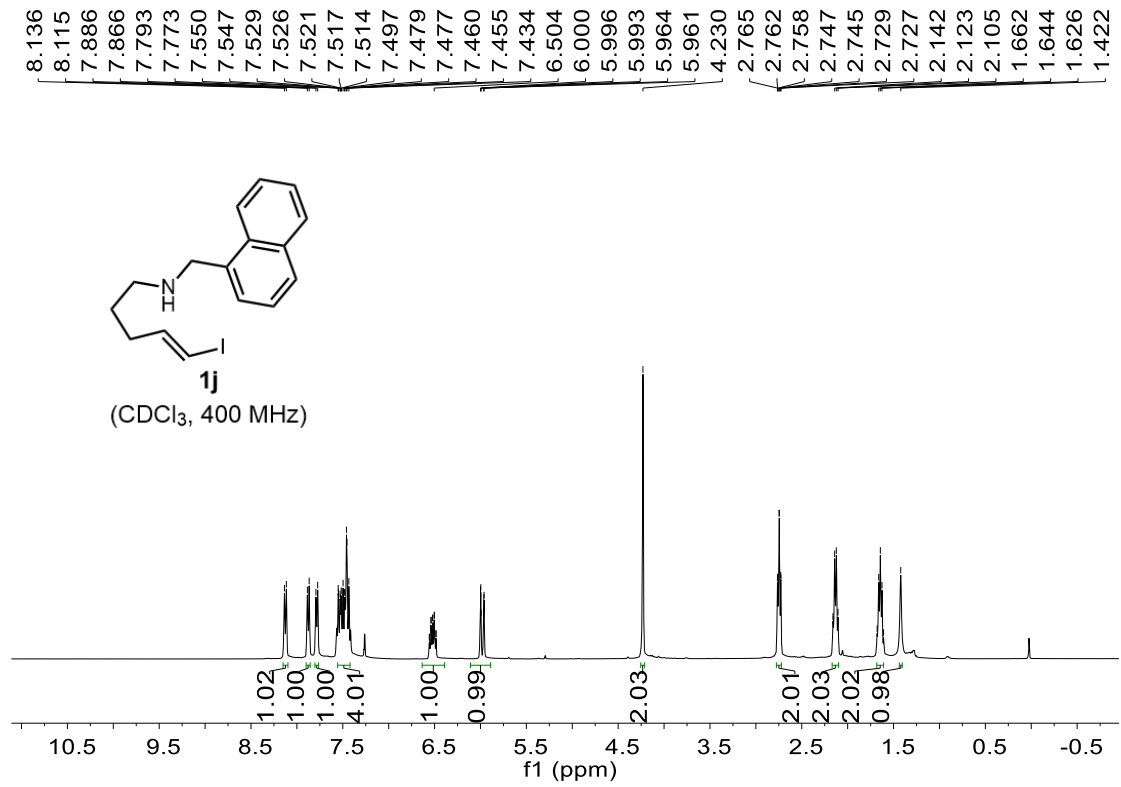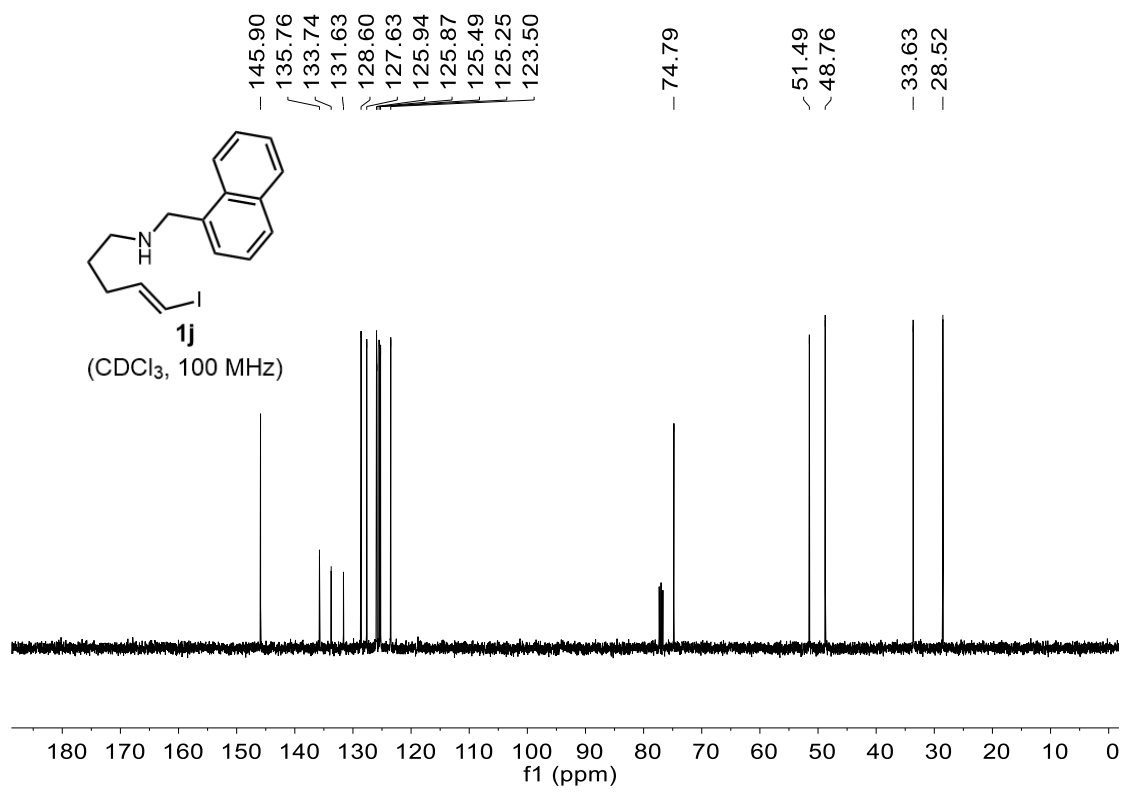

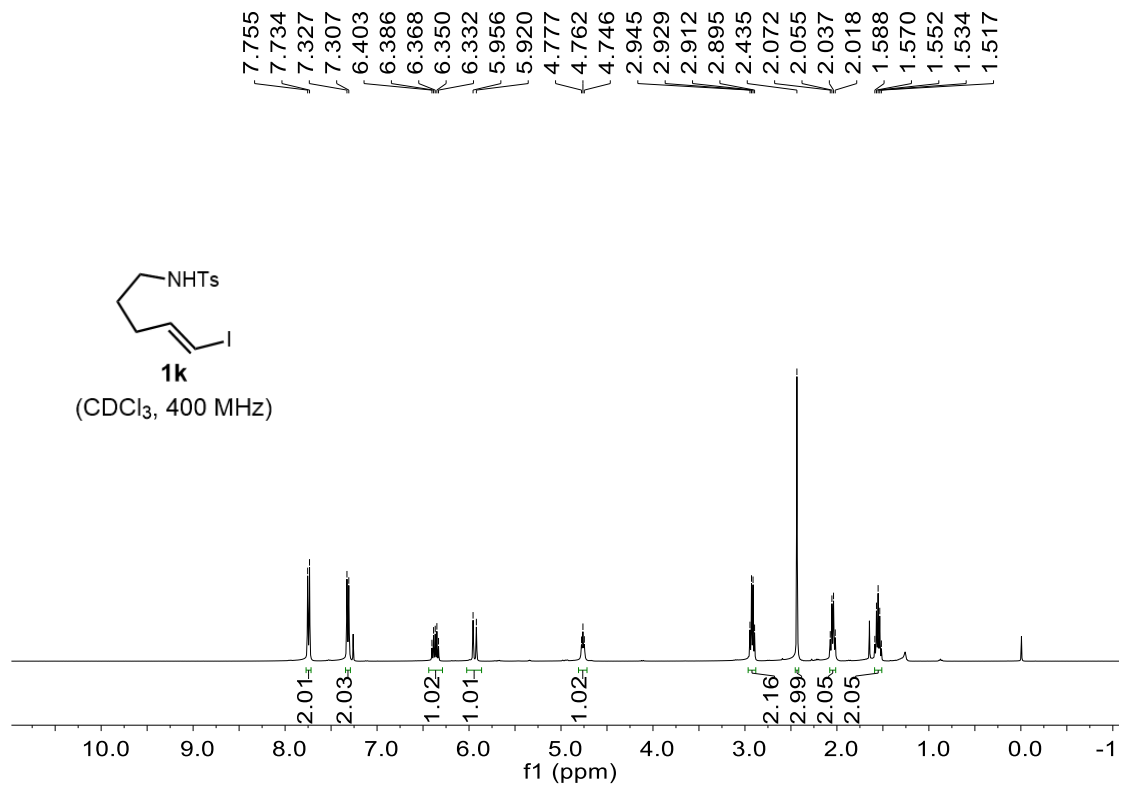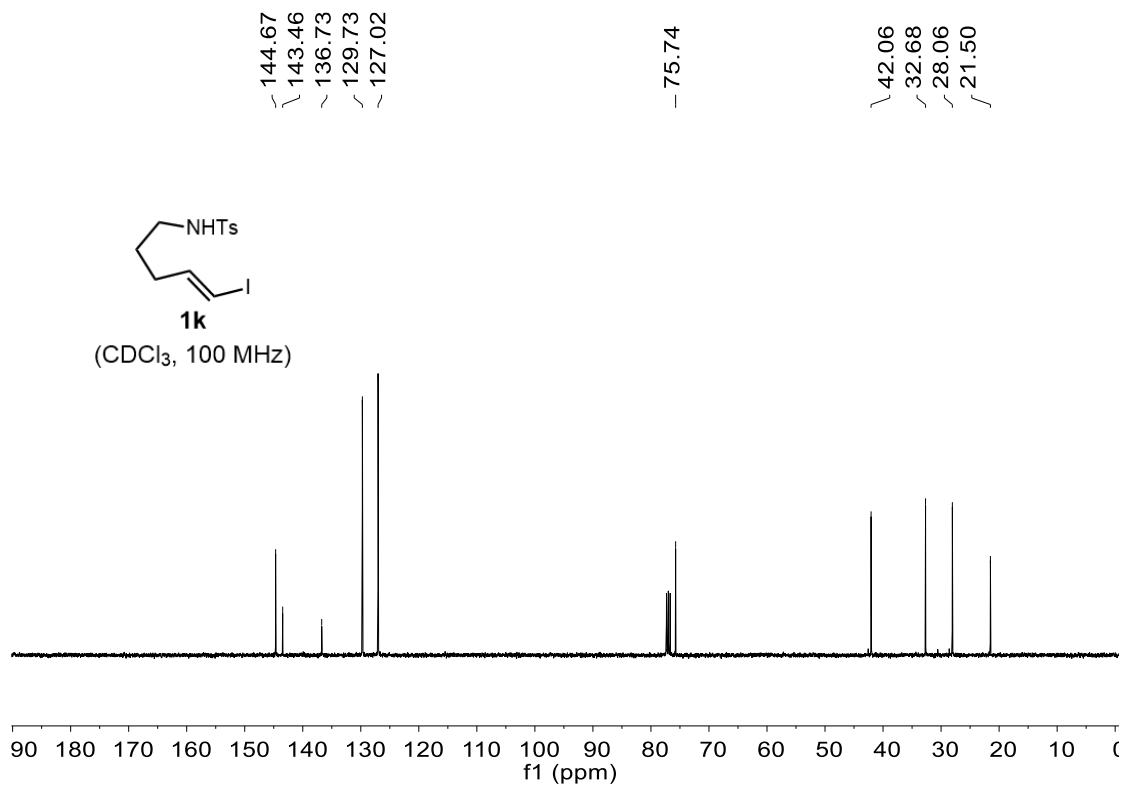

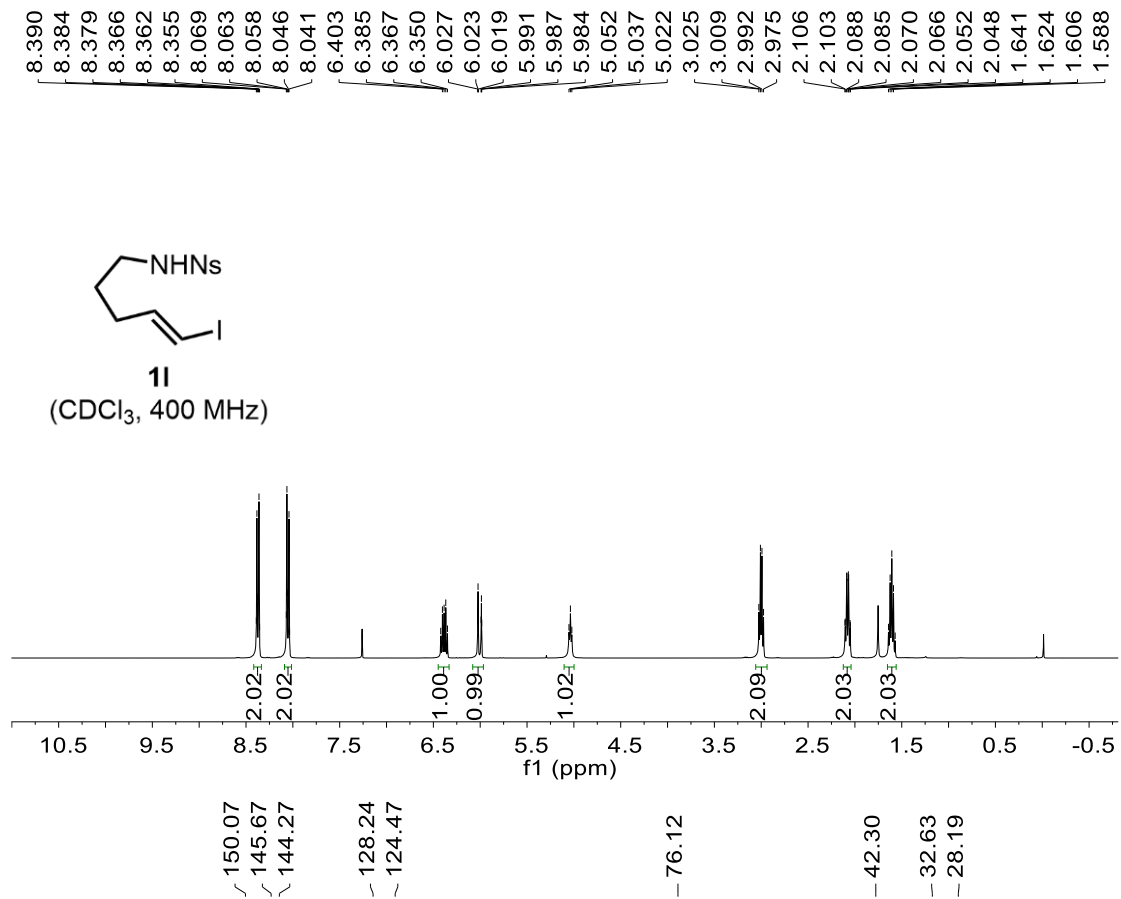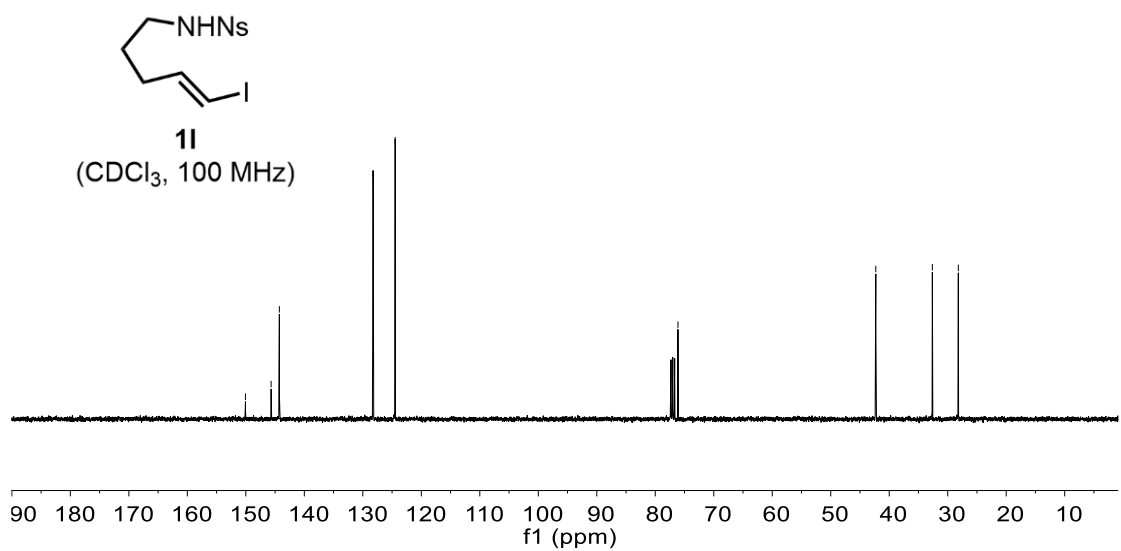

7.216  
7.197  
7.136  
7.111  
7.093  
7.076  
7.057  
6.520  
6.502  
6.484  
6.005  
6.001  
5.997  
5.965  
3.745  
2.641  
2.624  
2.607  
2.352  
2.076  
2.073  
2.058  
2.055  
1.523  
1.518  
1.516  
1.504  
1.501  
1.499  
1.496  
1.484  
1.481  
1.479  
1.475  
1.466  
1.462  
1.457  
1.448  
1.441  
1.436

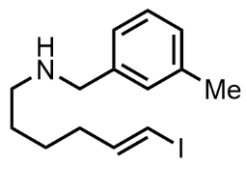

**4c**  
(CDCl<sub>3</sub>, 400 MHz)

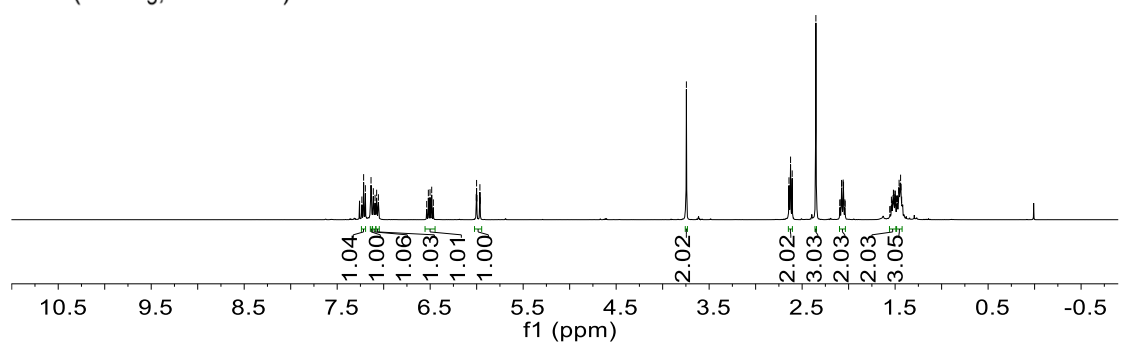

146.31  
140.29  
137.95  
128.82  
128.23  
127.60  
125.08

-74.61  
-54.02  
-49.07  
-35.82  
-29.32  
-26.04  
-21.35

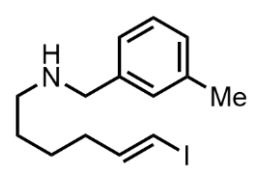

**4c**  
(CDCl<sub>3</sub>, 100 MHz)

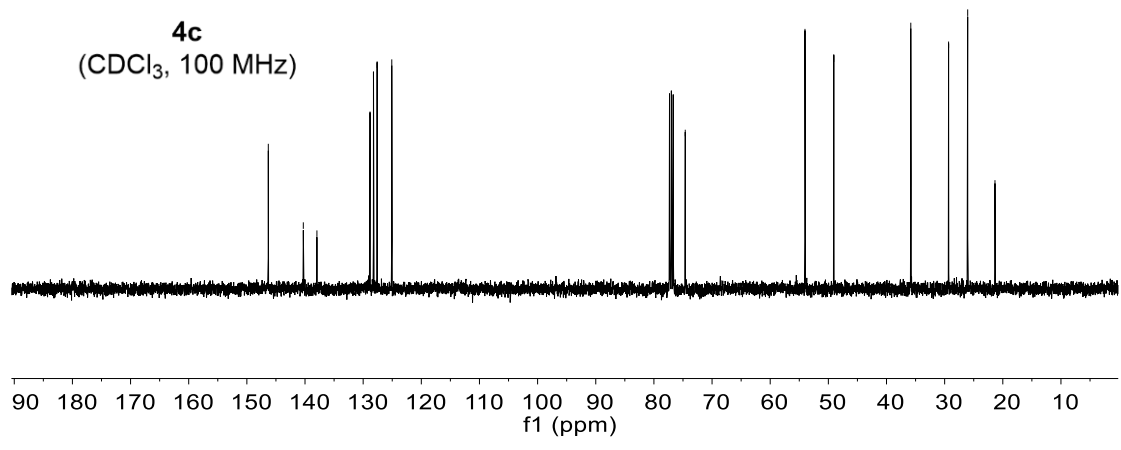

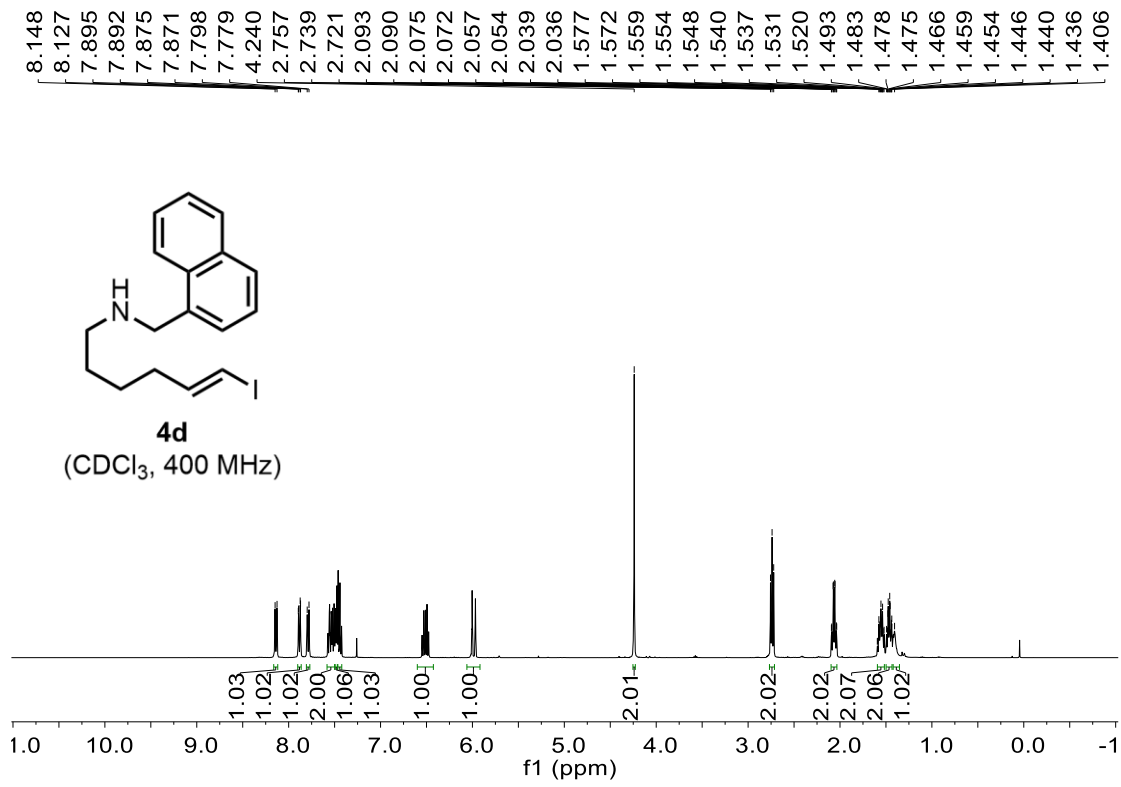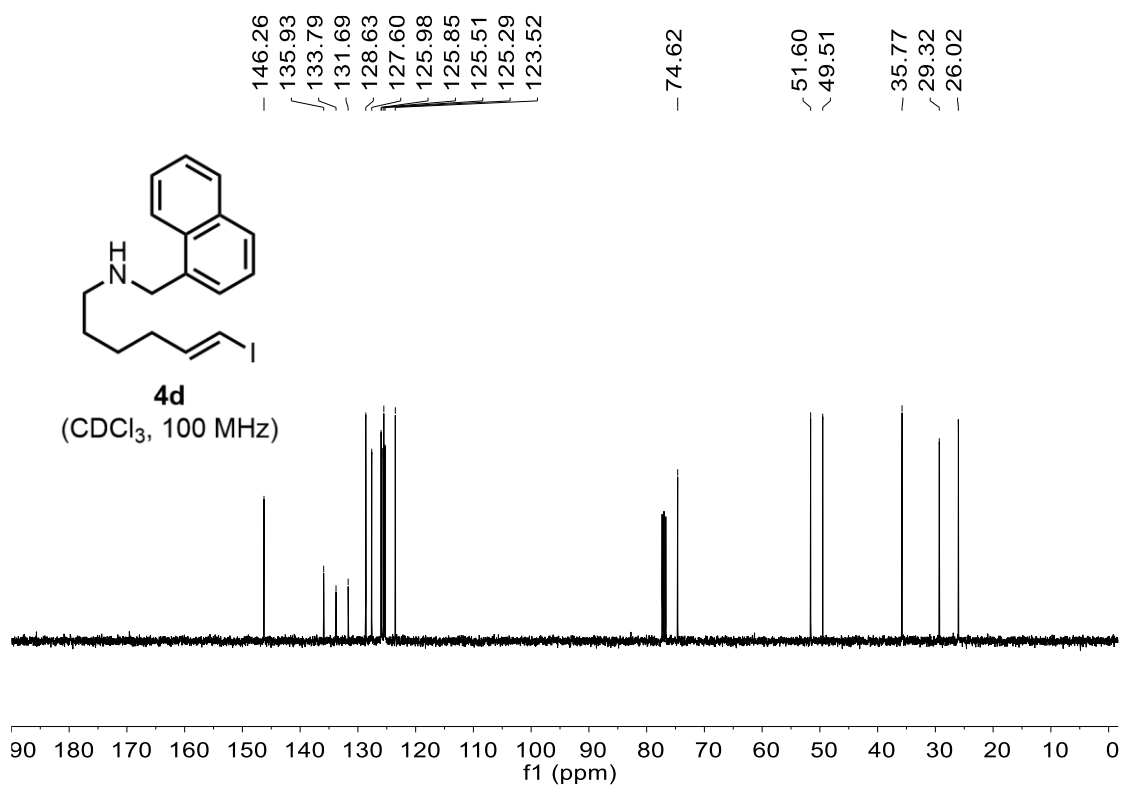



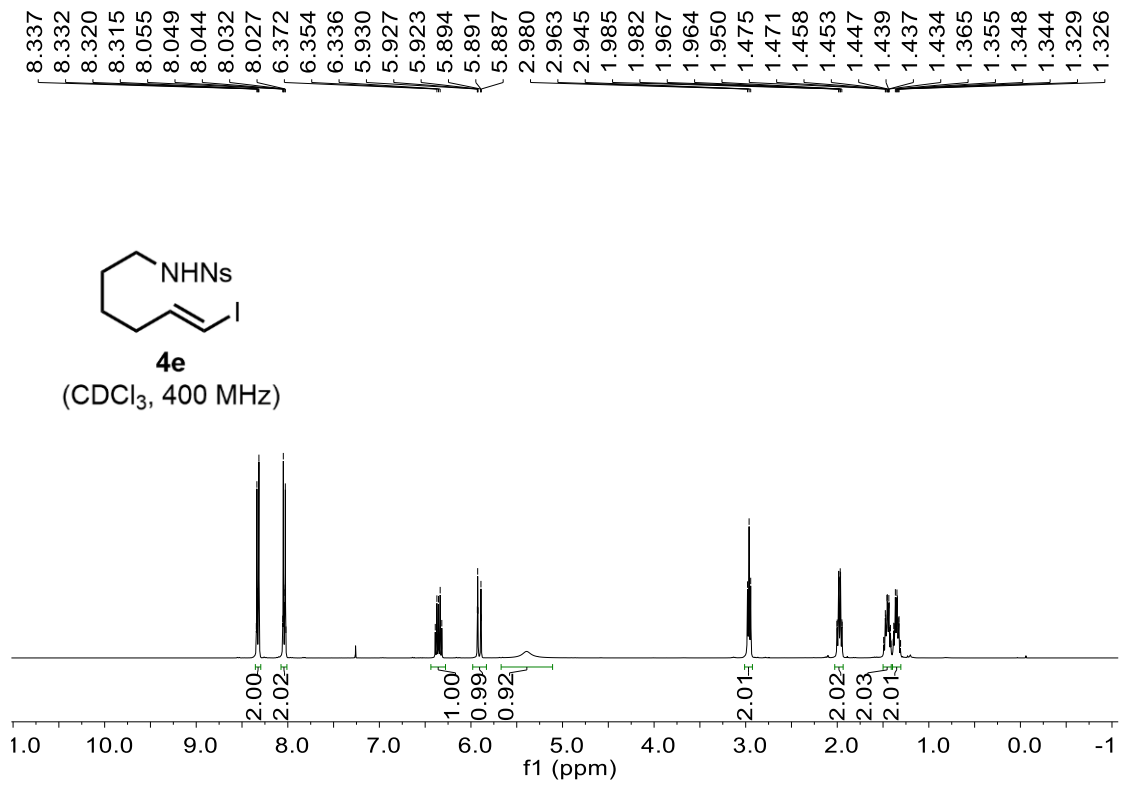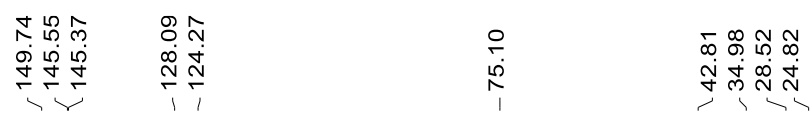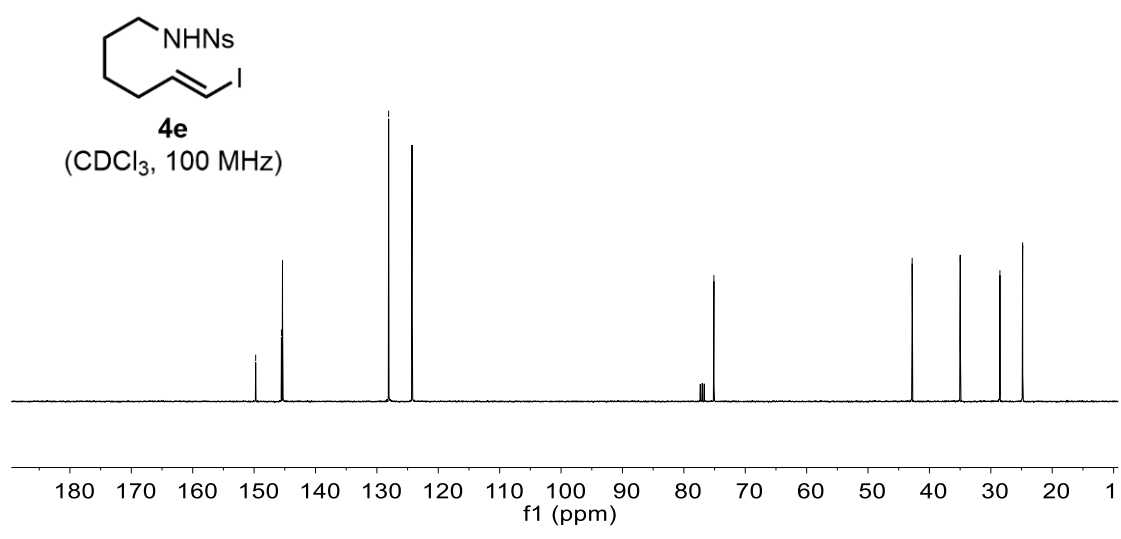

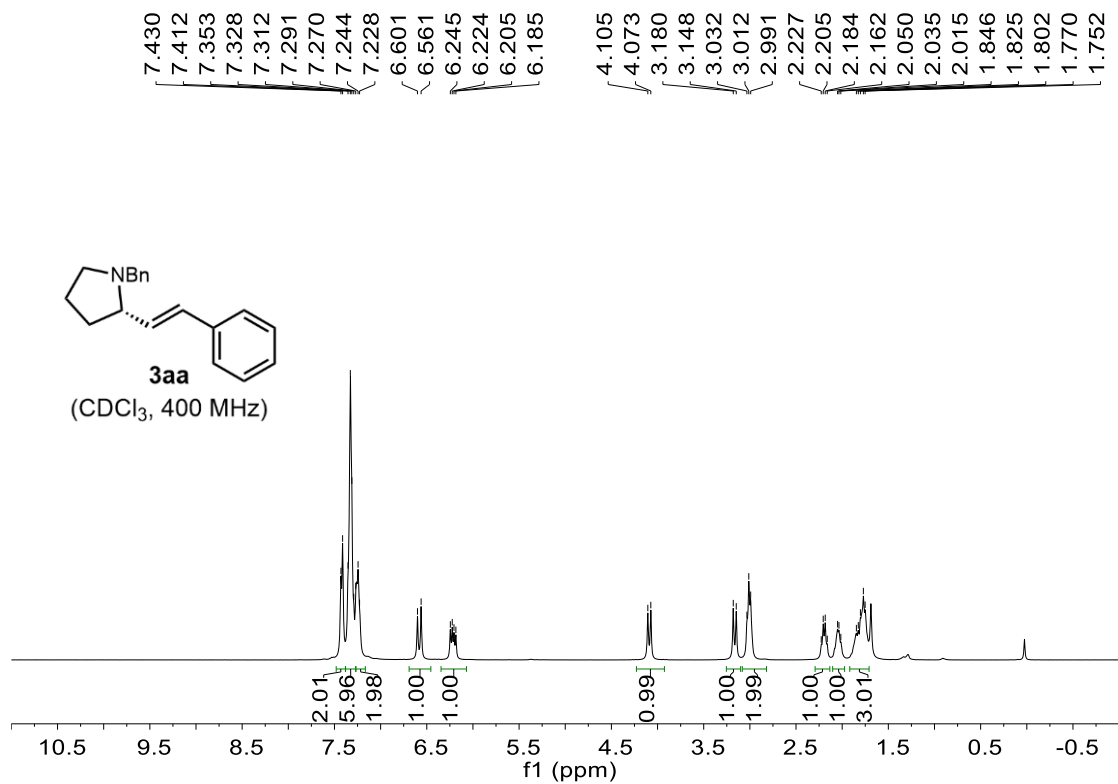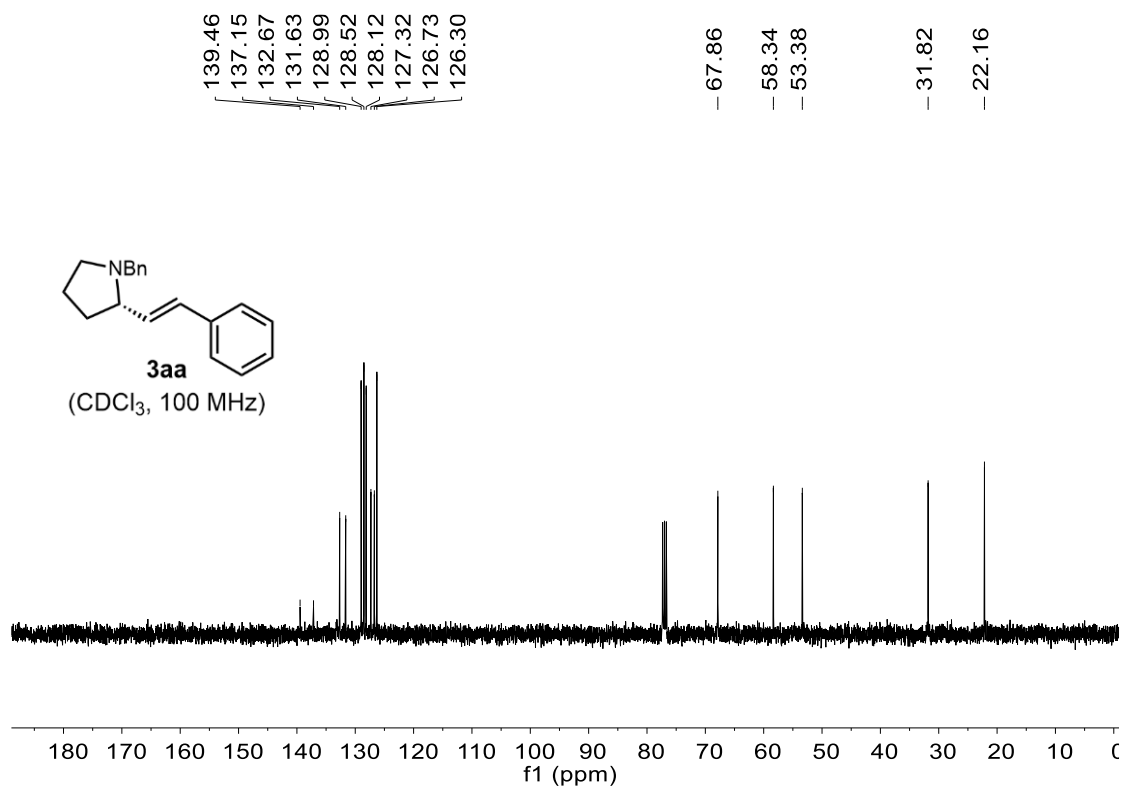

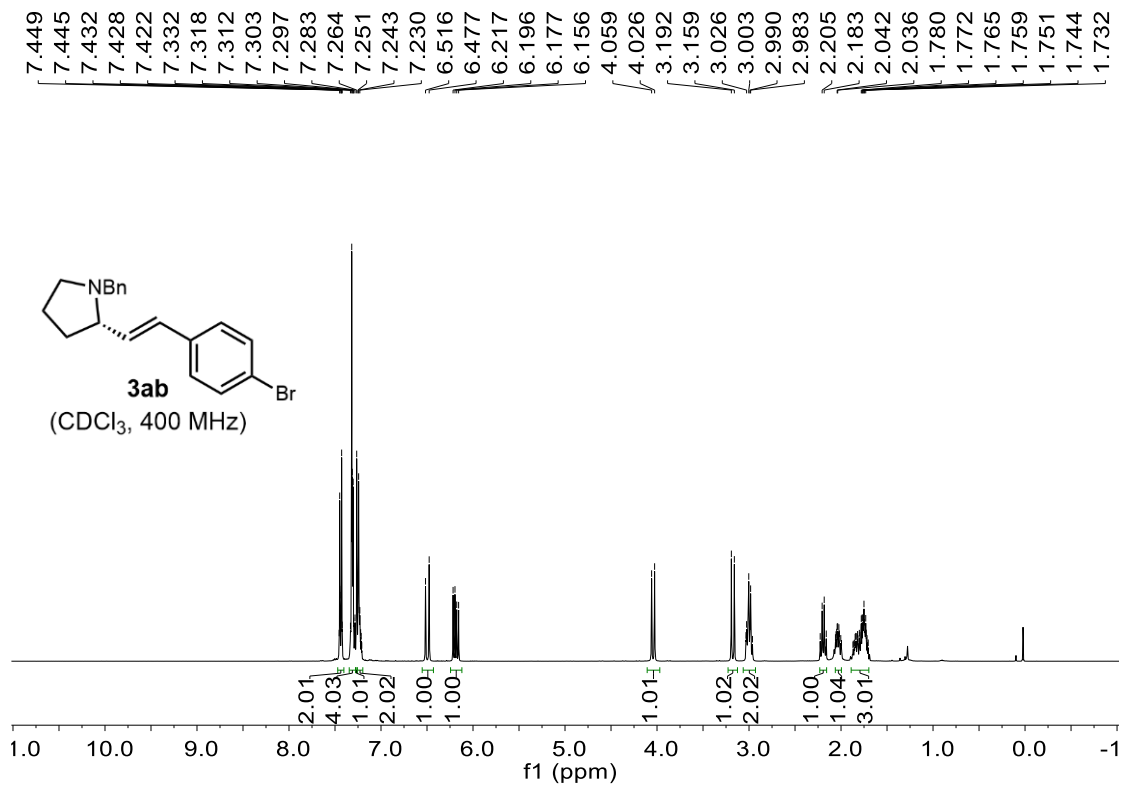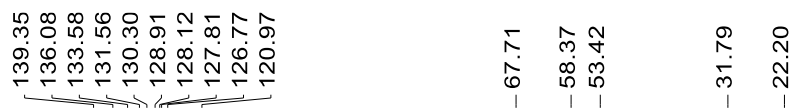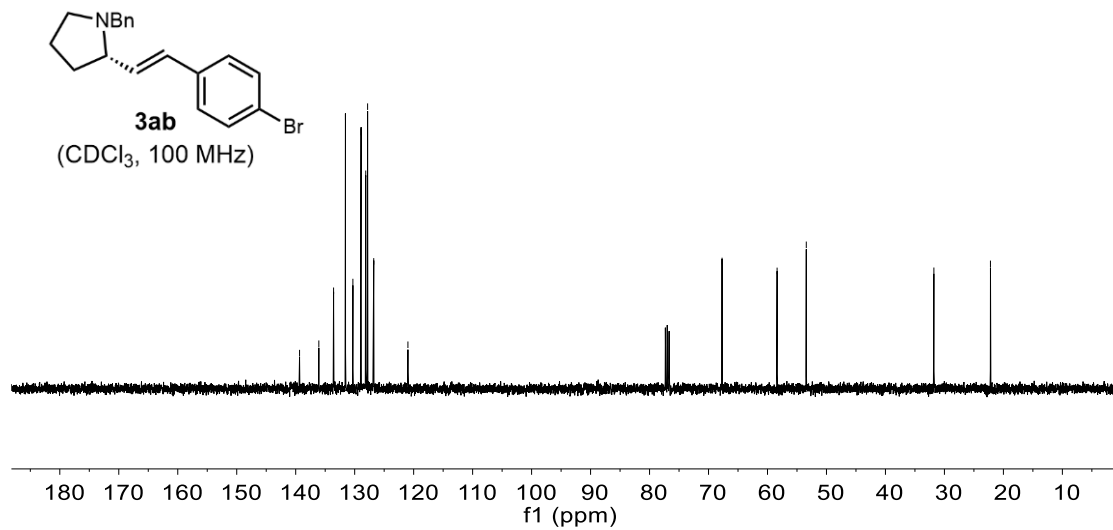

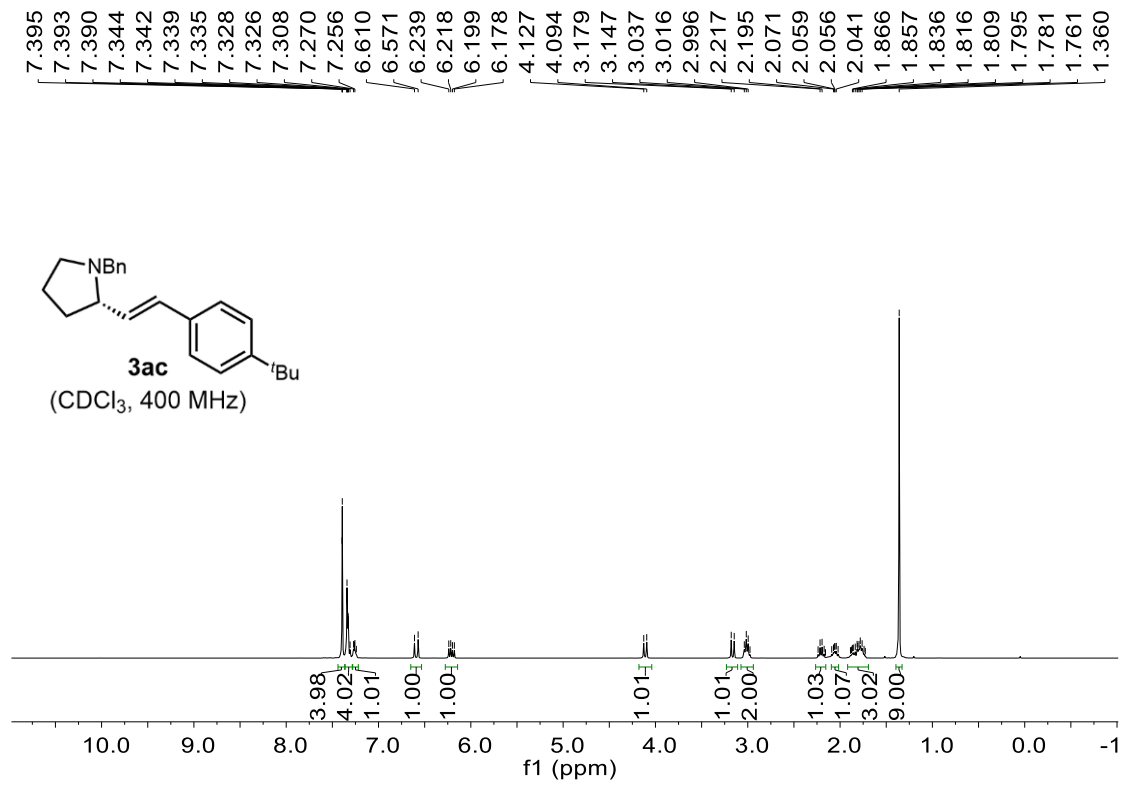

-150.42  
 -139.39  
 -134.35  
 -131.79  
 -131.45  
 -129.02  
 -128.09  
 -126.70  
 -126.01  
 -125.43

-67.89  
 -58.25  
 -53.29  
 -34.51  
 -31.79  
 -31.27  
 -22.10

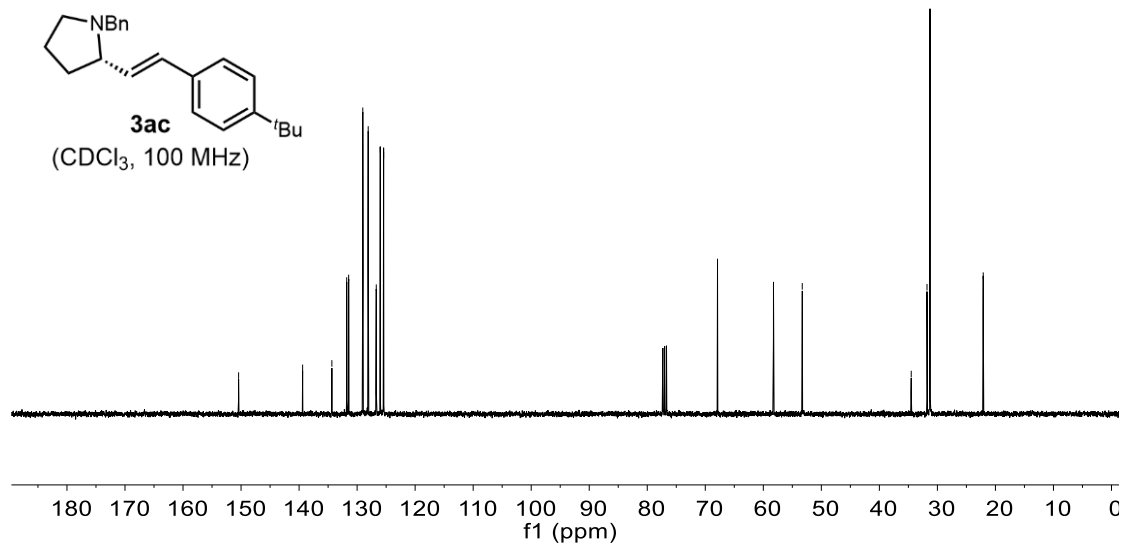

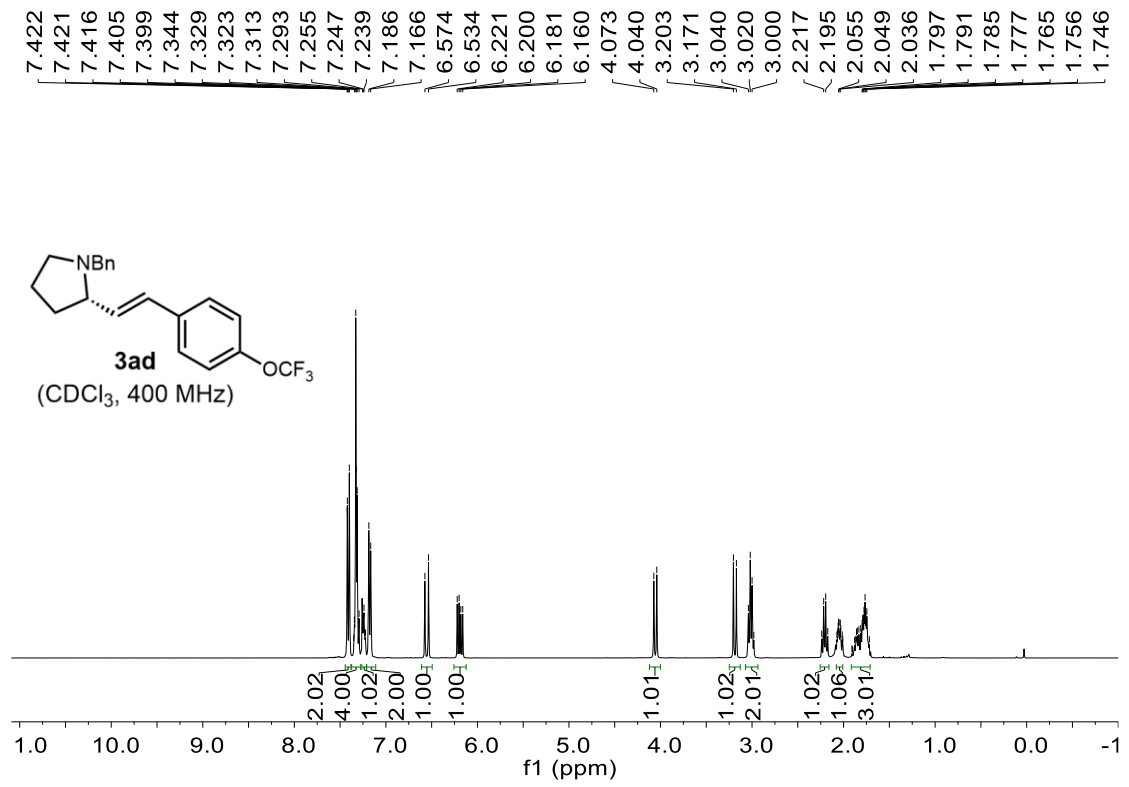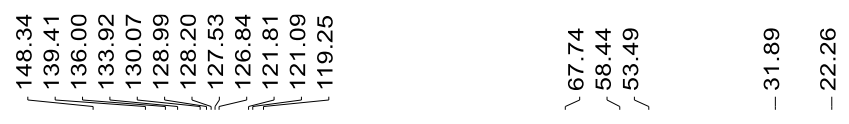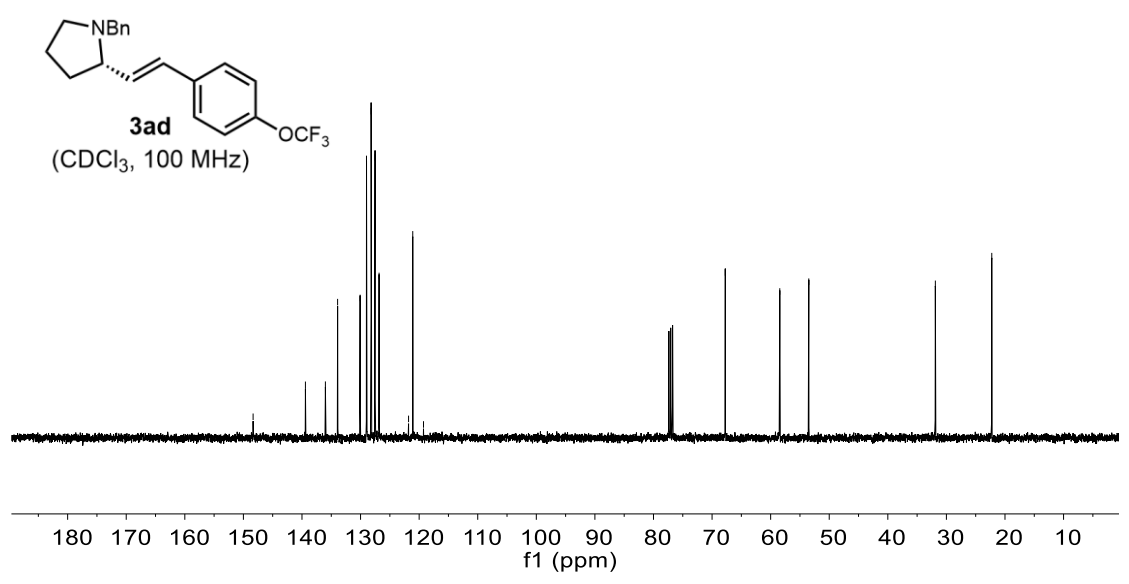

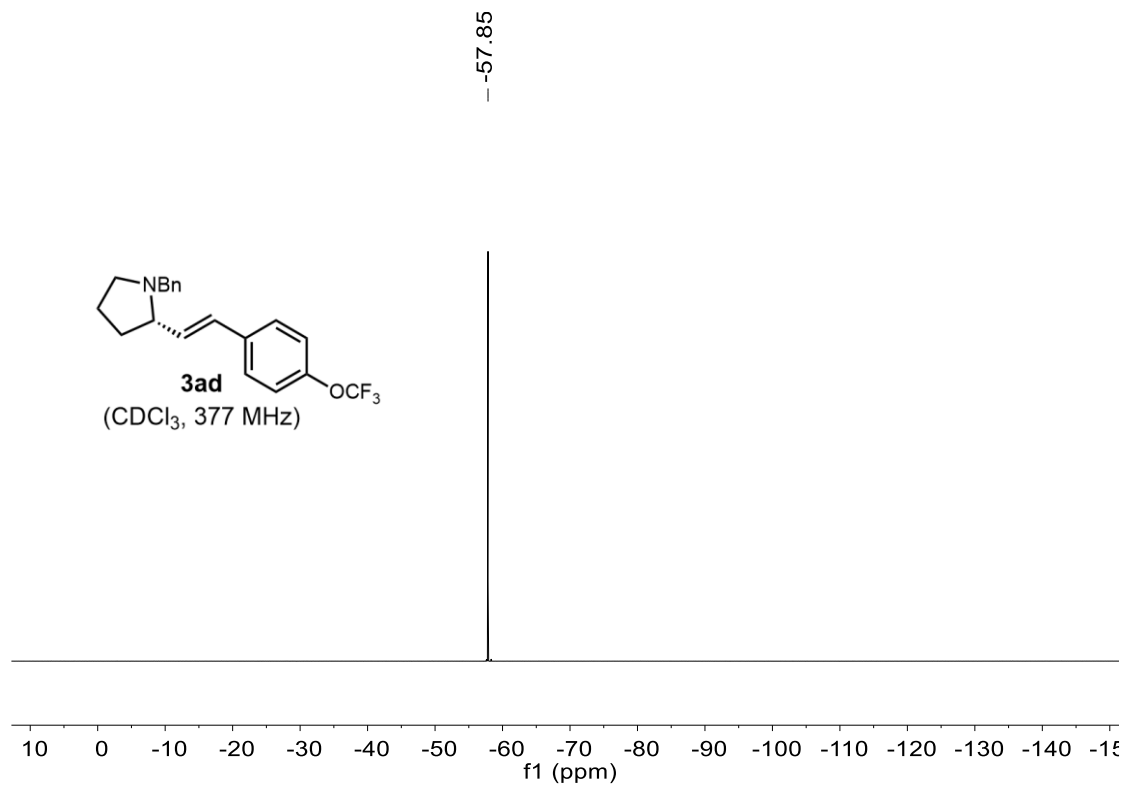

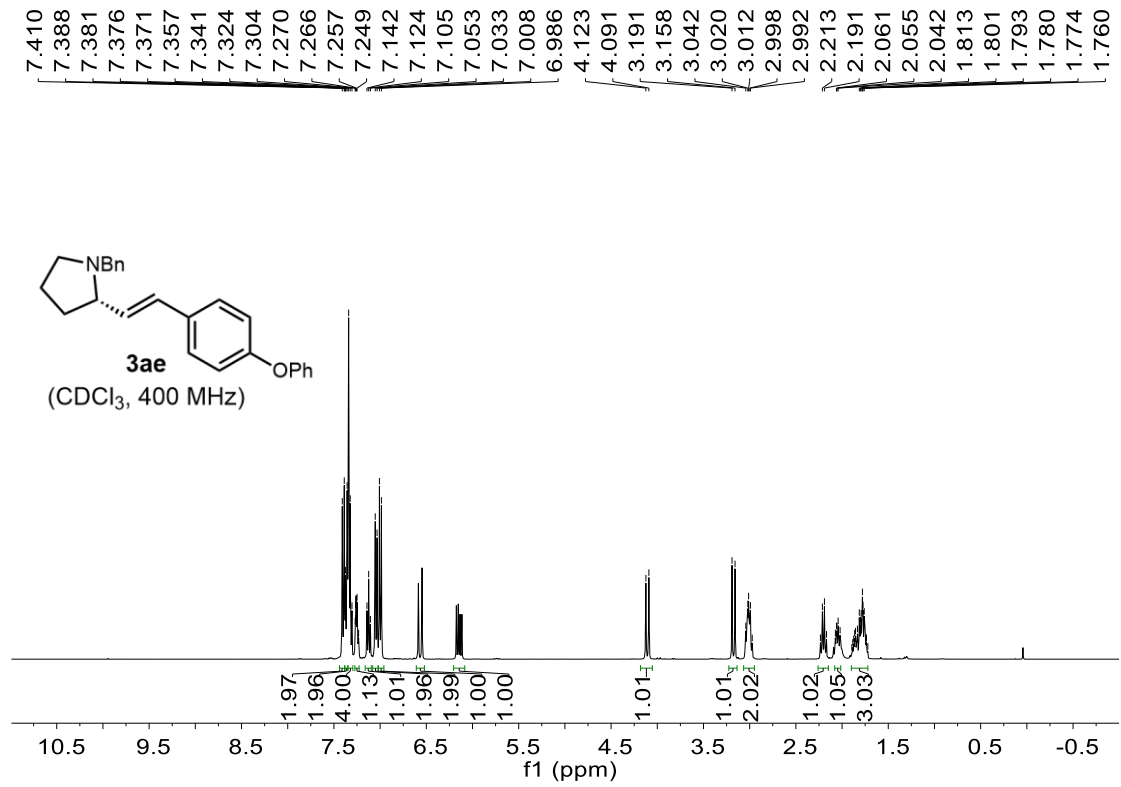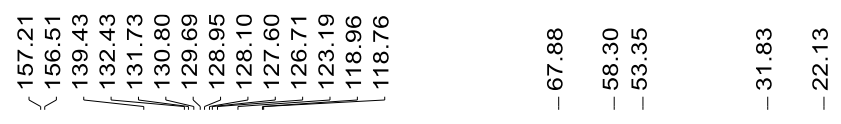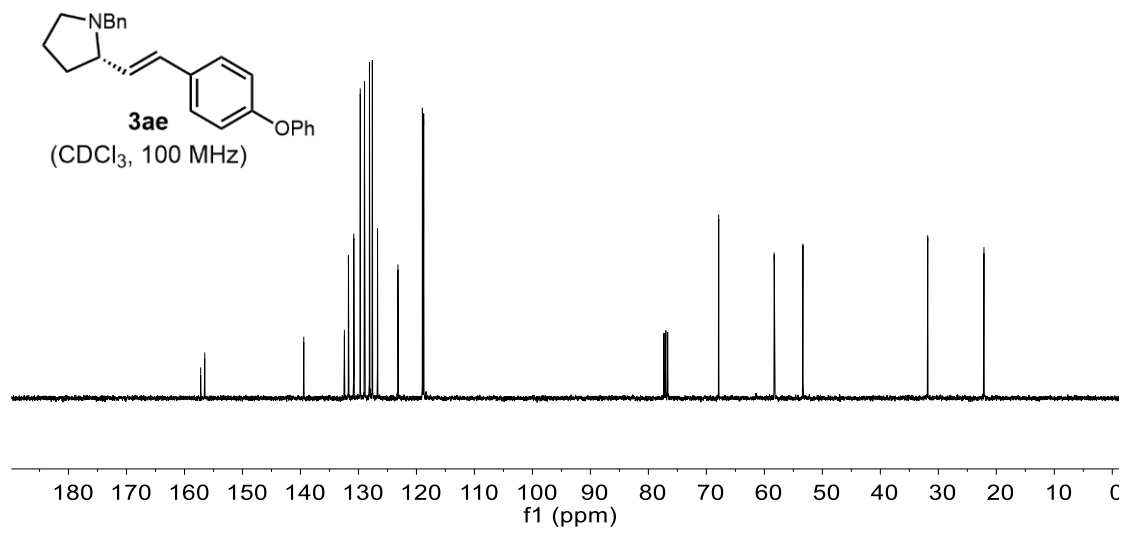

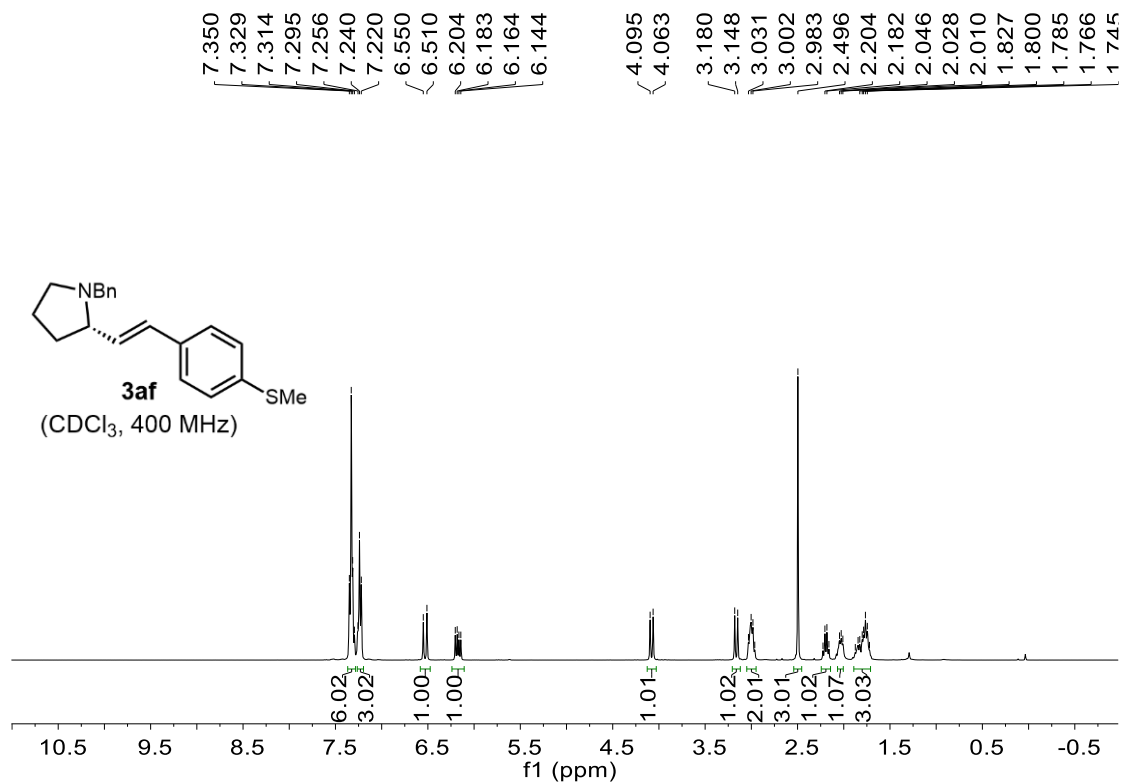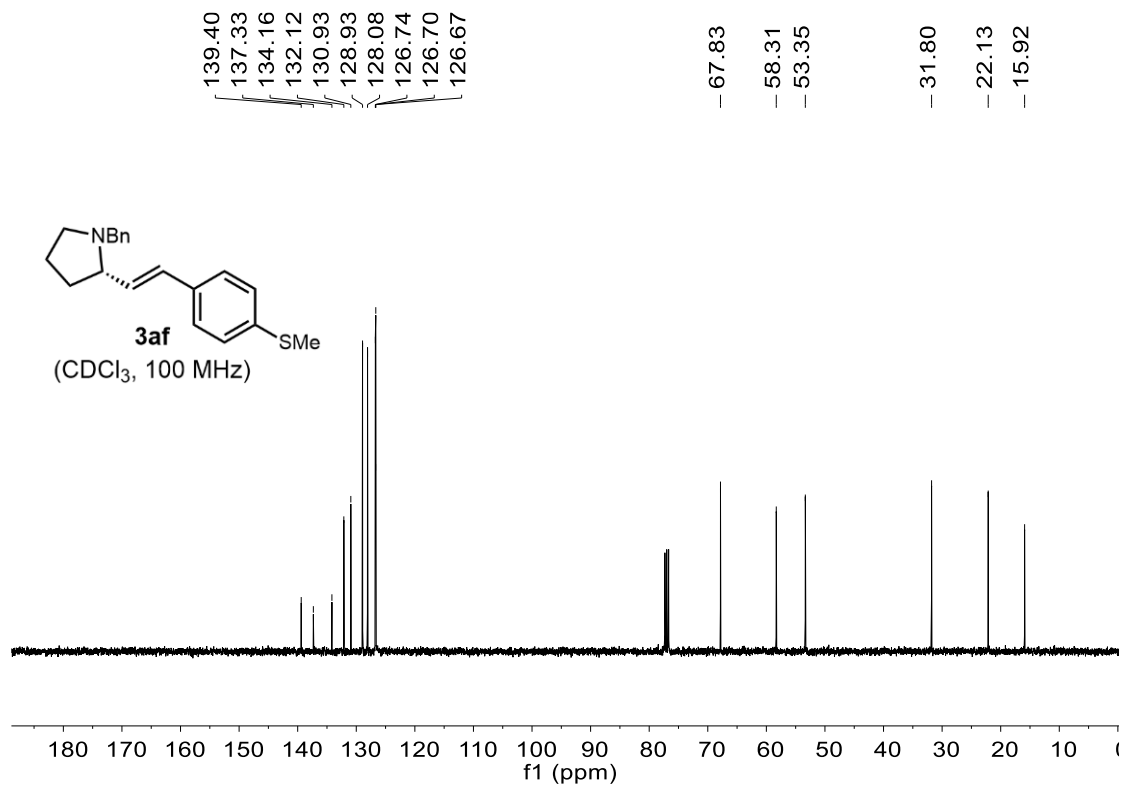



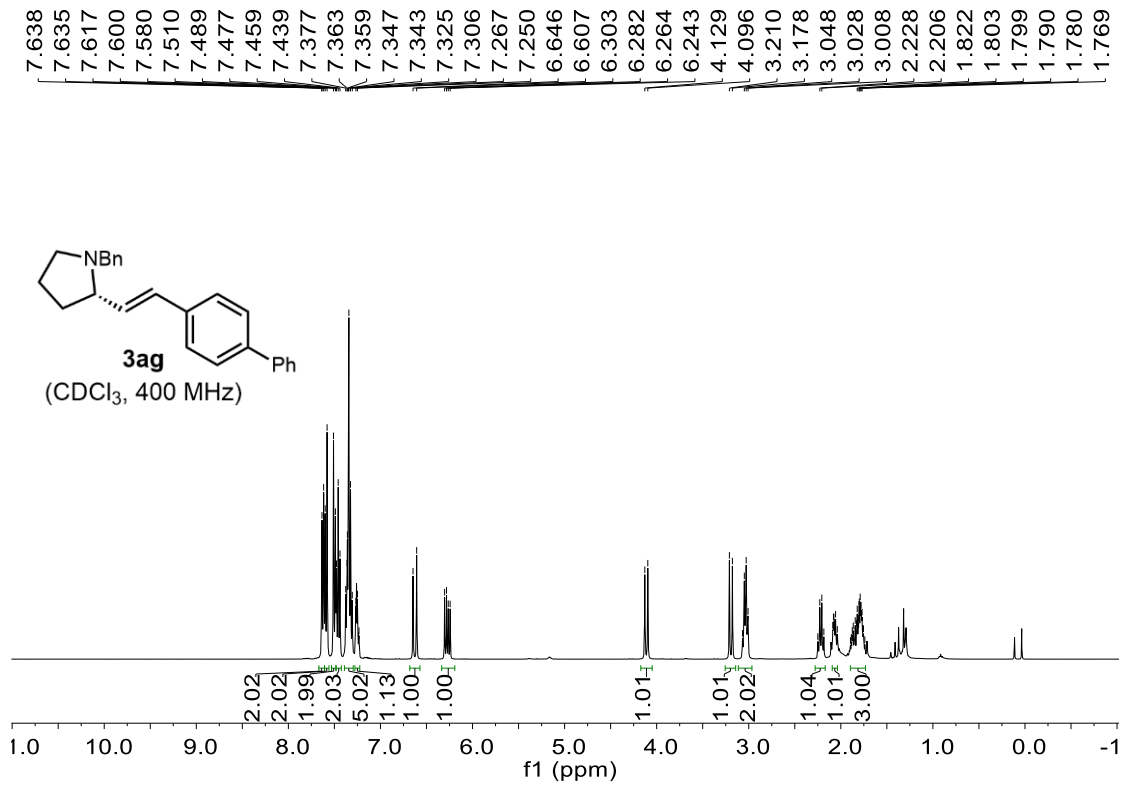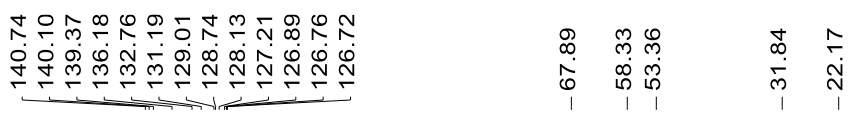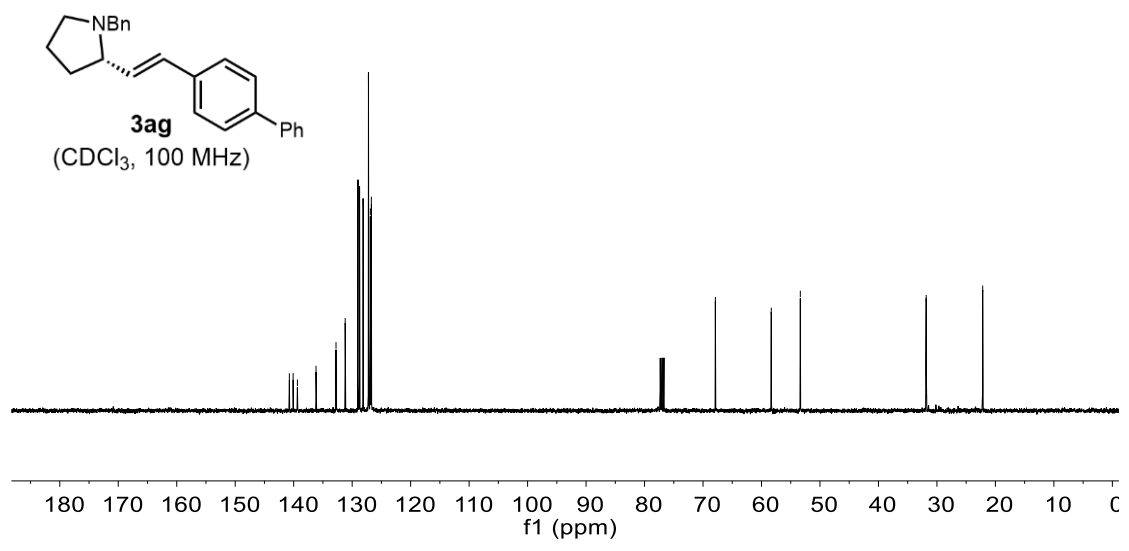

7.539  
7.520  
7.380  
7.361  
7.348  
7.345  
7.330  
7.327  
7.310  
7.271  
7.254  
7.237  
7.219  
7.218  
7.199  
6.997  
6.970  
6.953  
6.895  
6.874  
6.256  
4.157  
4.124  
4.119  
4.101  
4.083  
4.066  
3.214  
3.181  
3.055  
3.036  
3.022  
2.224  
2.203  
1.815  
1.792  
1.771  
1.507  
1.490  
1.472

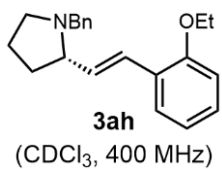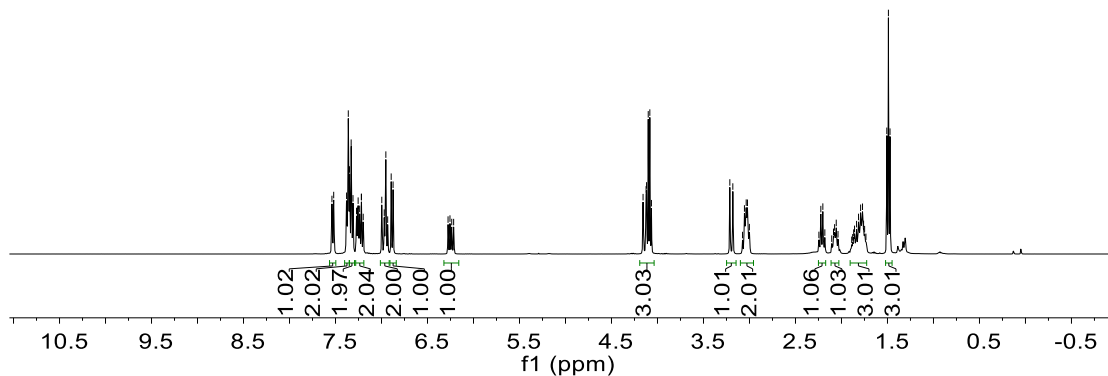

- 155.87  
 139.46  
 132.73  
 129.06  
 128.25  
 128.04  
 126.63  
 126.42  
 126.22  
 120.51  
 111.99  
 - 68.14  
 - 63.82  
 - 58.14  
 - 53.23  
 - 31.81  
 - 22.08  
 - 14.90

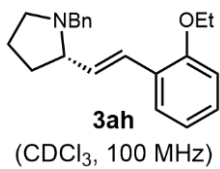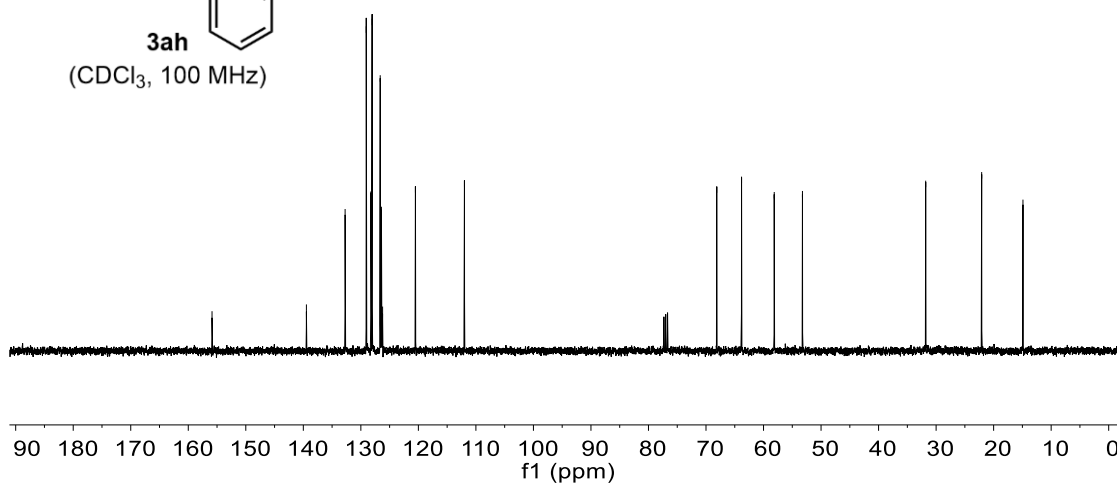

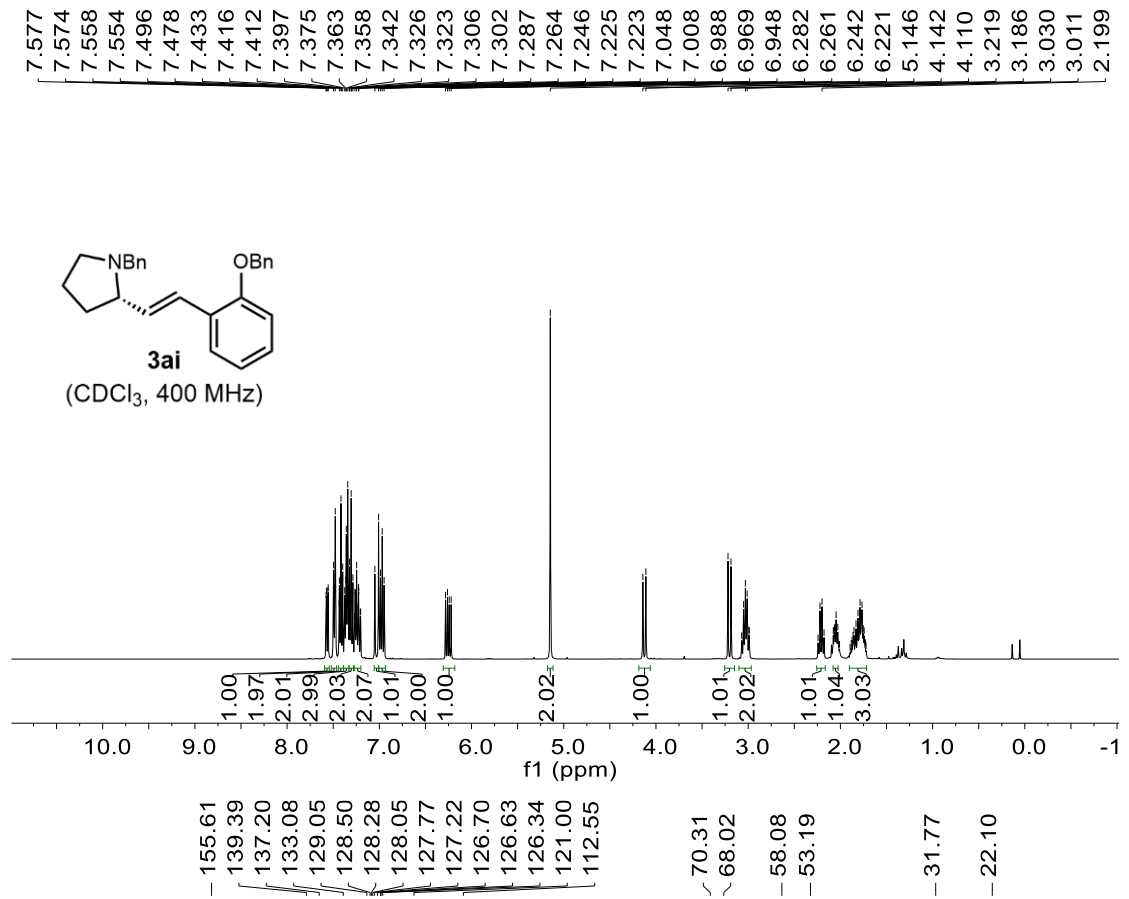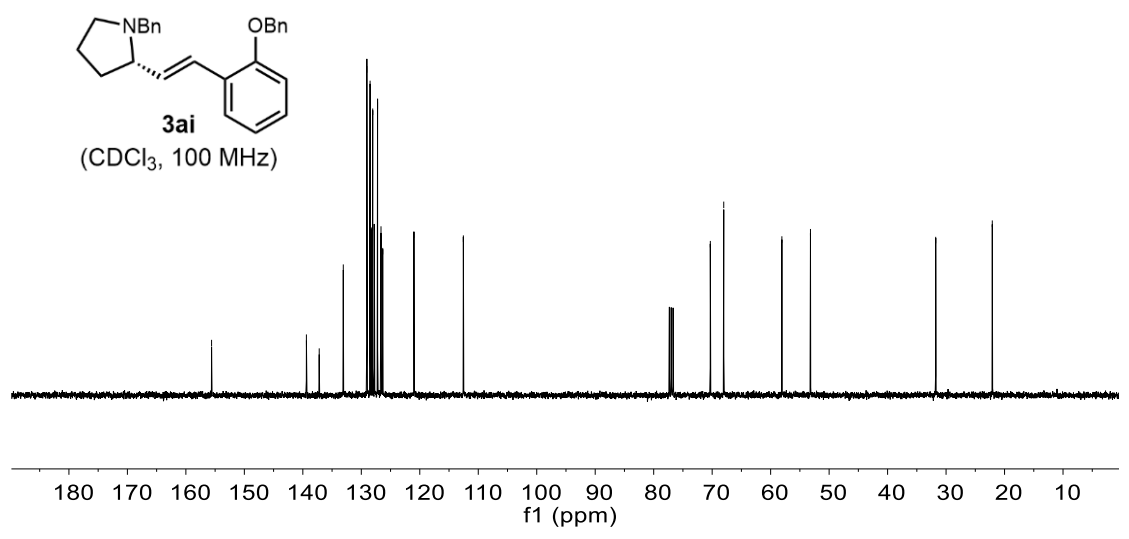

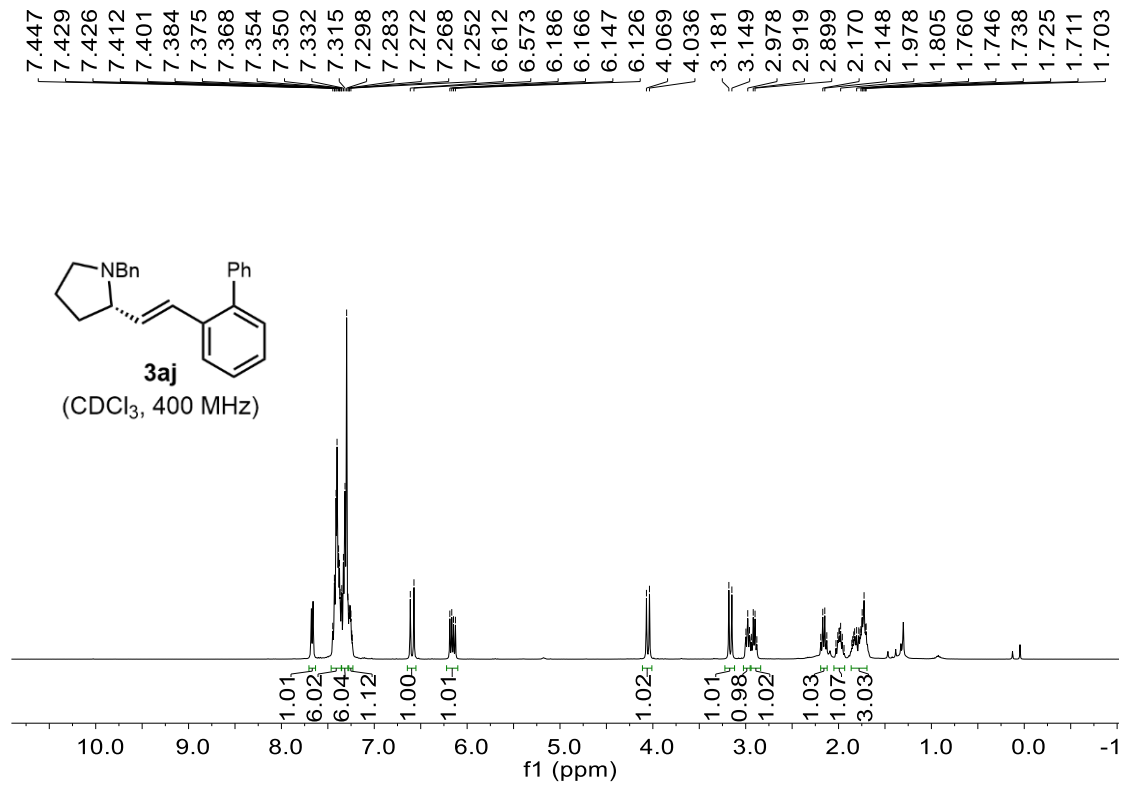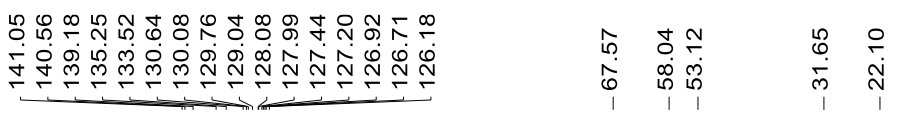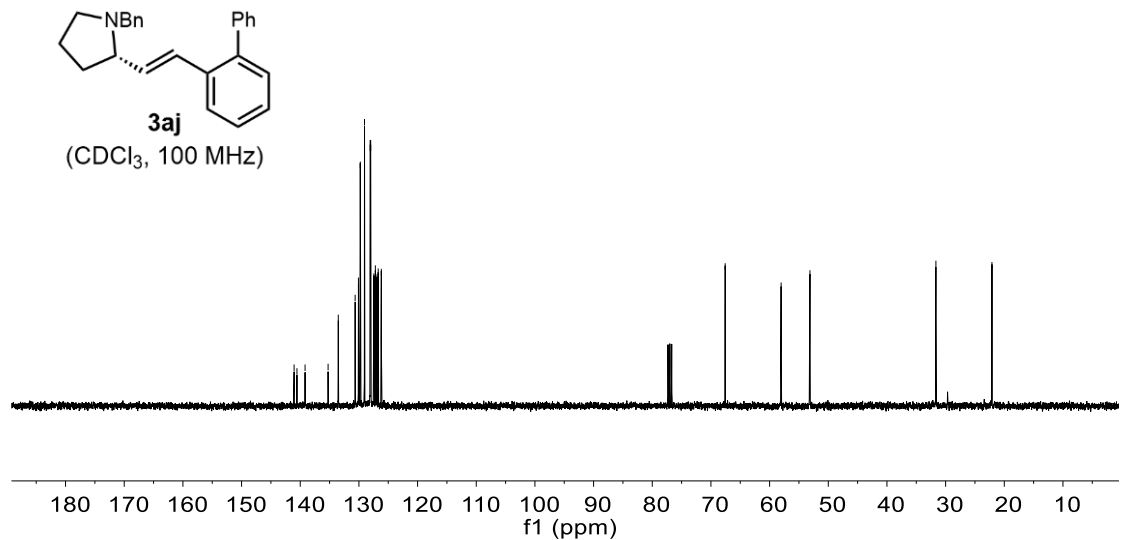

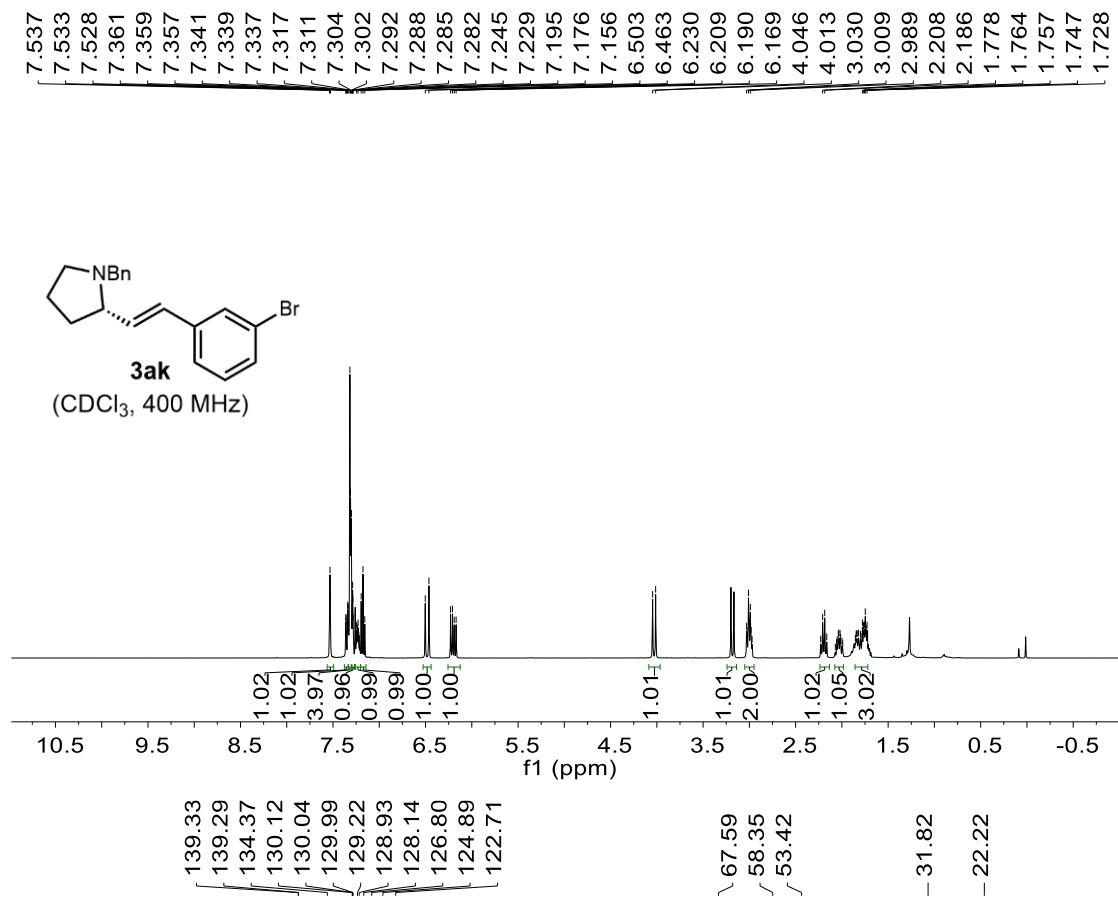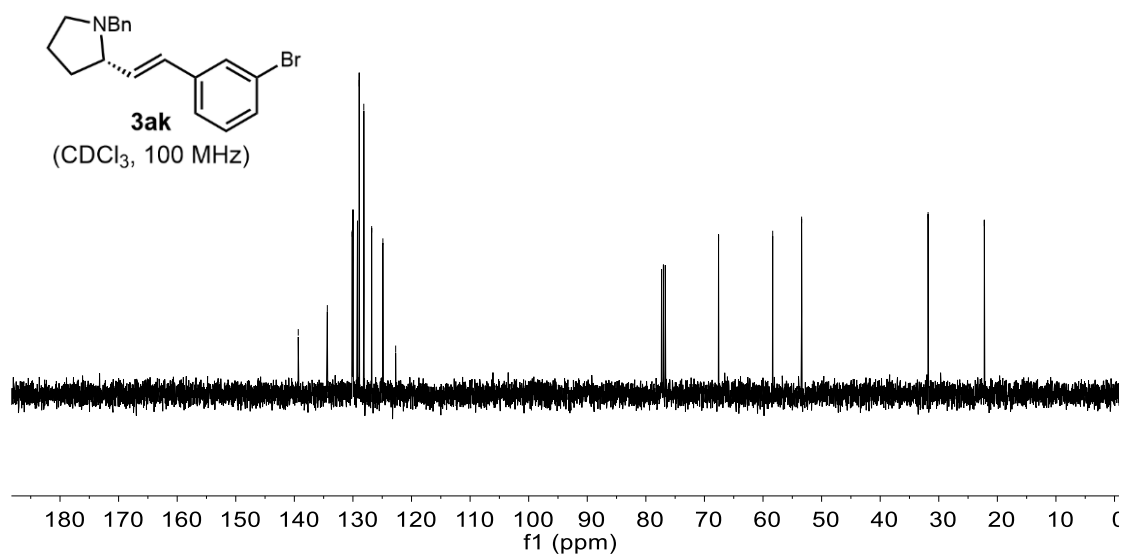

7.318  
7.313  
7.303  
7.301  
7.296  
7.282  
7.245  
7.240  
7.229  
7.221  
7.014  
6.994  
6.964  
6.959  
6.954  
6.811  
6.805  
6.791  
6.785  
6.564  
6.525  
6.236  
6.215  
6.197  
6.176  
4.092  
4.059  
3.823  
3.173  
3.140  
3.019  
2.999  
2.979  
2.195  
2.173  
1.794  
1.775  
1.761  
1.755  
1.740

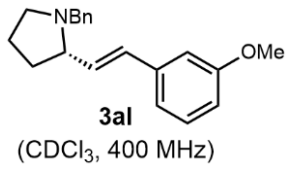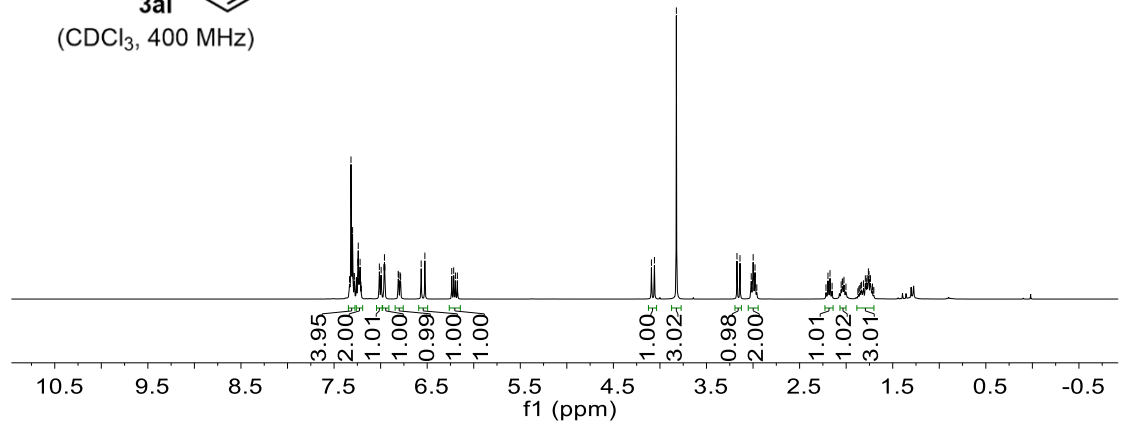

159.77  
 139.30  
 138.56  
 132.88  
 131.53  
 129.46  
 128.98  
 128.10  
 126.73  
 119.02  
 113.12  
 111.40  
 67.75  
 58.28  
 55.15  
 53.33  
 31.78  
 22.15

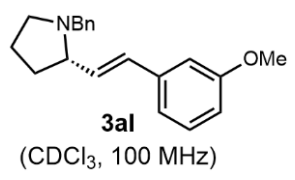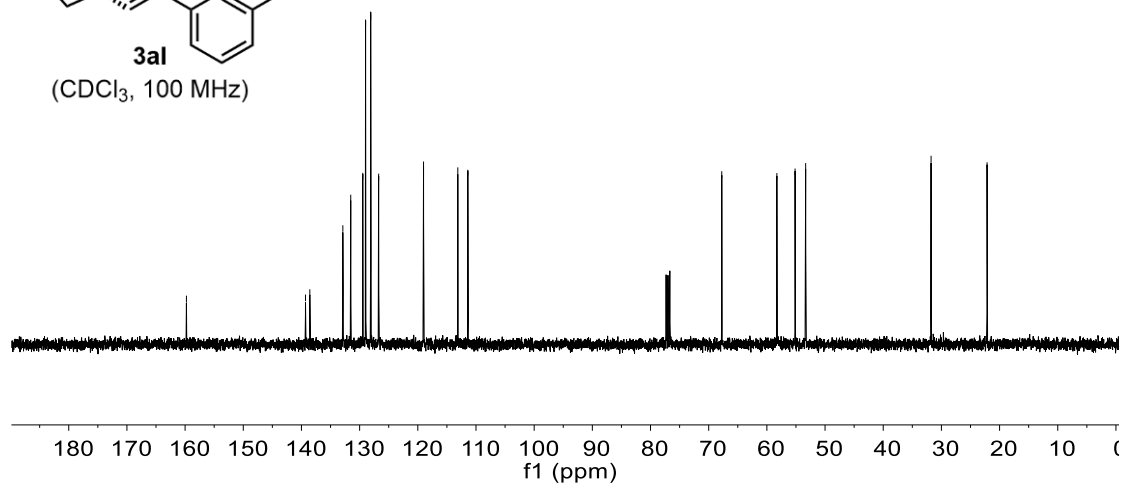

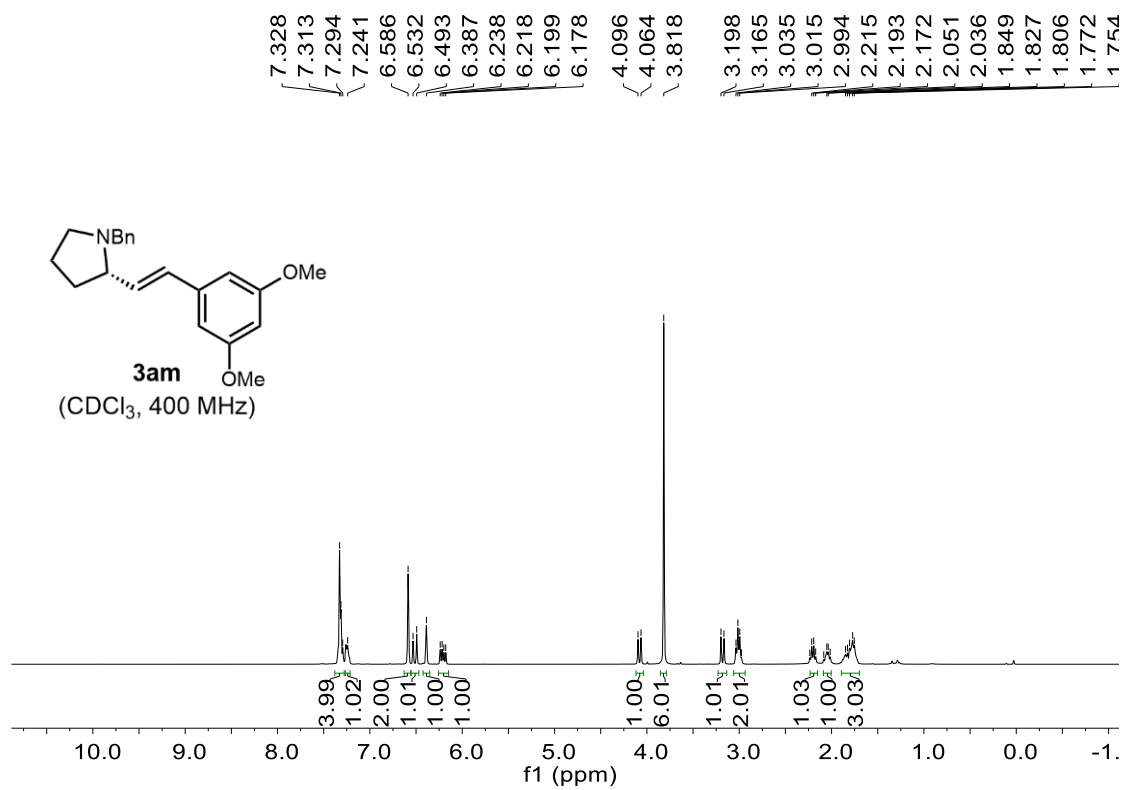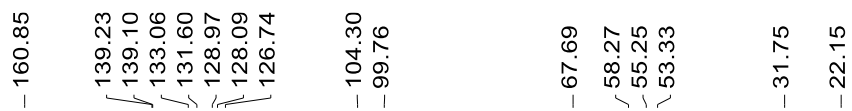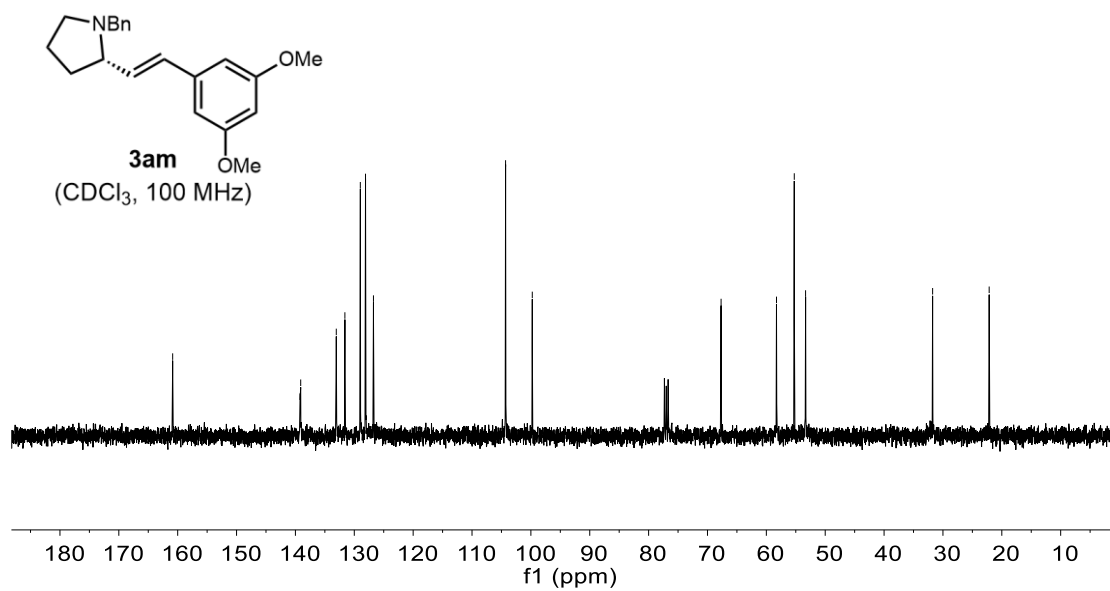

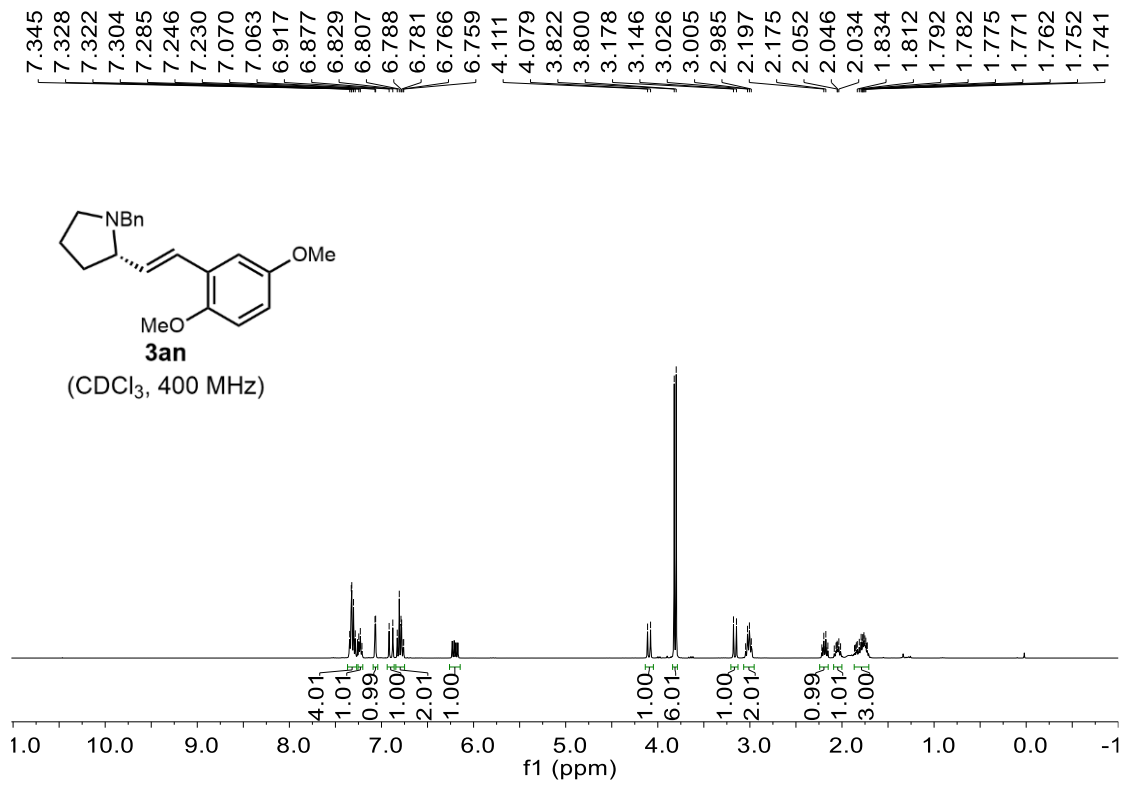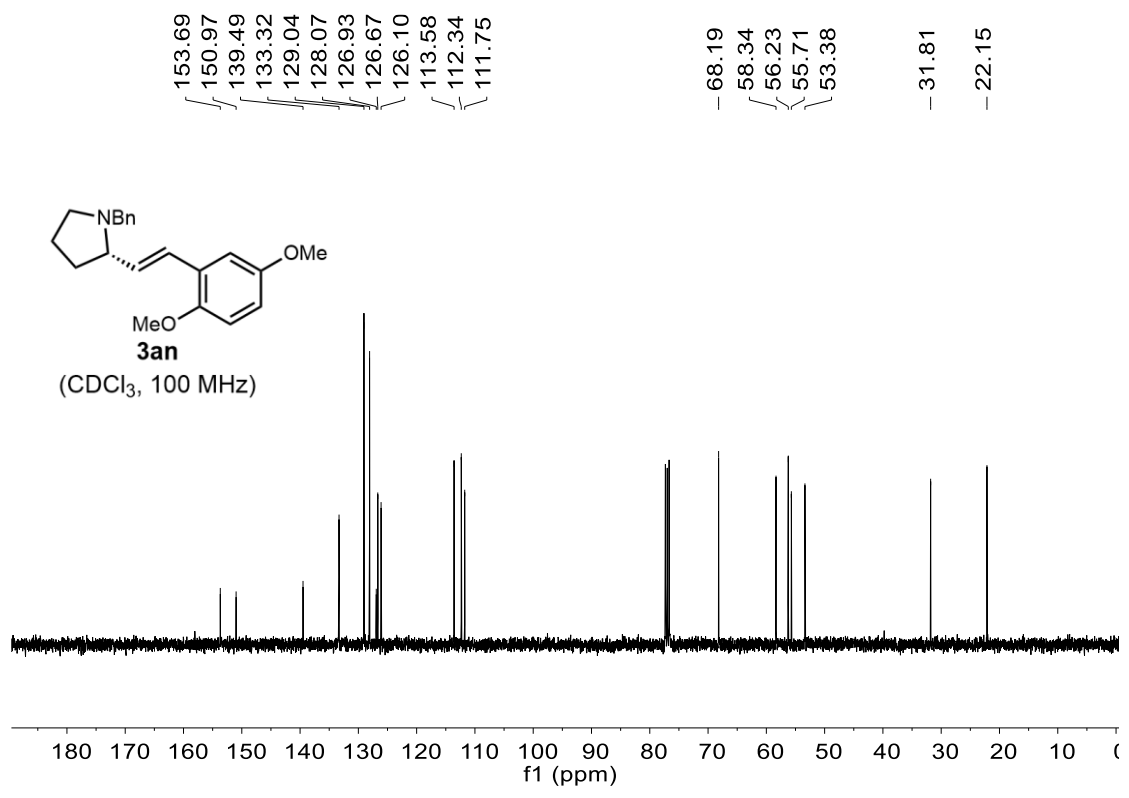



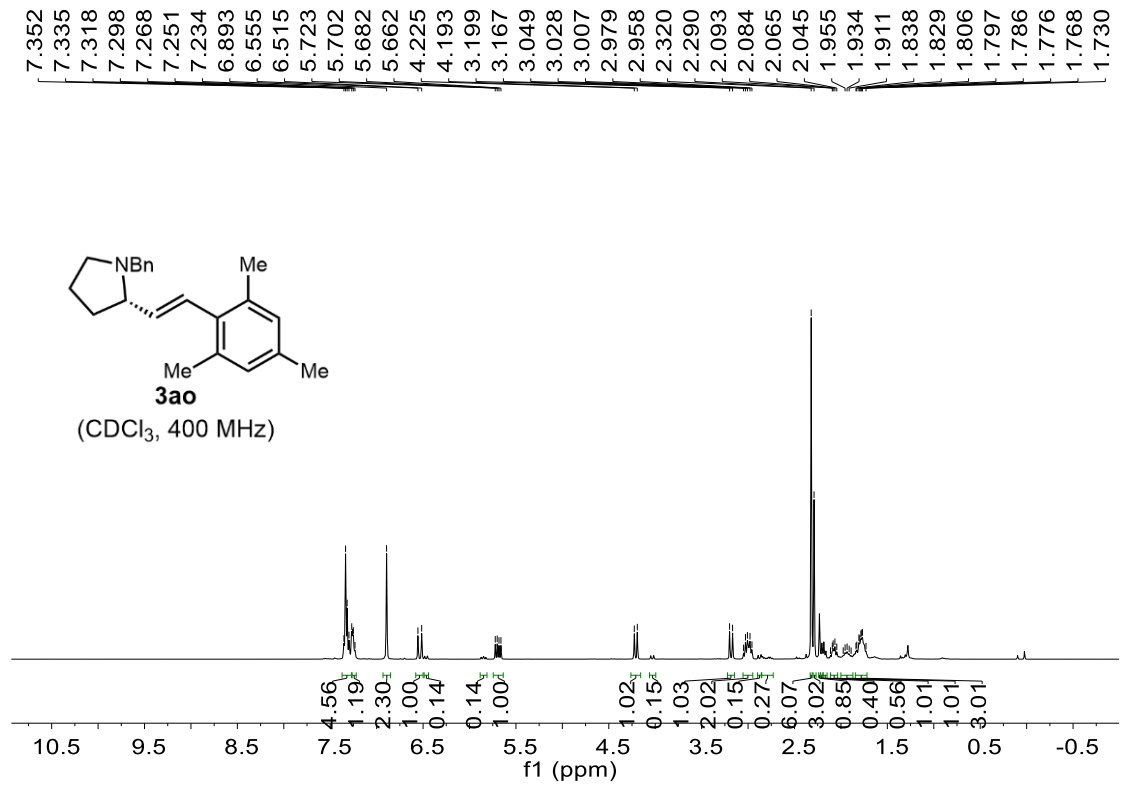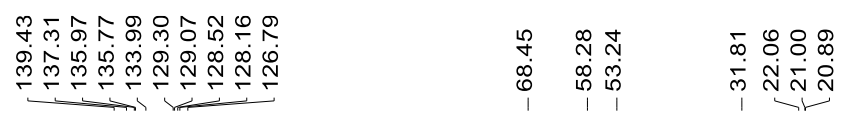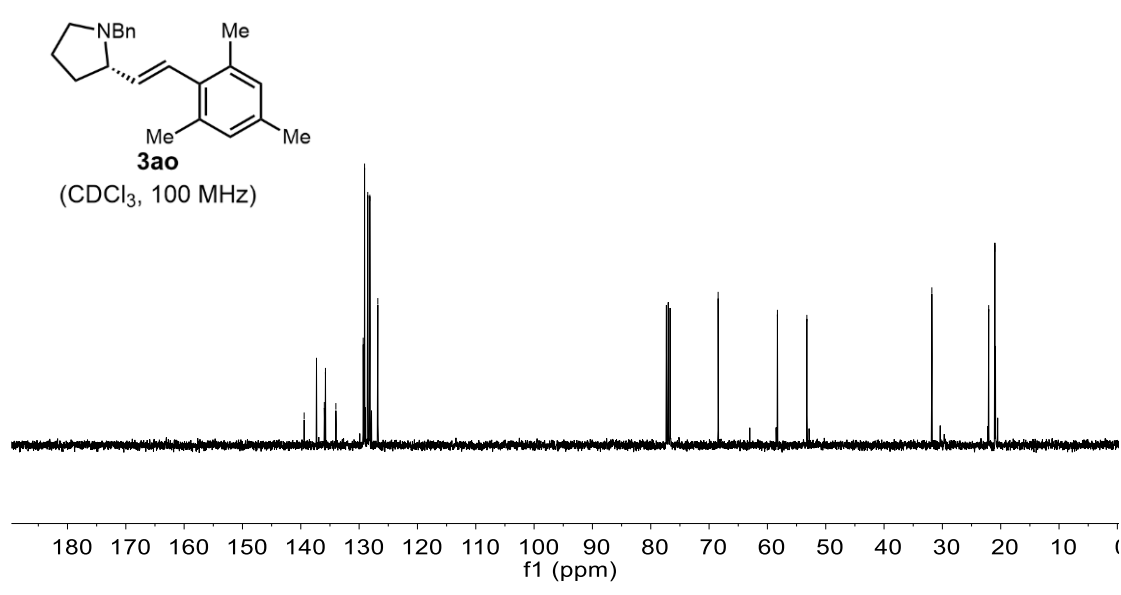

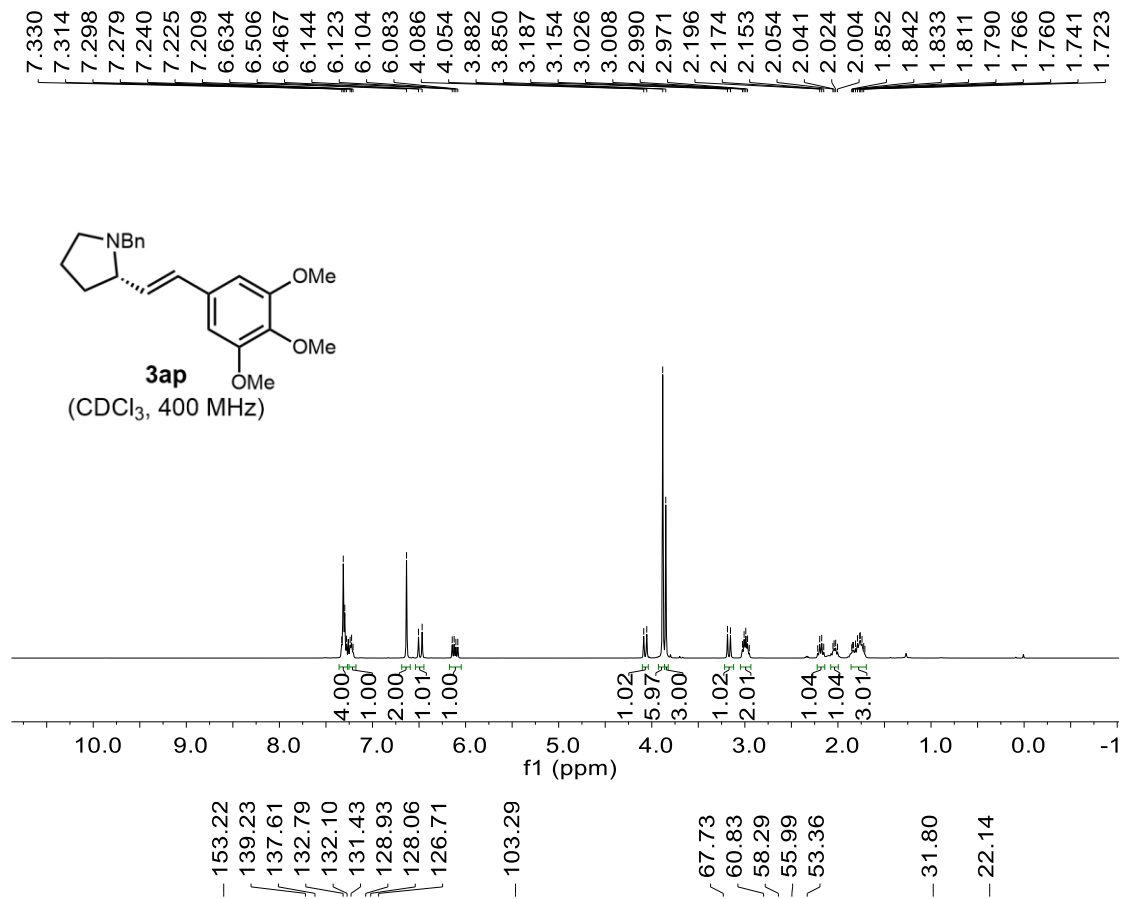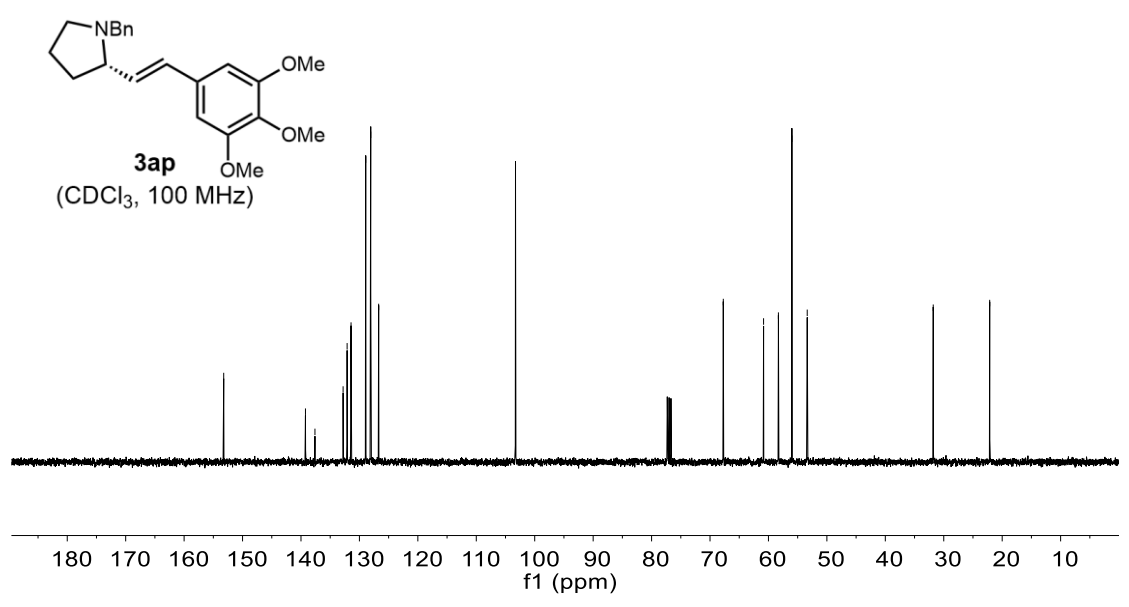

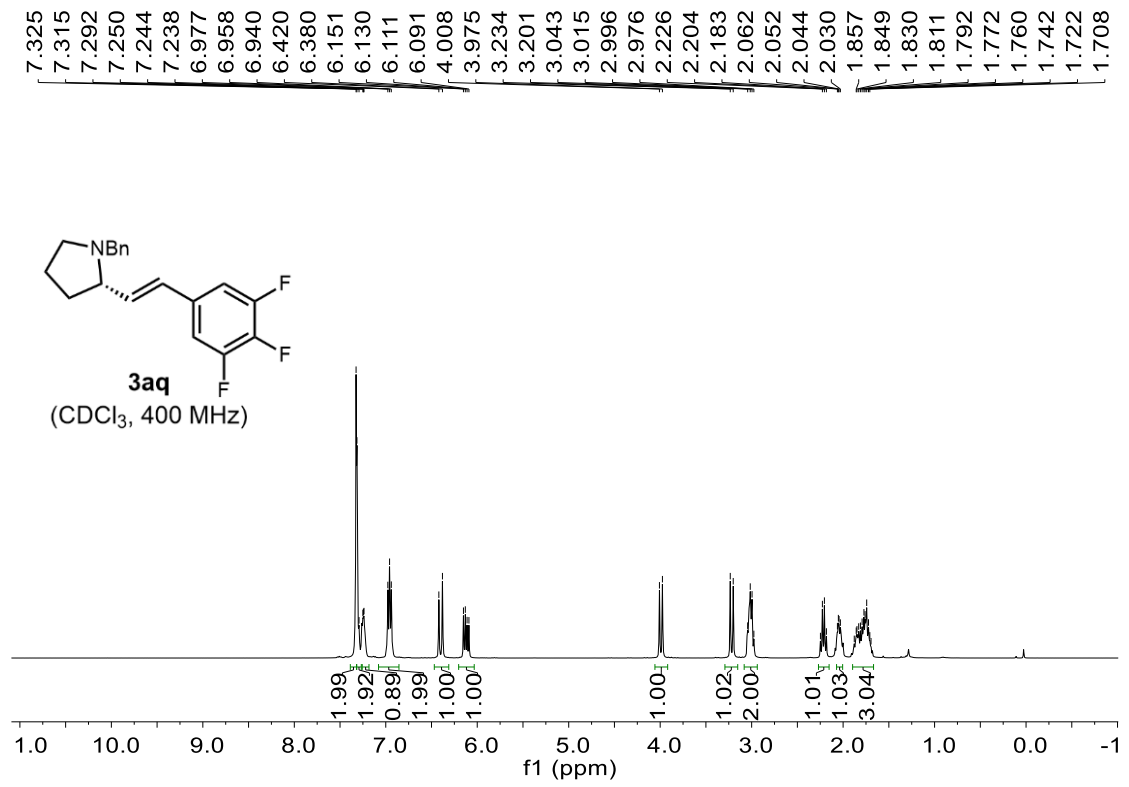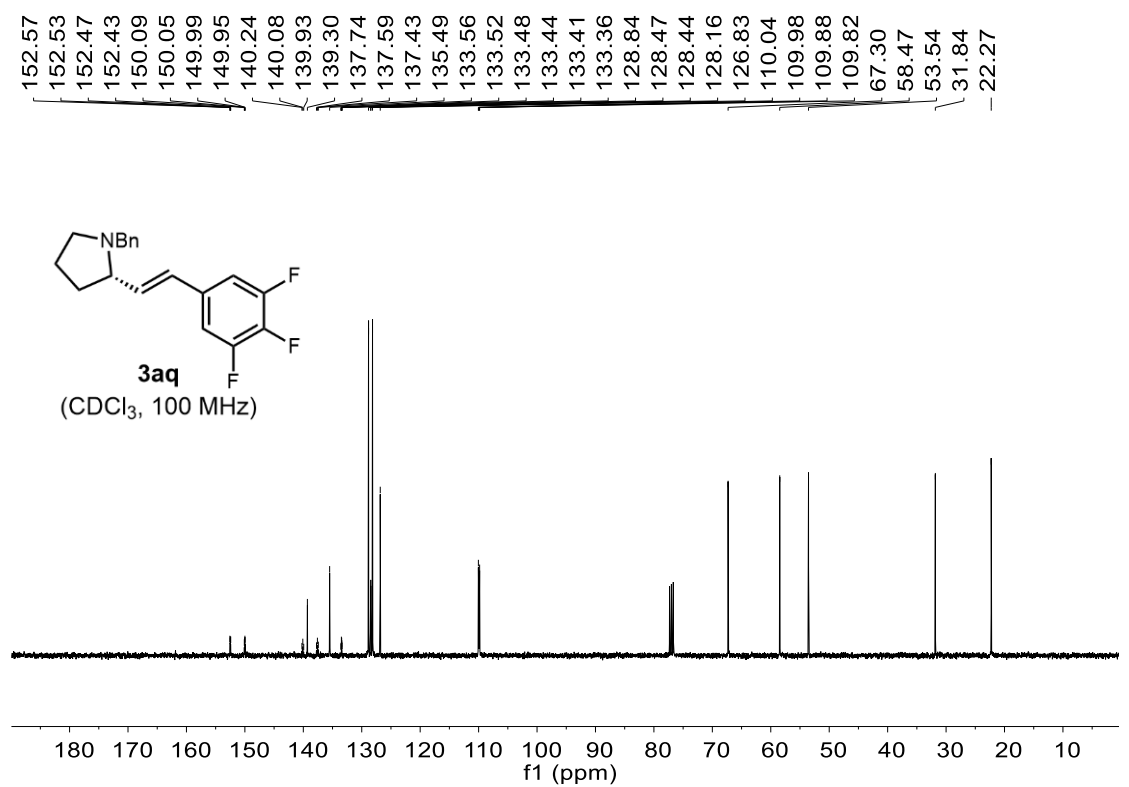

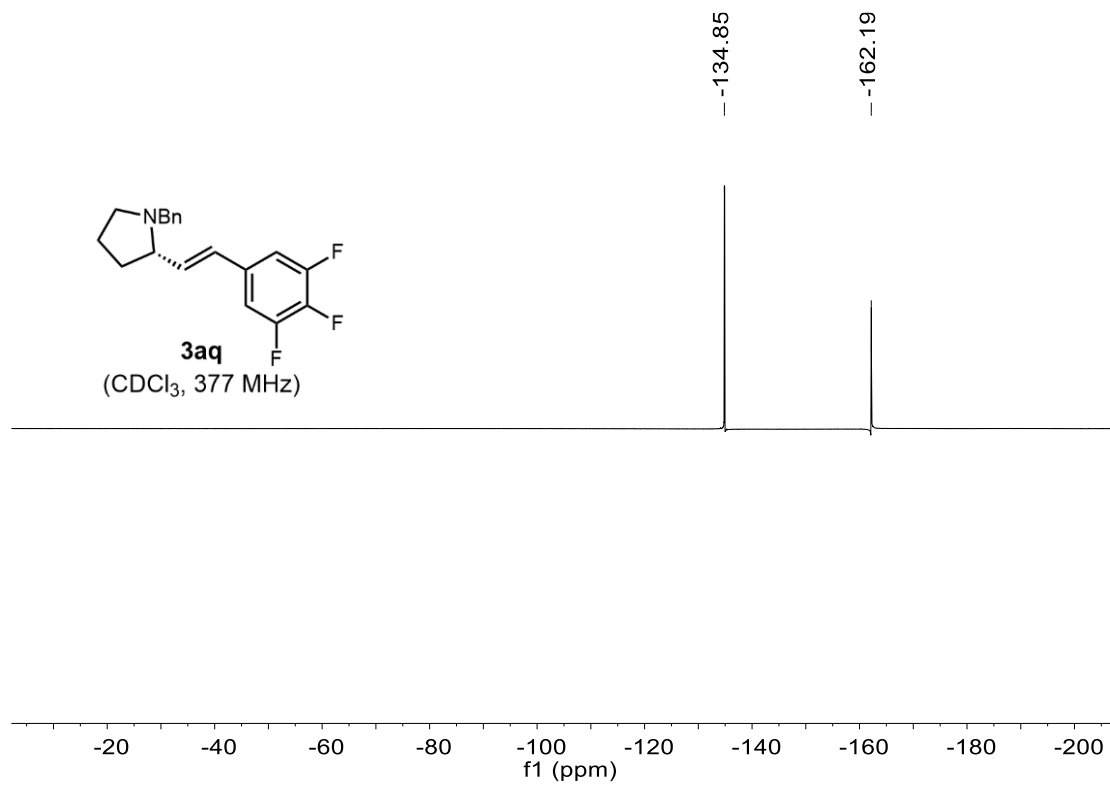

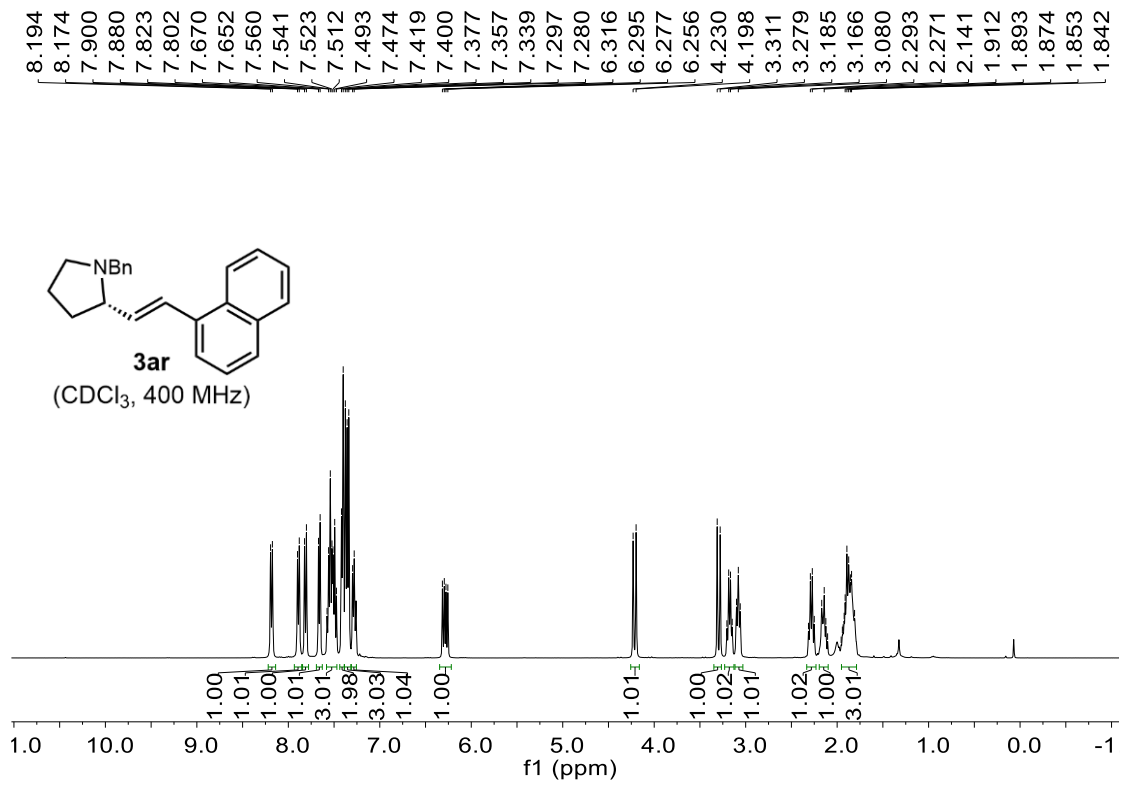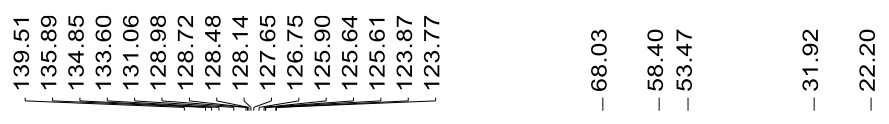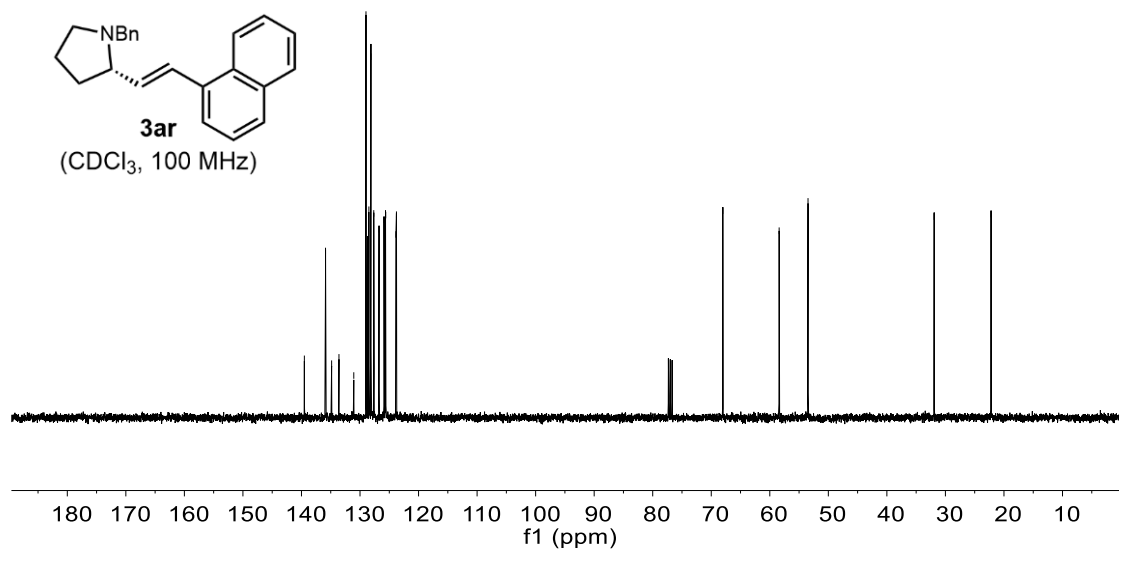

7.818  
7.810  
7.799  
7.788  
7.739  
7.655  
7.651  
7.633  
7.630  
7.471  
7.467  
7.456  
7.453  
7.437  
7.433  
7.358  
7.342  
7.331  
7.313  
7.294  
7.253  
7.236  
6.755  
6.715  
6.363  
6.343  
4.132  
4.099  
3.221  
3.188  
3.072  
3.052  
3.033  
2.209  
1.847  
1.826  
1.811  
1.805  
1.792  
1.785

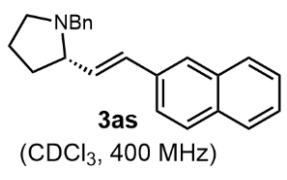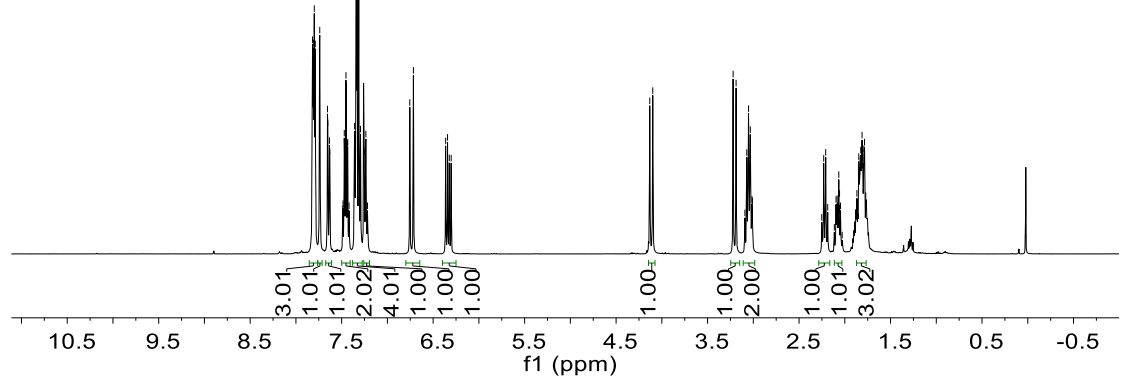

139.41  
 134.63  
 133.61  
 133.09  
 132.88  
 131.73  
 129.01  
 128.13  
 127.89  
 127.63  
 126.75  
 126.18  
 125.99  
 125.68  
 123.67  
 - 67.96  
 - 58.37  
 - 53.41  
 - 31.89  
 - 22.21

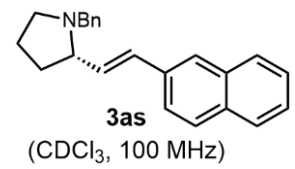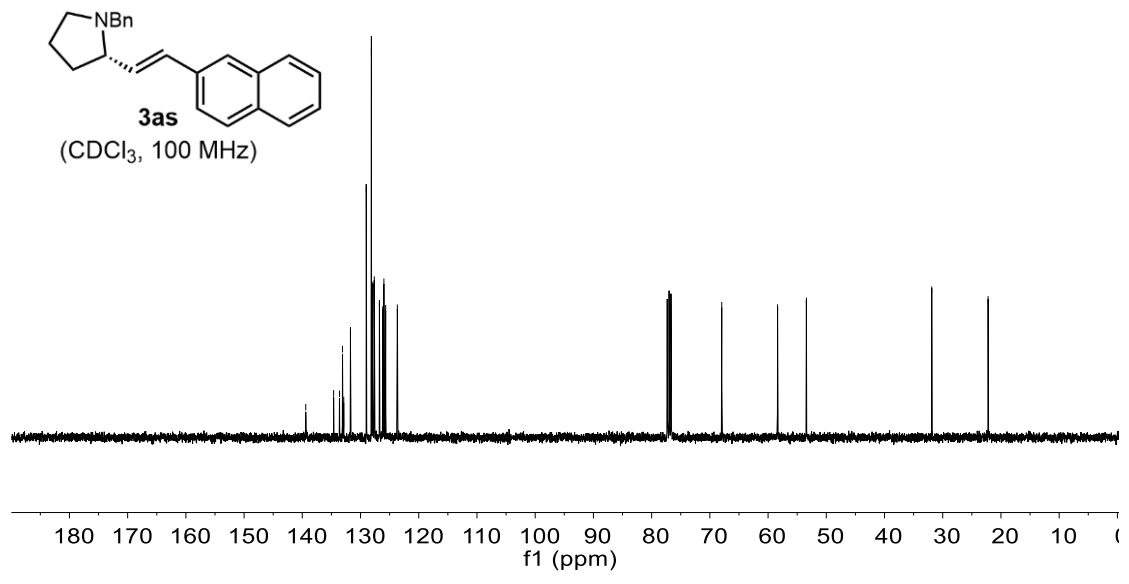

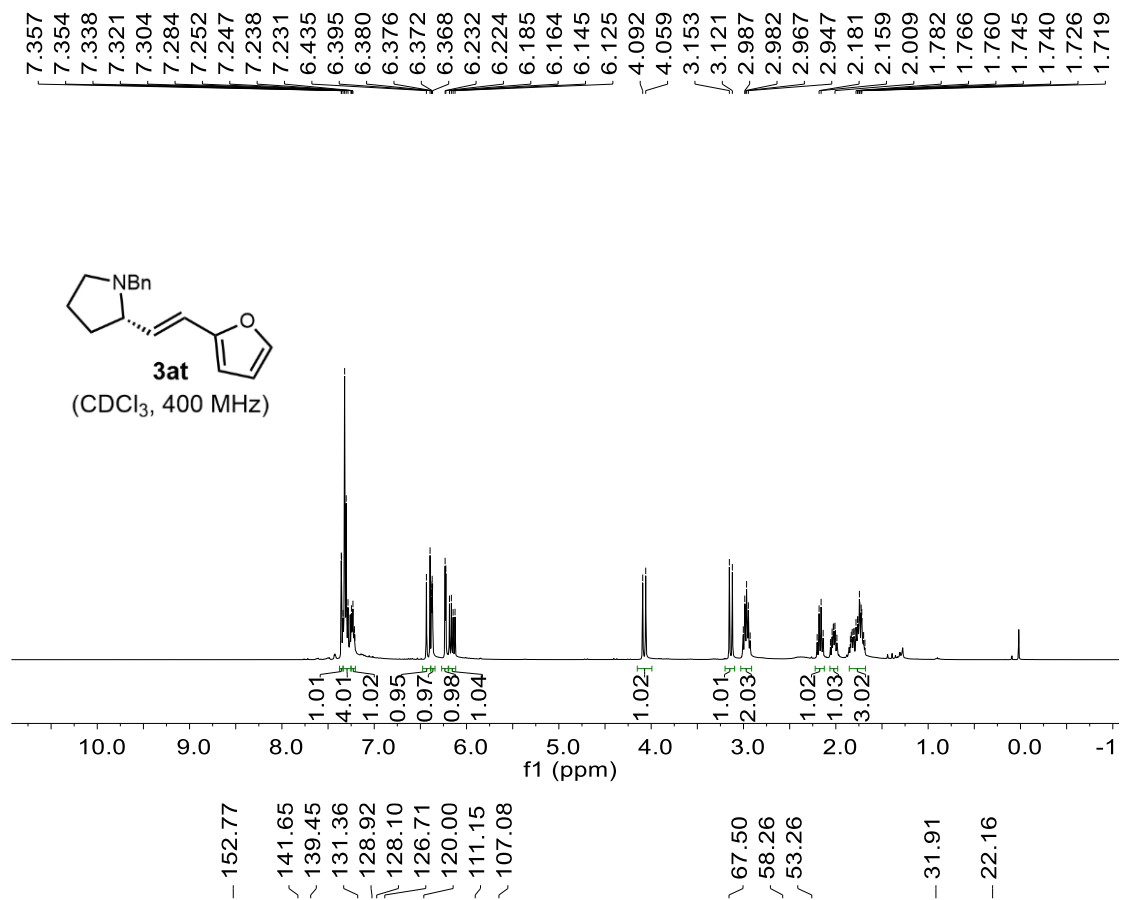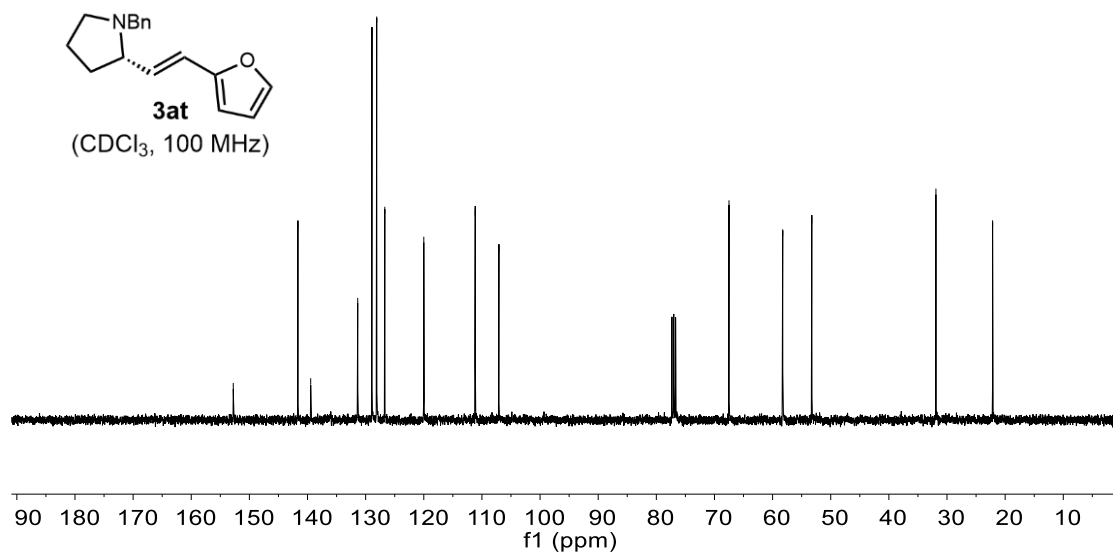

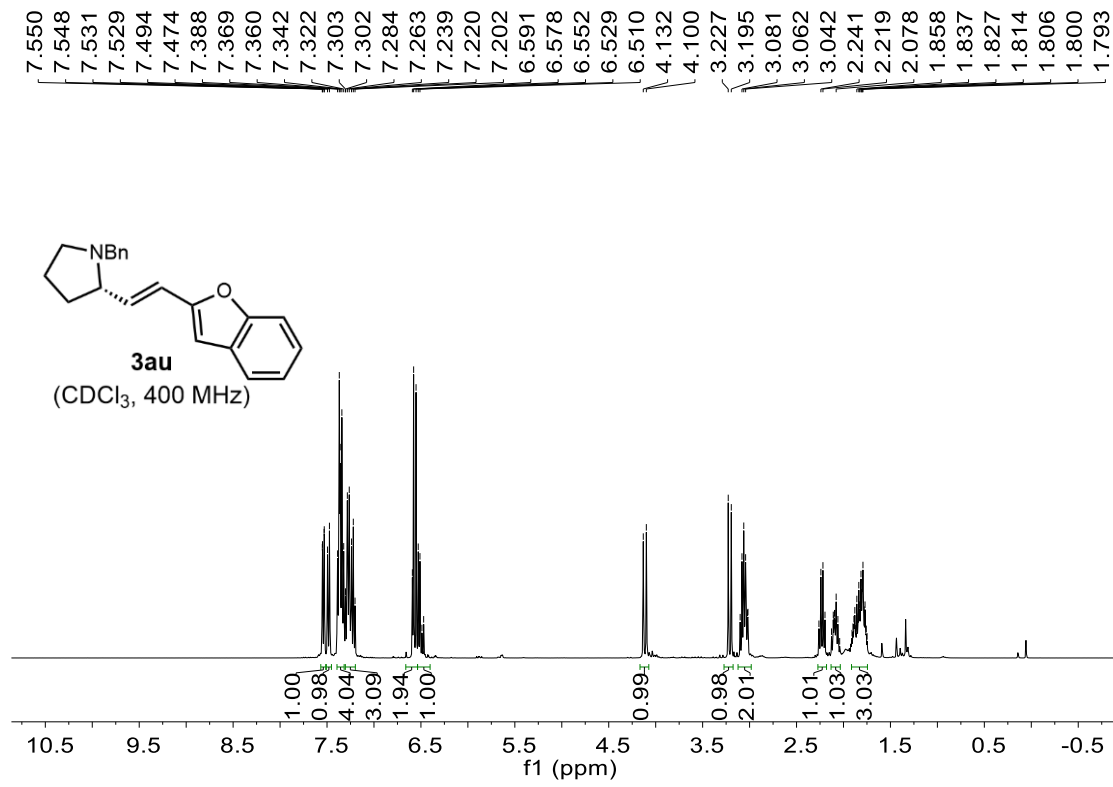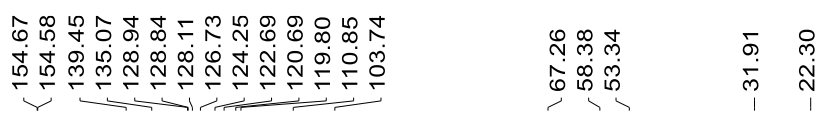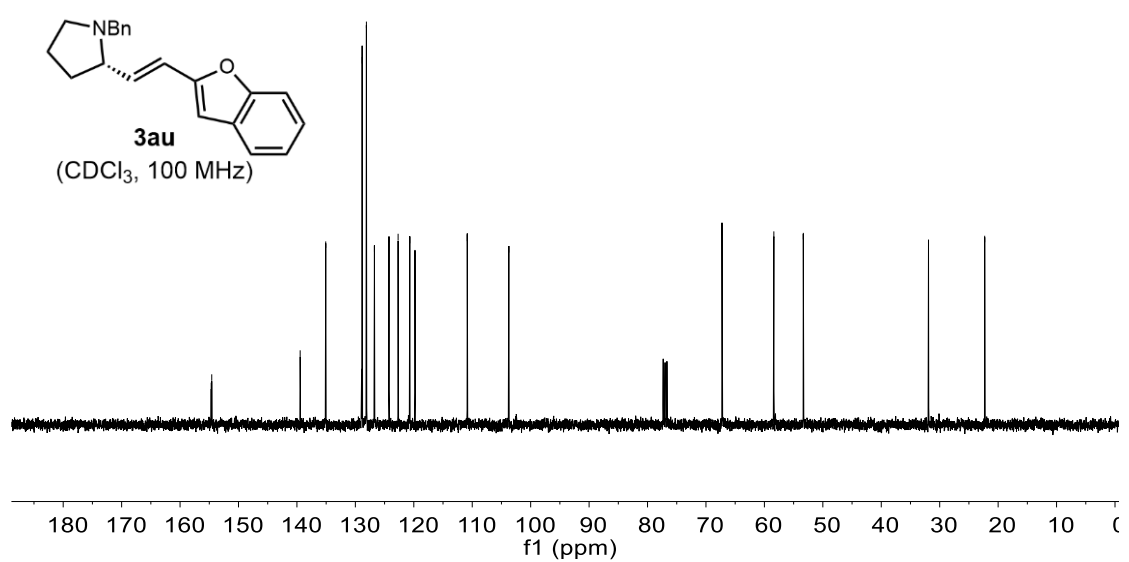



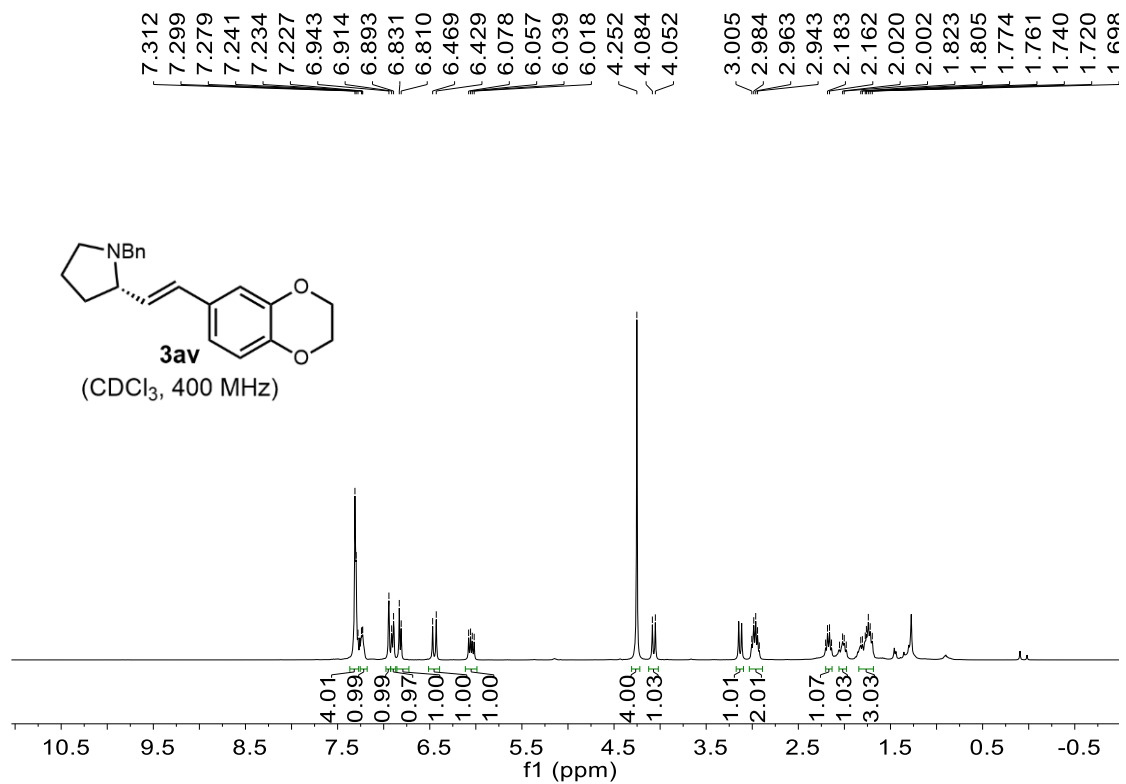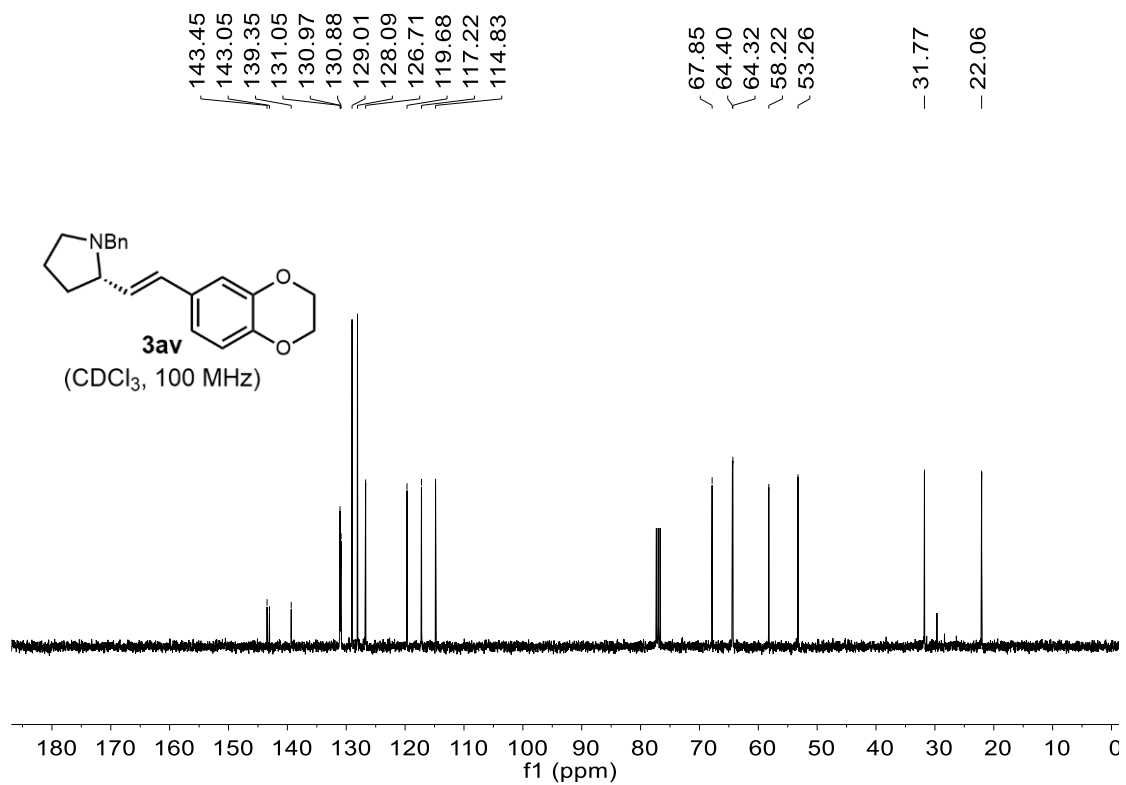

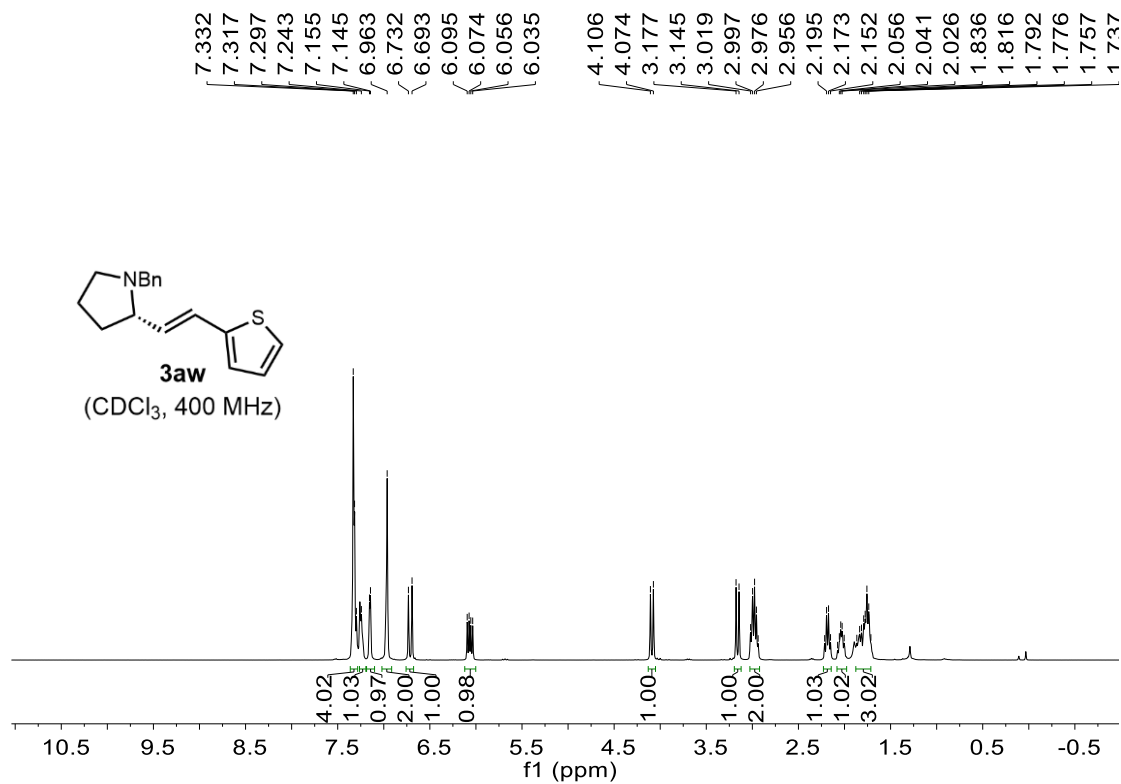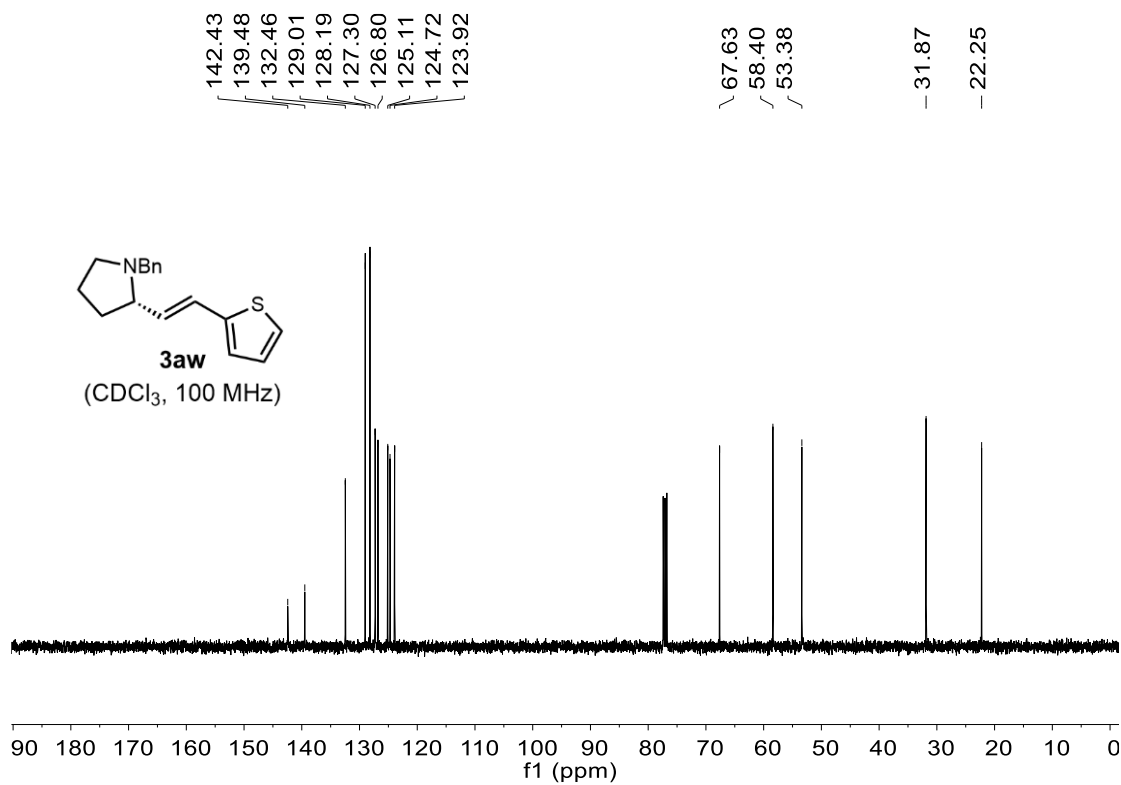

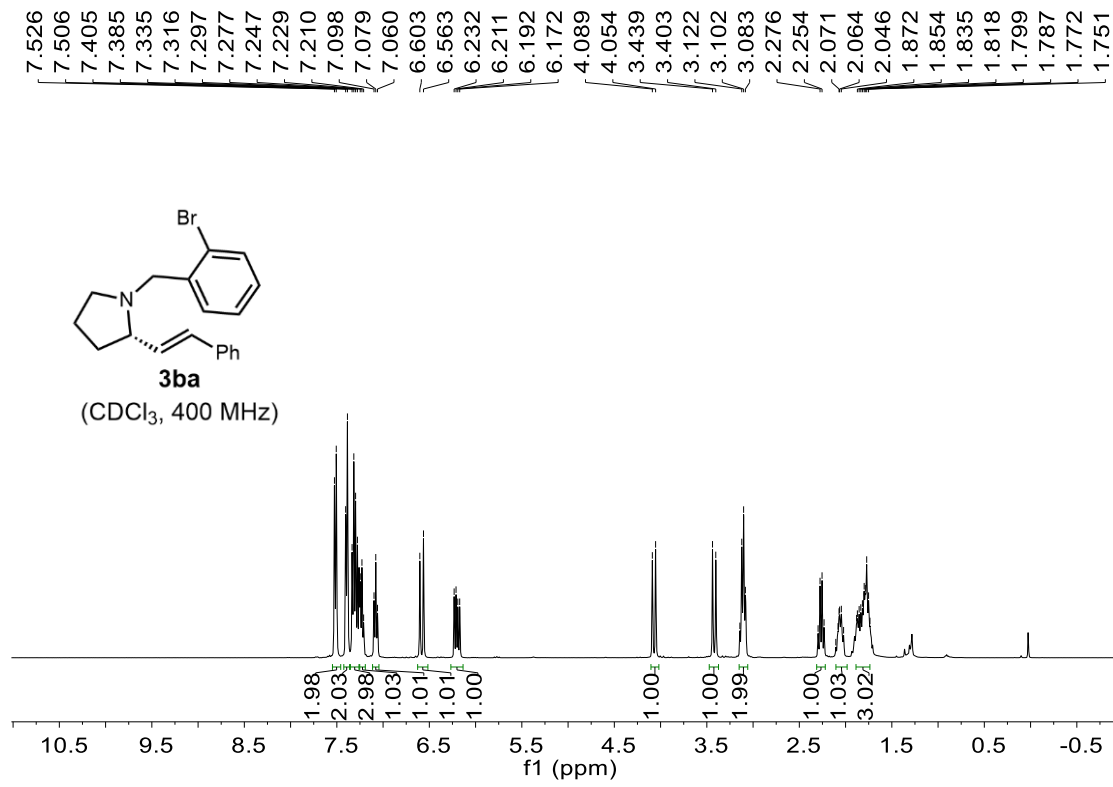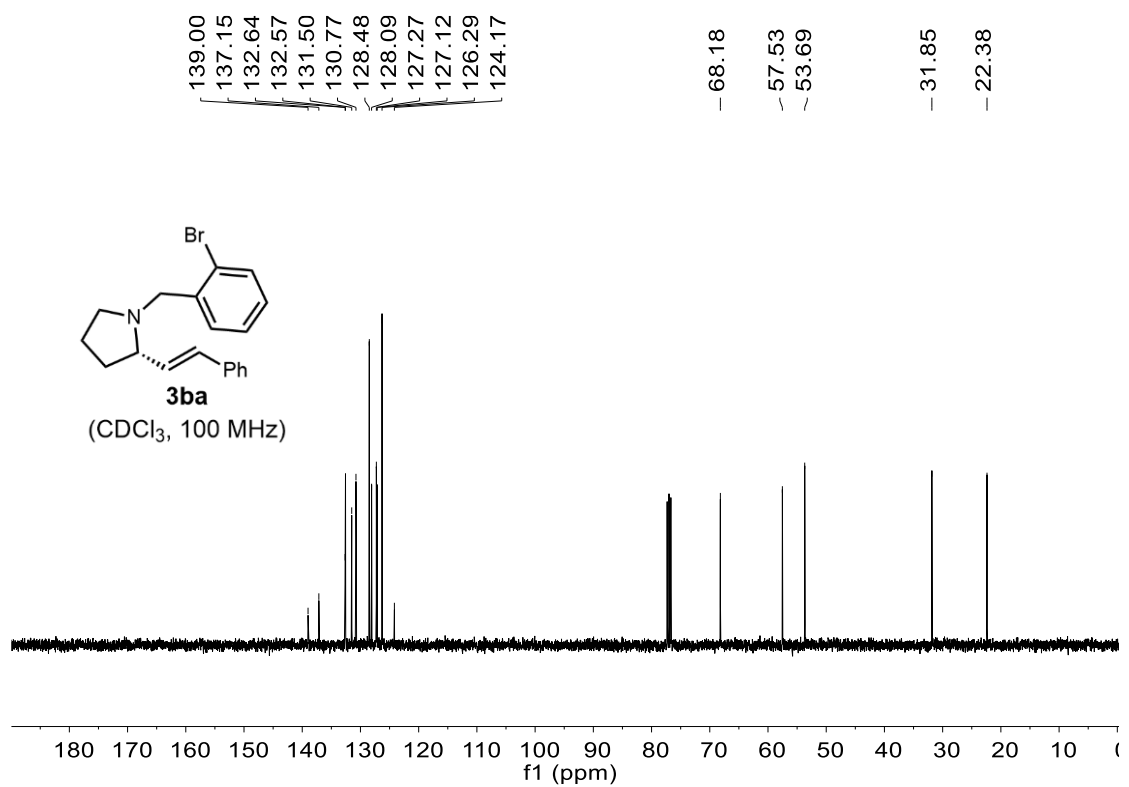



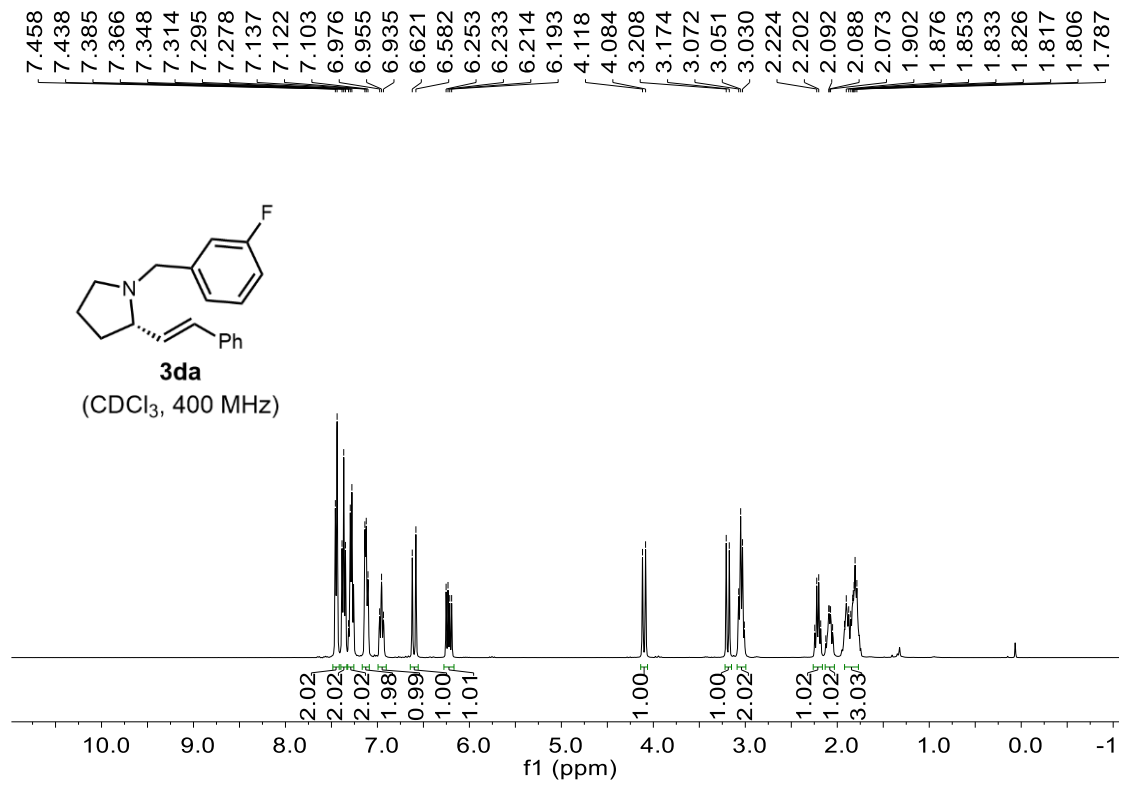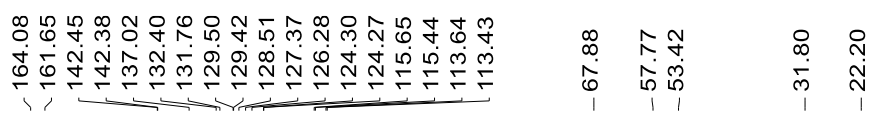

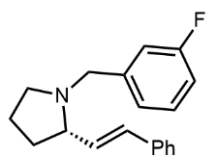

**3da**  
(CDCl<sub>3</sub>, 377 MHz)

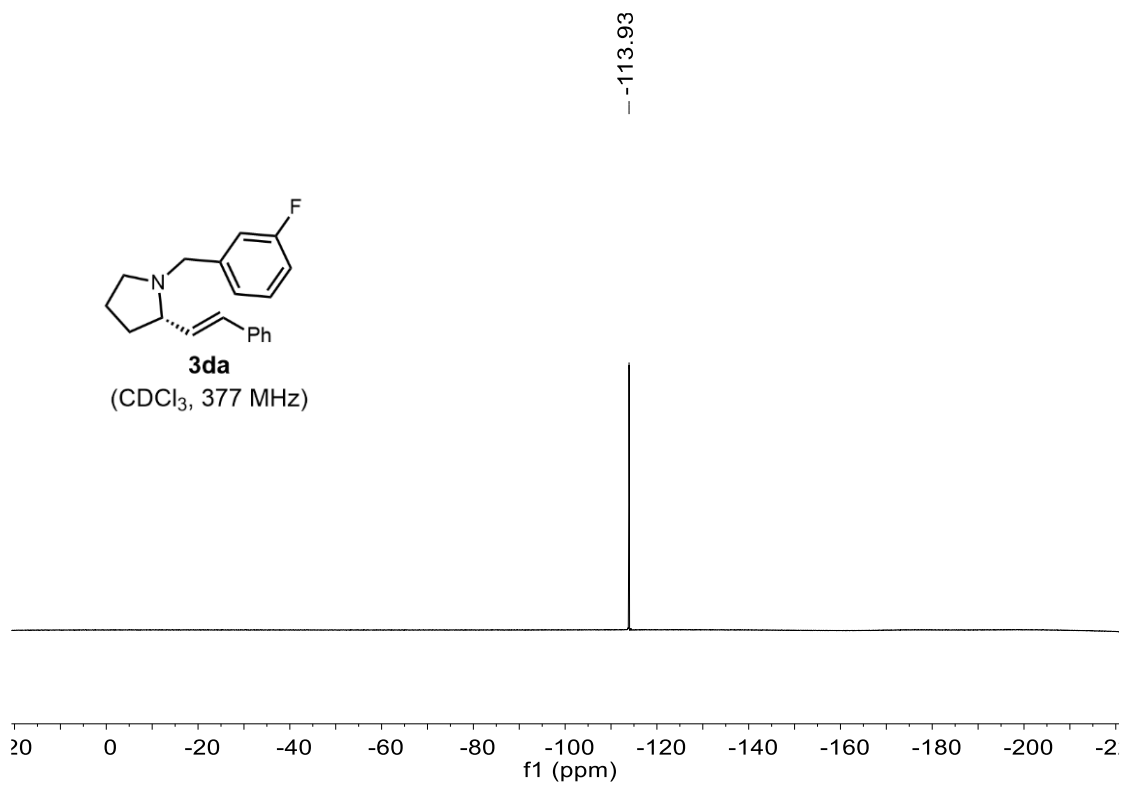

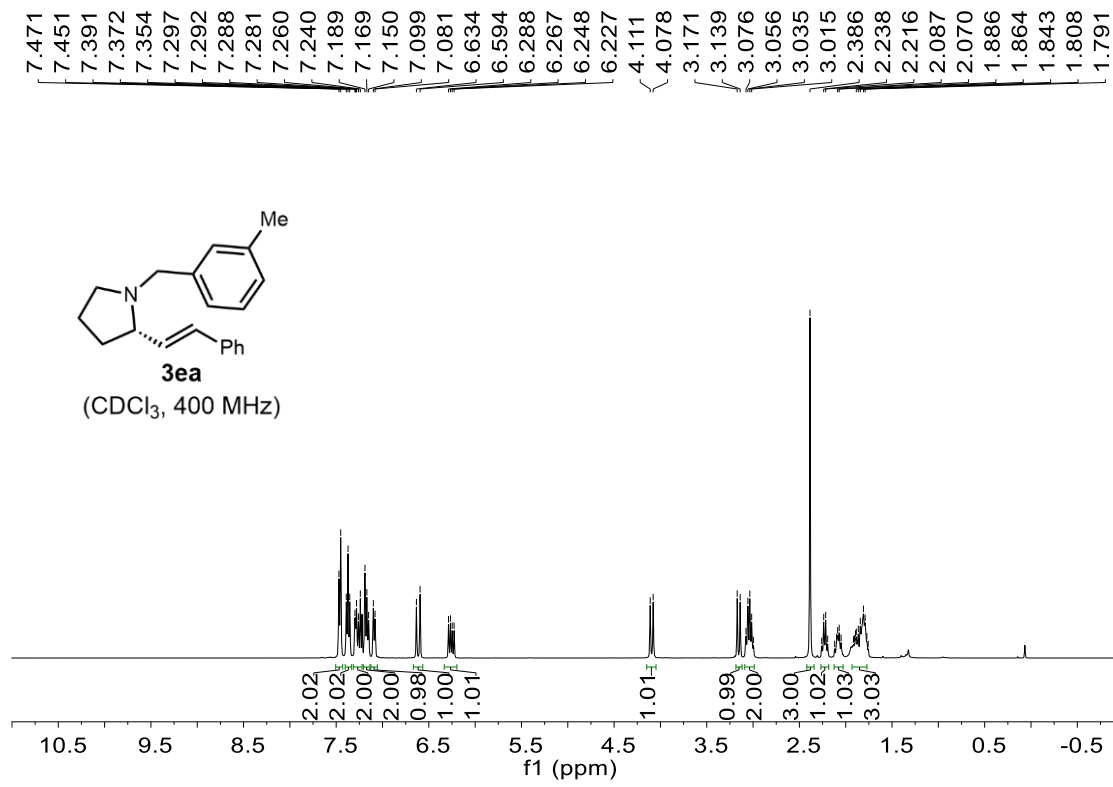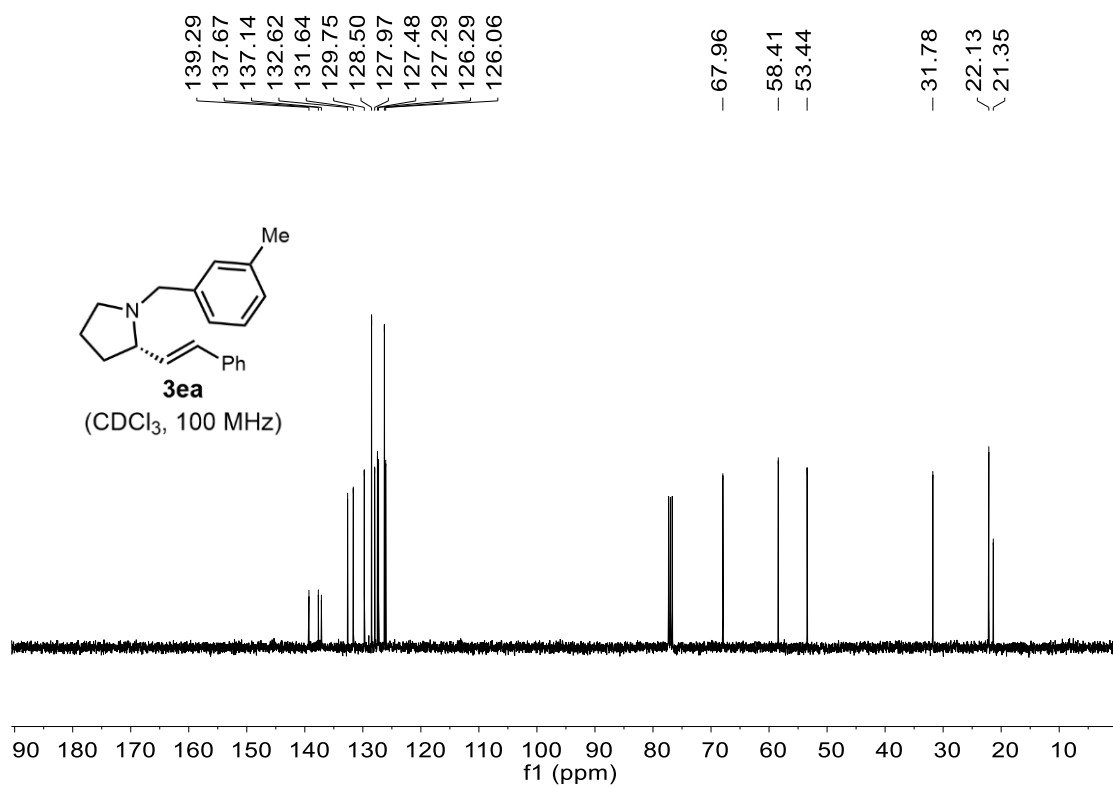

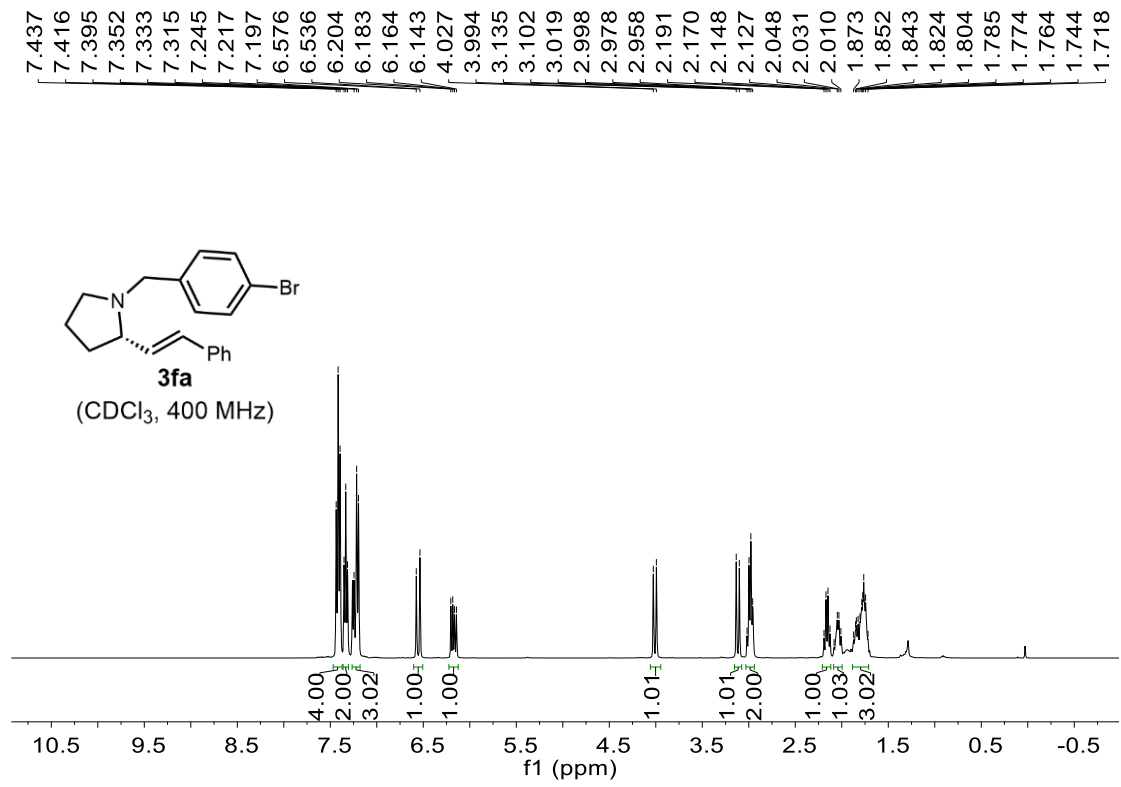

138.61  
136.99  
132.36  
131.75  
131.17  
130.57  
128.52  
127.38  
126.27  
120.47

-67.88  
-57.62  
-53.34  
-31.79  
-22.15

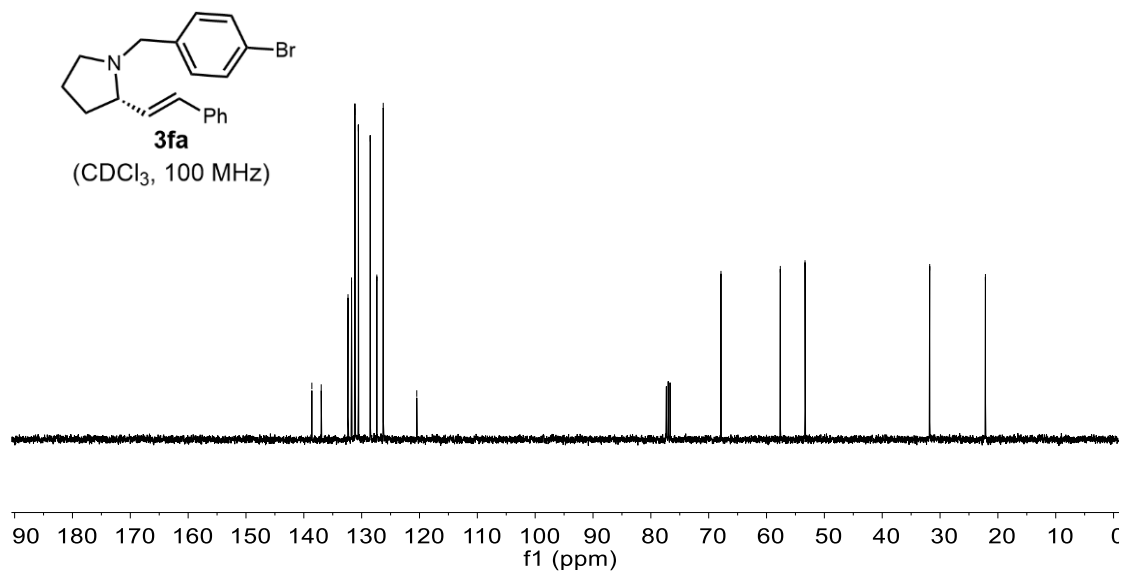



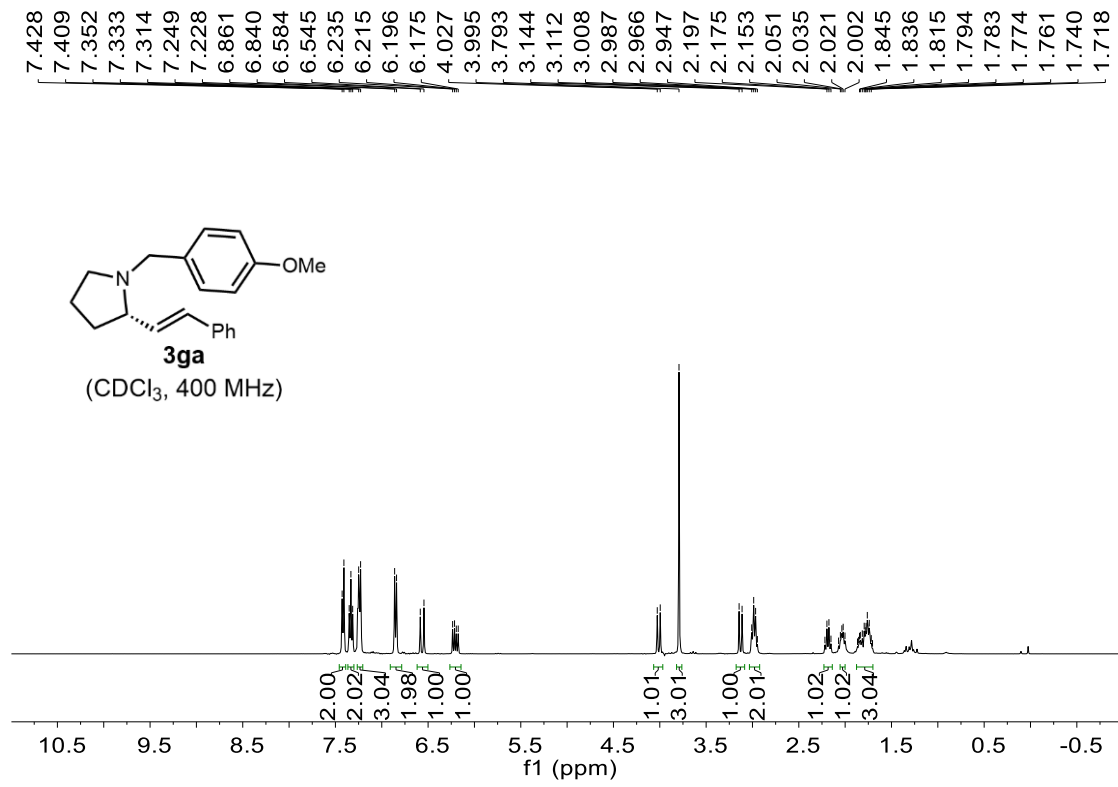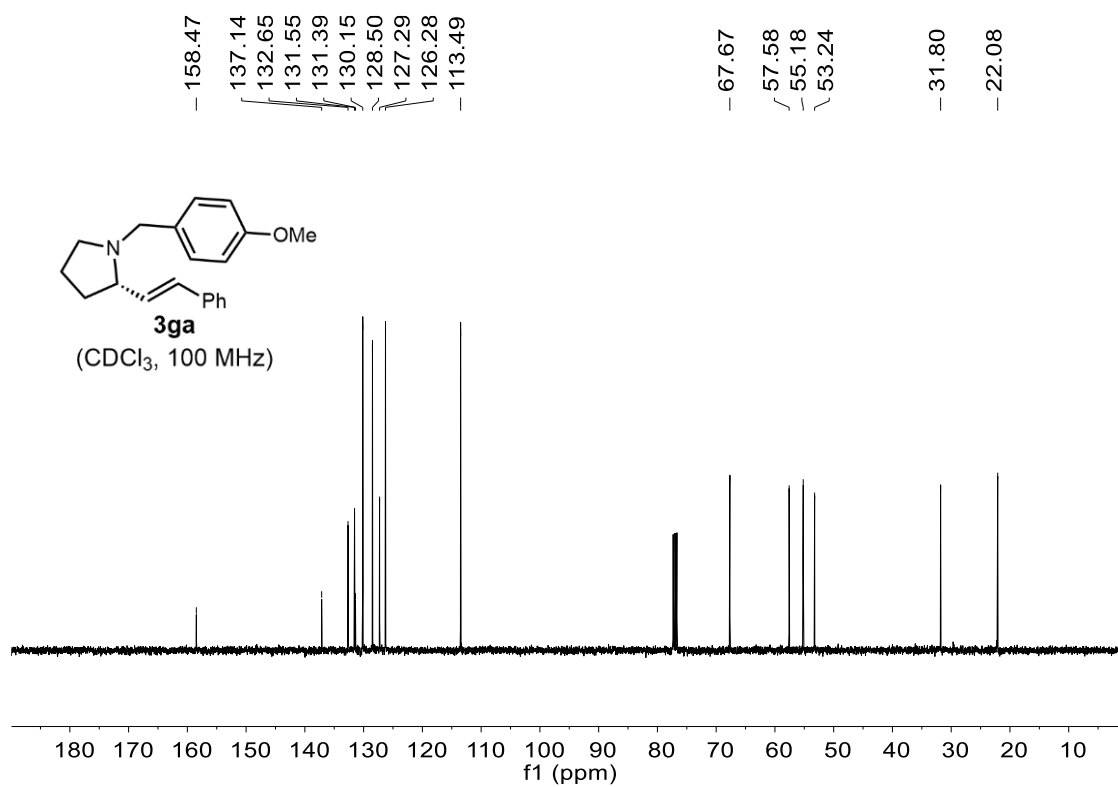

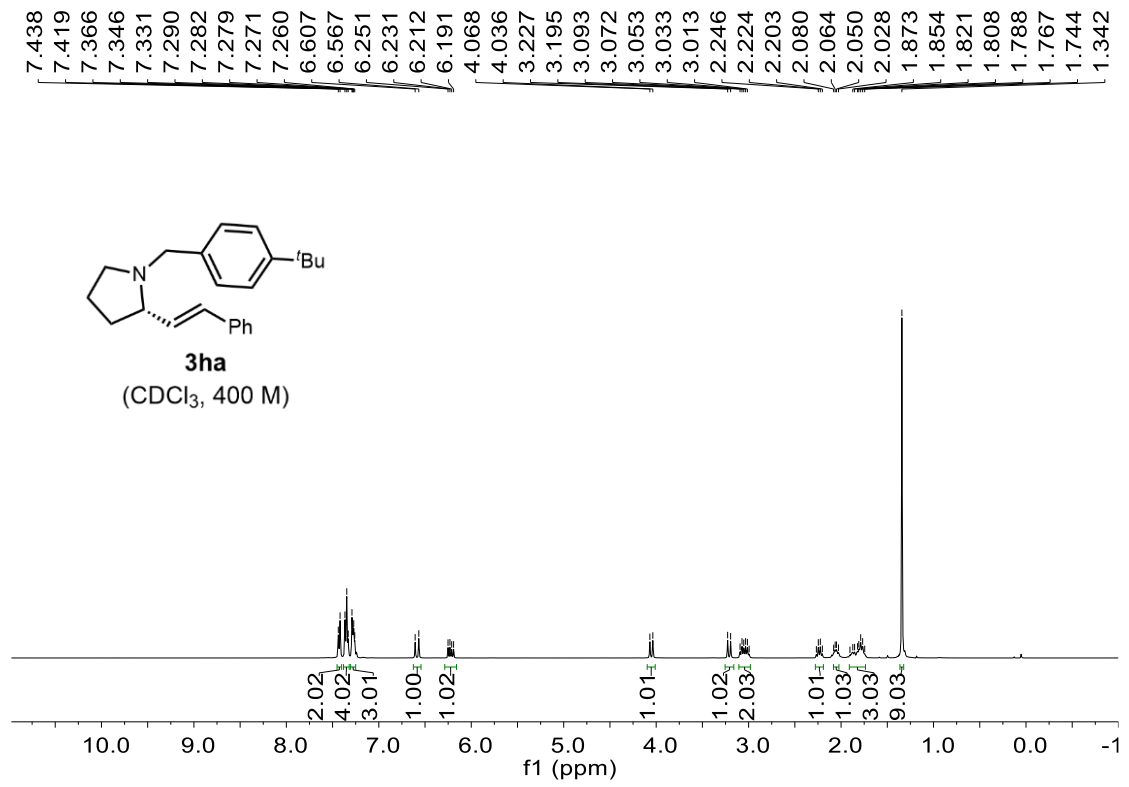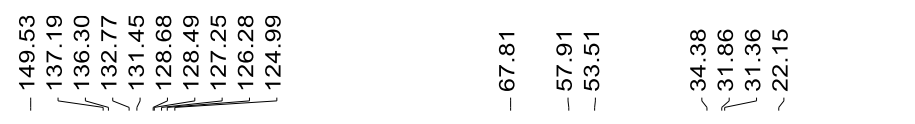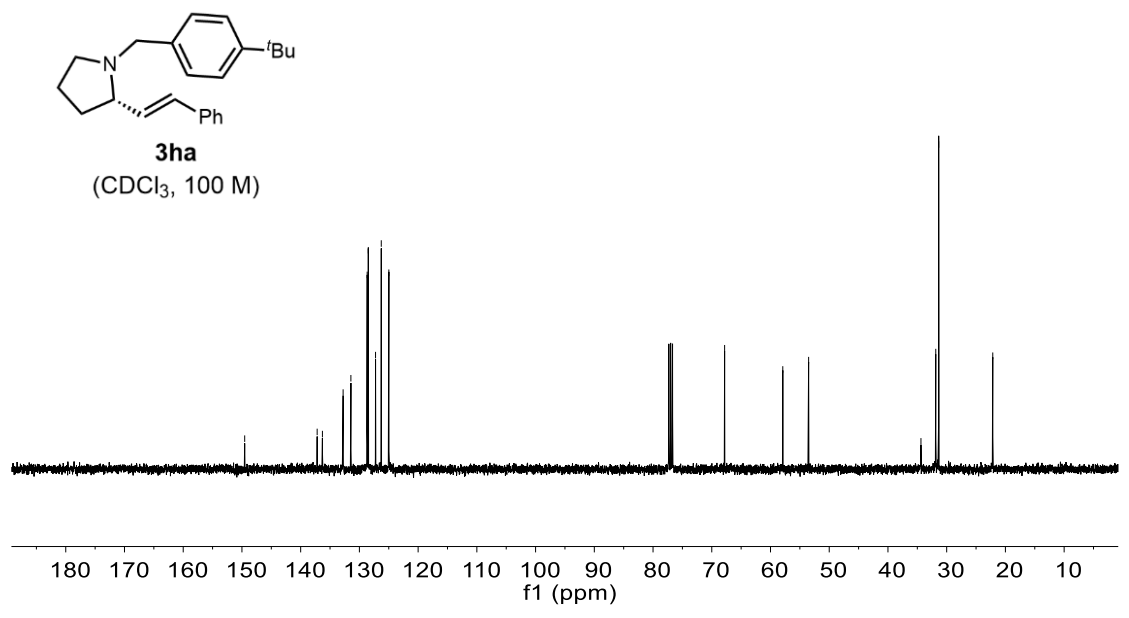

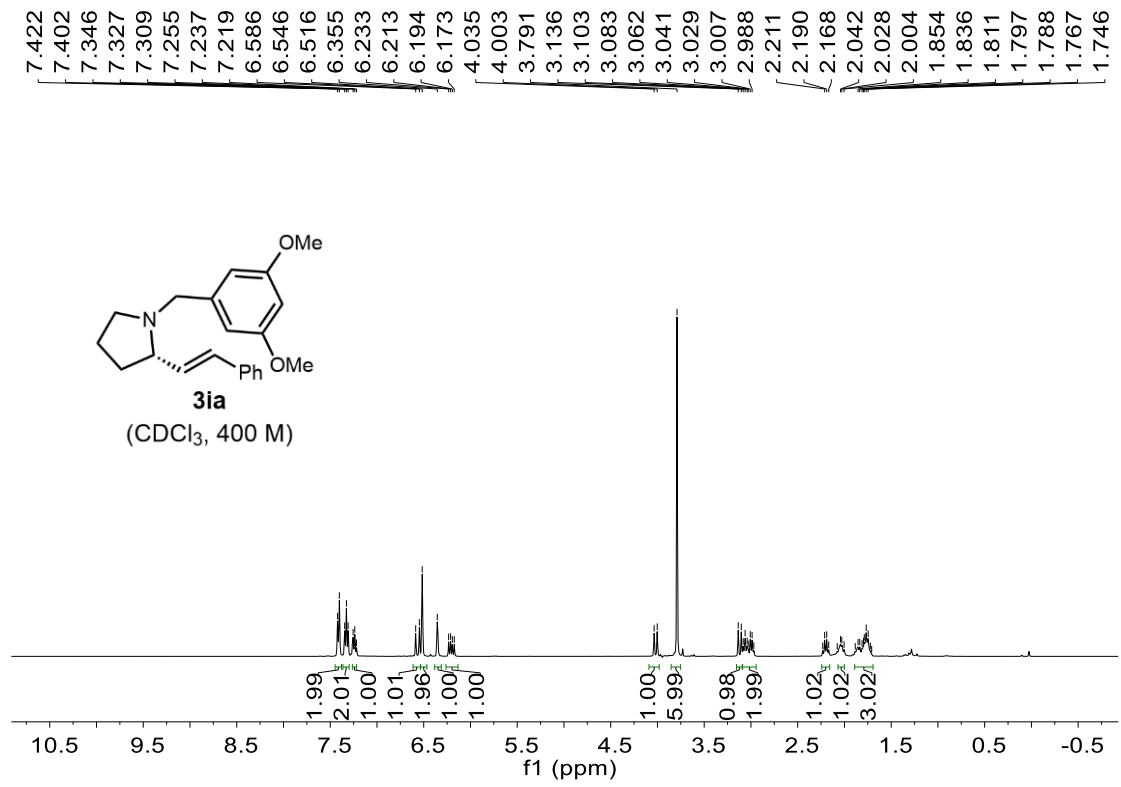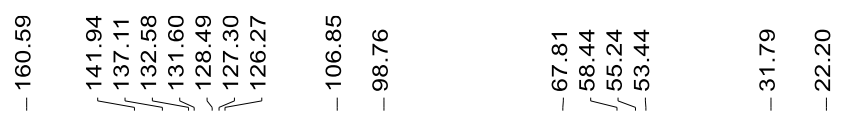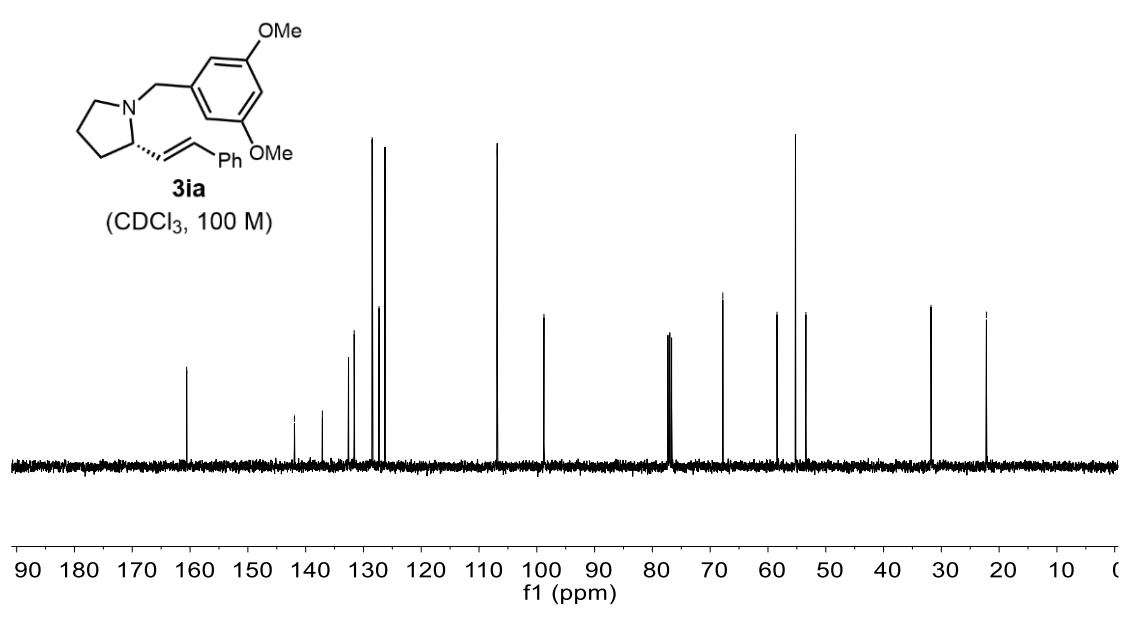

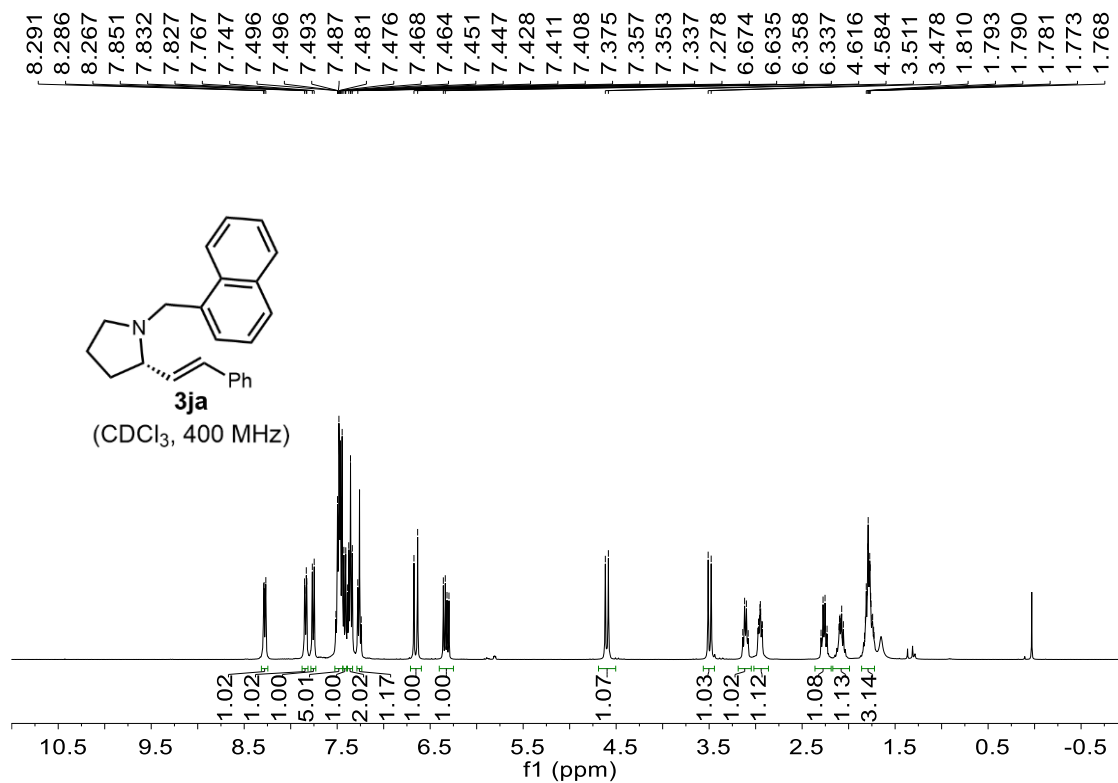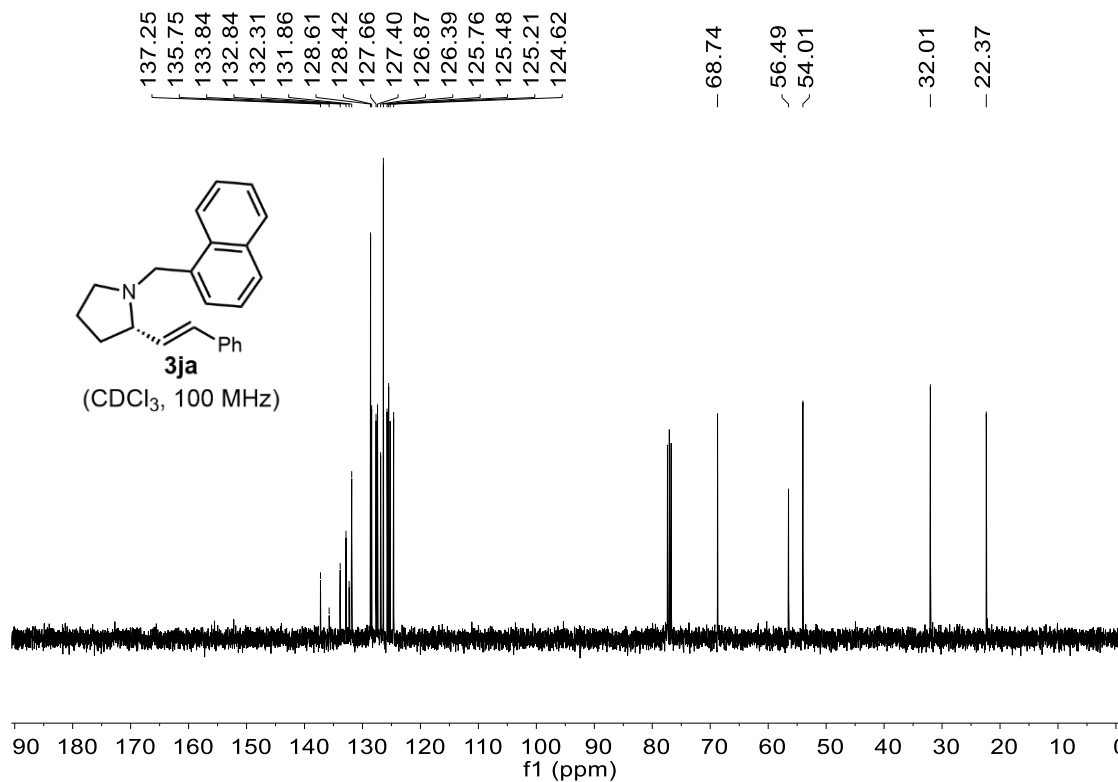

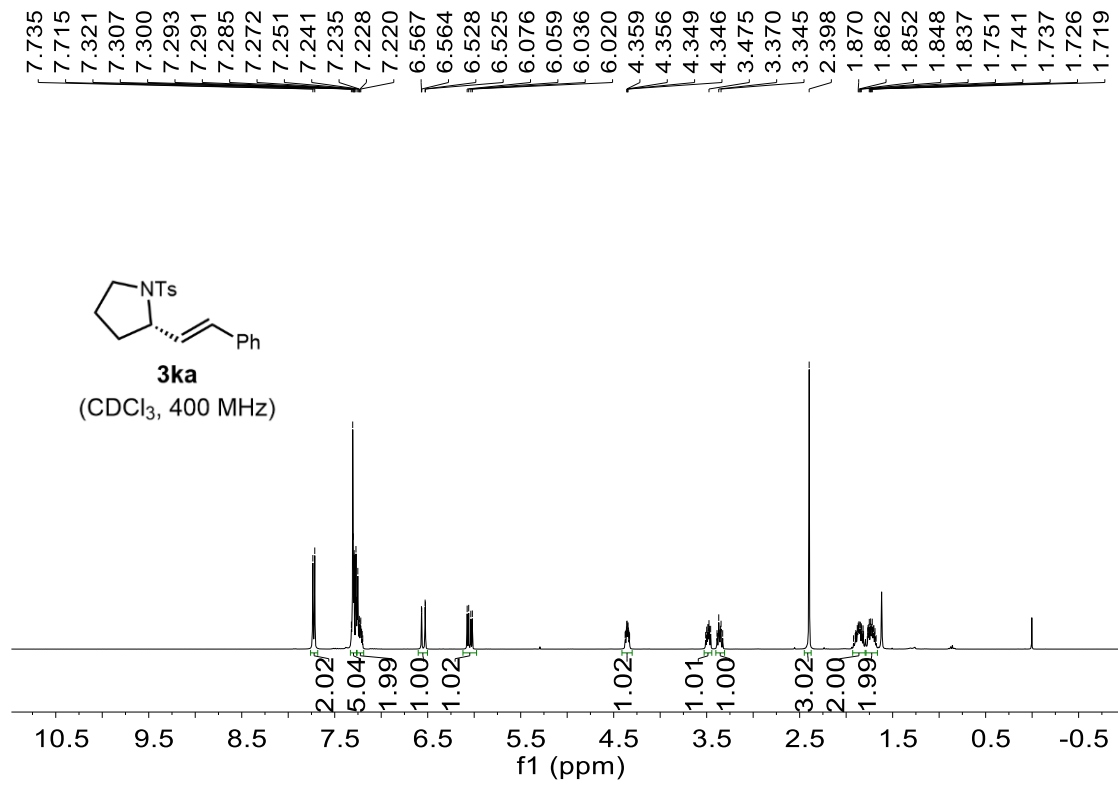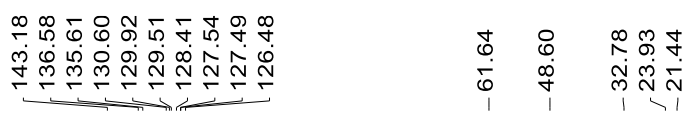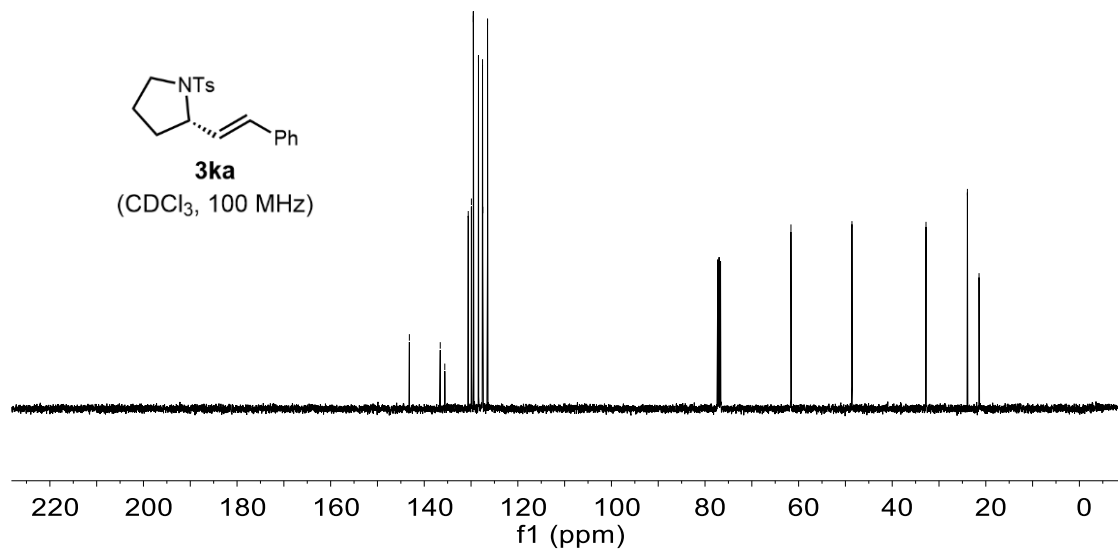

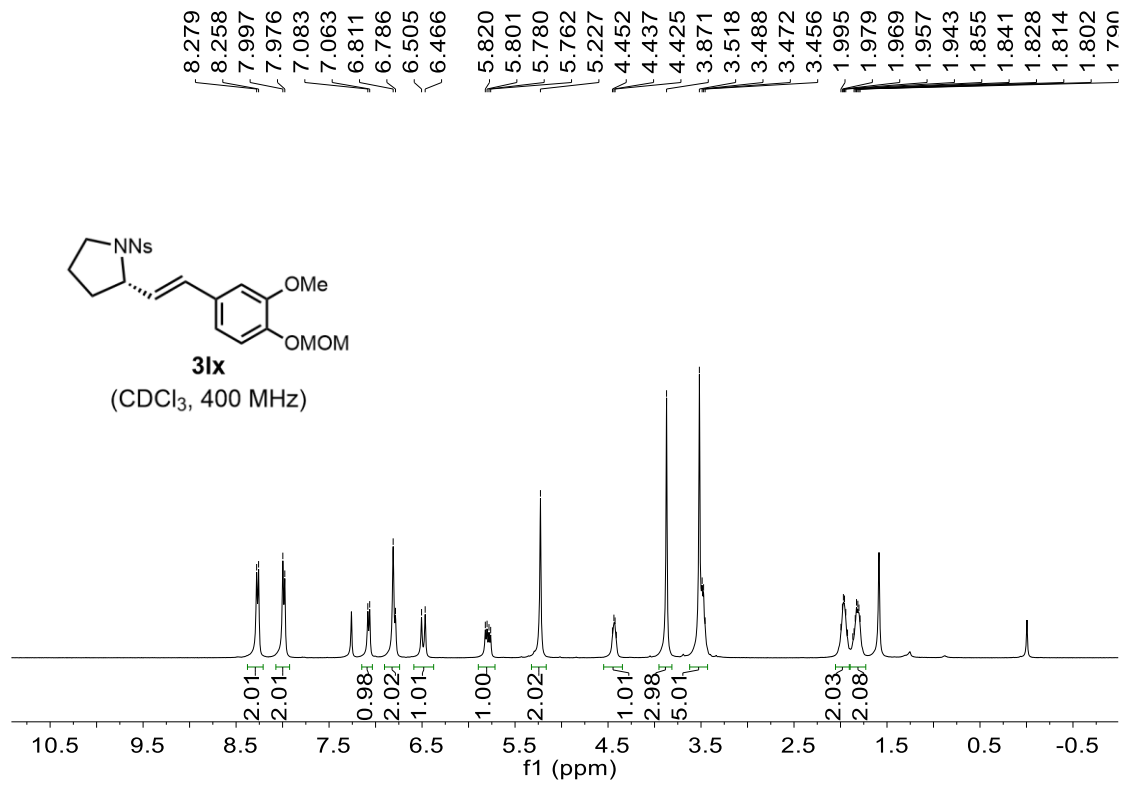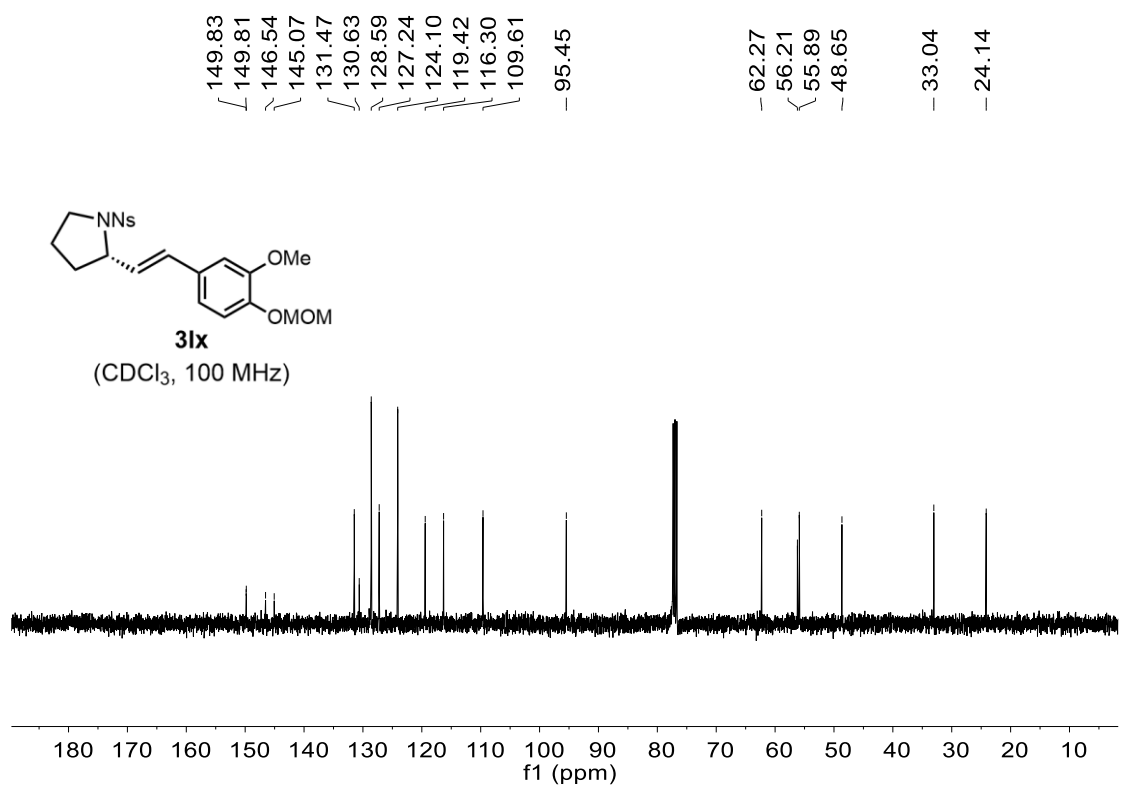

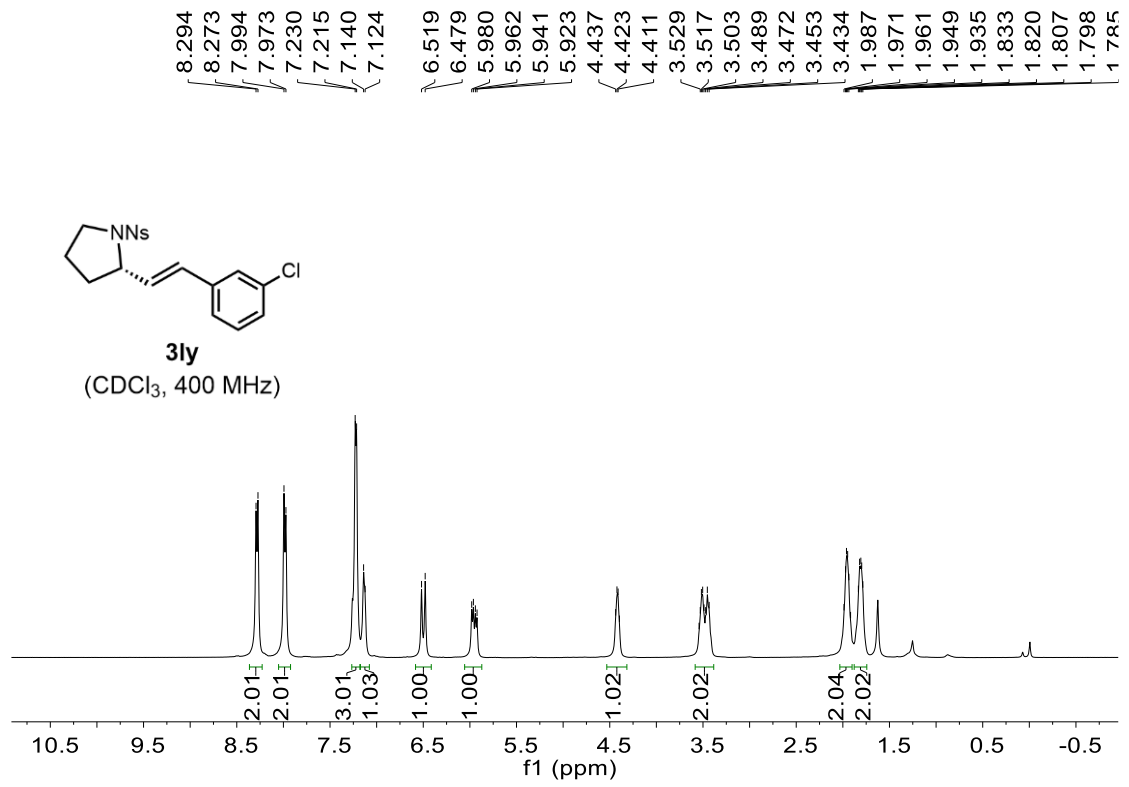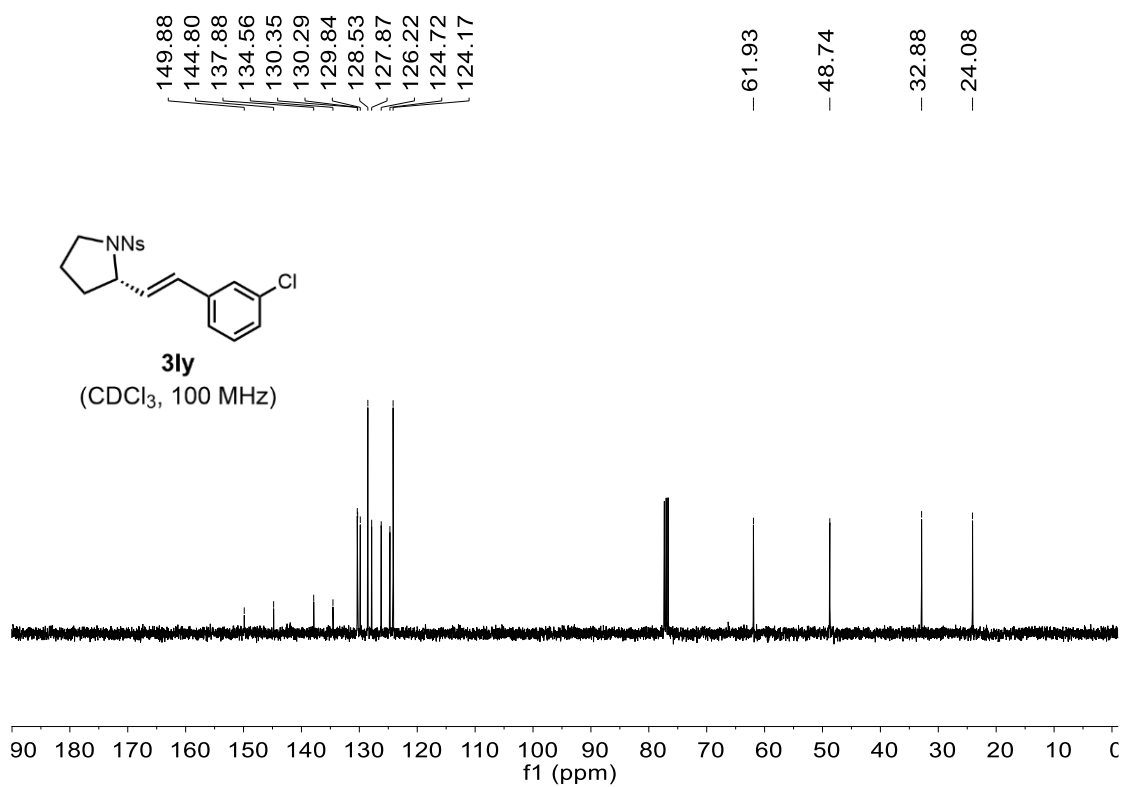

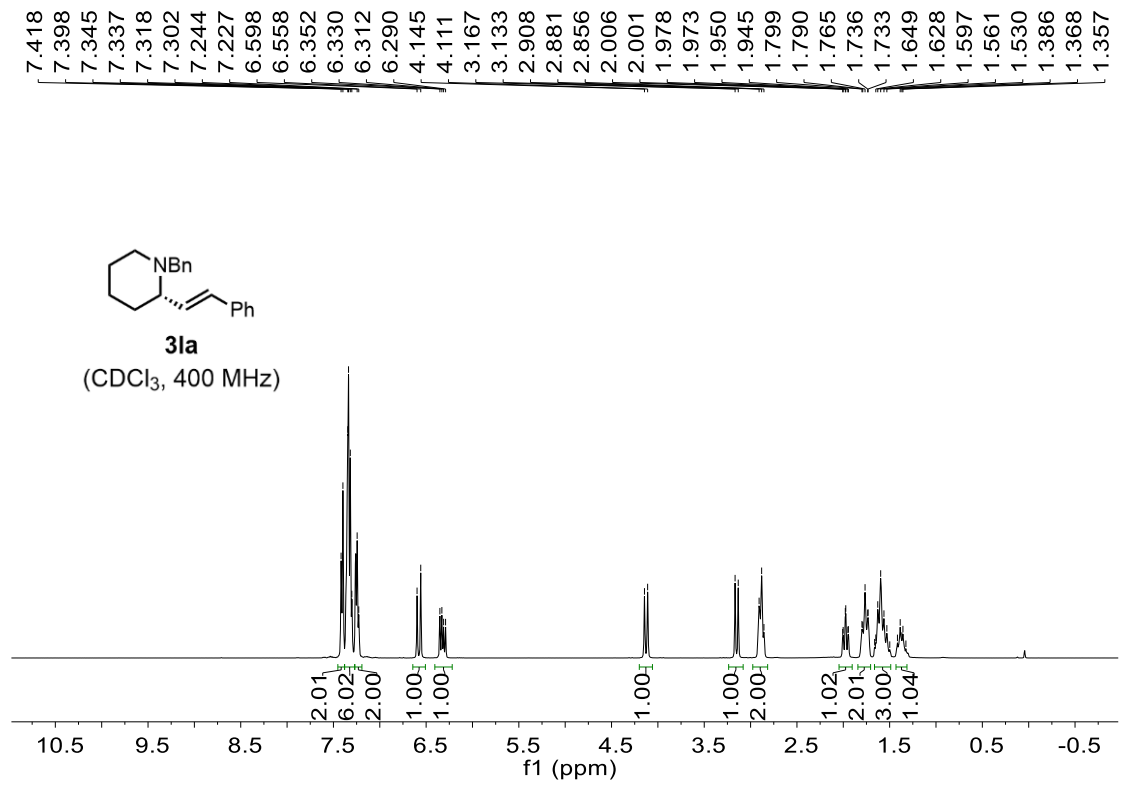

139.42  
137.23  
134.13  
130.73  
129.01  
128.50  
128.01  
127.25  
126.58  
126.20

66.02  
60.22  
52.34

33.78  
25.83  
23.97

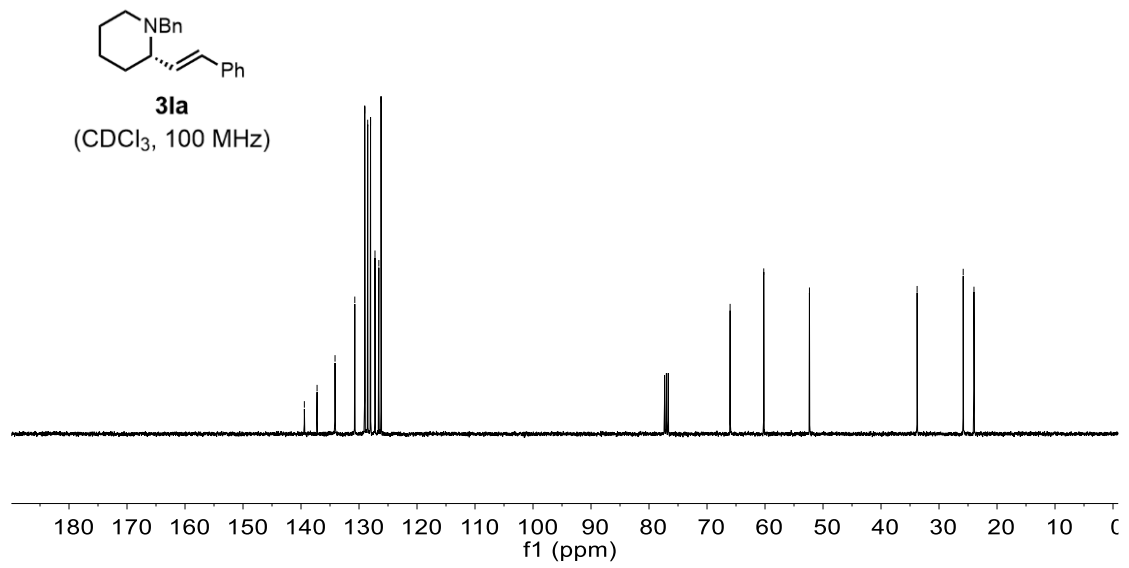



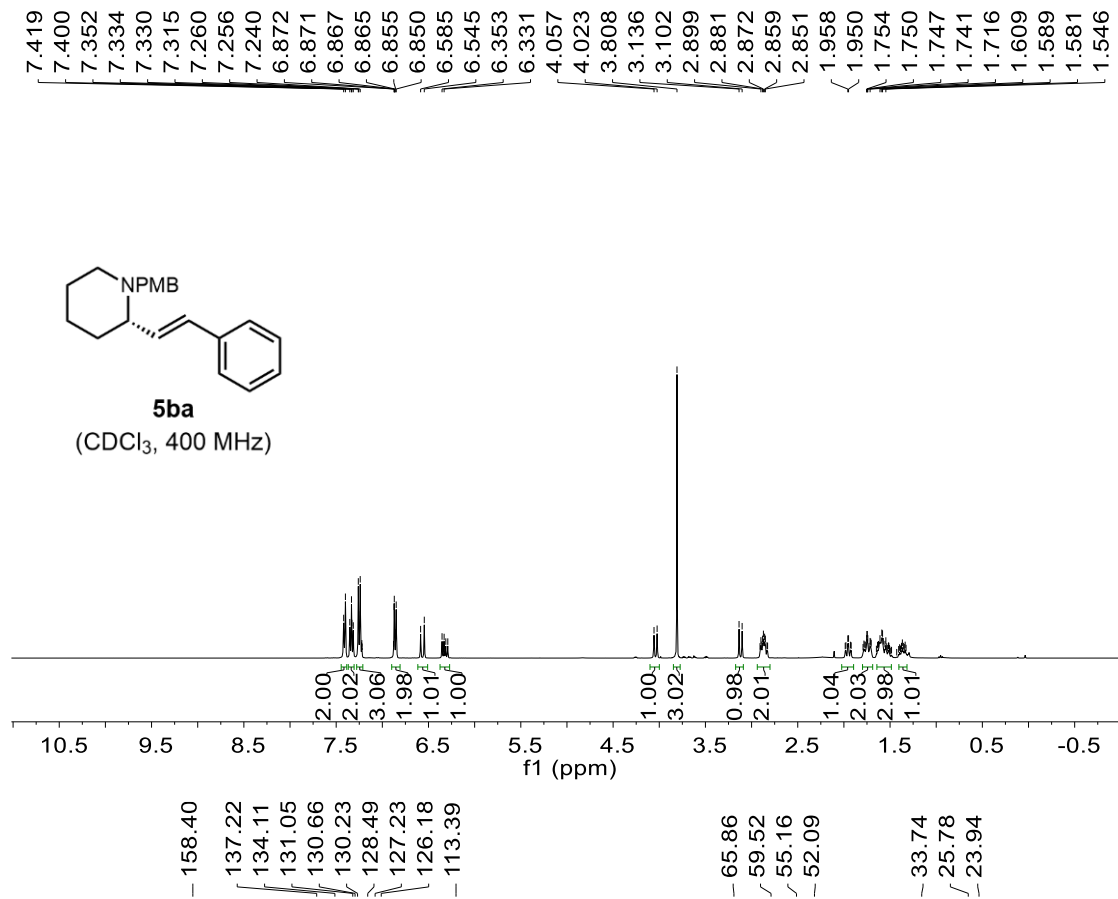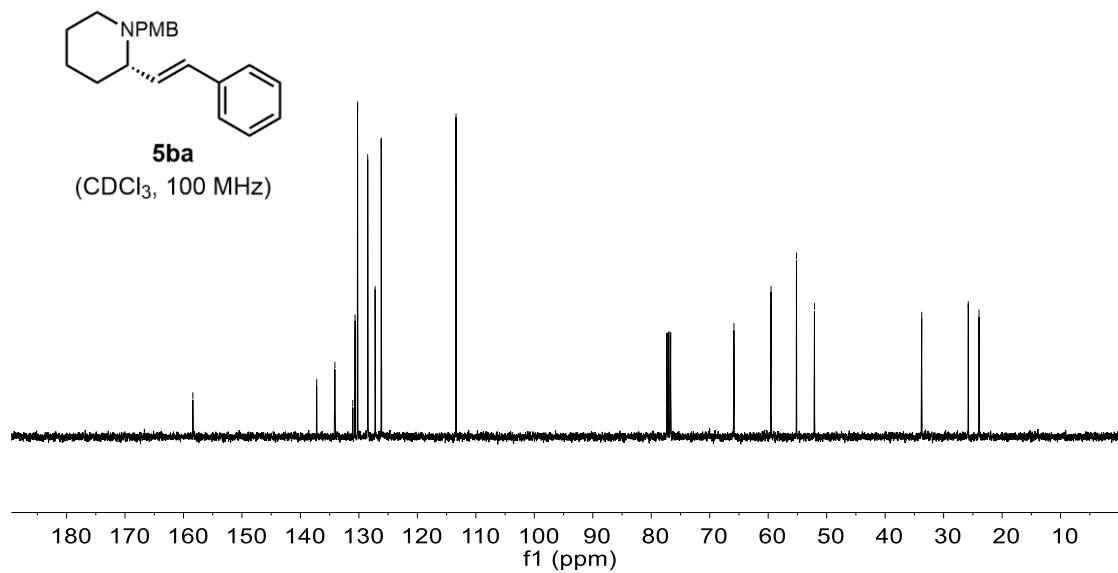

7.447  
7.442  
7.429  
7.426  
7.424  
7.422  
7.406  
7.403  
7.390  
7.387  
7.385  
7.381  
7.370  
7.366  
7.340  
7.325  
7.321  
7.308  
7.303  
7.183  
7.164  
7.131  
7.120  
7.045  
7.026  
6.940  
6.935  
6.924  
6.919  
6.504  
6.464  
6.177  
6.155  
6.137  
5.075  
4.090  
4.056  
3.082  
3.048  
2.336

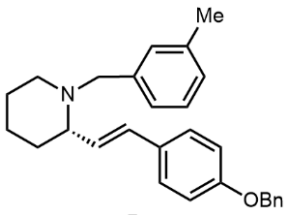

**5cz**  
(CDCl<sub>3</sub>, 400 MHz)

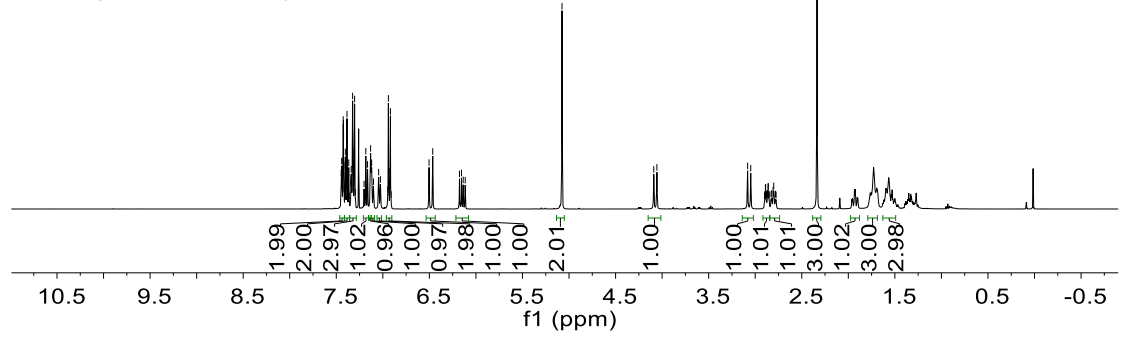

158.21  
139.28  
138.07  
137.59  
137.01  
132.12  
130.38  
130.19  
129.91  
128.60  
127.97  
127.92  
127.44  
127.39  
126.27  
- 115.00

70.07  
66.27  
60.28  
52.46

33.87  
25.85  
24.06  
21.43

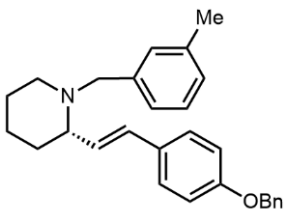

**5cz**  
(CDCl<sub>3</sub>, 100 MHz)

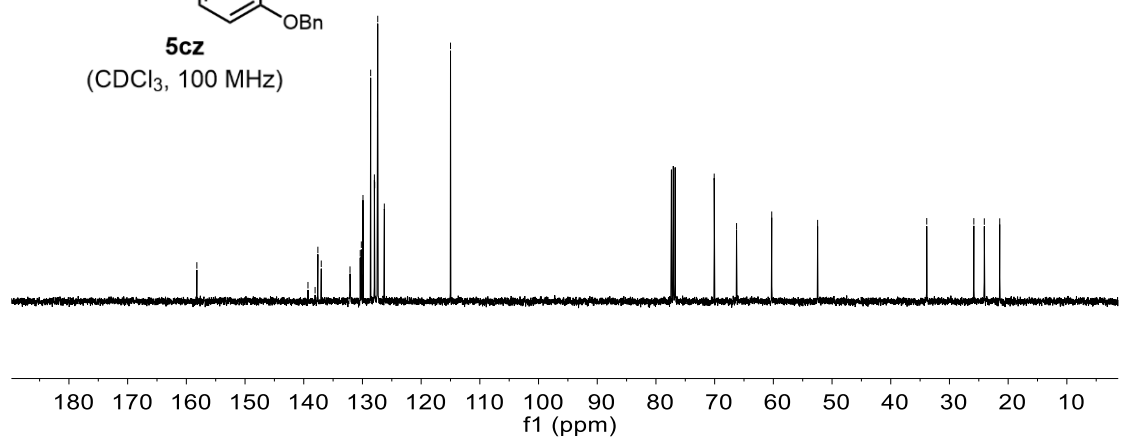

7.880  
7.863  
7.768  
7.559  
7.554  
7.551  
7.547  
7.542  
7.532  
7.527  
7.521  
7.516  
7.499  
7.479  
7.474  
7.469  
7.456  
7.449  
7.437  
7.429  
7.418  
7.412  
7.399  
7.393  
7.389  
7.377  
7.371  
7.367  
6.985  
6.980  
6.976  
6.964  
6.958  
6.954  
6.586  
5.096  
1.814  
1.802  
1.789  
1.555

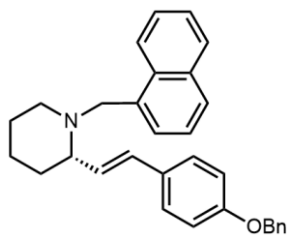

**5dz**  
(CDCl<sub>3</sub>, 400 MHz)

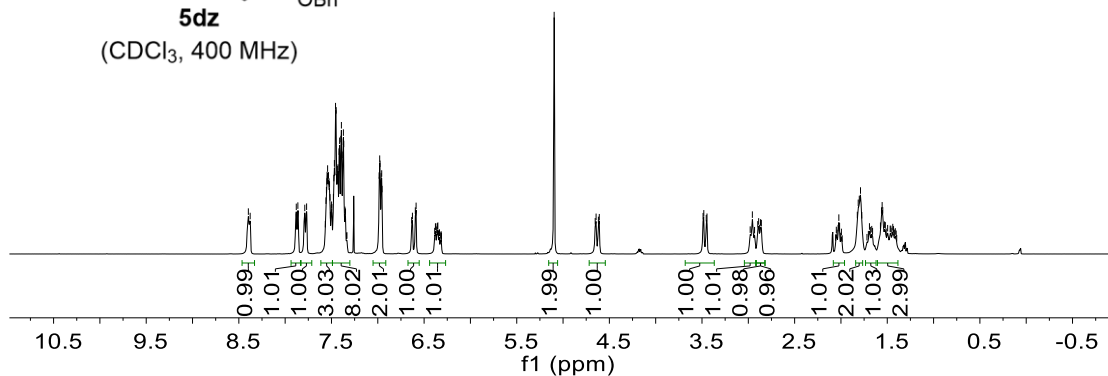

158.28  
137.05  
135.58  
133.88  
132.55  
131.66  
130.52  
130.41  
128.64  
128.45  
128.00  
127.49  
127.43  
127.18  
125.57  
125.46  
125.26  
124.78  
115.05  
70.10  
67.20  
58.46  
52.64  
33.91  
25.96  
24.08

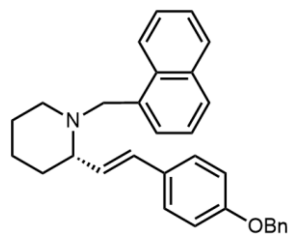

**5dz**  
(CDCl<sub>3</sub>, 100 MHz)

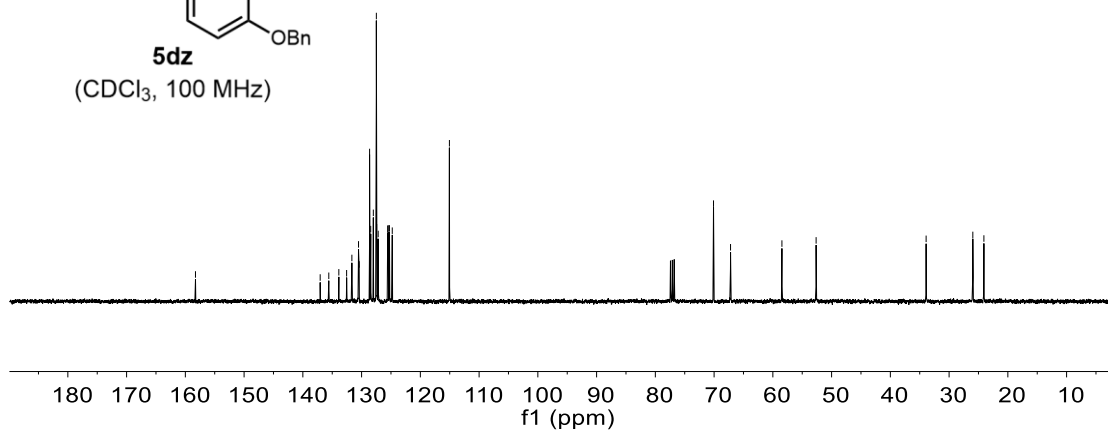

8.198  
8.193  
8.181  
8.176  
7.958  
7.952  
7.946  
7.934  
7.929  
7.280  
7.263  
7.249  
7.245  
7.237  
7.233  
7.220  
7.156  
7.151  
7.145  
7.140  
7.135  
7.132  
6.434  
6.393  
6.012  
5.994  
5.972  
5.954  
4.780  
4.771  
3.061  
1.805  
1.795  
1.786  
1.777  
1.616  
1.607  
1.543  
1.532  
1.518

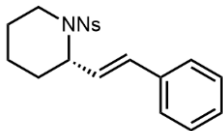

**5ea**

(CDCl<sub>3</sub>, 400 MHz)

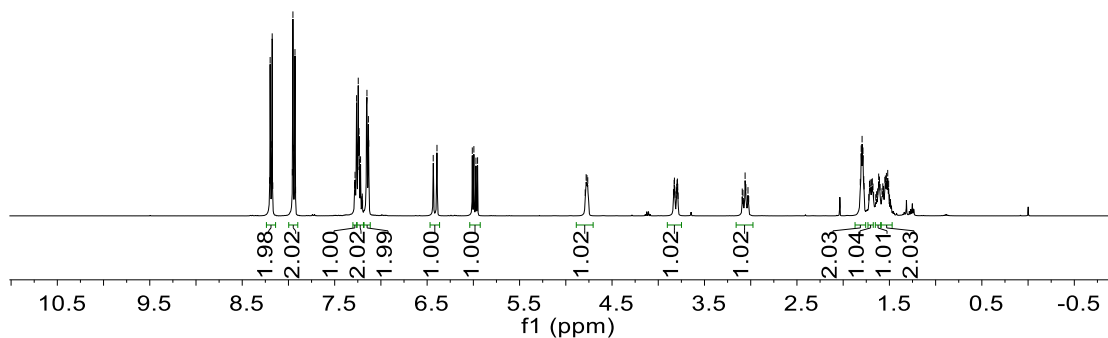

149.54  
146.09  
135.80  
132.92  
128.54  
128.49  
128.02  
126.11  
124.87  
123.95

55.68

42.22

30.68

25.09

18.92

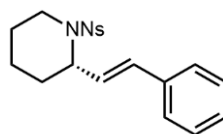

**5ea**

(CDCl<sub>3</sub>, 100 MHz)

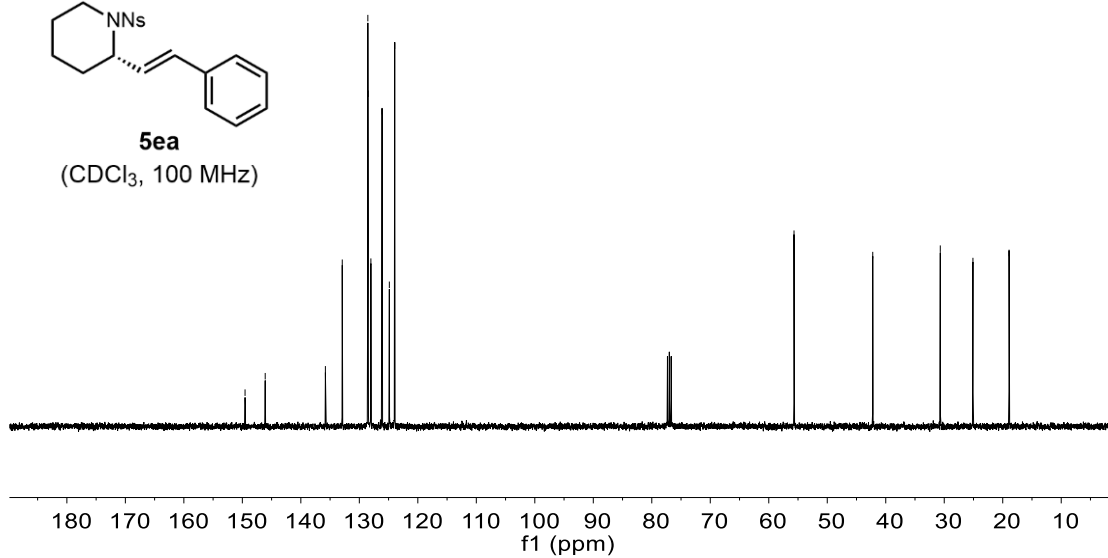

7.446  
7.441  
7.441  
7.429  
7.425  
7.344  
7.329  
7.325  
7.311  
7.309  
7.304  
7.291  
7.289  
7.253  
7.245  
7.240  
7.236  
7.229  
7.224  
6.515  
6.475  
6.316  
6.294  
6.276  
6.254  
4.089  
4.055  
3.147  
3.113  
2.866  
2.861  
2.857  
1.968  
1.959  
1.597  
1.592  
1.582  
1.577  
1.573  
1.544

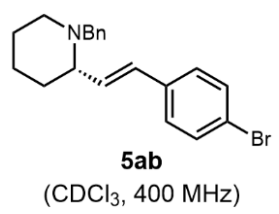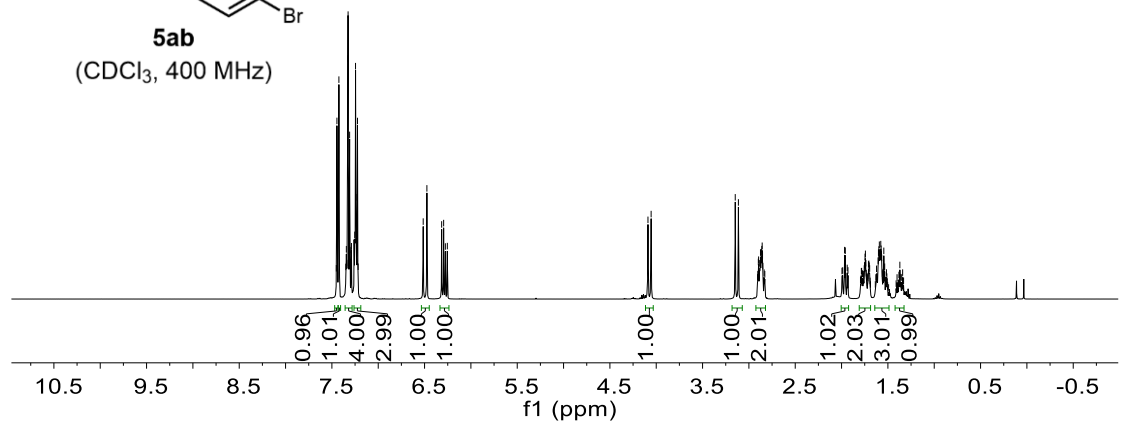

139.36  
136.15  
135.03  
131.56  
129.50  
128.94  
128.04  
127.72  
126.62  
120.91

65.99  
60.29  
52.36  
33.66  
25.77  
23.91

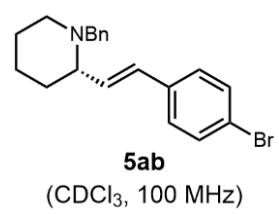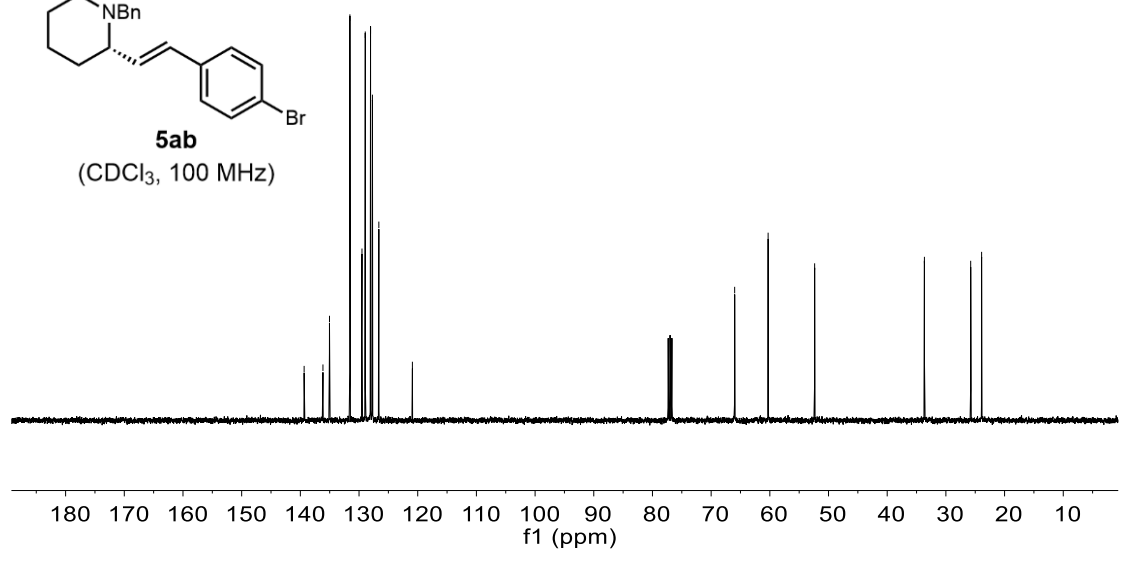

7.386  
7.381  
7.372  
7.365  
7.355  
7.351  
7.347  
7.340  
7.333  
7.323  
7.318  
7.303  
7.265  
7.248  
7.140  
7.121  
7.051  
7.047  
7.032  
7.029  
7.026  
7.003  
6.998  
6.987  
6.982  
6.573  
6.533  
6.267  
6.246  
4.155  
4.121  
3.166  
3.132  
2.887  
1.980  
1.971  
1.768  
1.605  
1.597  
1.588

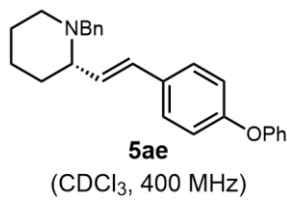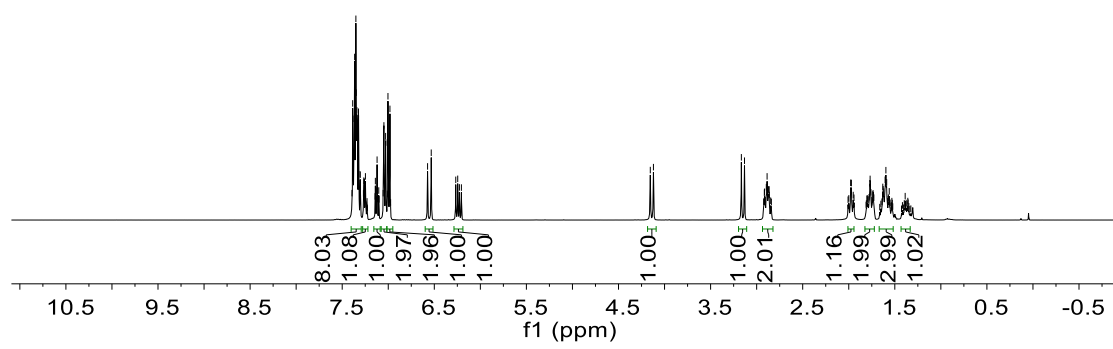

157.23  
156.42  
139.38  
133.20  
132.50  
129.90  
129.66  
128.99  
128.00  
127.49  
126.58  
123.13  
119.00  
118.68  
66.05  
60.20  
52.34  
33.78  
25.79  
23.96

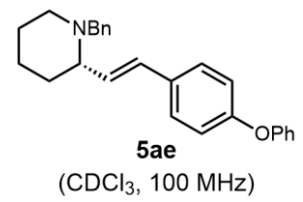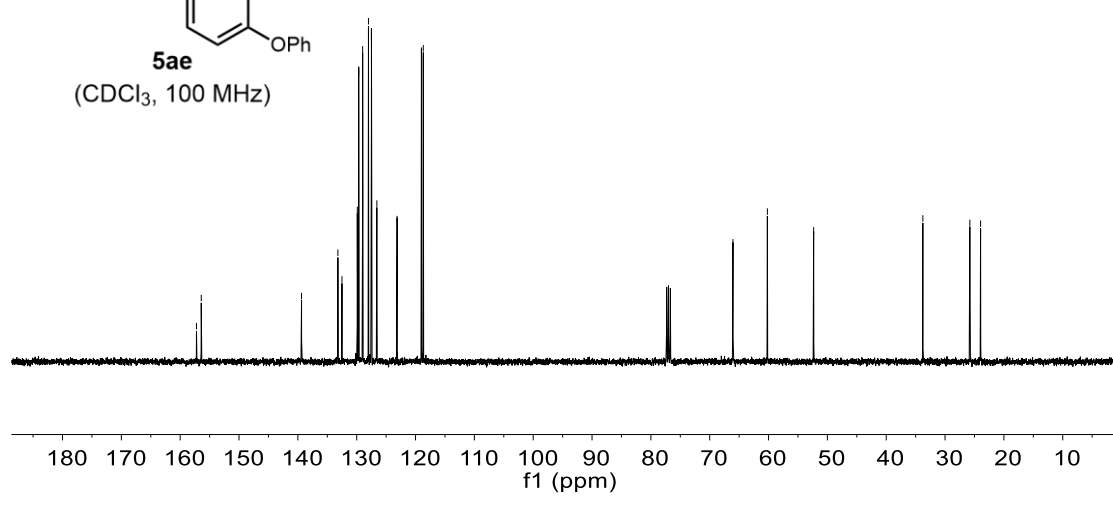

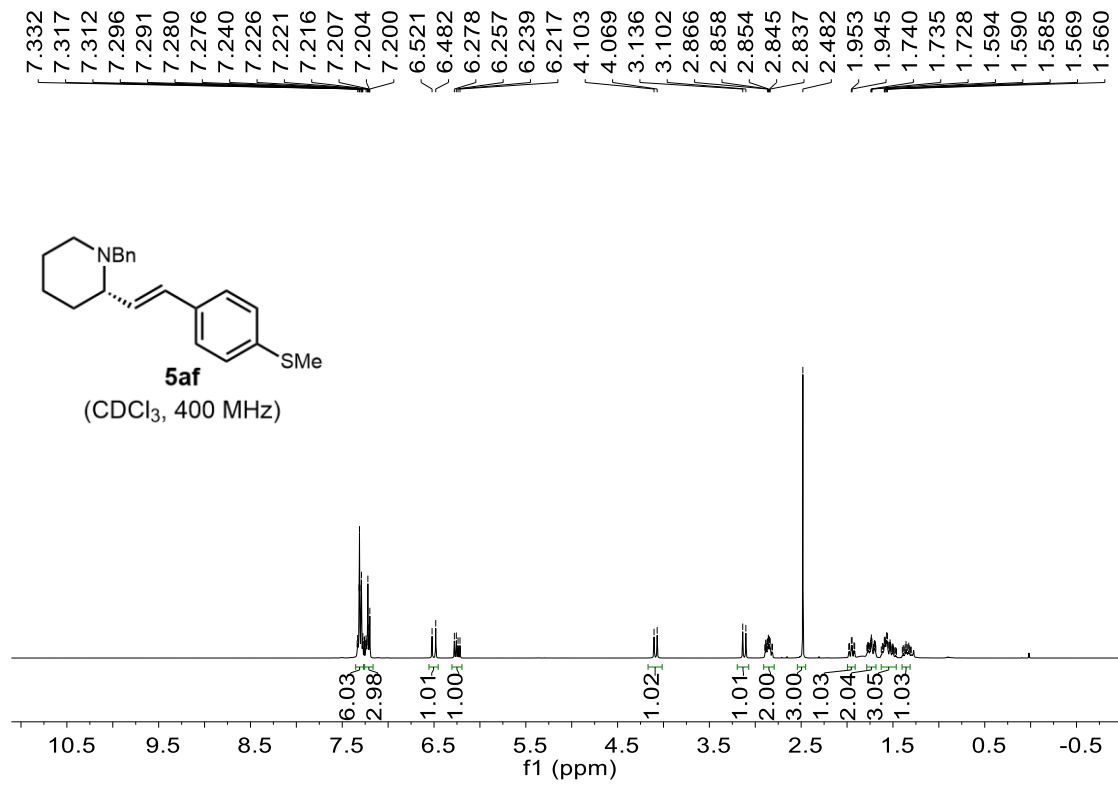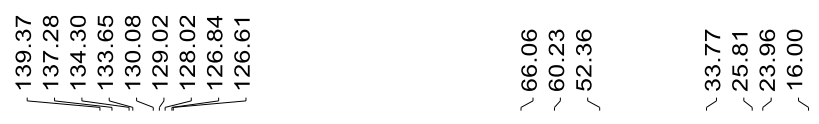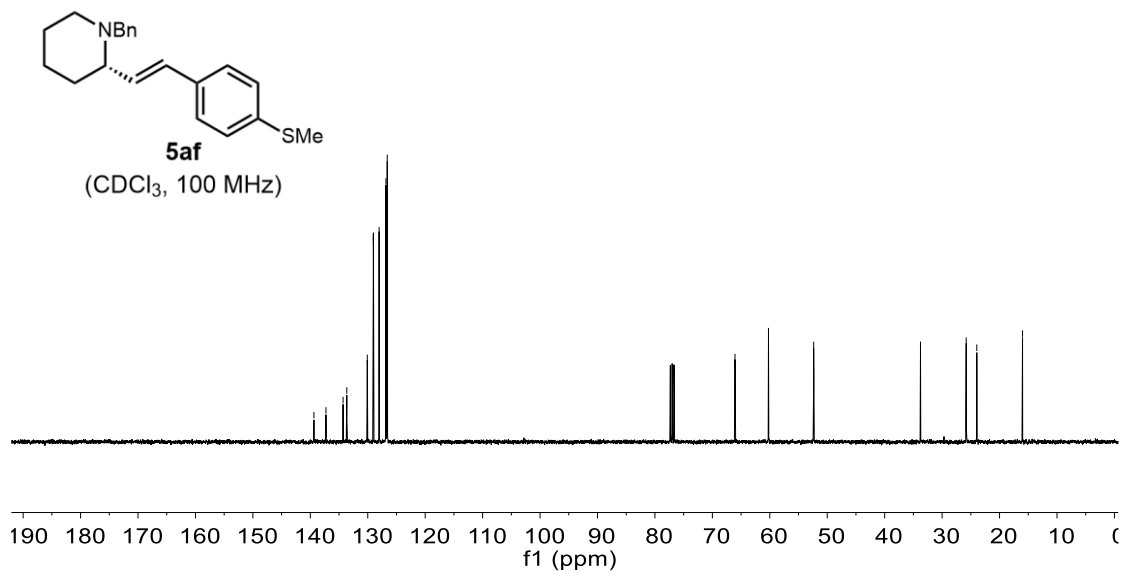

7.614  
7.610  
7.596  
7.592  
7.590  
7.573  
7.569  
7.557  
7.552  
7.469  
7.463  
7.460  
7.455  
7.452  
7.448  
7.441  
7.437  
7.422  
7.361  
7.353  
7.348  
7.342  
7.337  
7.332  
7.328  
7.323  
7.321  
7.304  
7.299  
7.285  
7.230  
6.615  
6.575  
4.133  
4.099  
3.168  
3.134  
2.880  
1.755  
1.590

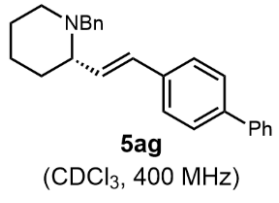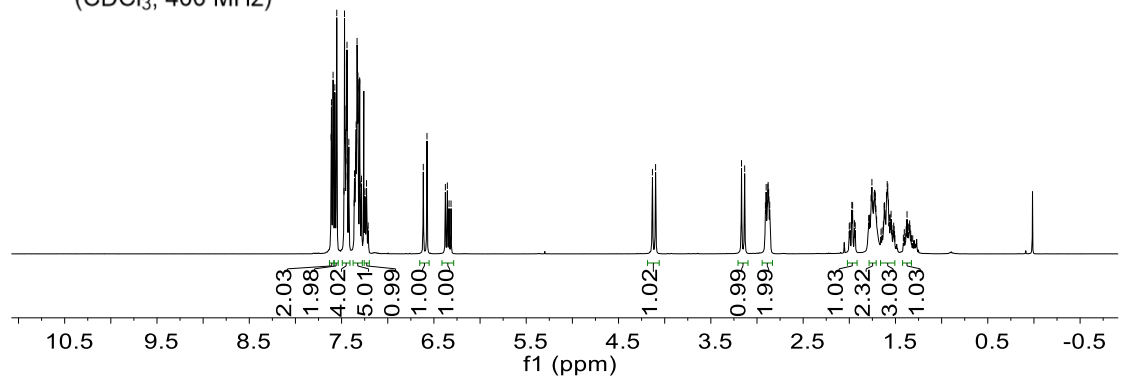

140.77  
140.08  
139.36  
136.29  
134.30  
130.30  
129.07  
128.75  
128.04  
127.23  
126.91  
126.63  
66.09  
60.27  
52.36  
33.78  
25.83  
23.98

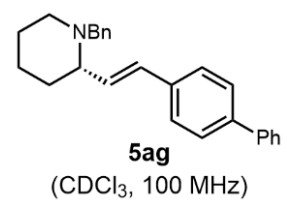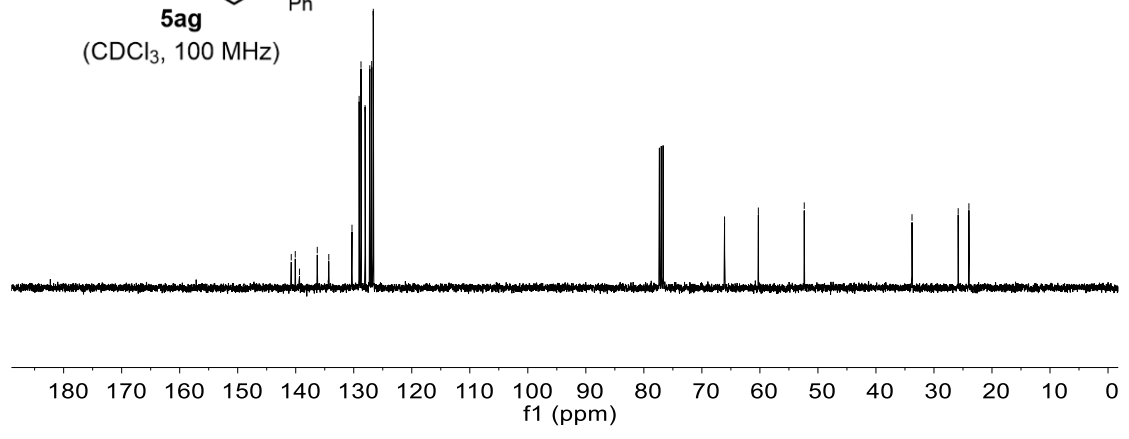



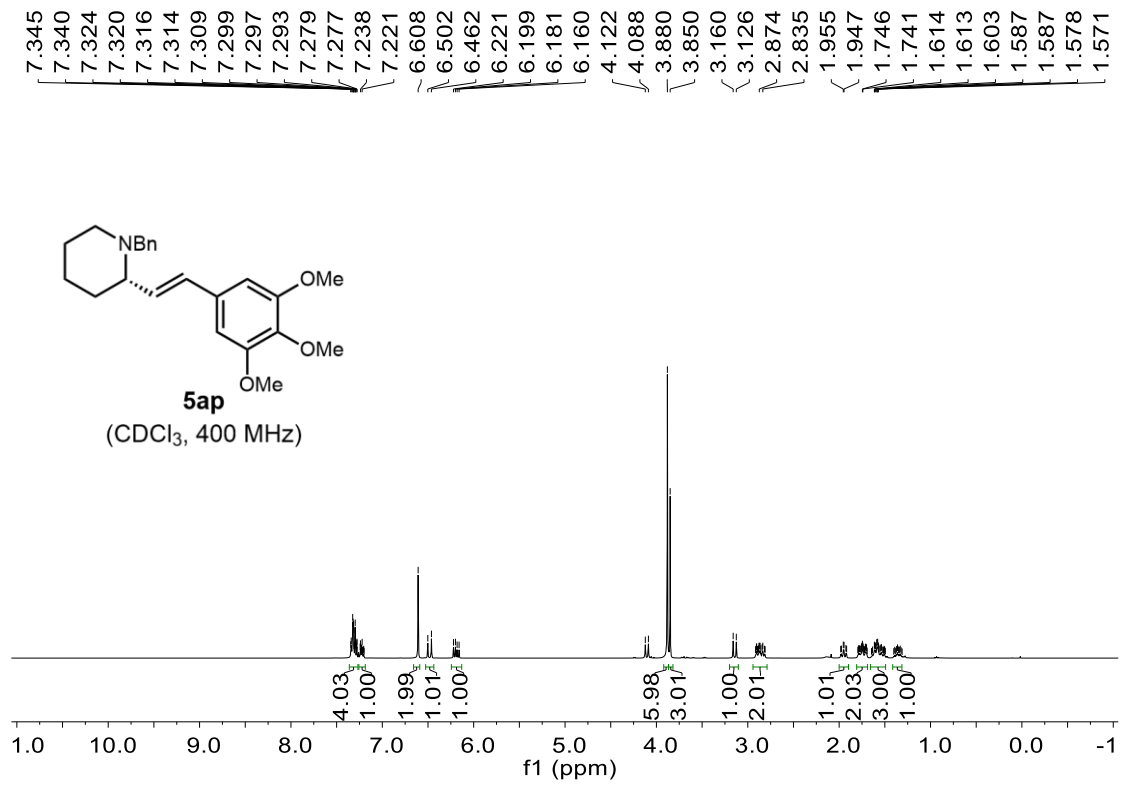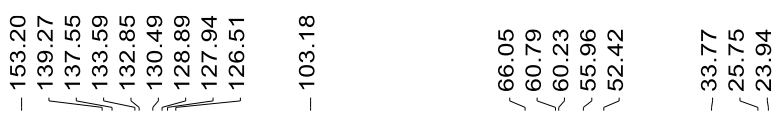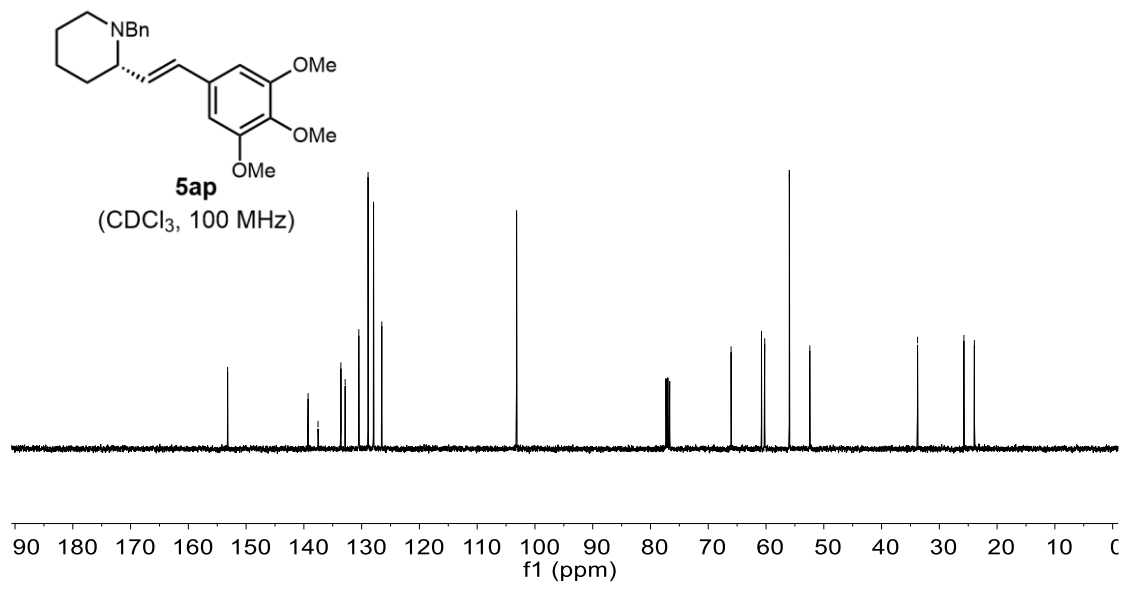

8.171  
8.151  
7.890  
7.869  
7.808  
7.787  
7.626  
7.608  
7.550  
7.546  
7.535  
7.532  
7.529  
7.526  
7.517  
7.514  
7.493  
7.473  
7.416  
7.412  
7.396  
7.365  
7.361  
7.348  
7.344  
7.341  
7.328  
7.324  
7.287  
7.273  
4.246  
4.212  
3.280  
3.246  
1.851  
1.848  
1.843  
1.839  
1.641  
1.634

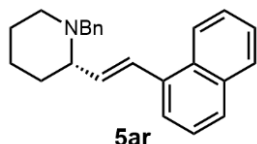

(CDCl<sub>3</sub>, 400 MHz)

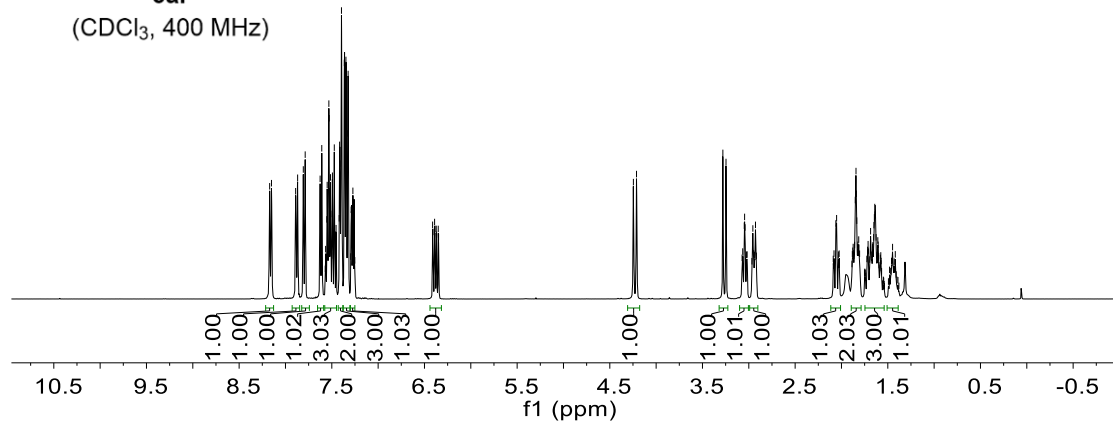

139.37  
137.30  
134.96  
133.60  
131.08  
129.09  
128.49  
128.05  
127.91  
127.61  
126.64  
125.90  
125.65  
125.61  
123.75

66.16  
60.31  
52.36

33.90  
25.85  
23.95

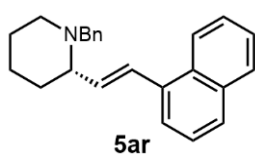

(CDCl<sub>3</sub>, 100 MHz)

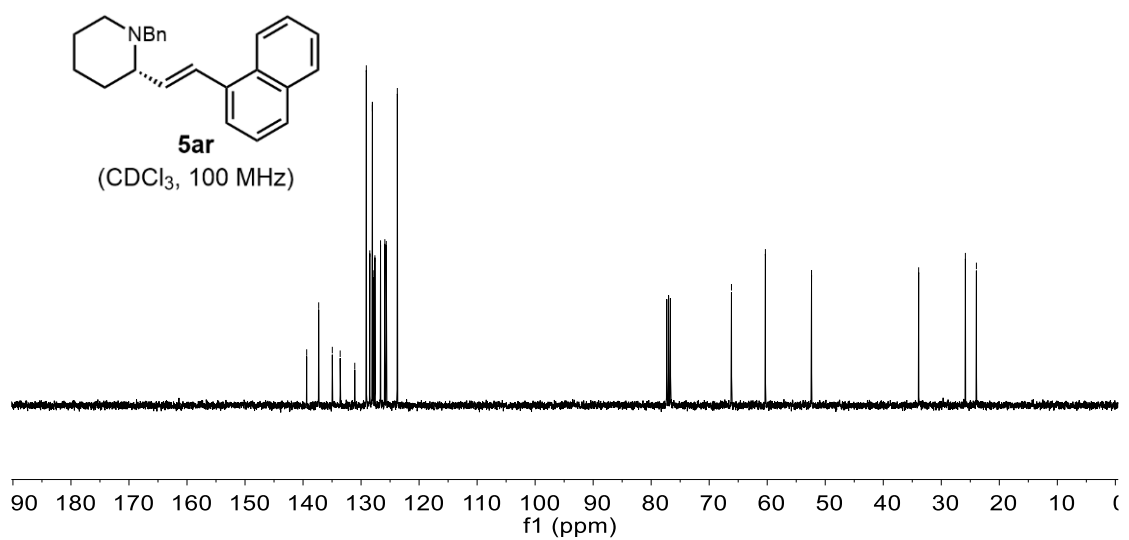

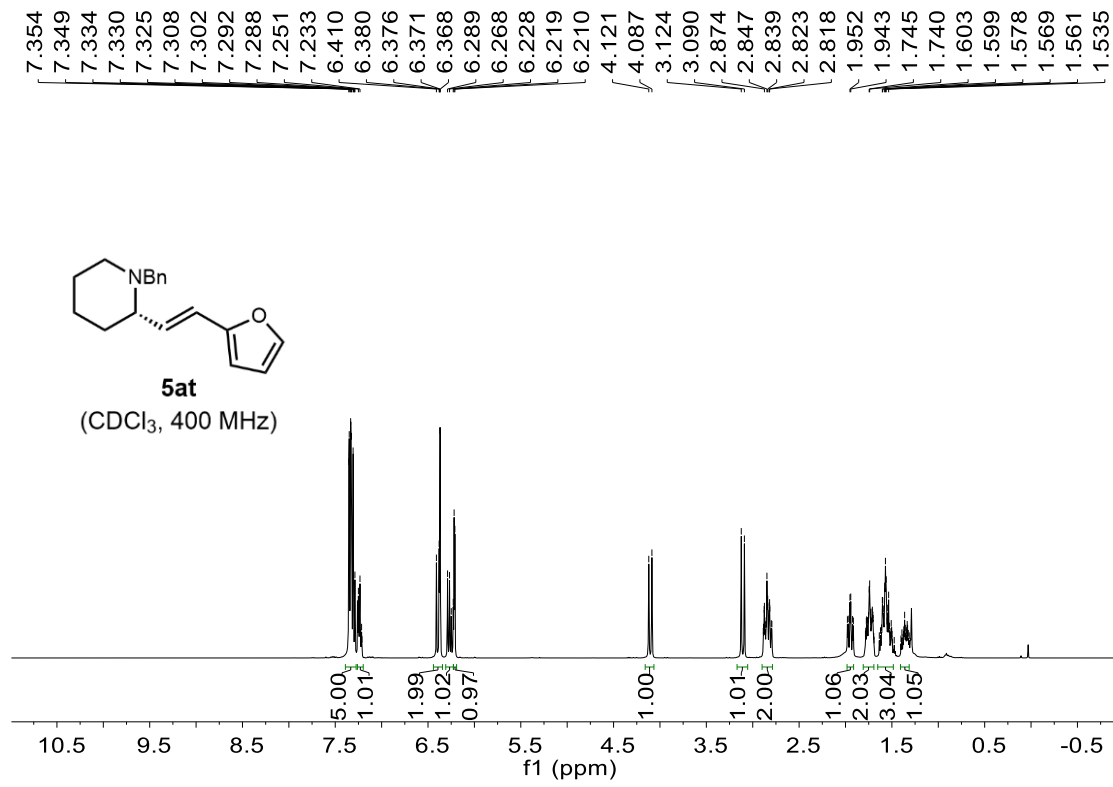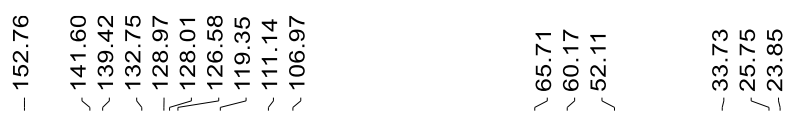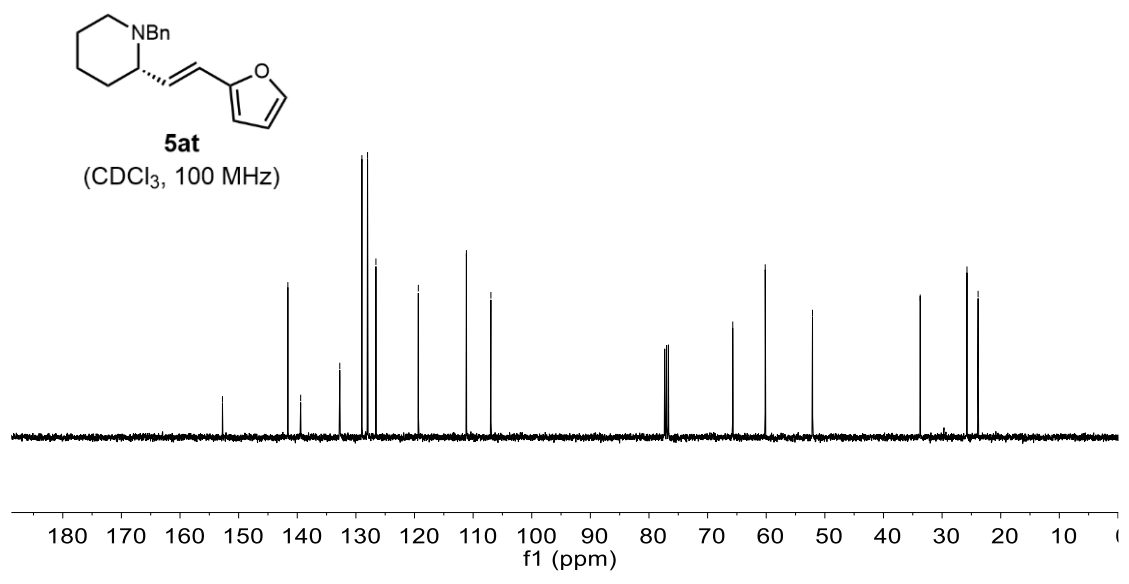

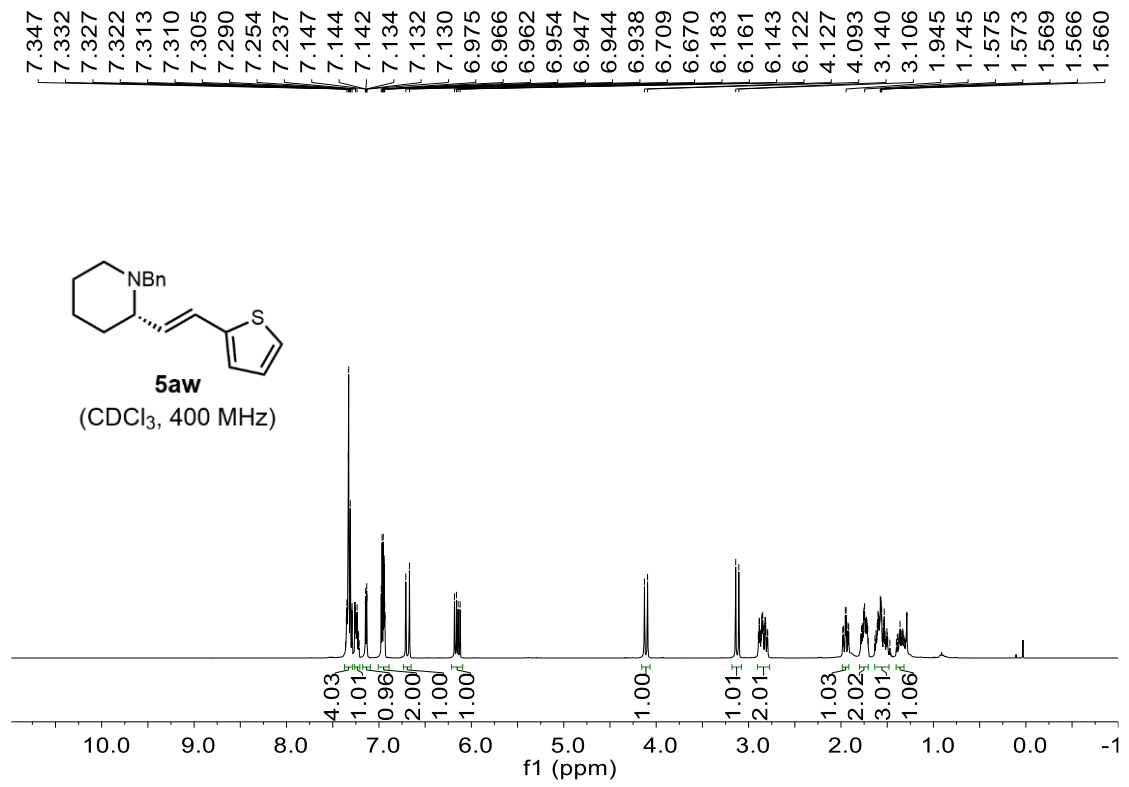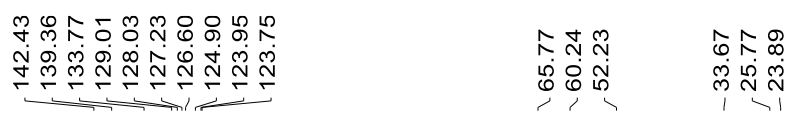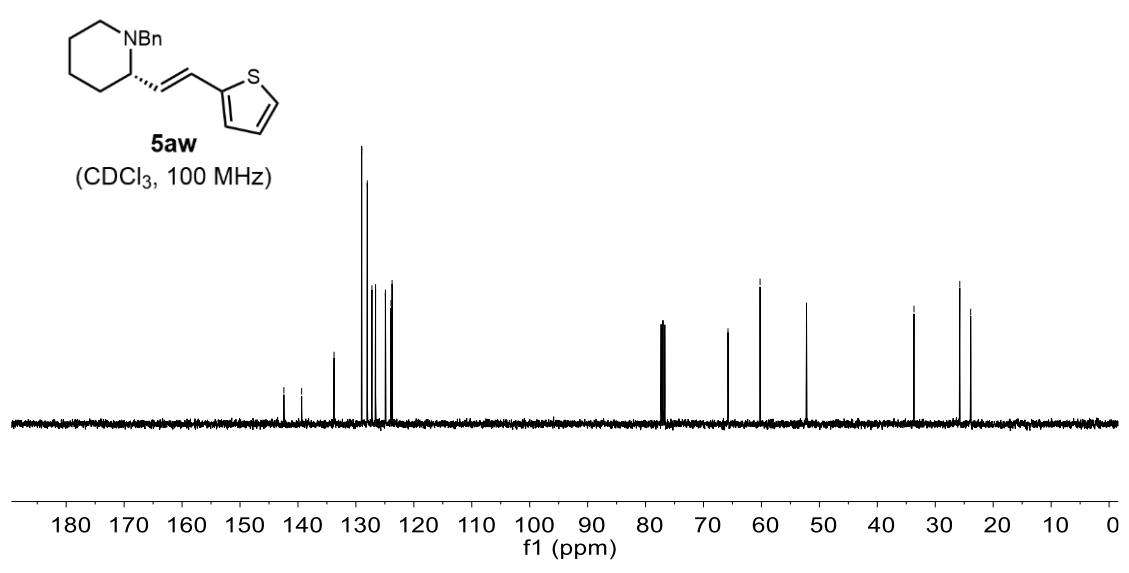

6.873  
6.818  
6.431  
6.391  
6.056  
6.037  
6.016  
5.998  
3.862  
3.692  
3.674  
3.131  
3.117  
3.111  
3.105  
3.098  
3.091  
3.086  
3.072  
2.973  
2.957  
2.952  
2.947  
2.936  
2.931  
2.927  
2.005  
2.002  
1.985  
1.856  
1.851  
1.837  
1.831  
1.819  
1.817  
1.812  
1.798  
1.585  
1.561  
1.554

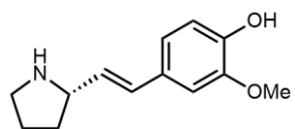

**(-)-norruspoline**  
(CDCl<sub>3</sub>, 400 MHz)

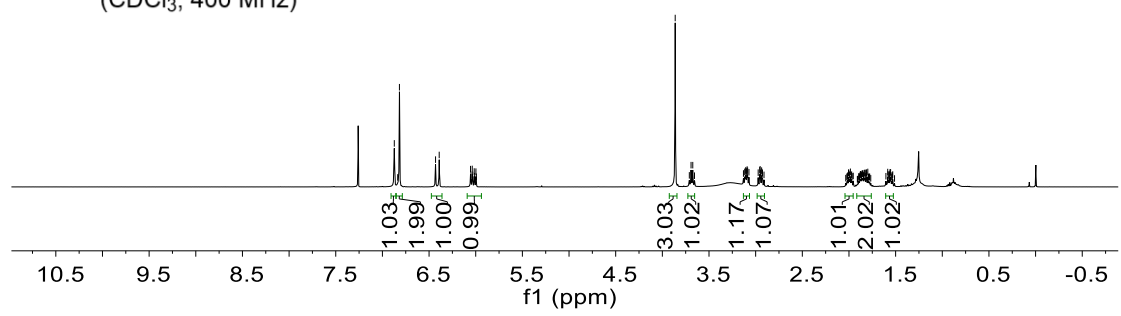

146.99  
145.74  
130.16  
129.37  
129.28  
120.03  
114.78  
108.25  
61.03  
55.75  
46.17  
32.31  
25.19

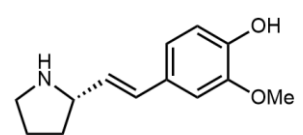

**(-)-norruspoline**  
(CDCl<sub>3</sub>, 100 MHz)

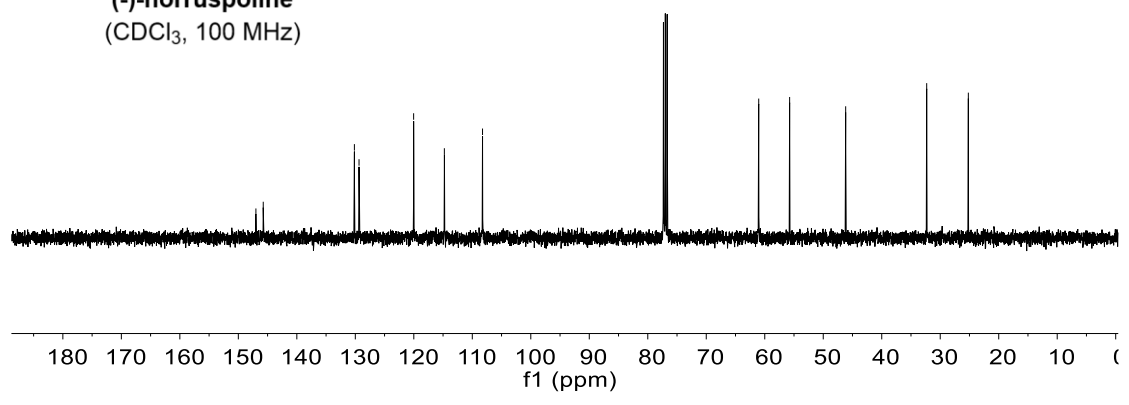

Supplement: d2sc03999k1.pdf [file d2sc03999k1.pdf]
